# Supplementary material for: Chemo- and enantioselective intramolecular silver-catalyzed aziridinations of carbamimidates
Source: Royal Society of Chemistry journal article supplement (doi:10.1039/d3cc05670h), 2023-11-30
Supplement: d3cc05670h1.pdf [file d3cc05670h1.pdf]

## Supporting Information

### Chemo- and Enantioselective Intramolecular Silver-Catalyzed Aziridinations of Carbamimidates

Tuan Anh Trinh,<sup>a</sup> Yue Fu,<sup>b</sup> Derek B. Hu,<sup>a</sup> Soren A. Zappia,<sup>a</sup> Ilia A. Guzei,<sup>a</sup> Peng Liu,<sup>b,\*</sup> Jennifer M. Schomaker<sup>a,\*</sup>

<sup>a</sup> Department of Chemistry, University of Wisconsin, Madison, Wisconsin 53706, USA

<sup>b</sup> Department of Chemistry, University of Pittsburgh, 219 Parkman Ave, Pittsburgh, PA 15260, USA

|                                                                                 |      |
|---------------------------------------------------------------------------------|------|
| <b>Table of Contents</b> .....                                                  | S1   |
| <b>I. General Information</b> .....                                             | S2   |
| <b>II. Synthesis and Characterization of Carbamimidate Substrates</b> .....     | S3   |
| <b>III. Enantioselective Aziridinations with Carbamimidate Substrates</b> ..... | S18  |
| <b>IV. Post-Functionalization of Enantioenriched Bicyclic Aziridines</b> .....  | S34  |
| <b>V. X-ray Crystallographic Information</b> .....                              | S37  |
| <b>VI. Computational Studies</b> .....                                          | S54  |
| <b>VII. References</b> .....                                                    | S80  |
| <b>VIII. NMR Spectra</b> .....                                                  | S82  |
| <b>IX. HPLC Chromatograms</b> .....                                             | S199 |

## I. General Information

All glassware was either oven-dried overnight at 130 °C or flame-dried using a Bunsen burner. All glassware was then allowed to cool to room temperature in a desiccator filled with Drierite™ as a desiccant or under a stream of dry nitrogen prior to use. Unless otherwise specified, reagents were used as obtained from Sigma-Aldrich, Oakwood Products, Alfa Aesar, Tokyo Chemical Industry, Combi-Blocks, Acros Organics or Cayman Chemicals and directly used without further purification. Diethyl ether (Et<sub>2</sub>O), tetrahydrofuran (THF), dichloromethane (CH<sub>2</sub>Cl<sub>2</sub>), acetonitrile (CH<sub>3</sub>CN), and toluene were passed through an alumina column before use. All other solvents were purified using accepted procedures from the sixth edition of "Purification of Laboratory Chemicals".<sup>1</sup> Air- and moisture-sensitive reactions were performed using standard Schlenk techniques under a nitrogen atmosphere. Analytical thin layer chromatography (TLC) was performed utilizing pre-coated silica gel 60 F<sub>24</sub> plates containing a fluorescent indicator, while preparative chromatography was performed using SilicaFlash P60 silica gel (230-400 mesh). Product purification was typically carried out by preparative TLC, or by column chromatography using a gradient method employing mixtures of hexanes and ethyl acetate (EtOAc), or dichloromethane (DCM) and methanol (MeOH). Various stains were used to visualize reaction products, including ninhydrin and KMnO<sub>4</sub>. <sup>1</sup>H NMR and <sup>13</sup>C NMR spectra were obtained using Bruker Avance-400 (400 and 100 MHz) and Bruker Avance-500 (500 and 125 MHz) spectrometers. <sup>1</sup>H chemical shifts were reported using tetramethylsilane (TMS) (CDCl<sub>3</sub> referenced at δ 0.00) or protiated solvent peaks as an internal standard (CD<sub>3</sub>CN referenced at δ 1.94). <sup>13</sup>C chemical shifts were reported using absolute referencing (TMS in CDCl<sub>3</sub>, φ = 1%,  $\bar{\epsilon}$  = 25.145020). High-performance liquid chromatography (HPLC) analyses were performed using Shimadzu LC-20AB. A CHIRALCEL® OD-H (0.46 cm diameter x 25 cm), CHIRALCEL® OJ-H column (0.46 cm diameter x 25 cm), or CHIRALPAK® IC (0.46 cm diameter x 25 cm) was employed, maintained at a temperature of 40 °C, using <sup>i</sup>PrOH/hexane or 0.1% HCO<sub>2</sub>H/H<sub>2</sub>O/MeCN mobile phase. Accurate mass measurements were acquired at the University of Wisconsin-Madison using a Micromass LCT (electrospray ionization, time-of-flight analyzer, or electron impact methods).

## II. Synthesis and Characterization of Carbamimidate Substrates

### 1. General Methods for the Synthesis of (Homo)allylic Alcohol Precursors

Alcohol precursors of **Compounds 1f, 1u, 1v, 1w, and 1y** are commercially available. Alcohol precursors of **Compounds 1s<sup>2</sup> and 1t<sup>3</sup>** were synthesized following reported procedures.

**General Method A:**<sup>4,5</sup> Alcohol precursors of **Compounds 1a, 1c, 1d, 1e, 1h, 1k, 1l, and 1m**

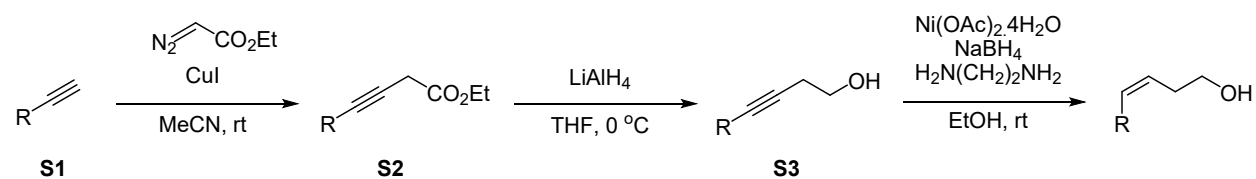

To a solution of CuI (5 mol %) in dry MeCN under N<sub>2</sub> atmosphere was added terminal alkyne **S1** (1 equiv.). Ethyl diazoacetate (87 wt % DCM, 1.05 equiv.) was then added dropwise, and the reaction mixture was stirred overnight at rt. Upon removal of solvent, the resulting residue was dissolved in Et<sub>2</sub>O and filtered through a pad of Celite, and the filtrate was concentrated under reduced pressure. Flash column chromatography using a gradient of hexane/Et<sub>2</sub>O mixtures afforded **S2**.

A solution of ester **S2** (1 equiv.) in THF at 0 °C was treated with portionwise addition of LAH (0.6 equiv.), and the mixture was stirred at 0 °C for 30 min. The reaction was quenched using Fieser's work-up procedure: a mixture containing *x* g of LAH at 0 °C was treated with slow addition of *x* mL of H<sub>2</sub>O, 2*x* mL of a 10% aqueous NaOH solution, and 2*x* mL of H<sub>2</sub>O, then diluted with Et<sub>2</sub>O and dried over MgSO<sub>4</sub> with vigorous stirring for 15 min at rt. The resulting mixture was filtered through a pad of MgSO<sub>4</sub>. The filtrate was concentrated under reduced pressure to afford homopropargyl alcohol **S3**, which was used in the next step without purification.

To a solution of Ni(OAc)<sub>2</sub>·4H<sub>2</sub>O (1 equiv.) in EtOH under H<sub>2</sub> atmosphere, was added NaBH<sub>4</sub> (1 equiv.) in EtOH at rt. After stirring for 30 min, ethylenediamine (4 equiv.) and **S3** (1 equiv.) in EtOH were added sequentially. The reaction mixture was allowed to stir for 4 h. Upon completion of the reaction and removal

of EtOH under reduced pressure, the crude product was purified by column chromatography (hexane/EtOAc gradient) gradients to afford the corresponding *Z*-homoallylic alcohol.

**General Method B:**<sup>6</sup> Alcohol precursors of Compounds **1b**, **1g**, **1i**, **1j**, and **1n**

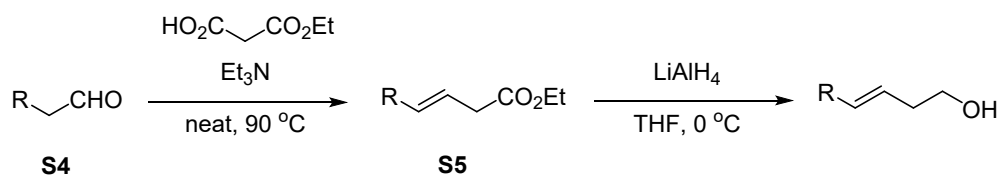

The aldehyde **S4** (1 equiv.) was treated with monoethylmalonate (1.5 equiv.) and Et<sub>3</sub>N (2.0 equiv.). The reaction mixture was heated to 90 °C under neat conditions overnight, then cooled to rt and concentrated under reduced pressure. The crude mixture was purified by column chromatography (hexane/Et<sub>2</sub>O gradient) to afford **S5**.

To a solution of ester **S5** (1 equiv.) in THF at 0 °C was added LAH portionwise (0.6 equiv.), and the mixture was stirred at 0 °C for 30 min. The reaction was quenched using Fieser's work-up procedure as described above and filtered through a pad of MgSO<sub>4</sub>. The filtrate was concentrated under reduced pressure to afford the corresponding *E*-homoallylic alcohol, which was used in the next step without purification.

**General Method C:**<sup>7</sup> Alcohol precursors of Compounds **1q** and **1r**

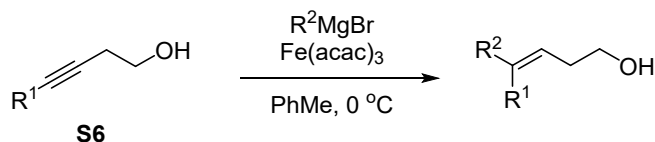

A solution of homopropargyl alcohol **S6** (1 equiv.) and Fe(acac)<sub>3</sub> (20 mol%) in toluene at -78 °C was treated with dropwise addition of the appropriate Grignard reagent (5 equiv.). The resulting black mixture was warmed to 0 °C and stirred for 7 h at this temperature. After cooling to -78 °C, saturated aqueous NH<sub>4</sub>Cl and Et<sub>2</sub>O were added. The organic layer was extracted with Et<sub>2</sub>O, dried over Na<sub>2</sub>SO<sub>4</sub>, and concentrated

under reduced pressure. The crude product was purified by column chromatography (hexane/EtOAc gradient) to afford the corresponding 1,2,2'-trisubstituted homoallylic alcohol.

**General Method D:** Alcohol precursor of Compound **1o**

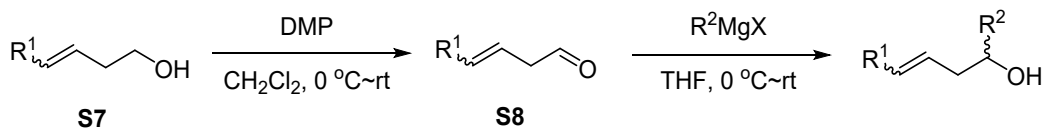

To a solution of homoallylic alcohol **S7** (1 equiv.) in  $\text{CH}_2\text{Cl}_2$  at  $0\text{ }^\circ\text{C}$  was added Dess-Martin periodinane (1.2 equiv.) portionwise. The reaction mixture was stirred for 3 h at rt and quenched by the addition of saturated aqueous  $\text{Na}_2\text{S}_2\text{O}_3$ . After washing with saturated aqueous  $\text{Na}_2\text{S}_2\text{O}_3$ , then saturated aqueous  $\text{NaHCO}_3$ , and brine, the organic layer was dried over  $\text{Na}_2\text{SO}_4$  and concentrated under reduced pressure to afford **S8**, which was used in the next step without purification.

A solution of aldehyde **S8** (1 equiv.) in THF at  $0\text{ }^\circ\text{C}$  was treated by dropwise addition to the appropriate Grignard reagent (1.2 equiv.). The reaction mixture was warmed to rt at stirred for 4 h, then it was cooled to  $0\text{ }^\circ\text{C}$  and quenched by the addition of saturated aqueous  $\text{NH}_4\text{Cl}$ . The organic layer was extracted with EtOAc, washed with brine, dried over  $\text{Na}_2\text{SO}_4$ , and concentrated under reduced pressure. The crude product was purified by column chromatography (hexane/EtOAc gradient) to afford the corresponding secondary homoallylic alcohol.

**General Method E:**<sup>5,8</sup> Alcohol precursor of Compound **1p**

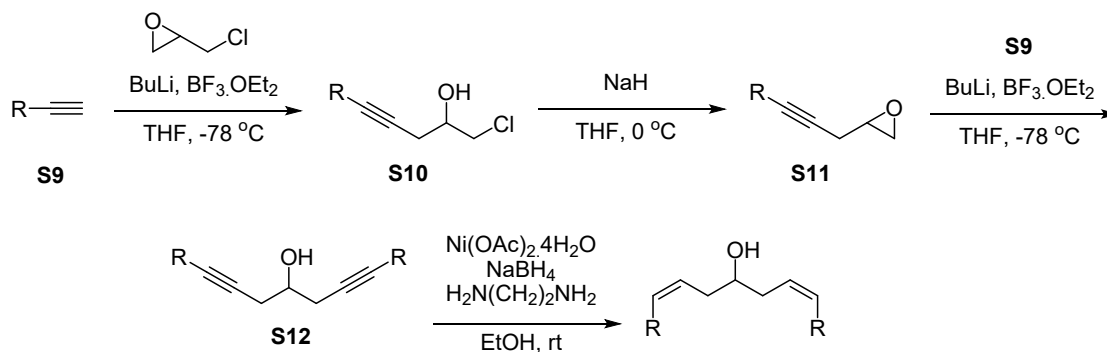

To a solution of terminal alkyne **S9** (1.5 equiv.) in THF at -78 °C was added *n*-BuLi (2.5 M in THF, 1.6 equiv.) dropwise. After stirring for 10 min, BF<sub>3</sub>·Et<sub>2</sub>O (1.6 equiv.) was added dropwise. The mixture was stirred for another 10 min before epichlorohydrin (1 equiv.) was added dropwise. After stirring for another hour at -78 °C, the mixture was warmed to 0 °C and quenched by the addition of saturated aqueous NH<sub>4</sub>Cl. The organic layer was extracted with Et<sub>2</sub>O, washed with brine, dried over Na<sub>2</sub>SO<sub>4</sub>, and concentrated under reduced pressure to afford **S10**, which was used in the next step without purification.

To a solution of chlorohydrin **S10** (1 equiv.) in THF was added NaH (60% dispersion in mineral oil, 1.5 equiv.) at 0 °C. The mixture was stirred at 0 °C for 2 h then quenched by the addition of water and Et<sub>2</sub>O. The organic layer was extracted with Et<sub>2</sub>O, washed with water, dried over Na<sub>2</sub>SO<sub>4</sub>, and concentrated under reduced pressure. The crude product was purified by passing through a short pad of silica gel using hexane/Et<sub>2</sub>O (1:1) as an eluent to afford **S11**.

To a solution of terminal alkyne **S9** (1.5 equiv.) in THF at -78 °C was added *n*-BuLi (2.5 M in THF, 1.6 equiv.) dropwise. After stirring for 10 min, BF<sub>3</sub>·Et<sub>2</sub>O (1.6 equiv.) was added dropwise. The mixture was stirred for another 10 min before a solution of **S11** (1 equiv.) in THF was added dropwise. After stirring for another hour at -78 °C, the mixture was warmed to 0 °C and quenched by the addition of saturated aqueous NH<sub>4</sub>Cl. The organic layer was extracted by Et<sub>2</sub>O, washed with brine, dried over Na<sub>2</sub>SO<sub>4</sub>, and concentrated under reduced pressure to afford **S12**, which was used in the next step without purification.

A solution of Ni(OAc)<sub>2</sub>·4H<sub>2</sub>O (2 equiv.) in EtOH under H<sub>2</sub> atmosphere was treated with NaBH<sub>4</sub> (2 equiv.) in EtOH at rt. After stirring for 30 min, ethylenediamine (8 equiv.) and **S12** (1 equiv.) in EtOH were added sequentially. The reaction mixture was allowed to stir for 4 h. Upon completion of the reaction and removal of EtOH under reduced pressure, the crude product was purified by column chromatography (hexane/EtOAc gradient) gradients to afford the corresponding symmetrical secondary bis-(*Z*-homoallyl) alcohol.

**General Method F:** Alcohol precursor of **Compounds 1q-s**

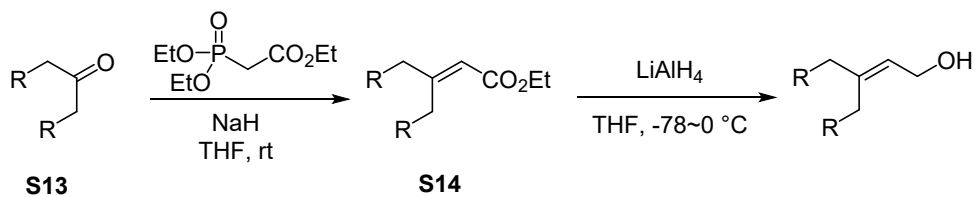

To a suspension of NaH (60% dispersion in mineral oil, 1.2 equiv.) in THF (0.2 M) at rt was added triethyl phosphonoacetate (1.05 equiv.) dropwise. The resulting mixture was stirred at rt for 1 h before ketone **S13** (1 equiv.) was added dropwise. The reaction mixture was stirred at rt overnight then diluted with Et<sub>2</sub>O and quenched with saturated aqueous NaHCO<sub>3</sub>. The organic layer was washed with brine, dried over Na<sub>2</sub>SO<sub>4</sub>, and concentrated under reduced pressure to afford **S14**, which was used in the next step without purification.

To a solution of **S14** (1 equiv.) in Et<sub>2</sub>O (0.25 M) at -78 °C was added LAH (0.6 equiv.) in one portion. The reaction mixture was stirred at -78 °C for 2 h and allowed to warm up to 0 °C over a period of 30 min. The reaction was then quenched using Fieser's work-up procedure as described above and filtered through a pad of MgSO<sub>4</sub>. The filtrate was concentrated under reduced pressure to afford the corresponding 1,1',2-trisubstituted allylic alcohol, which was used in the next step without purification.

## 2. General Procedure for the Synthesis of Carbamimidate Substrates

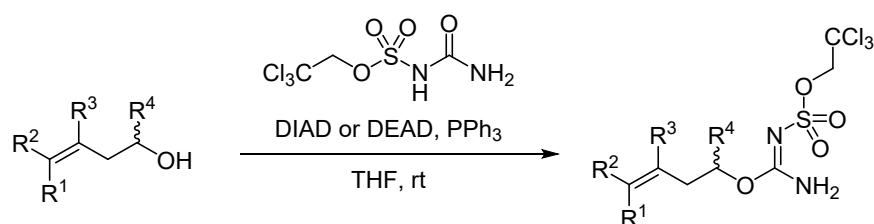

Diisopropyl azodicarboxylate or diethyl azodicarboxylate (1.30 equiv.) were added dropwise to a solution of homoallylic alcohol precursor (1 equiv.), *N*-(2,2,2-trichloroethoxysulfonyl)urea (TcesNHC(O)NH<sub>2</sub>, 1.33 equiv.), and PPh<sub>3</sub> (1.30 equiv.) in THF (0.3 M) at 0 °C. The reaction mixture was then warmed to rt and allowed to stir overnight until TLC indicated complete consumption of the starting alcohol. The solvent was removed under reduced pressure. Flash column chromatography on silica gel using a gradient of

EtOAc/hexanes mixtures afforded the corresponding carbamimidate. *Note:* TcesNHC(O)NH<sub>2</sub> was synthesized at multiple-gram scale following a previously reported procedure.<sup>9</sup>

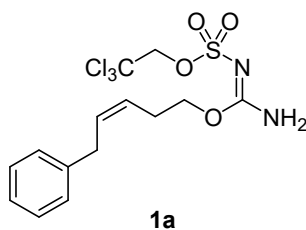

**Compound 1a:** Off-white solid, 723 mg (38%). <sup>1</sup>H NMR (500 MHz, CDCl<sub>3</sub>) δ 7.30 (t, *J* = 7.4 Hz, 2H), 7.23 – 7.17 (m, 3H), 6.95 (br s, 1H), 5.80 (dt, *J* = 10.8, 7.6, 1.5 Hz, 1H), 5.55 – 5.46 (m, 1H), 5.22 (br s, 1H), 4.65 (s, 2H), 4.29 (t, *J* = 6.6 Hz, 2H), 3.43 (d, *J* = 7.8 Hz, 2H), 2.56 (qd, *J* = 6.6, 1.7 Hz, 2H). <sup>13</sup>C NMR (126 MHz, CDCl<sub>3</sub>) δ 160.3, 140.4, 131.7, 128.5, 128.2, 126.1, 124.7, 93.7, 78.5, 68.4, 33.4, 26.6. HRMS (ESI) *m/z* calculated for C<sub>14</sub>H<sub>17</sub>Cl<sub>3</sub>N<sub>2</sub>O<sub>4</sub>S [M-H]<sup>-</sup>, 412.9902; found, 412.9905.

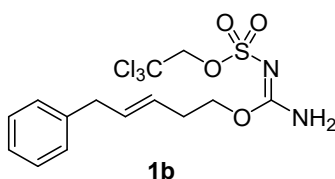

**Compound 1b:** White solid, 151 mg (32%). <sup>1</sup>H NMR (500 MHz, CDCl<sub>3</sub>) δ 7.30 (t, *J* = 7.4 Hz, 2H), 7.20 (td, *J* = 7.0, 1.4 Hz, 1H), 7.17 (d, *J* = 6.7 Hz, 2H), 7.02 (br s, 1H), 5.71 (dt, *J* = 15.3, 6.9, 1.4 Hz, 1H), 5.50 – 5.31 (m, 2H), 4.67 (s, 2H), 4.28 (t, *J* = 6.7 Hz, 2H), 3.35 (d, *J* = 6.7 Hz, 2H), 2.42 (qd, *J* = 6.7, 1.2 Hz, 2H). <sup>13</sup>C NMR (126 MHz, CDCl<sub>3</sub>) δ 160.3, 140.2, 133.0, 128.47, 128.46, 126.1, 125.5, 93.7, 78.5, 68.6, 39.0, 31.6. HRMS (ESI) *m/z* calculated for C<sub>14</sub>H<sub>17</sub>Cl<sub>3</sub>N<sub>2</sub>O<sub>4</sub>S [M+H]<sup>+</sup>, 415.0047; found, 415.0043.

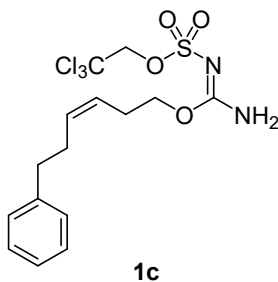



**Compound 1c:** White solid, 337 mg (52%). <sup>1</sup>H NMR (500 MHz, CDCl<sub>3</sub>) δ 7.31 – 7.26 (m, 2H), 7.23 – 7.14 (m, 3H), 6.99 (br s, 1H), 5.63 – 5.52 (m, 1H), 5.33 (dtt, *J* = 10.5, 7.2, 1.6 Hz, 2H), 4.65 (s, 2H), 4.13 (t, *J* = 6.8 Hz, 2H), 2.68 (t, *J* = 7.5 Hz, 2H), 2.36 (dq, *J* = 20.8, 7.1, 1.6 Hz, 4H). <sup>13</sup>C NMR (126 MHz, CDCl<sub>3</sub>) δ 160.3, 141.6, 132.4, 128.5, 128.3, 125.9, 124.2, 93.7, 78.5, 68.5, 35.6, 29.2, 26.5. HRMS (ESI) *m/z* calculated for C<sub>15</sub>H<sub>19</sub>Cl<sub>3</sub>N<sub>2</sub>O<sub>4</sub>S [M+H]<sup>+</sup>, 429.0204; found, 429.0201.

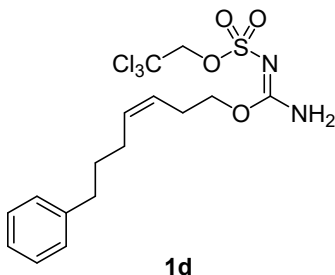

**Compound 1d:** White solid, 322 mg (29%). <sup>1</sup>H NMR (500 MHz, CDCl<sub>3</sub>) δ 7.31 – 7.26 (m, 2H), 7.18 (td, *J* = 7.2, 1.6 Hz, 3H), 7.01 (br s, 1H), 5.61 – 5.53 (m, 1H), 5.47 – 5.28 (m, 2H), 4.66 (s, 2H), 4.24 (t, *J* = 6.8 Hz, 2H), 2.66 – 2.59 (m, 2H), 2.41 (qd, *J* = 6.9, 1.7 Hz, 2H), 2.09 (qd, *J* = 7.4, 1.8 Hz, 2H), 1.70 (p, *J* = 7.6 Hz, 2H). <sup>13</sup>C NMR (126 MHz, CDCl<sub>3</sub>) δ 160.3, 142.2, 133.2, 128.4, 128.3, 125.8, 123.8, 93.7, 78.5, 68.7, 35.4, 31.1, 26.9, 26.6. HRMS (ESI) *m/z* calculated for C<sub>16</sub>H<sub>21</sub>Cl<sub>3</sub>N<sub>2</sub>O<sub>4</sub>S [M+H]<sup>+</sup>, 443.0360; found, 443.0356.

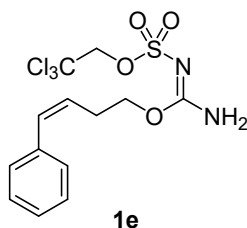

**Compound 1e:** White solid, 388 mg (50%). <sup>1</sup>H NMR (500 MHz, CDCl<sub>3</sub>) δ 7.39 – 7.33 (m, 2H), 7.29 – 7.22 (m, 3H), 7.03 (br s, 1H), 6.59 (dt, *J* = 11.6, 2.0 Hz, 1H), 5.62 (dt, *J* = 11.7, 7.3 Hz, 1H), 5.42 (br s, 1H), 4.65 (s, 2H), 4.34 (t, *J* = 6.7 Hz, 2H), 2.73 (qd, *J* = 6.7, 1.8 Hz, 2H). <sup>13</sup>C NMR (126 MHz, CDCl<sub>3</sub>) δ 160.3,

136.8, 132.3, 128.6, 128.4, 127.1, 126.0, 93.7, 78.5, 68.6, 27.8. HRMS (ESI)  $m/z$  calculated for  $C_{13}H_{15}Cl_3N_2O_4S$   $[M+H]^+$ , 400.9891; found, 400.9887.

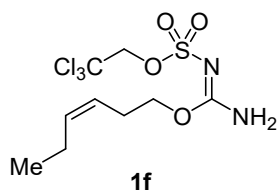

**Compound 1f**: White solid, 220 mg (62%).  $^1H$  NMR (500 MHz,  $CDCl_3$ )  $\delta$  7.05 (br s, 1H), 5.58 – 5.51 (m, 1H), 5.43 (br s, 1H), 5.32 – 5.25 (m, 1H), 4.67 (s, 2H), 4.26 (t,  $J = 6.9$  Hz, 2H), 2.49 – 2.40 (m, 2H), 2.12 – 2.01 (m, 2H), 0.98 (t,  $J = 7.5$  Hz, 3H).  $^{13}C$  NMR (126 MHz,  $CDCl_3$ )  $\delta$  160.3, 135.4, 122.6, 93.7, 78.5, 68.7, 26.5, 20.7, 14.2. HRMS (ESI)  $m/z$  calculated for  $C_9H_{15}Cl_3N_2O_4S$   $[M+H]^+$ , 352.9891; found, 352.9886.

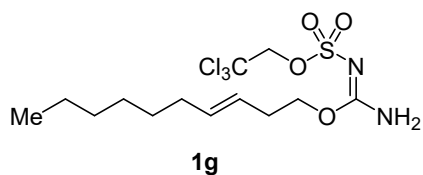

**Compound 1g**: White solid, 324 mg (51%).  $^1H$  NMR (500 MHz,  $CDCl_3$ )  $\delta$  7.03 (br s, 1H), 5.54 (dt,  $J = 15.0, 6.7, 1.4$  Hz, 1H), 5.44 (br s, 1H), 5.33 (dt,  $J = 15.3, 6.9, 1.5$  Hz, 1H), 4.67 (s, 2H), 4.25 (t,  $J = 6.8$  Hz, 2H), 2.37 (qd,  $J = 6.8, 1.3$  Hz, 2H), 2.00 (qd,  $J = 6.9, 1.4$  Hz, 2H), 1.39 – 1.21 (m, 8H), 0.88 (t,  $J = 7.0$  Hz, 3H).  $^{13}C$  NMR (126 MHz,  $CDCl_3$ )  $\delta$  160.4, 134.6, 123.9, 93.7, 78.5, 68.9, 32.6, 31.7 (overlapped), 29.3, 28.8, 22.6, 14.1. HRMS (ESI)  $m/z$  calculated for  $C_{13}H_{23}Cl_3N_2O_4S$   $[M+H]^+$ , 409.0517; found, 409.0514.

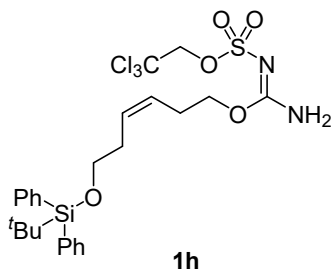

**Compound 1h:** Colorless semisolid, 607 mg (32%).  $^1\text{H}$  NMR (500 MHz,  $\text{CDCl}_3$ )  $\delta$  7.69 – 7.64 (m, 4H), 7.46 – 7.41 (m, 2H), 7.41 – 7.35 (m, 4H), 6.92 (br s, 1H), 5.61 – 5.52 (m, 1H), 5.44 – 5.35 (m, 1H), 5.30 (br s, 1H), 4.65 (s, 2H), 4.20 (t,  $J = 6.6$  Hz, 2H), 3.66 (t,  $J = 6.8$  Hz, 2H), 2.37 (qd,  $J = 6.6, 1.5$  Hz, 2H), 2.31 (q,  $J = 6.9$  Hz, 2H), 1.05 (s, 9H).  $^{13}\text{C}$  NMR (126 MHz,  $\text{CDCl}_3$ )  $\delta$  160.3, 135.6, 133.8, 129.7, 129.6, 127.7, 125.4, 93.7, 78.5, 68.5, 63.4, 30.9, 26.8, 26.6, 19.2. HRMS (ESI)  $m/z$  calculated for  $\text{C}_{25}\text{H}_{33}\text{Cl}_3\text{N}_2\text{O}_5\text{SSi}$   $[\text{M}+\text{NH}_4]^+$ , 624.1283; found, 624.1281.

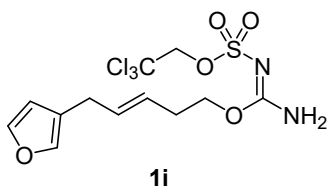

**Compound 1i:** Off-white solid, 210 mg (41%).  $^1\text{H}$  NMR (500 MHz,  $\text{CDCl}_3$ )  $\delta$  7.32 (dd,  $J = 1.9, 0.9$  Hz, 1H), 7.12 – 6.94 (m, 1H), 6.29 (dd,  $J = 3.2, 1.9$  Hz, 1H), 6.00 (dq,  $J = 3.0, 0.9$  Hz, 1H), 5.72 – 5.64 (m, 1H), 5.50 (dtt,  $J = 15.1, 6.8, 1.5$  Hz, 1H), 5.46 – 5.34 (m, 1H), 4.67 (s, 2H), 4.28 (t,  $J = 6.7$  Hz, 2H), 3.36 (dt,  $J = 6.6, 1.1$  Hz, 2H), 2.43 (qd,  $J = 6.7, 1.3$  Hz, 2H).  $^{13}\text{C}$  NMR (126 MHz,  $\text{CDCl}_3$ )  $\delta$  160.3, 153.8, 141.3, 129.4, 126.7, 110.3, 105.4, 93.7, 78.5, 68.5, 31.5, 31.4. HRMS (ESI)  $m/z$  calculated for  $\text{C}_{12}\text{H}_{15}\text{Cl}_3\text{N}_2\text{O}_5\text{S}$   $[\text{M}+\text{H}]^+$ , 404.9840; found, 404.9835.

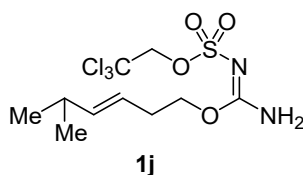

**Compound 1j:** White solid, 221 mg (24%).  $^1\text{H}$  NMR (500 MHz,  $\text{CDCl}_3$ )  $\delta$  7.03 (br s, 1H), 5.51 (dtd,  $J = 15.4, 6.6, 1.4$  Hz, 1H), 5.44 (br s, 1H), 5.29 (dtd,  $J = 15.3, 6.8, 1.4$  Hz, 1H), 4.67 (s, 2H), 4.25 (t,  $J = 6.9$  Hz, 2H), 2.37 (qt,  $J = 6.9, 1.2$  Hz, 2H), 2.26 (dq,  $J = 13.4, 6.7$  Hz, 1H), 0.97 (d,  $J = 6.9$  Hz, 6H).  $^{13}\text{C}$  NMR (126 MHz,  $\text{CDCl}_3$ )  $\delta$  160.3, 141.5, 120.9, 93.7, 78.5, 68.9, 31.6, 31.1, 22.4. HRMS (ESI)  $m/z$  calculated for  $\text{C}_{11}\text{H}_{19}\text{Cl}_3\text{N}_2\text{O}_4\text{S}$   $[\text{M}+\text{H}]^+$ , 367.0047; found, 367.0045.

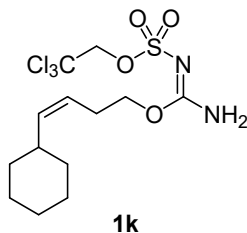

**Compound 1k:** White solid, 239 mg (54%).  $^1\text{H}$  NMR (500 MHz,  $\text{CDCl}_3$ )  $\delta$  7.05 (br s, 1H), 5.51 – 5.33 (m, 2H), 5.21 (dtd,  $J = 10.8, 7.2, 1.1$  Hz, 1H), 4.67 (s, 2H), 4.25 (t,  $J = 6.9$  Hz, 2H), 2.45 (qd,  $J = 6.9, 1.5$  Hz, 2H), 2.29 – 2.16 (m, 1H), 1.71 (dt,  $J = 13.3, 3.7$  Hz, 2H), 1.66 (ddt,  $J = 14.5, 3.5, 1.5$  Hz, 1H), 1.62 – 1.55 (m, 2H), 1.35 – 1.23 (m, 2H), 1.18 (tt,  $J = 12.5, 3.3$  Hz, 1H), 1.08 (qd,  $J = 12.8, 3.3$  Hz, 2H).  $^{13}\text{C}$  NMR (126 MHz,  $\text{CDCl}_3$ )  $\delta$  160.3, 139.8, 121.3, 93.8, 78.5, 68.9, 36.5, 33.2, 26.8, 25.9, 25.8. HRMS (ESI)  $m/z$  calculated for  $\text{C}_{13}\text{H}_{21}\text{Cl}_3\text{N}_2\text{O}_4\text{S}$   $[\text{M}+\text{H}]^+$ , 407.0360; found, 407.0357.

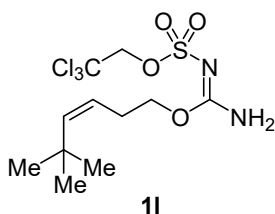

**Compound 1l:** White solid, 201 mg (49%).  $^1\text{H}$  NMR (500 MHz,  $\text{CDCl}_3$ )  $\delta$  7.05 (br s, 1H), 5.49 (dt,  $J = 12.1, 1.8$  Hz, 2H), 5.10 (dt,  $J = 12.1, 7.3$  Hz, 1H), 4.67 (s, 2H), 4.27 (t,  $J = 6.8$  Hz, 2H), 2.60 (qd,  $J = 6.9, 1.8$  Hz, 2H), 1.12 (s, 9H).  $^{13}\text{C}$  NMR (126 MHz,  $\text{CDCl}_3$ )  $\delta$  160.3, 143.4, 121.9, 93.7, 78.5, 69.0, 33.4, 31.0, 27.5. HRMS (ESI)  $m/z$  calculated for  $\text{C}_{11}\text{H}_{19}\text{Cl}_3\text{N}_2\text{O}_4\text{S}$   $[\text{M}+\text{H}]^+$ , 381.0204; found, 381.0200.

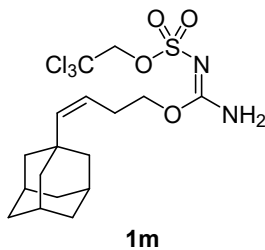

**Compound 1m:** White solid, 288 mg (42%). <sup>1</sup>H NMR (500 MHz, CDCl<sub>3</sub>) δ 7.05 (br s, 1H), 5.44 (br s, 1H), 5.22 (dt, *J* = 12.2, 1.8 Hz, 1H), 5.08 (dt, *J* = 12.2, 7.3 Hz, 1H), 4.67 (s, 2H), 4.25 (t, *J* = 6.9 Hz, 2H), 2.62 (qd, *J* = 7.0, 1.8 Hz, 2H), 2.01 – 1.92 (m, 3H), 1.78 – 1.64 (m, 12H). <sup>13</sup>C NMR (126 MHz, CDCl<sub>3</sub>) δ 160.3, 143.6, 121.6, 93.7, 78.5, 69.2, 43.0, 36.7, 36.0, 28.6, 28.0. HRMS (ESI) *m/z* calculated for C<sub>17</sub>H<sub>25</sub>Cl<sub>3</sub>N<sub>2</sub>O<sub>4</sub>S [M+H]<sup>+</sup>, 459.0673; found, 459.0668.

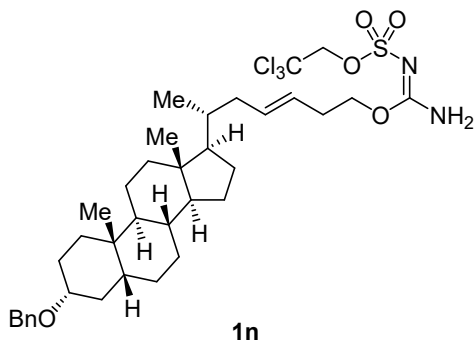

**Compound 1n:** White solid, 383 mg (54%). <sup>1</sup>H NMR (500 MHz, CDCl<sub>3</sub>) δ 7.37 – 7.31 (m, 4H), 7.29 – 7.24 (m, 1H), 7.03 (br s, 1H), 5.50 (ddd, *J* = 14.7, 8.1, 6.3 Hz, 1H), 5.43 (br s, 1H), 5.32 (dt, *J* = 14.7, 6.8 Hz, 1H), 4.67 (s, 2H), 4.56 (s, 2H), 4.26 (t, *J* = 6.8 Hz, 2H), 3.37 (td, *J* = 11.0, 5.4 Hz, 1H), 2.39 (q, *J* = 6.8 Hz, 2H), 2.12 (d, *J* = 13.8 Hz, 1H), 1.94 (dt, *J* = 12.4, 3.3 Hz, 1H), 1.90 – 1.77 (m, 4H), 1.73 (dt, *J* = 13.9, 8.3 Hz, 1H), 1.64 (d, *J* = 12.8 Hz, 1H), 1.57 (ddd, *J* = 9.5, 6.5, 3.6 Hz, 1H), 1.49 – 1.30 (m, 7H), 1.30 – 1.16 (m, 4H), 1.16 – 0.99 (m, 5H), 0.94 – 0.89 (m, 4H), 0.88 (d, *J* = 6.6 Hz, 3H), 0.64 (s, 3H). <sup>13</sup>C NMR (126 MHz, CDCl<sub>3</sub>) δ 160.3, 139.2, 132.8, 128.3, 127.6, 127.3, 125.3, 93.7, 78.6, 78.5, 69.9, 68.9, 56.5, 55.9, 42.7, 42.1, 40.3, 40.1, 39.2, 36.0, 35.9, 35.4, 34.9, 33.2, 31.8, 28.3, 27.3, 27.2, 26.4, 24.2, 23.4, 20.8, 18.6, 12.1. HRMS (ESI) *m/z* calculated for C<sub>36</sub>H<sub>53</sub>Cl<sub>3</sub>N<sub>2</sub>O<sub>5</sub>S [M+NH<sub>4</sub>]<sup>+</sup>, 748.3079; found, 748.3077.

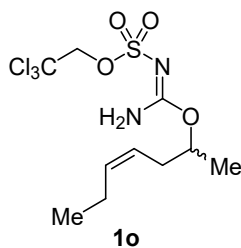

**Compound 1o:** White solid, 97.0 mg (21%).  $^1\text{H}$  NMR (500 MHz,  $\text{CDCl}_3$ )  $\delta$  7.03 (br s, 1H), 5.61 – 5.49 (m, 1H), 5.38 (br s, 1H), 5.32 – 5.23 (m, 1H), 5.14 – 5.04 (m, 1H), 4.66 (s, 2H), 2.46 – 2.38 (m, 1H), 2.31 (dt,  $J = 13.4, 6.1$  Hz, 1H), 2.05 (pd,  $J = 7.5, 1.9$  Hz, 2H), 1.30 (d,  $J = 6.3$  Hz, 3H), 0.97 (t,  $J = 7.6$  Hz, 3H).  $^{13}\text{C}$  NMR (126 MHz,  $\text{CDCl}_3$ )  $\delta$  160.0, 135.3, 122.4, 93.7, 78.5, 76.5, 33.3, 20.7, 19.4, 14.1. HRMS (ESI)  $m/z$  calculated for  $\text{C}_{10}\text{H}_{17}\text{Cl}_3\text{N}_2\text{O}_4\text{S}$   $[\text{M}+\text{H}]^+$ , 367.0047; found, 367.0043.

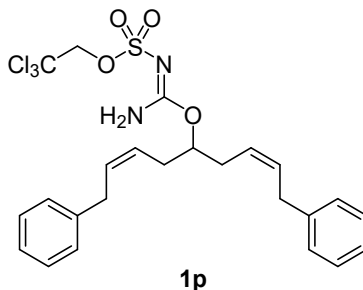

**Compound 1p:** Colorless semisolid, 68.8 mg (17%).  $^1\text{H}$  NMR (500 MHz,  $\text{CDCl}_3$ )  $\delta$  7.32 – 7.27 (m, 4H), 7.22 – 7.16 (m, 6H), 6.84 (br s, 1H), 5.80 (dtt,  $J = 10.7, 7.7, 1.5$  Hz, 2H), 5.55 – 5.46 (m, 2H), 5.13 (tt,  $J = 7.0, 5.4$  Hz, 1H), 4.97 (d,  $J = 7.1$  Hz, 1H), 4.59 (s, 2H), 3.41 (d,  $J = 7.6$  Hz, 4H), 2.61 – 2.53 (m, 2H), 2.47 (dddd,  $J = 14.6, 7.1, 5.4, 1.5$  Hz, 2H).  $^{13}\text{C}$  NMR (126 MHz,  $\text{CDCl}_3$ )  $\delta$  160.1, 140.4, 131.9, 128.5, 128.3, 126.1, 124.2, 93.6, 78.8, 78.4, 33.4, 31.4. HRMS (ESI)  $m/z$  calculated for  $\text{C}_{24}\text{H}_{27}\text{Cl}_3\text{N}_2\text{O}_4\text{S}$   $[\text{M}+\text{Na}]^+$ , 567.0649; found, 567.0646.

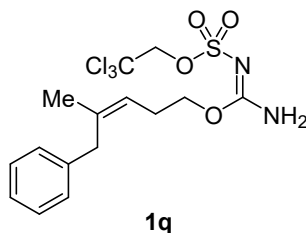

**Compound 1q:** Colorless semisolid, 140 mg (44%).  $^1\text{H}$  NMR (500 MHz,  $\text{CDCl}_3$ )  $\delta$  7.32 – 7.26 (m, 2H), 7.22 – 7.17 (m, 1H), 7.17 – 7.13 (m, 2H), 7.00 (br s, 1H), 5.34 (br s, 1H), 5.29 (td,  $J = 7.2, 1.5$  Hz, 1H), 4.65 (s, 2H), 4.27 (t,  $J = 6.8$  Hz, 2H), 3.39 (s, 2H), 2.53 (qd,  $J = 6.9, 1.2$  Hz, 2H), 1.68 (d,  $J = 1.4$  Hz, 3H).

$^{13}\text{C}$  NMR (126 MHz,  $\text{CDCl}_3$ )  $\delta$  160.3, 139.5, 137.9, 128.46, 128.45, 126.1, 120.5, 93.7, 78.5, 68.9, 37.8, 27.5, 23.6. HRMS (ESI)  $m/z$  calculated for  $\text{C}_{15}\text{H}_{19}\text{Cl}_3\text{N}_2\text{O}_4\text{S}$   $[\text{M}+\text{H}]^+$ , 429.0204; found, 429.0199.

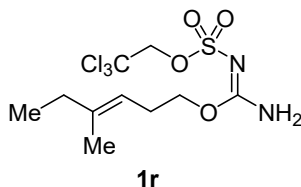

**Compound 1r:** White solid, 92.6 mg (39%).  $^1\text{H}$  NMR (500 MHz,  $\text{CDCl}_3$ )  $\delta$  7.05 (br s, 1H), 5.43 (br s, 1H), 5.07 (tq,  $J = 7.2, 1.4$  Hz, 1H), 4.67 (s, 2H), 4.23 (t,  $J = 7.0$  Hz, 2H), 2.40 (q,  $J = 7.0$  Hz, 2H), 2.01 (q,  $J = 7.4$  Hz, 2H), 1.63 (s, 3H), 0.99 (t,  $J = 7.4$  Hz, 3H).  $^{13}\text{C}$  NMR (126 MHz,  $\text{CDCl}_3$ )  $\delta$  160.4, 141.1, 116.5, 93.7, 78.5, 69.0, 32.3, 27.2, 16.1, 12.6. HRMS (ESI)  $m/z$  calculated for  $\text{C}_{10}\text{H}_{17}\text{Cl}_3\text{N}_2\text{O}_4\text{S}$   $[\text{M}+\text{H}]^+$ , 367.0047; found, 367.0049.

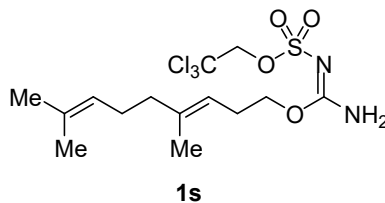

**Compound 1s:** Colorless semisolid, 161 mg (21%).  $^1\text{H}$  NMR (500 MHz,  $\text{CDCl}_3$ )  $\delta$  7.03 (br s, 1H), 5.44 (br s, 1H), 5.14 – 5.04 (m, 2H), 4.67 (s, 2H), 4.22 (t,  $J = 7.1$  Hz, 2H), 2.40 (q,  $J = 7.5$  Hz, 2H), 2.08 (q,  $J = 7.3$  Hz, 2H), 2.04 – 1.95 (m, 2H), 1.68 (d,  $J = 1.4$  Hz, 3H), 1.63 (d,  $J = 1.4$  Hz, 3H), 1.61 (d,  $J = 1.1$  Hz, 3H).  $^{13}\text{C}$  NMR (126 MHz,  $\text{CDCl}_3$ )  $\delta$  160.4, 139.2, 131.7, 123.9, 117.9, 93.7, 78.5, 68.9, 39.6, 27.2, 26.5, 25.7, 17.7, 16.2. HRMS (ESI)  $m/z$  calculated for  $\text{C}_{14}\text{H}_{23}\text{Cl}_3\text{N}_2\text{O}_4\text{S}$   $[\text{M}+\text{Na}]^+$ , 443.0336; found, 443.0333.

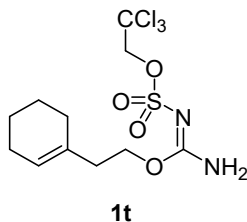

**Compound 1t:** White solid, 75.2 mg (38%).  $^1\text{H NMR}$  (500 MHz,  $\text{CDCl}_3$ )  $\delta$  7.05 (br s, 1H), 5.58 – 5.31 (m, 2H), 4.68 (s, 2H), 4.31 (t,  $J = 6.9$  Hz, 2H), 2.34 – 2.28 (m, 2H), 1.99 (ddt,  $J = 9.4, 6.4, 2.9$  Hz, 2H), 1.96 – 1.90 (m, 2H), 1.67 – 1.60 (m, 2H), 1.56 (dp,  $J = 8.4, 2.6$  Hz, 2H).  $^{13}\text{C NMR}$  (126 MHz,  $\text{CDCl}_3$ )  $\delta$  160.4, 132.7, 124.3, 93.7, 78.5, 67.8, 36.7, 28.4, 25.2, 22.7, 22.2. HRMS (ESI)  $m/z$  calculated for  $\text{C}_{11}\text{H}_{17}\text{Cl}_3\text{N}_2\text{O}_4\text{S}$   $[\text{M}+\text{H}]^+$ , 379.0047; found, 379.0044.

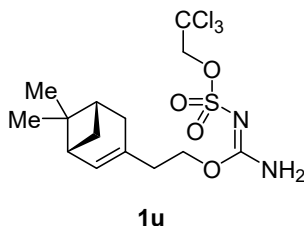

**Compound 1u:** White solid, 184 mg (44%).  $^1\text{H NMR}$  (500 MHz,  $\text{CDCl}_3$ )  $\delta$  7.02 (br s, 1H), 5.41 (br s, 1H), 5.34 – 5.23 (m, 1H), 4.67 (s, 2H), 4.32 – 4.20 (m, 2H), 2.42 – 2.36 (m, 1H), 2.34 (tt,  $J = 6.8, 1.6$  Hz, 2H), 2.30 – 2.16 (m, 2H), 2.10 (dddd,  $J = 8.6, 5.7, 2.7, 1.2$  Hz, 1H), 2.02 (td,  $J = 5.6, 1.6$  Hz, 1H), 1.28 (s, 3H), 1.14 (d,  $J = 8.6$  Hz, 1H), 0.82 (s, 3H).  $^{13}\text{C NMR}$  (126 MHz,  $\text{CDCl}_3$ )  $\delta$  160.3, 143.1, 119.5, 93.7, 78.5, 67.4, 45.6, 40.7, 38.0, 35.6, 31.6, 31.3, 26.2, 21.1. HRMS (ESI)  $m/z$  calculated for  $\text{C}_{14}\text{H}_{21}\text{Cl}_3\text{N}_2\text{O}_4\text{S}$   $[\text{M}+\text{H}]^+$ , 419.0360; found, 419.0355.

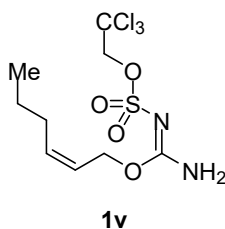

**Compound 1v:** White solid, 321 mg (61%, isolated as a 1.5:1 mixture of two rotamers).  $^1\text{H NMR}$  (500 MHz,  $\text{CDCl}_3$ )  $\delta$  7.05 (br s, 1H), 5.78 – 5.61 (m, 1H), 5.59 – 5.52 (m, 1H), 5.45 (br s, 1H), 4.89 – 4.42 (m, 4H), 2.18 – 2.06 (m, 2H), 1.42 (h,  $J = 7.3$  Hz, 2H), 0.92 (td,  $J = 7.4, 3.5$  Hz, 3H).  $^{13}\text{C NMR}$  (126 MHz,  $\text{CDCl}_3$ )  $\delta$  160.2 – 151.4, 137.0 – 135.1, 123.5 – 121.8, 93.7 – 92.6, 78.8 – 78.5, 65.0 – 45.0, 29.6 – 29.3,



22.5 – 22.4, 13.7 – 13.6. HRMS (ESI)  $m/z$  calculated for  $C_9H_{15}Cl_3N_2O_4S$   $[M+H]^+$ , 352.9891; found, 352.9886.

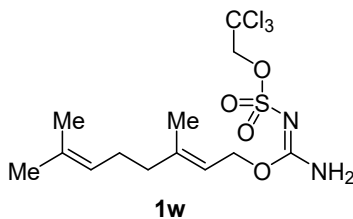

**Compound 1w:** Colorless semisolid, 180 mg (44%, isolated as a 1:1 mixture of two rotamers). <sup>1</sup>H NMR (500 MHz, CDCl<sub>3</sub>)  $\delta$  7.02 (br s, 1H), 5.41 (br s, 1H), 5.36 (dddd,  $J = 9.8, 5.7, 2.6, 1.3$  Hz, 1H), 5.06 (dddt,  $J = 6.9, 4.0, 2.7, 1.3$  Hz, 1H), 4.78 (d,  $J = 7.3$  Hz, 2H) (for rotamer 1) or 4.46 (d,  $J = 7.0$  Hz, 2H) (for rotamer 2), 4.66 (d,  $J = 5.9$  Hz, 2H), 2.15 – 1.99 (m, 4H), 1.74 (dd,  $J = 8.8, 1.4$  Hz, 3H), 1.68 (dt,  $J = 4.0, 1.3$  Hz, 3H), 1.60 (dd,  $J = 5.1, 1.2$  Hz, 3H). <sup>13</sup>C NMR (126 MHz, CDCl<sub>3</sub>)  $\delta$  160.3 – 151.6, 144.7 – 141.7, 132.1 – 131.9, 123.6 – 123.4, 118.5 – 116.7, 93.7 – 92.6, 78.7 – 78.5, 66.1 – 46.1, 39.6 – 39.5, 26.3 – 26.2, 25.7, 17.7, 16.7 – 16.4. HRMS (ESI)  $m/z$  calculated for  $C_{13}H_{21}Cl_3N_2O_4S$   $[M+Na]^+$ , 429.0180; found, 429.0173.

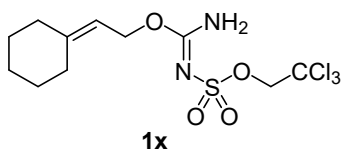

**Compound 1x:** Colorless semisolid, 117 mg (32%, isolated as a 1.5:1 mixture of two rotamers). <sup>1</sup>H NMR (500 MHz, CDCl<sub>3</sub>)  $\delta$  7.02 (br s, 1H), 5.42 (br s, 1H), 5.31 (tdt,  $J = 7.3, 4.5, 1.2$  Hz, 1H), 4.77 (d,  $J = 7.4$  Hz, 2H) (for rotamer 1) or 4.45 (d,  $J = 7.2$  Hz, 2H) (for rotamer 2), 4.67 (d,  $J = 2.9$  Hz, 2H), 2.23 (dt,  $J = 19.8, 5.2$  Hz, 2H), 2.16 – 2.07 (m, 2H), 1.61 – 1.54 (m, 6H). <sup>13</sup>C NMR (126 MHz, CDCl<sub>3</sub>)  $\delta$  160.3 – 151.6, 149.3 – 146.1, 115.5 – 113.6, 93.7 – 92.6, 78.7 – 78.5, 65.4 – 45.3, 37.0, 29.2 – 28.9, 28.3 – 28.2, 27.7 – 27.6, 26.6 – 26.5. HRMS (ESI)  $m/z$  calculated for  $C_{11}H_{17}Cl_3N_2O_4S$   $[M+Na]^+$ , 400.9867; found, 400.9862.

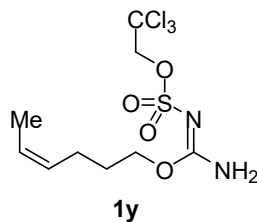

**Compound 1y:** White solid, 310 mg (58%).  $^1\text{H}$  NMR (500 MHz,  $\text{CDCl}_3$ )  $\delta$  7.06 (br s, 1H), 5.52 (dtt,  $J = 13.9, 6.9, 5.3$  Hz, 1H), 5.44 (br s, 1H), 5.35 (dddd,  $J = 10.8, 9.0, 7.4, 3.8$  Hz, 1H), 4.67 (s, 2H), 4.26 (t,  $J = 6.6$  Hz, 2H), 2.20 – 2.05 (m, 2H), 1.85 – 1.70 (m, 2H), 1.61 (dd,  $J = 6.8, 1.1$  Hz, 3H).  $^{13}\text{C}$  NMR (126 MHz,  $\text{CDCl}_3$ )  $\delta$  160.4, 128.4, 125.5, 93.7, 78.5, 68.9, 28.1, 22.8, 12.7. HRMS (ESI)  $m/z$  calculated for  $\text{C}_9\text{H}_{15}\text{Cl}_3\text{N}_2\text{O}_4\text{S}$   $[\text{M}+\text{H}]^+$ , 352.9891; found, 352.9888.

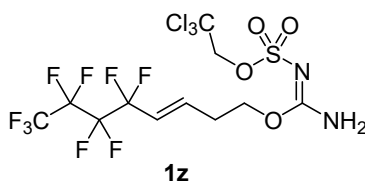

**Compound 1z:** Off-white solid, 198 mg (29%).  $^1\text{H}$  NMR (500 MHz,  $\text{CDCl}_3$ )  $\delta$  7.06 (d,  $J = 10.5$  Hz, 1H), 6.18 – 6.11 (m, 1H), 5.77 – 5.63 (m, 1H), 5.46 (br s, 1H), 4.67 (s, 2H), 4.36 (t,  $J = 6.3$  Hz, 2H), 2.84 – 2.70 (m, 2H).  $^{13}\text{C}$  NMR (126 MHz,  $\text{CDCl}_3$ )  $\delta$  160.0, 139.3 – 119.5 (m), 119.3 – 119.1 (m), 118.9 – 106.1 (m, 4C), 93.6, 78.5, 67.3, 27.8.  $^{19}\text{F}$  NMR (377 MHz,  $\text{CDCl}_3$ )  $\delta$  -80.9 – -81.1 (m, 3F), -107.3 – -107.4 (m, 2F), -124.6 (t,  $J = 10.0$  Hz, 2F), -125.8 (dt,  $J = 12.6, 6.6$  Hz, 2F). HRMS (ESI)  $m/z$  calculated for  $\text{C}_{11}\text{H}_{10}\text{Cl}_3\text{F}_9\text{N}_2\text{O}_4\text{S}$   $[\text{M}+\text{H}]^+$ , 542.9356; found, 542.9352.

### III. Enantioselective Aziridinations with Carbamimidate Substrates

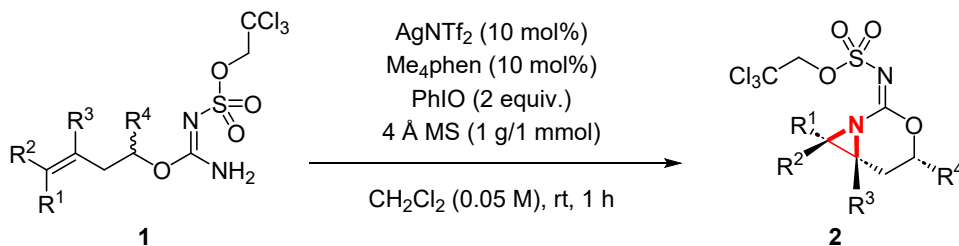

**General procedure for the racemic reaction:** In a pre-dried vial equipped with a magnetic stir bar, AgNTf<sub>2</sub> (10 mol %) and 3,4,7,8-tetramethyl-1,10-phenanthroline (10 mol %) were dissolved in CH<sub>2</sub>Cl<sub>2</sub> (0.05 M). After stirring vigorously for 15 minutes at rt, 4 Å molecular sieves (100 mg) and carbamimidate **1** (1.0 equiv.) were added. The mixture was left stirred at rt for 2 min before PhIO (2.0 equiv.) was added in one portion. Upon completion of the reaction indicated by TLC analysis (~1 h), the mixture was filtered through a pad of Celite using EtOAc as an eluent. The resulting clear solution was concentrated under reduced pressure, and the crude product was purified by column chromatography on silica gel (hexane/EtOAc gradient) to afford bicyclic aziridine *rac*-**2**.

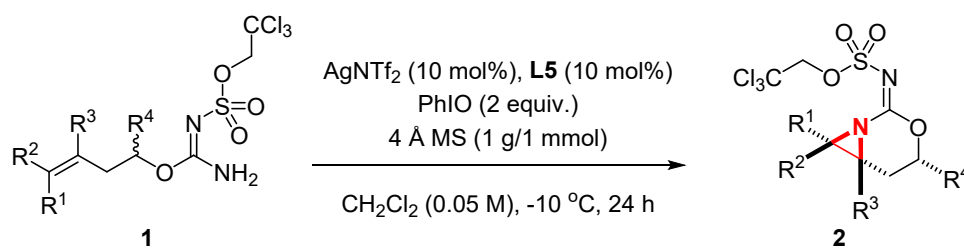

**General procedure for the enantioselective reaction:** In a pre-dried test tube (0.1 mmol scale) or a round-bottom flask (large scale) equipped with a magnetic stir bar, AgNTf<sub>2</sub> (10 mol %) and L5 (10 mol %) were dissolved in CH<sub>2</sub>Cl<sub>2</sub> (0.05 M). After stirring vigorously for 15 min at rt, 4 Å molecular sieves (100 mg) and carbamimidate **1** (1.0 equiv.) were added. The mixture was then cooled to -10 °C before PhIO (2.0 equiv.) was added in one portion. After stirring for 24 h, the mixture was filtered through a pad of Celite using EtOAc as an eluent. The resulting clear solution was concentrated under reduced pressure, and the crude product was purified by column chromatography on silica gel (hexane/EtOAc gradient) to afford bicyclic aziridine **2**.

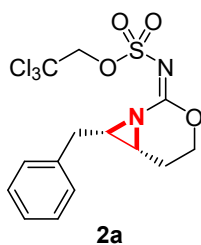

**Compound 2a:** The reaction was run on a 2.5 mmol scale. Off-white solid, 922 mg (89%, 95% *ee*). <sup>1</sup>H NMR (500 MHz, CDCl<sub>3</sub>) δ 7.38 – 7.32 (m, 2H), 7.32 – 7.26 (m, 1H), 7.25 – 7.21 (m, 2H), 4.70 (d, *J* = 1.8 Hz, 2H), 4.67 (ddd, *J* = 10.3, 4.6, 1.5 Hz, 1H), 4.44 (ddd, *J* = 12.9, 10.7, 2.4 Hz, 1H), 3.46 (dd, *J* = 15.3, 4.3 Hz, 1H), 3.26 (dt, *J* = 9.6, 4.6 Hz, 1H), 3.16 (ddd, *J* = 9.1, 6.9, 4.9 Hz, 1H), 2.49 – 2.38 (m, 2H), 1.75 (dddd, *J* = 14.8, 12.4, 9.1, 4.5 Hz, 1H). <sup>13</sup>C NMR (126 MHz, CDCl<sub>3</sub>) δ 163.6, 135.5, 129.0, 128.4, 127.4, 93.7, 78.8, 68.3, 46.8, 37.9, 30.8, 19.0. HRMS (ESI) *m/z* calculated for C<sub>14</sub>H<sub>15</sub>Cl<sub>3</sub>N<sub>2</sub>O<sub>4</sub>S [M+H]<sup>+</sup>, 412.9891, found 412.9887. The *ee* value was determined by chiral HPLC analysis of **2a** in comparison with a sample of racemic material (CHIRALCEL® OD-H, 5 to 30% *i*PrOH/hexanes gradient over 45 min, 0.7 mL/min, 210 nm): *t<sub>R</sub>*: 27.8 min (major) and 30.1 min (minor).

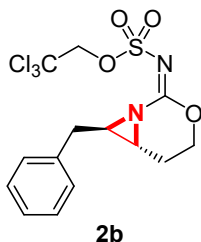

**Compound 2b:** The reaction was run on a 0.1 mmol scale. White solid, 32.9 mg (80%, 97% *ee*). <sup>1</sup>H NMR (500 MHz, CDCl<sub>3</sub>) δ 7.36 – 7.30 (m, 2H), 7.30 – 7.24 (m, 3H), 4.69 (s, 2H), 4.50 (ddd, *J* = 10.7, 4.3, 1.8 Hz, 1H), 4.34 (ddd, *J* = 12.7, 10.8, 2.2 Hz, 1H), 3.32 (dd, *J* = 15.3, 3.4 Hz, 1H), 3.03 (dd, *J* = 14.6, 6.3 Hz, 1H), 2.82 (q, *J* = 4.0 Hz, 1H), 2.75 (ddd, *J* = 9.6, 6.3, 3.7 Hz, 1H), 2.47 (ddt, *J* = 14.6, 6.3, 2.0 Hz, 1H), 1.41 (dddd, *J* = 14.8, 12.7, 8.9, 4.3 Hz, 1H). <sup>13</sup>C NMR (126 MHz, CDCl<sub>3</sub>) δ 166.4, 135.4, 129.4, 128.6, 127.2, 93.6, 78.9, 68.3, 53.1, 39.6, 36.6, 24.5. HRMS (ESI) *m/z* calculated for C<sub>14</sub>H<sub>15</sub>Cl<sub>3</sub>N<sub>2</sub>O<sub>4</sub>S [M+H]<sup>+</sup>, 412.9891; found, 412.9886. The *ee* value was determined by chiral HPLC analysis of **2b** in comparison with a sample of racemic material (CHIRALCEL® OJ-H, 5 to 35% *i*PrOH/hexanes gradient over 45 min, 0.7 mL/min, 210 nm): *t<sub>R</sub>*: 20.9 min (minor) and 24.7 min (major).

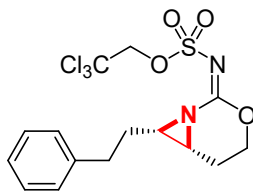

**2c**

**Compound 2c:** The reaction was run on a 0.1 mmol scale. White semisolid, 38.6 mg (90%, 99% *ee*).  $^1\text{H}$  NMR (500 MHz,  $\text{CDCl}_3$ )  $\delta$  7.30 (ddd,  $J = 7.6, 5.6, 1.6$  Hz, 2H), 7.24 – 7.14 (m, 3H), 4.70 (s, 2H), 4.50 (ddd,  $J = 10.7, 4.5, 1.5$  Hz, 1H), 4.30 (ddd,  $J = 13.0, 10.7, 2.4$  Hz, 1H), 3.06 – 2.90 (m, 3H), 2.74 (dt,  $J = 13.9, 7.9$  Hz, 1H), 2.43 – 2.29 (m, 1H), 1.96 (ddt,  $J = 15.0, 6.6, 2.3$  Hz, 1H), 1.50 – 1.36 (m, 1H), 1.20 (dddd,  $J = 15.0, 13.1, 8.9, 4.7$  Hz, 1H).  $^{13}\text{C}$  NMR (126 MHz,  $\text{CDCl}_3$ )  $\delta$  163.9, 139.8, 128.7, 128.5, 126.6, 93.7, 78.8, 68.4, 46.5, 37.9, 32.5, 26.9, 18.5. HRMS (ESI)  $m/z$  calculated for  $\text{C}_{15}\text{H}_{17}\text{Cl}_3\text{N}_2\text{O}_4\text{S}$   $[\text{M}+\text{H}]^+$ , 427.0047; found, 427.0040. The *ee* value was determined by chiral HPLC analysis of **2c** in comparison with a sample of racemic material (CHIRALCEL® OJ-H, 5 to 35% *i*PrOH/hexanes gradient over 45 min, 0.7 mL/min, 210 nm):  $t_{\text{R}}$ : 22.2 min (minor) and 23.8 min (major).

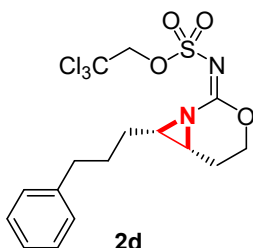

**2d**

**Compound 2d:** The reaction was run on a 0.1 mmol scale. White semisolid, 34.3 mg (78%, 75% *ee*).  $^1\text{H}$  NMR (500 MHz,  $\text{CDCl}_3$ )  $\delta$  7.32 – 7.26 (m, 2H), 7.22 – 7.14 (m, 3H), 4.69 (d,  $J = 0.6$  Hz, 2H), 4.56 (ddd,  $J = 10.6, 4.6, 1.5$  Hz, 1H), 4.36 (ddd,  $J = 12.9, 10.7, 2.4$  Hz, 1H), 3.04 (ddd,  $J = 9.0, 6.9, 5.0$  Hz, 1H), 2.96 (dt,  $J = 8.7, 5.0$  Hz, 1H), 2.76 – 2.60 (m, 2H), 2.28 (dddd,  $J = 14.8, 6.9, 2.4, 1.5$  Hz, 1H), 2.09 – 1.92 (m, 2H), 1.79 – 1.67 (m, 1H), 1.41 (dddd,  $J = 14.9, 12.4, 9.1, 4.6$  Hz, 1H), 1.25 – 1.16 (m, 1H).  $^{13}\text{C}$  NMR (126 MHz,  $\text{CDCl}_3$ )  $\delta$  163.8, 141.0, 128.5, 128.3, 126.2, 93.7, 78.8, 68.2, 46.8, 37.6, 35.3, 27.9, 24.7, 18.5. HRMS (ESI)  $m/z$  calculated for  $\text{C}_{16}\text{H}_{19}\text{Cl}_3\text{N}_2\text{O}_4\text{S}$   $[\text{M}+\text{H}]^+$ , 441.0204; found, 441.0199. The *ee* value was

determined by chiral HPLC analysis of **2d** in comparison with a sample of racemic material (CHIRALCEL® OD-H, 5 to 30% *i*PrOH/hexanes gradient over 45 min, 0.7 mL/min, 210 nm):  $t_R$ : 27.0 min (major) and 31.1 min (minor).

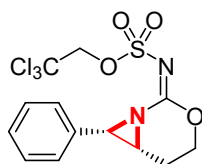

**2e**

**Compound 2e:** The reaction was run on a 0.1 mmol scale. White semisolid, 14.9 mg (37%, 62% *ee*).  $^1\text{H}$  NMR (500 MHz,  $\text{CDCl}_3$ )  $\delta$  7.45 – 7.38 (m, 3H), 7.37 – 7.33 (m, 2H), 4.65 (ddd,  $J = 10.8, 4.7, 1.6$  Hz, 1H), 4.55 – 4.43 (m, 3H), 4.17 (d,  $J = 5.1$  Hz, 1H), 3.32 (ddd,  $J = 9.2, 6.5, 5.1$  Hz, 1H), 2.33 (dddd,  $J = 15.0, 6.6, 2.5, 1.6$  Hz, 1H), 1.72 (dddd,  $J = 14.8, 12.5, 9.2, 4.6$  Hz, 1H).  $^{13}\text{C}$  NMR (126 MHz,  $\text{CDCl}_3$ )  $\delta$  162.0, 129.30, 129.27, 129.25, 128.8, 93.6, 78.6, 68.2, 48.5, 37.9, 18.9. HRMS (ESI)  $m/z$  calculated for  $\text{C}_{13}\text{H}_{13}\text{Cl}_3\text{N}_2\text{O}_4\text{S}$   $[\text{M}+\text{H}]^+$ , 398.9734; found, 398.9728. The *ee* value was determined by chiral HPLC analysis of **2e** in comparison with a sample of racemic material (CHIRALCEL® OD-H, 5 to 30% *i*PrOH/hexanes gradient over 45 min, 0.7 mL/min, 210 nm):  $t_R$ : 31.6 min (major) and 38.9 min (minor).

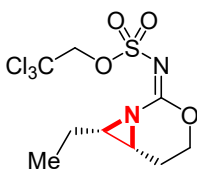

**2f**

**Compound 2f:** The reaction was run on a 0.1 mmol scale. White solid, 27.9 mg (79%, 95% *ee*).  $^1\text{H}$  NMR (500 MHz,  $\text{CDCl}_3$ )  $\delta$  4.71 (d,  $J = 1.0$  Hz, 2H), 4.60 (ddd,  $J = 10.7, 4.6, 1.5$  Hz, 1H), 4.39 (ddd,  $J = 12.9, 10.7, 2.4$  Hz, 1H), 3.07 (ddd,  $J = 9.1, 6.9, 5.0$  Hz, 1H), 2.95 (dt,  $J = 9.7, 5.0$  Hz, 1H), 2.34 (dddd,  $J = 14.8, 7.0, 2.4, 1.5$  Hz, 1H), 2.08 (dp,  $J = 13.3, 6.8$  Hz, 1H), 1.59 – 1.47 (m, 1H), 1.24 – 1.14 (m, 1H), 1.11 (t,  $J = 7.2$  Hz, 3H).  $^{13}\text{C}$  NMR (126 MHz,  $\text{CDCl}_3$ )  $\delta$  163.8, 93.7, 78.8, 68.1, 48.1, 37.5, 18.8, 18.4, 10.5. HRMS

(ESI)  $m/z$  calculated for  $C_9H_{13}Cl_3N_2O_4S [M+H]^+$ , 350.9734; found, 350.9736. The *ee* value was determined by chiral HPLC analysis of **2f** in comparison with a sample of racemic material (CHIRALCEL® OD-H, 5 to 30% <sup>i</sup>PrOH/hexanes gradient over 45 min, 0.7 mL/min, 210 nm):  $t_R$ : 21.3 min (major) and 22.0 min (minor).

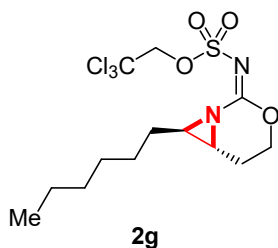

**Compound 2g:** The reaction was run on a 0.1 mmol scale. White semisolid, 37.0 mg (91%, 93% *ee*). <sup>1</sup>H NMR (500 MHz, CDCl<sub>3</sub>)  $\delta$  4.71 (s, 2H), 4.54 (ddd,  $J = 10.7, 4.3, 1.8$  Hz, 1H), 4.39 (ddd,  $J = 12.7, 10.7, 2.1$  Hz, 1H), 2.77 (ddd,  $J = 8.9, 6.1, 3.5$  Hz, 1H), 2.57 – 2.47 (m, 2H), 1.96 (s, 1H), 1.58 (dq,  $J = 14.3, 7.5$  Hz, 1H), 1.49 – 1.24 (m, 9H), 0.89 (t,  $J = 6.9$  Hz, 3H). <sup>13</sup>C NMR (126 MHz, CDCl<sub>3</sub>)  $\delta$  166.5, 93.7, 78.9, 68.4, 53.5, 40.4, 31.6, 31.0, 28.8, 25.8, 24.8, 22.5, 14.0. HRMS (ESI)  $m/z$  calculated for  $C_{13}H_{21}Cl_3N_2O_4S [M+H]^+$ , 407.0360; found, 407.0354. The *ee* value was determined by chiral HPLC analysis of **2g** in comparison with a sample of racemic material (CHIRALCEL® OD-H, 5 to 30% <sup>i</sup>PrOH/hexanes gradient over 45 min, 0.7 mL/min, 210 nm):  $t_R$ : 17.6 min (minor) and 18.8 min (major).

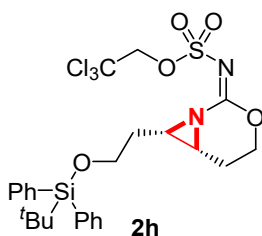

**Compound 2h:** The reaction was run on a 0.1 mmol scale. White solid, 39.2 mg (65%, 90% *ee*). <sup>1</sup>H NMR (500 MHz, CDCl<sub>3</sub>)  $\delta$  7.63 (ddt,  $J = 6.5, 4.9, 1.5$  Hz, 4H), 7.48 – 7.42 (m, 2H), 7.40 (dd,  $J = 8.0, 6.5$  Hz, 4H), 4.66 (s, 2H), 4.56 (ddd,  $J = 10.8, 4.5, 1.5$  Hz, 1H), 4.35 (ddd,  $J = 12.9, 10.7, 2.4$  Hz, 1H), 3.91 – 3.81 (m, 2H), 3.08 (dt,  $J = 9.4, 4.5$  Hz, 1H), 3.02 (ddd,  $J = 9.0, 6.9, 5.0$  Hz, 1H), 2.33 – 2.18 (m, 2H), 1.59 – 1.47

(m, 1H), 1.41 (dtd,  $J = 14.6, 8.9, 5.4$  Hz, 1H), 1.05 (s, 9H).  $^{13}\text{C}$  NMR (126 MHz,  $\text{CDCl}_3$ )  $\delta$  164.0, 135.5, 133.0, 129.9, 127.9, 93.7, 78.7, 68.3, 60.7, 45.4, 38.0, 28.0, 26.8, 19.14, 19.13. HRMS (ESI)  $m/z$  calculated for  $\text{C}_{25}\text{H}_{31}\text{Cl}_3\text{N}_2\text{O}_5\text{SSi}$   $[\text{M}+\text{H}]^+$ , 605.0861; found, 605.0856. The *ee* value was determined by chiral HPLC analysis of **2h** in comparison with a sample of racemic material (CHIRALCEL® OD-H, 5 to 30%  $^i\text{PrOH}$ /hexanes gradient over 45 min, 0.7 mL/min, 210 nm):  $t_{\text{R}}$ : 17.7 min (major) and 20.1 min (minor).

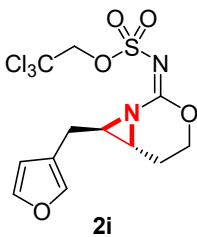

**Compound 2i:** The reaction was run on a 0.1 mmol scale. Yellow solid, 30.0 mg (74%, 95% *ee*).  $^1\text{H}$  NMR (500 MHz,  $\text{CDCl}_3$ )  $\delta$  7.35 (dd,  $J = 1.8, 0.9$  Hz, 1H), 6.33 (dd,  $J = 3.2, 1.8$  Hz, 1H), 6.25 (dd,  $J = 3.2, 0.8$  Hz, 1H), 4.71 (s, 2H), 4.53 (ddd,  $J = 10.8, 4.3, 1.8$  Hz, 1H), 4.39 (ddd,  $J = 12.8, 10.8, 2.2$  Hz, 1H), 3.45 (d,  $J = 13.1$  Hz, 1H), 2.97 (dd,  $J = 15.7, 6.9$  Hz, 1H), 2.88 (ddd,  $J = 8.9, 6.3, 3.6$  Hz, 1H), 2.81 (dt,  $J = 7.8, 4.0$  Hz, 1H), 2.54 (ddt,  $J = 14.8, 6.3, 2.1$  Hz, 1H), 1.44 (dddd,  $J = 14.8, 13.0, 8.9, 4.3$  Hz, 1H).  $^{13}\text{C}$  NMR (126 MHz,  $\text{CDCl}_3$ )  $\delta$  166.3, 149.7, 142.1, 110.6, 108.0, 93.6, 79.0, 68.3, 51.0, 39.9, 29.8, 24.5. HRMS (ESI)  $m/z$  calculated for  $\text{C}_{12}\text{H}_{13}\text{Cl}_3\text{N}_2\text{O}_5\text{S}$   $[\text{M}+\text{H}]^+$ , 402.9683; found, 402.9679. The *ee* value was determined by chiral HPLC analysis of **2i** in comparison with a sample of racemic material (CHIRALCEL® OD-H, 5 to 30%  $^i\text{PrOH}$ /hexanes gradient over 45 min, 0.7 mL/min, 210 nm):  $t_{\text{R}}$ : 24.1 min (minor) and 25.0 min (major).

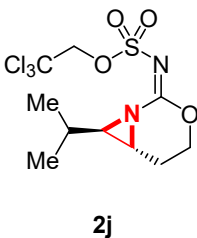

**Compound 2j:** The reaction was run on a 0.1 mmol scale. White semisolid, 27.5 mg (75%, 96% *ee*).  $^1\text{H}$  NMR (500 MHz,  $\text{CDCl}_3$ )  $\delta$  4.70 (d,  $J = 1.6$  Hz, 2H), 4.57 (ddd,  $J = 10.7, 4.2, 1.7$  Hz, 1H), 4.42 (ddd,  $J =$



12.7, 10.7, 2.2 Hz, 1H), 2.86 – 2.77 (m, 1H), 2.51 (ddt,  $J = 14.8, 6.2, 2.0$  Hz, 1H), 2.35 (dd,  $J = 6.4, 3.6$  Hz, 1H), 1.91 (h,  $J = 6.4$  Hz, 1H), 1.49 – 1.38 (m, 1H), 1.09 (d,  $J = 6.7$  Hz, 3H), 0.99 (d,  $J = 6.9$  Hz, 3H).  $^{13}\text{C}$  NMR (126 MHz,  $\text{CDCl}_3$ )  $\delta$  166.4, 93.7, 78.9, 68.8, 58.4, 38.4, 29.2, 24.8, 19.2, 17.8. HRMS (ESI)  $m/z$  calculated for  $\text{C}_{10}\text{H}_{15}\text{Cl}_3\text{N}_2\text{O}_4\text{S}$   $[\text{M}+\text{H}]^+$ , 364.9891; found, 364.9888. The *ee* value was determined by chiral HPLC analysis of **2j** in comparison with a sample of racemic material (CHIRALCEL® OD-H, 5 to 30%  $i$ PrOH/hexanes gradient over 45 min, 0.7 mL/min, 210 nm):  $t_{\text{R}}$ : 16.6 min (minor) and 18.1 min (major).

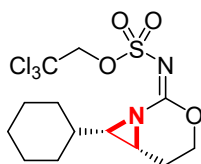

**2k**

**Compound 2k:** The reaction was run on a 0.1 mmol scale. White solid, 34.2 mg (84%, 96% *ee*).  $^1\text{H}$  NMR (500 MHz,  $\text{CDCl}_3$ )  $\delta$  4.68 (d,  $J = 2.4$  Hz, 2H), 4.63 (ddd,  $J = 10.7, 4.4, 1.7$  Hz, 1H), 4.40 (ddd,  $J = 12.8, 10.7, 2.4$  Hz, 1H), 2.98 (ddd,  $J = 9.3, 6.7, 5.0$  Hz, 1H), 2.68 (dd,  $J = 9.5, 5.2$  Hz, 1H), 2.58 – 2.47 (m, 1H), 2.36 (ddt,  $J = 14.8, 6.9, 2.1$  Hz, 1H), 1.82 – 1.72 (m, 2H), 1.72 – 1.65 (m, 1H), 1.52 (dddd,  $J = 14.6, 12.4, 9.5, 4.4$  Hz, 2H), 1.36 – 1.06 (m, 6H).  $^{13}\text{C}$  NMR (126 MHz,  $\text{CDCl}_3$ )  $\delta$  163.7, 93.7, 78.7, 68.5, 51.3, 36.9, 35.6, 30.5, 29.8, 25.9, 25.5, 25.2, 19.4. HRMS (ESI)  $m/z$  calculated for  $\text{C}_{13}\text{H}_{19}\text{Cl}_3\text{N}_2\text{O}_4\text{S}$   $[\text{M}+\text{H}]^+$ , 405.0204; found, 405.0202. The *ee* value was determined by chiral HPLC analysis of **2k** in comparison with a sample of racemic material (CHIRALCEL® OD-H, 5 to 30%  $i$ PrOH/hexanes gradient over 45 min, 0.7 mL/min, 210 nm):  $t_{\text{R}}$ : 19.3 min (minor) and 19.7 min (major).

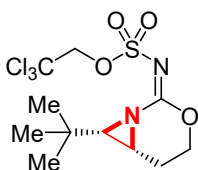

**2l**

**Compound 2l:** The reaction was run on a 0.1 mmol scale. White solid, 29.5 mg (78%, 95% *ee*). <sup>1</sup>H NMR (500 MHz, CDCl<sub>3</sub>) δ 4.76 – 4.64 (m, 3H), 4.36 (ddd, *J* = 12.1, 10.7, 2.6 Hz, 1H), 2.92 (ddd, *J* = 9.8, 7.0, 5.3 Hz, 1H), 2.80 (d, *J* = 5.3 Hz, 1H), 2.31 (dddd, *J* = 14.8, 6.9, 2.7, 1.6 Hz, 1H), 2.19 (dddd, *J* = 14.6, 12.4, 9.8, 4.5 Hz, 1H), 1.23 (s, 9H). <sup>13</sup>C NMR (126 MHz, CDCl<sub>3</sub>) δ 162.6, 93.8, 78.6, 68.2, 56.0, 37.8, 33.7, 28.6, 18.8. HRMS (ESI) *m/z* calculated for C<sub>11</sub>H<sub>17</sub>Cl<sub>3</sub>N<sub>2</sub>O<sub>4</sub>S [M+H]<sup>+</sup>, 379.0047; found, 379.0044. The *ee* value (95%) was determined by chiral HPLC analysis of **2l** in comparison with a sample of racemic material (CHIRALCEL® OD-H, 5 to 30% *i*PrOH/hexanes gradient over 45 min, 0.7 mL/min, 210 nm): *t*<sub>R</sub>: 21.4 min (major) and 22.1 min (minor).

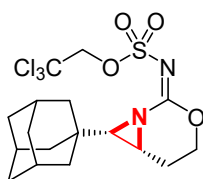

**2m**

**Compound 2m:** The reaction was run on a 0.1 mmol scale. White solid, 34.7 mg (82%, 96% *ee*). <sup>1</sup>H NMR (500 MHz, CDCl<sub>3</sub>) δ 4.78 – 4.69 (m, 2H), 4.66 (ddd, *J* = 10.5, 4.3, 1.8 Hz, 1H), 4.33 (td, *J* = 11.3, 3.1 Hz, 1H), 2.88 (ddd, *J* = 9.8, 7.0, 5.3 Hz, 1H), 2.57 (d, *J* = 5.5 Hz, 1H), 2.38 – 2.23 (m, 2H), 2.07 – 1.96 (m, 6H), 1.81 – 1.67 (m, 9H). <sup>13</sup>C NMR (126 MHz, CDCl<sub>3</sub>) δ 162.8, 93.8, 78.6, 68.2, 56.7, 40.2, 37.9, 36.5, 36.1, 28.0, 19.9. HRMS (ESI) *m/z* calculated for C<sub>17</sub>H<sub>23</sub>Cl<sub>3</sub>N<sub>2</sub>O<sub>4</sub>S [M+H]<sup>+</sup>, 457.0517; found, 457.0511. The *ee* value was determined by chiral HPLC analysis of **2m** in comparison with a sample of racemic material (CHIRALCEL® OD-H, 5 to 30% *i*PrOH/hexanes gradient over 45 min, 0.7 mL/min, 210 nm): *t*<sub>R</sub>: 21.7 min (minor) and 23.6 min (major).

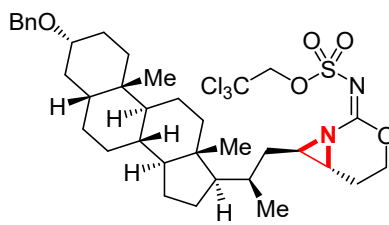

**2n**

**Compound 2n:** The reaction was run on a 0.1 mmol scale. White semisolid, 42.0 mg (58%, *dr* > 20:1). <sup>1</sup>H NMR (500 MHz, CDCl<sub>3</sub>) δ 7.37 – 7.30 (m, 4H), 7.29 – 7.24 (m, 1H), 4.71 (s, 2H), 4.59 – 4.51 (m, 3H), 4.39 (ddd, *J* = 12.7, 10.7, 2.1 Hz, 1H), 3.37 (tt, *J* = 11.1, 4.3 Hz, 1H), 2.76 (ddd, *J* = 9.3, 6.2, 3.5 Hz, 1H), 2.57 – 2.45 (m, 2H), 1.96 (dt, *J* = 12.2, 3.2 Hz, 1H), 1.90 – 1.75 (m, 5H), 1.72 (ddt, *J* = 13.1, 6.5, 3.3 Hz, 1H), 1.67 – 1.61 (m, 1H), 1.57 (qd, *J* = 5.0, 2.9 Hz, 1H), 1.50 – 1.30 (m, 7H), 1.30 – 1.20 (m, 5H), 1.20 – 0.99 (m, 8H), 0.98 – 0.88 (m, 4H), 0.67 (s, 3H). <sup>13</sup>C NMR (126 MHz, CDCl<sub>3</sub>) δ 166.3, 139.1, 128.3, 127.6, 127.4, 93.6, 78.9, 78.6, 69.9, 68.5, 56.5, 56.2, 52.2, 42.9, 42.1, 41.7, 40.3, 40.2, 37.7, 35.8, 35.4, 34.9, 34.6, 33.2, 28.4, 27.3, 27.2, 26.3, 24.7, 24.2, 23.4, 20.8, 18.9, 12.1. HRMS (ESI) *m/z* calculated for C<sub>36</sub>H<sub>51</sub>Cl<sub>3</sub>N<sub>2</sub>O<sub>5</sub>S [M+NH<sub>4</sub>]<sup>+</sup>, 746.2928; found, 746.2917. The *dr* value was determined by <sup>1</sup>H NMR analysis of the crude mixture in comparison with the crude <sup>1</sup>H NMR spectrum of a reaction using an achiral catalyst.

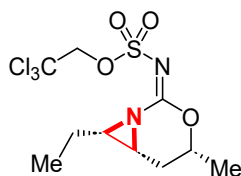

**2o**

**Compound 2o:** The reaction was run on a 0.1 mmol scale. White semisolid, 20.7 mg (57%, 6.4:1 *dr*, major: 71% *ee*). <sup>1</sup>H NMR (500 MHz, CDCl<sub>3</sub>) δ 4.99 – 4.55 (m, 3H), 3.07 (tdd, *J* = 9.2, 6.9, 5.0 Hz, 1H), 3.02 – 2.93 (m, 1H), 2.39 – 2.15 (m, 1H), 2.14 – 2.00 (m, 1H), 1.66 – 1.44 (m, 4H), 1.23 – 1.06 (m, 4H). <sup>13</sup>C NMR (126 MHz, CDCl<sub>3</sub>) δ 164.4, 93.8, 78.7, 76.8, 48.9, 36.3, 24.1, 20.1, 18.8, 10.5. HRMS (ESI) *m/z* calculated for C<sub>10</sub>H<sub>15</sub>Cl<sub>3</sub>N<sub>2</sub>O<sub>4</sub>S [M+H]<sup>+</sup>, 364.9891; found, 364.9889. The *dr* value was determined by <sup>1</sup>H NMR analysis of the crude mixture. Each diastereomer was isolated as a mixture of two NMR-distinguishable, inseparable rotamers. The *ee* value of the major diastereomer was determined by chiral HPLC analysis of **2o** in comparison with a sample of racemic material (CHIRALCEL® OJ-H, 5 to 35% *i*PrOH/hexanes gradient over 45 min, 0.7 mL/min, 210 nm): *t*<sub>R</sub>: 12.1 min (minor) and 12.4 min (major).

The identity of the major diastereomer was determined by NOESY (see Section VI for the NMR spectrum).

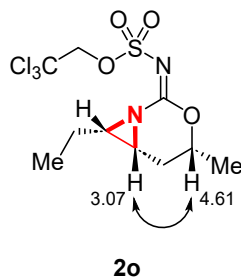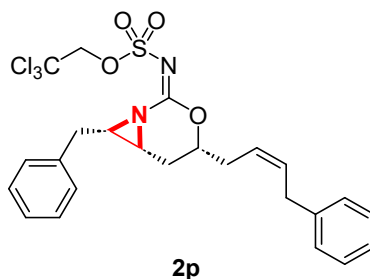

**Compound 2p:** The reaction was run on a 0.1 mmol scale. Off-white solid, 27.7 mg (51%, > 20:1 *dr*, major: 94% *ee*).  $^1\text{H}$  NMR (500 MHz,  $\text{CDCl}_3$ )  $\delta$  7.34 (dd,  $J = 8.1, 6.5$  Hz, 2H), 7.28 (t,  $J = 7.5$  Hz, 3H), 7.23 – 7.14 (m, 5H), 5.93 – 5.83 (m, 1H), 5.62 (tdd,  $J = 10.8, 5.3, 3.7$  Hz, 1H), 4.74 – 4.65 (m, 2H), 4.58 (dtd,  $J = 11.7, 6.0, 2.2$  Hz, 1H), 3.50 – 3.40 (m, 3H), 3.24 (dt,  $J = 9.6, 4.5$  Hz, 1H), 3.11 (ddd,  $J = 9.1, 6.8, 4.9$  Hz, 1H), 2.82 – 2.73 (m, 1H), 2.69 – 2.59 (m, 1H), 2.44 – 2.31 (m, 2H), 1.42 (ddd,  $J = 14.6, 11.3, 9.2$  Hz, 1H).  $^{13}\text{C}$  NMR (126 MHz,  $\text{CDCl}_3$ )  $\delta$  164.0, 140.1, 135.6, 133.1, 129.0, 128.6, 128.4, 128.2, 127.3, 126.2, 122.5, 93.8, 80.1, 78.8, 47.5, 38.1, 33.6, 31.9, 30.8, 24.0. HRMS (ESI)  $m/z$  calculated for  $\text{C}_{24}\text{H}_{25}\text{Cl}_3\text{N}_2\text{O}_4\text{S}$   $[\text{M}+\text{Na}]^+$ , 565.0493; found, 565.0490. The *dr* value was determined by  $^1\text{H}$  NMR analysis of the crude mixture. The *ee* value of the major diastereomer was determined by chiral HPLC analysis of **2p** in comparison with a sample of racemic material (CHIRALCEL® OJ-H, 5 to 35%  $i$ PrOH/hexanes gradient over 50 min, 0.7 mL/min, 210 nm):  $t_{\text{R}}$ : 25.0 min (major) and 34.9 min (minor).

The identity of the major diastereomer was determined by NOESY (see Section VI for the NMR spectrum).

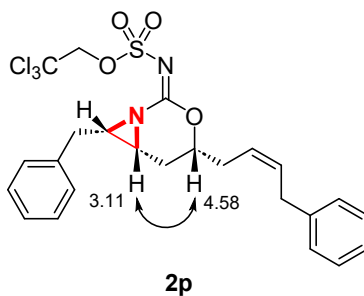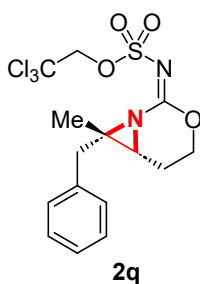

**Compound 2q:** The reaction was run on a 0.1 mmol scale. White solid, 34.2 mg (80%, 96% *ee*).  $^1\text{H}$  NMR (500 MHz,  $\text{CDCl}_3$ )  $\delta$  7.37 – 7.31 (m, 2H), 7.31 – 7.27 (m, 1H), 7.16 (dd,  $J = 7.0, 2.0$  Hz, 2H), 4.75 (s, 2H), 4.63 (ddd,  $J = 10.7, 4.6, 1.7$  Hz, 1H), 4.41 (ddd,  $J = 13.0, 10.6, 2.4$  Hz, 1H), 3.37 (d,  $J = 15.3$  Hz, 1H), 3.03 (dd,  $J = 9.2, 6.9$  Hz, 1H), 2.59 – 2.48 (m, 2H), 1.82 (dddd,  $J = 14.6, 12.4, 9.2, 4.7$  Hz, 1H), 1.41 (s, 3H).  $^{13}\text{C}$  NMR (126 MHz,  $\text{CDCl}_3$ )  $\delta$  163.7, 135.5, 128.9, 128.7, 127.3, 93.8, 78.8, 67.8, 54.1, 45.2, 36.1, 22.3, 20.5. HRMS (ESI)  $m/z$  calculated for  $\text{C}_{15}\text{H}_{17}\text{Cl}_3\text{N}_2\text{O}_4\text{S}$   $[\text{M}+\text{H}]^+$ , 407.0360; found, 407.0354. The *ee* value was determined by chiral HPLC analysis of **2q** in comparison with a sample of racemic material (CHIRALCEL® OD-H, 5 to 30% *i*PrOH/hexanes gradient over 45 min, 0.7 mL/min, 210 nm):  $t_R$ : 23.3 min (minor) and 24.2 min (major).

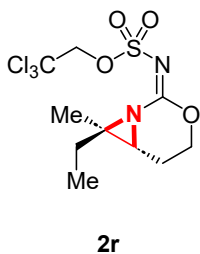

**Compound 2r:** The reaction was run on a 0.1 mmol scale. White semisolid, 22.5 mg (62%, 94% *ee*). <sup>1</sup>H NMR (500 MHz, CDCl<sub>3</sub>) δ 4.70 (d, *J* = 1.5 Hz, 2H), 4.57 (ddd, *J* = 10.7, 4.6, 1.6 Hz, 1H), 4.34 (ddd, *J* = 13.0, 10.6, 2.4 Hz, 1H), 2.90 (dd, *J* = 9.0, 7.0 Hz, 1H), 2.33 (ddt, *J* = 14.8, 7.2, 2.1 Hz, 1H), 1.90 – 1.78 (m, 1H), 1.69 (dt, *J* = 14.2, 7.4 Hz, 1H), 1.65 – 1.56 (m, 1H), 1.34 (s, 3H), 1.01 (t, *J* = 7.5 Hz, 3H). <sup>13</sup>C NMR (126 MHz, CDCl<sub>3</sub>) δ 164.0, 93.8, 78.8, 67.8, 55.4, 43.4, 31.0, 19.4, 14.3, 9.2. HRMS (ESI) *m/z* calculated for C<sub>10</sub>H<sub>15</sub>Cl<sub>3</sub>N<sub>2</sub>O<sub>4</sub>S [M+H]<sup>+</sup>, 364.9891; found, 364.9886. The *ee* value was determined by chiral HPLC analysis of **2r** in comparison with a sample of racemic material (CHIRALCEL® OD-H, 5 to 30% <sup>i</sup>PrOH/hexanes gradient over 45 min, 0.7 mL/min, 210 nm): *t*<sub>R</sub>: 19.1 min (minor) and 20.1 min (major).

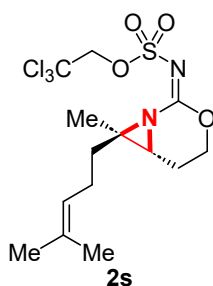

**Compound 2s:** The reaction was run on a 0.1 mmol scale. White solid, 25.2 mg (60%, 95% *ee*). <sup>1</sup>H NMR (500 MHz, CDCl<sub>3</sub>) δ 5.13 – 5.04 (m, 1H), 4.70 (d, *J* = 1.7 Hz, 2H), 4.56 (ddd, *J* = 10.7, 4.7, 1.6 Hz, 1H), 4.33 (ddd, *J* = 12.8, 10.6, 2.5 Hz, 1H), 2.91 (dd, *J* = 9.0, 7.0 Hz, 1H), 2.31 (ddt, *J* = 15.0, 7.2, 2.2 Hz, 1H), 2.13 (q, *J* = 7.6 Hz, 2H), 1.88 (p, *J* = 7.8 Hz, 1H), 1.69 (d, *J* = 1.2 Hz, 3H), 1.67 – 1.54 (m, 5H), 1.35 (s, 3H). <sup>13</sup>C NMR (126 MHz, CDCl<sub>3</sub>) δ 163.9, 132.8, 122.6, 93.8, 78.8, 67.7, 54.4, 44.0, 38.1, 25.7, 23.8, 19.4, 17.7, 14.6. HRMS (ESI) *m/z* calculated for C<sub>14</sub>H<sub>21</sub>Cl<sub>3</sub>N<sub>2</sub>O<sub>4</sub>S [M+H]<sup>+</sup>, 419.0360; found, 419.0358. The *ee* value was determined by chiral HPLC analysis of **2s** in comparison with a sample of racemic material (CHIRALCEL® OJ-H, 5 to 35% <sup>i</sup>PrOH/hexanes gradient over 45 min, 0.7 mL/min, 210 nm): *t*<sub>R</sub>: 11.7 min (minor) and 14.0 min (major).

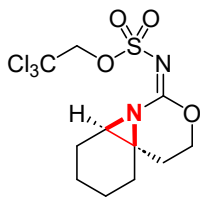

**2t**

**Compound 2t:** The reaction was run on a 0.1 mmol scale. White solid, 31.4 mg (83%, 42% *ee*). <sup>1</sup>H NMR (500 MHz, CDCl<sub>3</sub>) δ 4.71 (s, 2H), 4.50 (ddd, *J* = 10.8, 4.2, 1.8 Hz, 1H), 4.40 (ddd, *J* = 12.8, 10.9, 2.0 Hz, 1H), 2.88 (d, *J* = 4.9 Hz, 1H), 2.44 – 2.32 (m, 1H), 2.25 (dt, *J* = 14.6, 2.0 Hz, 1H), 2.15 (dt, *J* = 14.2, 5.6 Hz, 1H), 1.98 (dq, *J* = 15.8, 5.6 Hz, 1H), 1.75 (ddd, *J* = 14.2, 8.4, 5.7 Hz, 1H), 1.64 – 1.47 (m, 3H), 1.44 (dtd, *J* = 13.5, 6.7, 4.1 Hz, 1H), 1.38 – 1.28 (m, 1H). <sup>13</sup>C NMR (126 MHz, CDCl<sub>3</sub>) δ 167.5, 93.8, 78.8, 67.4, 54.6, 44.0, 32.2, 28.9, 23.3, 19.6, 19.3. HRMS (ESI) *m/z* calculated for C<sub>11</sub>H<sub>15</sub>Cl<sub>3</sub>N<sub>2</sub>O<sub>4</sub>S [M+H]<sup>+</sup>, 376.9891; found, 376.9890. The *ee* value of the major diastereomer was determined by chiral HPLC analysis of **2t** in comparison with a sample of racemic material (CHIRALCEL® OJ-H, 5 to 35% *i*PrOH/hexanes gradient over 45 min, 0.7 mL/min, 210 nm): *t*<sub>R</sub>: 12.7 min (minor) and 13.1 min (major).

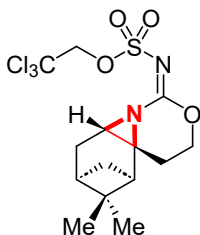

**2u**

**Compound 2u:** The reaction was run on a 0.1 mmol scale. White solid, 40.9 mg (98%, > 20:1 *dr*). <sup>1</sup>H NMR (500 MHz, CDCl<sub>3</sub>) δ 4.73 (d, *J* = 0.8 Hz, 2H), 4.49 (ddd, *J* = 10.7, 4.1, 1.8 Hz, 1H), 4.30 (ddd, *J* = 12.7, 10.7, 2.0 Hz, 1H), 2.98 (d, *J* = 5.7 Hz, 1H), 2.46 (dd, *J* = 15.6, 2.9 Hz, 1H), 2.21 (dt, *J* = 14.5, 2.0 Hz, 1H), 2.17 – 2.08 (m, 3H), 1.89 (tt, *J* = 5.6, 3.1 Hz, 1H), 1.81 – 1.74 (m, 1H), 1.65 (ddd, *J* = 14.4, 12.3, 4.1 Hz, 1H), 1.36 (s, 3H), 1.01 (s, 3H). <sup>13</sup>C NMR (126 MHz, CDCl<sub>3</sub>) δ 166.7, 93.8, 78.8, 67.1, 51.3, 48.2, 44.3,

40.2, 40.0, 30.9, 26.2, 25.8, 25.5, 20.4. HRMS (ESI)  $m/z$  calculated for  $C_{14}H_{19}Cl_3N_2O_4S$   $[M+Na]^+$ , 439.0023; found, 439.0017.

The identity of the major diastereomer was determined by NOESY (see Section VI for the NMR spectrum).

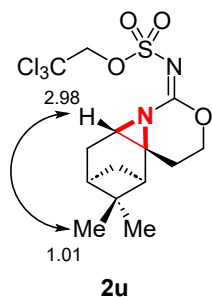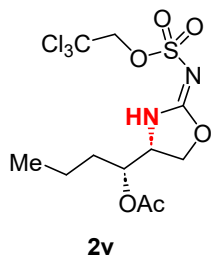

**Compound 2v:** The reaction was run on a 0.1 mmol scale. 79% *ee*.  $^1H$  NMR (500 MHz,  $CDCl_3$ )  $\delta$  7.55 (br s, 1H), 5.02 (dt,  $J = 8.9, 4.3$  Hz, 1H), 4.69 (s, 2H), 4.62 (t,  $J = 9.2$  Hz, 1H), 4.40 (dd,  $J = 9.4, 4.8$  Hz, 1H), 4.24 (dt,  $J = 9.1, 4.7$  Hz, 1H), 2.12 (s, 3H), 1.67 – 1.57 (m, 1H), 1.50 (dddd,  $J = 13.8, 9.5, 6.4, 4.3$  Hz, 1H), 1.44 – 1.30 (m, 2H), 0.95 (t,  $J = 7.3$  Hz, 3H).  $^{13}C$  NMR (126 MHz,  $CDCl_3$ )  $\delta$  170.6, 163.0, 93.6, 78.6, 72.4, 69.3, 57.3, 32.5, 20.8, 18.4, 13.7. HRMS (ESI)  $m/z$  calculated for  $C_{11}H_{17}Cl_3N_2O_6S$   $[M+H]^+$ , 410.9946; found, 410.9943. The *ee* value was determined by chiral HPLC analysis of **2v** in comparison with a sample of racemic material (CHIRALCEL® OD-H, 5 to 30%  $^iPrOH$ /hexanes gradient over 45 min, 0.7 mL/min, 210 nm):  $t_R$ : 20.7 min (major) and 24.5 min (minor).



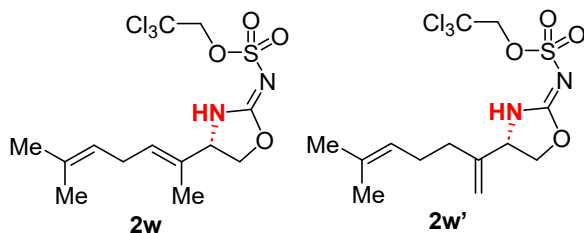

**Compounds 2w and 2w'**: The reaction was run on a 0.1 mmol scale. White solid, 8.40 mg (21% total yield of an inseparable mixture,  $2w:2w' = 1.7:1$ , 49% *ee*). HRMS (ESI)  $m/z$  calculated for  $C_{13}H_{19}Cl_3N_2O_4S$   $[M+Na]^+$ , 427.0023; found, 427.0018. The *ee* value was determined by chiral HPLC analysis of **2w** and **2w'** in comparison with a sample of racemic materials (CHIRALCEL® OD-H, 5 to 30% *i*PrOH/hexanes gradient over 45 min, 0.7 mL/min, 210 nm):  $t_R$ : **2w**: 16.5 min (major) and 18.8 min (minor), **2w'**: 17.8 min (major) and 20.2 min (minor).

Assignments of  $^1H$  and  $^{13}C$  NMR data for **Compounds 2w** and **2w'** were determined using  $^1H$ - $^1H$  COSY,  $^1H$ - $^{13}C$  HSQC, and  $^1H$ - $^{13}C$  HMBC NMR (see Section VI for the NMR spectra).

**Compound 2w**:  $^1H$  NMR (500 MHz,  $CDCl_3$ )  $\delta$  7.32 (s, 1H), 5.50 (t,  $J = 7.3$  Hz, 1H), 5.08 – 4.99 (m, 1H), 4.69 (s, 2H), 4.72 – 4.63 (m, 2H), 4.29 (m, 1H), 2.80 – 2.67 (m, 2H), 1.70 (s, 3H), 1.67 (s, 3H), 1.63 (s, 3H).  $^{13}C$  NMR (126 MHz,  $CDCl_3$ )  $\delta$  163.0, 133.2, 130.9, 129.3, 120.8, 93.7, 78.6, 71.9, 59.6, 26.9, 25.6, 17.8, 11.0.

**Compound 2w'**:  $^1H$  NMR (500 MHz,  $CDCl_3$ )  $\delta$  7.42 (s, 1H), 5.17 (s, 1H), 5.10 (d,  $J = 1.6$  Hz, 1H), 5.08 – 4.99 (m, 1H), 4.70 (s, 2H), 4.68 – 4.58 (m, 2H), 4.29 (m, 1H), 2.18 (q,  $J = 7.4$  Hz, 2H), 2.04 (m, 2H), 1.70 (s, 3H), 1.62 (s, 3H).  $^{13}C$  NMR (126 MHz,  $CDCl_3$ )  $\delta$  163.0, 144.3, 133.3, 122.6, 113.8, 93.7, 78.6, 71.0, 62.1, 31.0, 25.9, 25.6, 17.8.

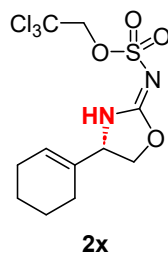

**Compound 2x:** The reaction was run on a 0.1 mmol scale. White solid, 13.8 mg (37%, 67% *ee*). <sup>1</sup>H NMR (500 MHz, CDCl<sub>3</sub>) δ 7.31 (s, 1H), 5.81 (tt, *J* = 3.6, 1.7 Hz, 1H), 4.70 (s, 2H), 4.64 (t, *J* = 8.9 Hz, 1H), 4.57 (dd, *J* = 9.2, 6.1 Hz, 1H), 4.31 (dd, *J* = 8.7, 6.1 Hz, 1H), 2.06 (ddd, *J* = 8.5, 5.9, 3.3 Hz, 2H), 2.01 – 1.88 (m, 2H), 1.75 – 1.57 (m, 4H). <sup>13</sup>C NMR (126 MHz, CDCl<sub>3</sub>) δ 163.0, 132.7, 128.3, 93.7, 78.6, 71.1, 60.9, 24.9, 22.9, 22.0, 21.9. HRMS (ESI) *m/z* calculated for C<sub>11</sub>H<sub>15</sub>Cl<sub>3</sub>N<sub>2</sub>O<sub>4</sub>S [M+Na]<sup>+</sup>, 398.9710; found, 398.9704. The *ee* value of the major diastereomer was determined by chiral HPLC analysis of **2y** in comparison with a sample of racemic material (CHIRALCEL® OD-H, 5 to 30% *i*PrOH/hexanes gradient over 45 min, 0.7 mL/min, 210 nm): *t*<sub>R</sub>: 17.8 min (major) and 19.6 min (minor).

#### IV. Post-Functionalization of Enantioenriched Bicyclic Aziridines

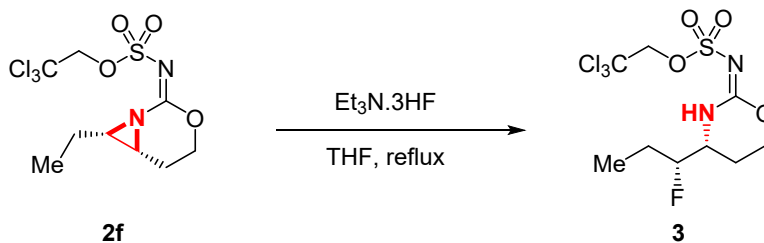

**Compound 3:** To a solution of aziridine **2f** (35.2 mg, 0.1 mmol, 1 equiv.) in 1 mL of anhydrous THF at rt was added 3HF·Et<sub>3</sub>N (33 μL, 0.2 mmol, 2 equiv.). The reaction was heated under reflux overnight. The reaction mixture was diluted with water (5 mL) and EtOAc (5 mL). The aqueous layer was extracted with EtOAc three times. The combined organic phases were dried over Na<sub>2</sub>SO<sub>4</sub> and concentrated under reduced pressure. The crude product was purified by silica gel column chromatography using a gradient of CH<sub>2</sub>Cl<sub>2</sub>/EtOAc mixtures (25:1 to 5:1). The product was obtained in 58% yield (21.4 mg, white solid). <sup>1</sup>H NMR

(500 MHz, CDCl<sub>3</sub>) δ 7.76 (s, 1H), 4.68 (s, 2H), 4.56 (dtd, *J* = 11.3, 4.3, 1.4 Hz, 1H), 4.40 – 4.22 (m, 2H), 3.74 – 3.62 (m, 1H), 2.16 – 2.08 (m, 1H), 1.91 (dtd, *J* = 14.2, 10.1, 4.2 Hz, 1H), 1.78 – 1.64 (m, 2H), 1.08 (t, *J* = 7.4 Hz, 3H). <sup>13</sup>C NMR (126 MHz, CDCl<sub>3</sub>) δ 158.0, 96.3, 95.6 (d), 78.4, 66.0 (d), 52.7 (d), 24.3 (d), 22.7 (d), 8.9 (d). <sup>19</sup>F NMR (377 MHz, CDCl<sub>3</sub>) δ -192.6 (s). HRMS (ESI) *m/z* calculated for C<sub>9</sub>H<sub>14</sub>Cl<sub>3</sub>FN<sub>2</sub>O<sub>4</sub>S [M+H]<sup>+</sup>, 370.9797; found, 370.9798.

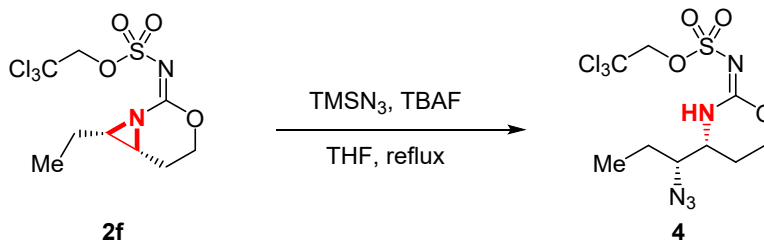

**Compound 4:** To a solution of aziridine **2f** (35.2 mg, 0.1 mmol, 1 equiv.) in 1 mL of anhydrous THF under N<sub>2</sub> atmosphere at 0 °C were added 1 M TBAF solution in THF (10 μL, 0.01 mmol, 0.1 equiv.) and TMSN<sub>3</sub> (14.6 μL, 0.11 mmol, 1.1 equiv.). The reaction was heated under reflux overnight. The reaction mixture was then concentrated under reduced pressure. The crude product was purified by silica gel column chromatography using a gradient of CH<sub>2</sub>Cl<sub>2</sub>/EtOAc mixtures (25:1  $\times$  5:1). The product was obtained in 61% yield (23.9 mg, white solid). <sup>1</sup>H NMR (500 MHz, CDCl<sub>3</sub>) δ 7.87 (s, 1H), 4.68 (s, 2H), 4.57 (dt, *J* = 11.4, 4.0 Hz, 1H), 4.35 (td, *J* = 11.3, 2.7 Hz, 1H), 3.51 (tt, *J* = 11.1, 5.7 Hz, 1H), 3.33 (td, *J* = 8.0, 3.9 Hz, 1H), 2.22 – 2.11 (m, 1H), 1.92 (dtd, *J* = 14.3, 10.4, 4.1 Hz, 1H), 1.82 (dq, *J* = 14.7, 7.4, 3.7 Hz, 1H), 1.68 (dp, *J* = 14.9, 7.5 Hz, 1H), 1.12 (t, *J* = 7.4 Hz, 3H). <sup>13</sup>C NMR (126 MHz, CDCl<sub>3</sub>) δ 158.3, 94.0, 78.4, 66.8, 66.3, 52.2, 23.9, 23.8, 9.9. HRMS (ESI) *m/z* calculated for C<sub>9</sub>H<sub>14</sub>Cl<sub>3</sub>N<sub>5</sub>O<sub>4</sub>S [M+H]<sup>+</sup>, 393.9905; found, 393.9906.

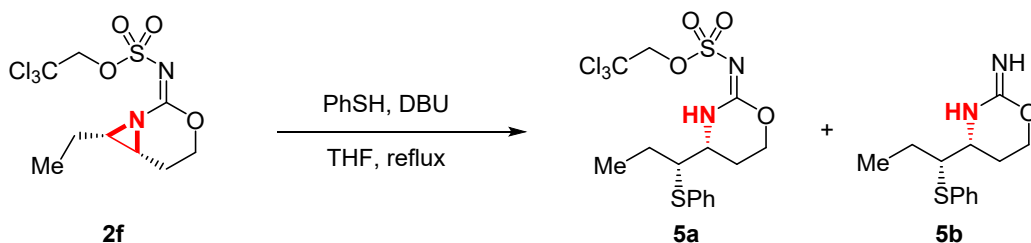

**Compounds 5a and 5b:** To a solution of aziridine **2f** (35.2 mg, 0.1 mmol, 1 equiv.) in 1 mL of anhydrous THF at rt were added PhSH (12  $\mu$ L, 0.12 mmol, 1.2 equiv.) and DBU (16  $\mu$ L, 0.11 mmol, 1.1 equiv.). The reaction was heated under reflux for 2 h. The reaction mixture was then concentrated under reduced pressure. The crude product was purified by silica gel column chromatography using a gradient of CH<sub>2</sub>Cl<sub>2</sub>/EtOAc mixtures (25:1  $\times$  5:1). The products **5a** and **5b** were obtained in 21% yield (9.8 mg, white solid) and 79% yield (19.9 mg, white solid), respectively.

**Compound 5a:** <sup>1</sup>H NMR (500 MHz, CDCl<sub>3</sub>)  $\delta$  8.27 (s, 1H), 7.52 – 7.45 (m, 2H), 7.35 (dt,  $J$  = 4.6, 3.0 Hz, 3H), 4.69 (s, 2H), 4.54 (ddd,  $J$  = 11.4, 4.4, 2.8 Hz, 1H), 4.26 (td,  $J$  = 11.7, 2.5 Hz, 1H), 3.43 (ddd,  $J$  = 10.9, 8.3, 4.9 Hz, 1H), 2.82 – 2.74 (m, 1H), 2.27 – 2.18 (m, 1H), 1.91 (dddd,  $J$  = 14.7, 12.0, 10.6, 4.4 Hz, 1H), 1.78 (dq,  $J$  = 14.6, 7.3, 3.5 Hz, 1H), 1.47 (ddq,  $J$  = 14.3, 9.6, 7.2 Hz, 1H), 1.20 (t,  $J$  = 7.2 Hz, 3H). <sup>13</sup>C NMR (126 MHz, CDCl<sub>3</sub>)  $\delta$  158.2, 134.2, 131.4, 129.4, 128.7, 94.1, 78.4, 66.8, 56.6, 52.4, 24.7, 23.1, 11.4. HRMS (ESI)  $m/z$  calculated for C<sub>15</sub>H<sub>19</sub>Cl<sub>3</sub>N<sub>2</sub>O<sub>4</sub>S<sub>2</sub> [M+H]<sup>+</sup>, 460.9925; found, 460.9925.

**Compound 5b:** <sup>1</sup>H NMR (500 MHz, CDCl<sub>3</sub>)  $\delta$  8.18 (s, 1H), 7.53 – 7.46 (m, 2H), 7.38 – 7.32 (m, 3H), 7.12 (s, 1H), 4.57 (ddd,  $J$  = 11.4, 4.3, 2.7 Hz, 1H), 4.29 (td,  $J$  = 11.8, 2.5 Hz, 1H), 3.42 (ddd,  $J$  = 10.6, 8.5, 4.9 Hz, 1H), 2.76 (ddd,  $J$  = 9.8, 8.6, 3.5 Hz, 1H), 2.28 – 2.19 (m, 1H), 1.93 (dddd,  $J$  = 14.7, 12.2, 10.6, 4.4 Hz, 1H), 1.78 (dq,  $J$  = 14.5, 7.3, 3.5 Hz, 1H), 1.48 (ddq,  $J$  = 14.3, 9.7, 7.3 Hz, 1H), 1.21 (t,  $J$  = 7.2 Hz, 3H). <sup>13</sup>C NMR (126 MHz, CDCl<sub>3</sub>)  $\delta$  158.3, 134.9, 134.3, 129.5, 128.8, 67.0, 56.6, 52.4, 24.8, 23.1, 11.3.

## V. X-ray Crystallographic Data of Compound 2a.

### 1. Data Collection for CDC deposition number 2279283

A colorless crystal with approximate dimensions  $0.22 \times 0.16 \times 0.12 \text{ mm}^3$  was selected under oil under ambient conditions and attached to the tip of a MiTeGen MicroMount©. The crystal was mounted in a stream of cold nitrogen at 100(1) K and centered in the X-ray beam by using a video camera.

The crystal evaluation and data collection were performed on a Bruker Quazar SMART APEXII diffractometer with Mo  $K_\alpha$  ( $\lambda = 0.71073 \text{ \AA}$ ) radiation and the detector to crystal distance of 4.96 cm.<sup>10</sup>

The initial cell constants were obtained from one  $180^\circ \omega$  scan with frames collected at  $1^\circ$  intervals with the exposure time of 1 seconds per frame. The reflections were successfully indexed by an automated indexing routine built in the APEX3 program suite. The final cell constants were calculated from a set of 9766 strong reflections from the actual data collection.

The data were collected by using the full sphere data collection routine to survey the reciprocal space to the extent of a full sphere to a resolution of  $0.67 \text{ \AA}$ . A total of 54085 data were harvested by collecting 6 sets of frames with  $0.4^\circ$  scans in  $\omega$  and  $\phi$  with exposure times of 10 sec per frame. These highly redundant datasets were corrected for Lorentz and polarization effects. The absorption correction was based on fitting a function to the empirical transmission surface as sampled by multiple equivalent measurements.<sup>11</sup>

### 2. Structure Solution and Refinement

The systematic absences in the diffraction data were consistent for the space groups  $P2_1$  and  $P2_1/m$ . The  $E$ -statistics strongly suggested the non-centrosymmetric space group  $P2_1$  that yielded chemically reasonable and computationally stable results of refinement.<sup>12-17</sup>

A successful solution by intrinsic phasing provided most non-hydrogen atoms from the  $E$ -map. The remaining non-hydrogen atoms were located in an alternating series of least-squares cycles and difference

Fourier maps. All non-hydrogen atoms were refined with anisotropic displacement coefficients unless indicated otherwise. All hydrogen atoms were included in the structure factor calculation at idealized positions and were allowed to ride on the neighboring atoms with relative isotropic displacement coefficients.

There are two symmetry-independent molecules with identical compositions but slightly different conformations in the asymmetric unit. There is positional disorder in the **2a** molecule: atoms C11a, C12a, C1a, C2a, O1a, S1a, O2a, O3a are disordered over two positions with the major component contribution of 92.1(2) %. The minor disorder components were refined isotropically with geometrical restraints.

The absolute structure was unambiguously established by resonant scattering effects. The absolute configuration is assigned as follows: atoms C6 and C6a are *R*; atoms C7 and C7a are *S*. The crystal may contain 0.029(10) % of the other enantiomer.

The final least-squares refinement of 466 parameters against 11914 data resulted in residuals *R* (based on  $F^2$  for  $I \geq 2\sigma$ ) and  $wR$  (based on  $F^2$  for all data) of 0.0231 and 0.0584, respectively. The final difference Fourier map was featureless.

### 3. Summary

**Crystal Data** for  $C_{14}H_{15}Cl_3N_2O_4S$  ( $M=413.69$  g/mol): monoclinic, space group  $P2_1$  (no. 4),  $a = 11.978(3)$  Å,  $b = 9.923(3)$  Å,  $c = 14.449(4)$  Å,  $\beta = 96.646(13)^\circ$ ,  $V = 1705.8(8)$  Å<sup>3</sup>,  $Z = 4$ ,  $T = 100$  K,  $\mu(\text{Mo K}\alpha) = 0.681$  mm<sup>-1</sup>,  $D_{\text{calc}} = 1.611$  g/cm<sup>3</sup>, 54085 reflections measured ( $2.838^\circ \leq 2\Theta \leq 64.316^\circ$ ), 11914 unique ( $R_{\text{int}} = 0.0315$ ,  $R_{\text{sigma}} = 0.0247$ ) which were used in all calculations. The final  $R_1$  was 0.0231 ( $I > 2\sigma(I)$ ) and  $wR_2$  was 0.0584 (all data).

### 4. Acknowledgement

The Bruker Quazar APEX2 was purchased by the UW–Madison Department of Chemistry with a portion of a generous gift from Paul J. and Margaret M. Bender.

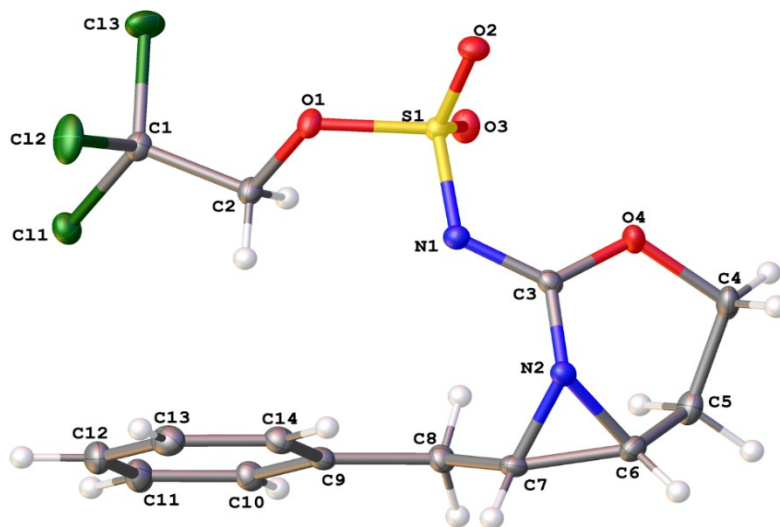

**Figure S1.** A molecular drawing of the first symmetry-independent molecule of **2a** shown with 50% probability ellipsoids.

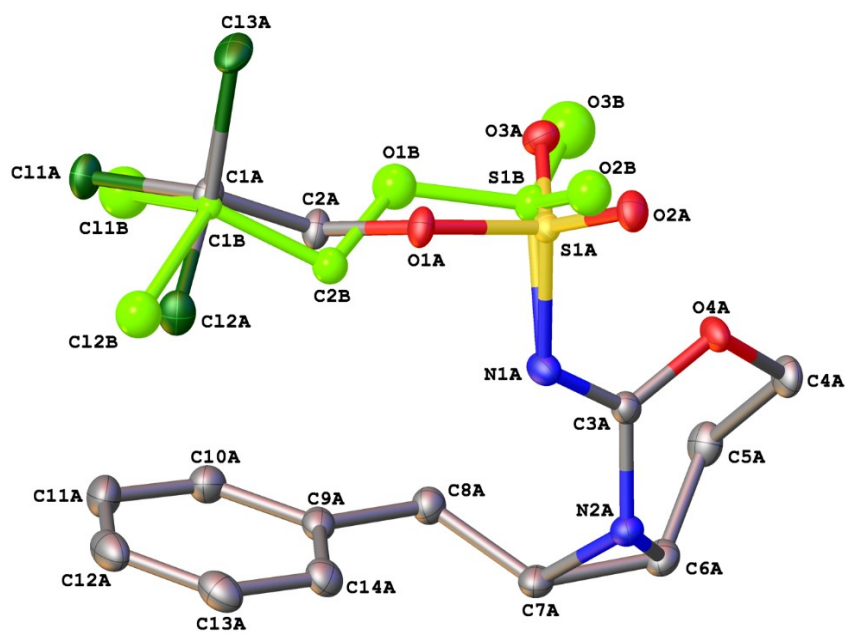

**Figure S2.** A molecular drawing of the second symmetry-independent molecule of **2a** shown with 50% probability ellipsoids. All H atoms are omitted. The portion colored green highlights the disordered atoms.

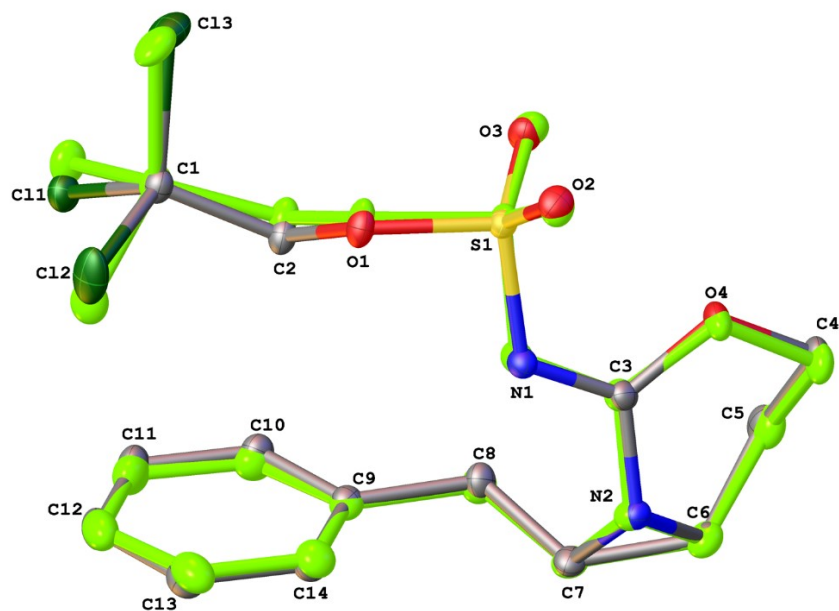

**Figure S3.** A molecular drawing of a superposition of the two symmetry-independent molecules of **2a** shown with 50% probability ellipsoids. The minor disorder component atoms and H atoms are omitted. Molecule **2a** is colored green.

**Table S1.** Crystal data and structure refinement for **2a**.

|                     |                                                                                 |
|---------------------|---------------------------------------------------------------------------------|
| Identification code | Schomaker100                                                                    |
| Empirical formula   | C <sub>14</sub> H <sub>15</sub> Cl <sub>3</sub> N <sub>2</sub> O <sub>4</sub> S |
| Formula weight      | 413.69                                                                          |
| Temperature/K       | 100                                                                             |
| Crystal system      | monoclinic                                                                      |
| Space group         | P2 <sub>1</sub>                                                                 |
| a/Å                 | 11.978(3)                                                                       |
| b/Å                 | 9.923(3)                                                                        |
| c/Å                 | 14.449(4)                                                                       |
| α/°                 | 90                                                                              |
| β/°                 | 96.646(13)                                                                      |
| γ/°                 | 90                                                                              |



|                                             |                                                                |
|---------------------------------------------|----------------------------------------------------------------|
| Volume/Å <sup>3</sup>                       | 1705.8(8)                                                      |
| Z                                           | 4                                                              |
| ρ <sub>calc</sub> /cm <sup>3</sup>          | 1.611                                                          |
| μ/mm <sup>-1</sup>                          | 0.681                                                          |
| F(000)                                      | 848.0                                                          |
| Crystal size/mm <sup>3</sup>                | 0.22 × 0.16 × 0.12                                             |
| Radiation                                   | Mo Kα (λ = 0.71073)                                            |
| 2θ range for data collection/°              | 2.838 to 64.316                                                |
| Index ranges                                | -17 ≤ h ≤ 17, -14 ≤ k ≤ 14, -21 ≤ l ≤ 21                       |
| Reflections collected                       | 54085                                                          |
| Independent reflections                     | 11914 [R <sub>int</sub> = 0.0315, R <sub>sigma</sub> = 0.0247] |
| Data/restraints/parameters                  | 11914/24/466                                                   |
| Goodness-of-fit on F <sup>2</sup>           | 1.057                                                          |
| Final R indexes [I ≥ 2σ (I)]                | R <sub>1</sub> = 0.0231, wR <sub>2</sub> = 0.0577              |
| Final R indexes [all data]                  | R <sub>1</sub> = 0.0241, wR <sub>2</sub> = 0.0584              |
| Largest diff. peak/hole / e Å <sup>-3</sup> | 0.55/-0.25                                                     |
| Flack parameter                             | 0.026(9)                                                       |

**Table S2.** Fractional Atomic Coordinates (×10<sup>4</sup>) and Equivalent Isotropic Displacement Parameters (Å<sup>2</sup>×10<sup>3</sup>) for **2a**. U<sub>eq</sub> is defined as 1/3 of the trace of the orthogonalised U<sub>ij</sub> tensor.

| Atom | x         | y          | z         | U(eq)     |
|------|-----------|------------|-----------|-----------|
| Cl1  | 6153.6(3) | 3430.6(4)  | 5861.8(3) | 17.45(7)  |
| Cl2  | 5736.7(4) | 6146.3(4)  | 5214.5(4) | 27.24(10) |
| Cl3  | 5594.4(4) | 3963.2(5)  | 3891.8(3) | 24.92(9)  |
| S1   | 8839.6(3) | 5448.4(4)  | 3668.2(2) | 11.30(6)  |
| O1   | 7708.9(9) | 5603.7(12) | 4126.4(8) | 14.3(2)   |

| <b>Atom</b> | <b>x</b>    | <b>y</b>   | <b>z</b>   | <b>U(eq)</b> |
|-------------|-------------|------------|------------|--------------|
| O2          | 8702.6(10)  | 6353.8(12) | 2895.4(8)  | 15.7(2)      |
| O3          | 9004.6(10)  | 4047.0(12) | 3486.1(9)  | 16.4(2)      |
| O4          | 11219.4(9)  | 5277.0(13) | 3807.6(8)  | 16.3(2)      |
| N1          | 9705.5(11)  | 6031.2(13) | 4509.7(9)  | 12.8(2)      |
| N2          | 11491.7(11) | 6382.2(13) | 5234.2(9)  | 12.2(2)      |
| C1          | 6317.1(13)  | 4577.8(16) | 4946.9(11) | 14.3(3)      |
| C2          | 7569.2(12)  | 4700.8(16) | 4883.6(11) | 13.8(3)      |
| C3          | 10785.1(12) | 5862.7(15) | 4511.4(10) | 11.7(2)      |
| C4          | 12410.8(13) | 4879.1(18) | 3953.2(12) | 17.6(3)      |
| C5          | 12709.1(14) | 4411.7(17) | 4953.2(12) | 18.5(3)      |
| C6          | 12522.7(12) | 5609.6(16) | 5556.5(10) | 14.7(3)      |
| C7          | 11602.4(12) | 5714.5(15) | 6166.2(10) | 13.6(3)      |
| C8          | 10878.7(13) | 4525.6(16) | 6344.6(11) | 14.4(3)      |
| C9          | 9851.5(13)  | 4856.8(15) | 6821.6(10) | 12.6(2)      |
| C10         | 9290.1(13)  | 3792.7(16) | 7209.1(11) | 15.6(3)      |
| C11         | 8334.5(14)  | 4025.9(18) | 7647.3(12) | 18.8(3)      |
| C12         | 7925.6(14)  | 5333.8(18) | 7706.4(12) | 19.5(3)      |
| C13         | 8477.1(15)  | 6395.2(18) | 7328.7(11) | 19.1(3)      |
| C14         | 9432.3(14)  | 6162.2(17) | 6882.1(11) | 15.6(3)      |
| Cl1A        | 6607.3(6)   | 3667.1(5)  | -414.3(3)  | 19.00(11)    |
| Cl2A        | 6399.9(6)   | 6566.7(5)  | -275.6(4)  | 20.06(11)    |
| Cl3A        | 7211.8(3)   | 5007.2(5)  | 1340.8(3)  | 23.17(9)     |
| S1A         | 3733.4(3)   | 5446.9(7)  | 1691.8(3)  | 11.91(11)    |
| O1A         | 4822.5(10)  | 5738.7(13) | 1196.8(9)  | 14.9(2)      |
| O2A         | 3765.7(11)  | 6458.4(16) | 2398.1(9)  | 17.7(3)      |

| <b>Atom</b> | <b>x</b>   | <b>y</b>   | <b>z</b>    | <b>U(eq)</b> |
|-------------|------------|------------|-------------|--------------|
| O3A         | 3737.6(12) | 4053.9(15) | 1954.4(10)  | 17.7(3)      |
| N1A         | 2794.1(11) | 5767.6(14) | 825.5(9)    | 15.8(2)      |
| C1A         | 6268.8(15) | 5006(3)    | 304.2(12)   | 14.0(4)      |
| C2A         | 5068.6(13) | 4772.6(18) | 509.0(12)   | 15.0(3)      |
| Cl1B        | 6232(9)    | 3744(9)    | -329(6)     | 34(2)        |
| Cl2B        | 6694(8)    | 6609(8)    | -448(6)     | 27.6(19)     |
| S1B         | 3735(5)    | 4917(9)    | 1668(4)     | 18.4(15)     |
| O1B         | 4749(11)   | 4634(15)   | 1106(10)    | 26(4)        |
| O2B         | 4031(16)   | 6085(16)   | 2244(12)    | 26(5)        |
| O3B         | 3420(19)   | 3712(17)   | 2050(16)    | 41(6)        |
| C1B         | 6310(11)   | 5289(14)   | 290(8)      | 7(7)         |
| C2B         | 5127(11)   | 5622(16)   | 512(11)     | 17(4)        |
| O4A         | 1391.3(9)  | 5015.9(13) | 1654.9(8)   | 16.5(2)      |
| N2A         | 951.8(11)  | 5886.7(14) | 164.0(9)    | 15.0(2)      |
| C3A         | 1741.0(12) | 5521.7(16) | 884.1(10)   | 13.1(2)      |
| C4A         | 243.8(13)  | 4493.9(18) | 1585.5(12)  | 18.5(3)      |
| C5A         | -41.7(14)  | 3836.9(18) | 637.9(12)   | 19.3(3)      |
| C6A         | -20.0(14)  | 4963.4(18) | -55.0(12)   | 18.0(3)      |
| C7A         | 818.5(13)  | 5135.0(18) | -735.1(11)  | 17.1(3)      |
| C8A         | 1652.5(14) | 4078.4(18) | -944.4(11)  | 17.4(3)      |
| C9A         | 2615.0(14) | 4614.8(17) | -1441.6(11) | 16.6(3)      |
| C10A        | 3263.3(15) | 3696.3(19) | -1875.5(12) | 21.4(3)      |
| C11A        | 4166.5(16) | 4124(2)    | -2324.0(13) | 26.1(4)      |
| C12A        | 4420.4(15) | 5490(2)    | -2358.0(12) | 25.7(4)      |
| C13A        | 3770.9(16) | 6413(2)    | -1936.1(12) | 23.7(3)      |

| Atom | x          | y          | z           | U(eq)   |
|------|------------|------------|-------------|---------|
| C14A | 2876.6(15) | 5976.2(19) | -1473.9(12) | 19.7(3) |

**Table S3.** Anisotropic Displacement Parameters ( $\text{\AA}^2 \times 10^3$ ) for **2a**. The Anisotropic displacement factor exponent takes the form:  $-2\pi^2[h^2a^*U_{11}+2hka^*b^*U_{12}+\dots]$ .

| Atom | $U_{11}$  | $U_{22}$  | $U_{33}$  | $U_{23}$ | $U_{13}$  | $U_{12}$   |
|------|-----------|-----------|-----------|----------|-----------|------------|
| Cl1  | 17.76(16) | 18.39(16) | 16.98(16) | 1.55(12) | 5.34(13)  | -2.41(13)  |
| Cl2  | 22.67(19) | 17.30(17) | 44.7(3)   | 2.72(17) | 16.57(18) | 6.61(14)   |
| Cl3  | 21.10(18) | 33.8(2)   | 18.47(17) | 2.92(16) | -3.40(14) | -11.05(16) |
| S1   | 10.56(14) | 11.99(14) | 11.41(14) | 0.24(11) | 1.44(11)  | -0.39(12)  |
| O1   | 10.6(4)   | 14.8(5)   | 18.0(5)   | 3.6(4)   | 3.8(4)    | 1.4(4)     |
| O2   | 15.7(5)   | 18.2(5)   | 12.6(5)   | 3.0(4)   | -0.1(4)   | -1.1(4)    |
| O3   | 16.6(5)   | 13.0(5)   | 20.5(5)   | -2.6(4)  | 5.3(4)    | -0.8(4)    |
| O4   | 11.8(5)   | 24.7(6)   | 13.1(5)   | -4.1(4)  | 4.4(4)    | -1.4(4)    |
| N1   | 12.1(5)   | 15.2(5)   | 11.2(5)   | -0.5(4)  | 1.1(4)    | 0.2(4)     |
| N2   | 12.1(5)   | 13.5(5)   | 11.0(5)   | 0.0(4)   | 1.8(4)    | -2.2(4)    |
| C1   | 12.6(6)   | 14.0(6)   | 16.8(7)   | 0.6(5)   | 2.9(5)    | 0.0(5)     |
| C2   | 10.9(6)   | 15.8(6)   | 15.0(6)   | 2.8(5)   | 3.0(5)    | 0.3(5)     |
| C3   | 13.1(6)   | 12.4(6)   | 10.0(6)   | 0.6(4)   | 2.4(5)    | -1.3(5)    |
| C4   | 12.1(6)   | 23.1(8)   | 18.8(7)   | -4.6(6)  | 6.4(5)    | -1.6(5)    |
| C5   | 13.0(7)   | 20.3(7)   | 22.9(8)   | -0.3(6)  | 5.3(6)    | 1.8(5)     |
| C6   | 10.4(6)   | 18.6(7)   | 14.9(6)   | 1.5(5)   | 0.3(5)    | -1.6(5)    |
| C7   | 13.2(6)   | 17.2(7)   | 9.8(6)    | 0.7(5)   | -0.5(5)   | -1.2(5)    |
| C8   | 14.6(6)   | 15.3(6)   | 13.8(6)   | 2.4(5)   | 3.7(5)    | -0.4(5)    |
| C9   | 13.6(6)   | 14.5(6)   | 9.7(6)    | 1.1(5)   | 0.8(5)    | -0.8(5)    |
| C10  | 16.5(7)   | 15.1(6)   | 15.6(6)   | 0.9(5)   | 3.5(5)    | -2.0(5)    |

| Atom | $U_{11}$  | $U_{22}$  | $U_{33}$  | $U_{23}$  | $U_{13}$  | $U_{12}$  |
|------|-----------|-----------|-----------|-----------|-----------|-----------|
| C11  | 17.5(7)   | 20.9(7)   | 18.9(7)   | 1.8(6)    | 6.0(6)    | -3.1(6)   |
| C12  | 15.8(7)   | 25.0(8)   | 18.7(7)   | -0.2(6)   | 5.6(5)    | 1.7(6)    |
| C13  | 19.5(7)   | 19.4(7)   | 18.2(7)   | 0.4(6)    | 1.6(6)    | 3.3(6)    |
| C14  | 17.4(7)   | 15.8(6)   | 13.7(6)   | 1.5(5)    | 1.8(5)    | -0.6(5)   |
| Cl1A | 19.7(3)   | 17.0(2)   | 21.2(2)   | -6.21(14) | 5.99(18)  | 0.91(16)  |
| Cl2A | 21.8(3)   | 15.46(19) | 23.7(2)   | -1.28(15) | 6.1(2)    | -2.43(16) |
| Cl3A | 13.00(16) | 35.2(2)   | 19.96(17) | -6.23(16) | -3.93(13) | 4.74(15)  |
| S1A  | 9.64(17)  | 15.1(3)   | 11.00(17) | -0.09(15) | 1.29(12)  | -0.64(14) |
| O1A  | 10.5(5)   | 17.7(6)   | 17.1(6)   | -4.5(4)   | 4.5(4)    | -1.7(4)   |
| O2A  | 16.5(6)   | 22.0(7)   | 14.9(6)   | -5.2(5)   | 2.8(5)    | -0.9(5)   |
| O3A  | 16.1(6)   | 17.3(6)   | 19.4(6)   | 2.1(5)    | 1.5(5)    | 1.8(5)    |
| N1A  | 12.6(6)   | 21.2(6)   | 13.4(5)   | 2.1(5)    | 0.5(4)    | -2.2(5)   |
| C1A  | 11.8(9)   | 14.3(9)   | 15.9(10)  | -4.0(6)   | 1.5(5)    | -0.3(6)   |
| C2A  | 11.3(7)   | 18.2(8)   | 15.8(7)   | -5.7(6)   | 3.0(5)    | -1.6(6)   |
| O4A  | 11.6(5)   | 26.0(6)   | 12.3(5)   | 2.9(4)    | 3.0(4)    | -2.2(4)   |
| N2A  | 13.1(6)   | 17.5(6)   | 14.1(6)   | 0.8(4)    | 0.1(4)    | 1.3(5)    |
| C3A  | 13.6(6)   | 13.7(6)   | 12.1(6)   | -1.0(5)   | 1.7(5)    | 0.0(5)    |
| C4A  | 12.0(6)   | 25.7(8)   | 18.6(7)   | 0.4(6)    | 5.3(6)    | -3.3(6)   |
| C5A  | 14.6(7)   | 20.4(7)   | 23.6(8)   | -2.5(6)   | 4.6(6)    | -3.8(6)   |
| C6A  | 12.7(6)   | 23.5(7)   | 17.3(7)   | -2.2(6)   | -0.7(5)   | 0.1(6)    |
| C7A  | 14.9(6)   | 22.1(7)   | 13.7(6)   | -0.3(5)   | -1.2(5)   | 2.5(5)    |
| C8A  | 16.9(7)   | 19.5(7)   | 15.9(7)   | -1.5(6)   | 2.1(5)    | 0.7(6)    |
| C9A  | 14.0(6)   | 23.2(7)   | 12.1(6)   | -1.4(5)   | -0.3(5)   | 1.3(6)    |
| C10A | 22.1(8)   | 23.6(8)   | 18.5(7)   | 1.2(6)    | 2.6(6)    | 4.5(6)    |
| C11A | 21.6(8)   | 36.2(10)  | 21.5(8)   | 1.6(7)    | 6.3(6)    | 8.4(7)    |

| Atom | $U_{11}$ | $U_{22}$ | $U_{33}$ | $U_{23}$ | $U_{13}$ | $U_{12}$ |
|------|----------|----------|----------|----------|----------|----------|
| C12A | 16.9(7)  | 41.8(10) | 18.6(7)  | 5.4(8)   | 2.3(6)   | -1.8(7)  |
| C13A | 24.0(8)  | 29.6(9)  | 16.8(7)  | 1.9(6)   | -0.9(6)  | -6.3(7)  |
| C14A | 21.2(8)  | 24.1(8)  | 13.5(7)  | -2.2(6)  | 0.5(6)   | 0.0(6)   |

**Table S4.** Bond Lengths for **2a**.

| Atom | Atom | Length/Å   | Atom | Atom | Length/Å   |
|------|------|------------|------|------|------------|
| Cl1  | C1   | 1.7724(17) | S1A  | O2A  | 1.4287(16) |
| Cl2  | C1   | 1.7656(17) | S1A  | O3A  | 1.4333(16) |
| Cl3  | C1   | 1.7719(17) | S1A  | N1A  | 1.6148(14) |
| S1   | O1   | 1.5824(12) | O1A  | C2A  | 1.436(2)   |
| S1   | O2   | 1.4278(12) | N1A  | S1B  | 1.774(6)   |
| S1   | O3   | 1.4332(13) | N1A  | C3A  | 1.297(2)   |
| S1   | N1   | 1.6114(14) | C1A  | C2A  | 1.519(3)   |
| O1   | C2   | 1.4387(19) | Cl1B | C1B  | 1.772(12)  |
| O4   | C3   | 1.3285(18) | Cl2B | C1B  | 1.783(12)  |
| O4   | C4   | 1.4721(19) | S1B  | O1B  | 1.563(10)  |
| N1   | C3   | 1.3036(19) | S1B  | O2B  | 1.447(11)  |
| N2   | C3   | 1.3668(19) | S1B  | O3B  | 1.387(11)  |
| N2   | C6   | 1.482(2)   | O1B  | C2B  | 1.411(12)  |
| N2   | C7   | 1.4929(19) | C1B  | C2B  | 1.525(12)  |
| C1   | C2   | 1.518(2)   | O4A  | C3A  | 1.3325(18) |
| C4   | C5   | 1.520(2)   | O4A  | C4A  | 1.4615(19) |
| C5   | C6   | 1.506(2)   | N2A  | C3A  | 1.3710(19) |
| C6   | C7   | 1.492(2)   | N2A  | C6A  | 1.486(2)   |
| C7   | C8   | 1.504(2)   | N2A  | C7A  | 1.491(2)   |

| Atom Atom Length/Å |     |            | Atom Atom Length/Å |      |          |
|--------------------|-----|------------|--------------------|------|----------|
| C8                 | C9  | 1.514(2)   | C4A                | C5A  | 1.519(2) |
| C9                 | C10 | 1.403(2)   | C5A                | C6A  | 1.503(2) |
| C9                 | C14 | 1.396(2)   | C6A                | C7A  | 1.494(2) |
| C10                | C11 | 1.390(2)   | C7A                | C8A  | 1.503(2) |
| C11                | C12 | 1.393(3)   | C8A                | C9A  | 1.523(2) |
| C12                | C13 | 1.388(3)   | C9A                | C10A | 1.393(2) |
| C13                | C14 | 1.396(2)   | C9A                | C14A | 1.389(3) |
| C11A               | C1A | 1.762(3)   | C10A               | C11A | 1.390(3) |
| C12A               | C1A | 1.776(3)   | C11A               | C12A | 1.392(3) |
| C13A               | C1A | 1.7686(18) | C12A               | C13A | 1.387(3) |
| C13A               | C1B | 1.781(11)  | C13A               | C14A | 1.395(3) |
| S1A                | O1A | 1.5854(13) |                    |      |          |

**Table S5.** Bond Angles for **2a**.

| Atom Atom Atom Angle/° |    |    |            | Atom Atom Atom Angle/° |     |      |            |
|------------------------|----|----|------------|------------------------|-----|------|------------|
| O1                     | S1 | N1 | 99.01(7)   | C3A                    | N1A | S1B  | 114.3(2)   |
| O2                     | S1 | O1 | 103.86(7)  | C11A                   | C1A | C12A | 109.91(11) |
| O2                     | S1 | O3 | 118.22(7)  | C11A                   | C1A | C13A | 109.36(13) |
| O2                     | S1 | N1 | 111.71(7)  | C13A                   | C1A | C12A | 108.43(15) |
| O3                     | S1 | O1 | 108.32(7)  | C2A                    | C1A | C11A | 106.71(18) |
| O3                     | S1 | N1 | 113.35(7)  | C2A                    | C1A | C12A | 111.23(16) |
| C2                     | O1 | S1 | 115.98(9)  | C2A                    | C1A | C13A | 111.18(13) |
| C3                     | O4 | C4 | 117.84(12) | O1A                    | C2A | C1A  | 107.93(15) |
| C3                     | N1 | S1 | 120.47(11) | O1B                    | S1B | N1A  | 101.5(6)   |
| C3                     | N2 | C6 | 117.70(12) | O2B                    | S1B | N1A  | 96.1(8)    |

**Atom Atom Atom Angle/°**

|     |     |     |            |
|-----|-----|-----|------------|
| C3  | N2  | C7  | 120.29(12) |
| C6  | N2  | C7  | 60.21(10)  |
| Cl2 | C1  | Cl1 | 108.82(9)  |
| Cl2 | C1  | Cl3 | 109.04(9)  |
| Cl3 | C1  | Cl1 | 109.60(8)  |
| C2  | C1  | Cl1 | 106.96(10) |
| C2  | C1  | Cl2 | 111.04(11) |
| C2  | C1  | Cl3 | 111.32(11) |
| O1  | C2  | C1  | 107.37(12) |
| O4  | C3  | N2  | 119.15(13) |
| N1  | C3  | O4  | 122.06(13) |
| N1  | C3  | N2  | 118.66(13) |
| O4  | C4  | C5  | 109.57(12) |
| C6  | C5  | C4  | 105.96(14) |
| N2  | C6  | C5  | 113.60(13) |
| N2  | C6  | C7  | 60.25(9)   |
| C7  | C6  | C5  | 124.47(14) |
| N2  | C7  | C8  | 120.67(12) |
| C6  | C7  | N2  | 59.53(10)  |
| C6  | C7  | C8  | 121.76(13) |
| C7  | C8  | C9  | 115.00(13) |
| C10 | C9  | C8  | 118.07(14) |
| C14 | C9  | C8  | 123.17(13) |
| C14 | C9  | C10 | 118.76(14) |
| C11 | C10 | C9  | 120.96(15) |

**Atom Atom Atom Angle/°**

|      |     |      |            |
|------|-----|------|------------|
| O2B  | S1B | O1B  | 106.8(10)  |
| O3B  | S1B | N1A  | 120.2(10)  |
| O3B  | S1B | O1B  | 108.4(12)  |
| O3B  | S1B | O2B  | 121.5(12)  |
| C2B  | O1B | S1B  | 121.0(11)  |
| Cl3A | C1B | Cl2B | 116.9(8)   |
| Cl1B | C1B | Cl3A | 106.6(7)   |
| Cl1B | C1B | Cl2B | 109.6(7)   |
| C2B  | C1B | Cl3A | 109.9(9)   |
| C2B  | C1B | Cl1B | 107.3(10)  |
| C2B  | C1B | Cl2B | 106.1(9)   |
| O1B  | C2B | C1B  | 110.4(11)  |
| C3A  | O4A | C4A  | 117.40(12) |
| C3A  | N2A | C6A  | 116.93(13) |
| C3A  | N2A | C7A  | 121.61(13) |
| C6A  | N2A | C7A  | 60.25(11)  |
| N1A  | C3A | O4A  | 121.83(13) |
| N1A  | C3A | N2A  | 119.42(14) |
| O4A  | C3A | N2A  | 118.55(13) |
| O4A  | C4A | C5A  | 109.01(13) |
| C6A  | C5A | C4A  | 105.17(14) |
| N2A  | C6A | C5A  | 112.97(13) |
| N2A  | C6A | C7A  | 60.02(11)  |
| C7A  | C6A | C5A  | 126.00(15) |
| N2A  | C7A | C6A  | 59.74(10)  |



**Atom Atom Atom Angle/°**

C10 C11 C12 119.79(15)  
 C13 C12 C11 119.74(15)  
 C12 C13 C14 120.58(16)  
 C9 C14 C13 120.17(15)  
 O1A S1A N1A 98.64(7)  
 O2A S1A O1A 103.78(8)  
 O2A S1A O3A 119.31(9)  
 O2A S1A N1A 111.97(8)  
 O3A S1A O1A 108.52(9)  
 O3A S1A N1A 112.09(8)  
 C2A O1A S1A 115.84(11)  
 C3A N1A S1A 120.53(11)

**Atom Atom Atom Angle/°**

N2A C7A C8A 121.19(13)  
 C6A C7A C8A 124.47(15)  
 C7A C8A C9A 114.09(15)  
 C10A C9A C8A 118.40(16)  
 C14A C9A C8A 122.80(15)  
 C14A C9A C10A 118.80(16)  
 C11A C10A C9A 120.99(18)  
 C10A C11A C12A 119.91(18)  
 C13A C12A C11A 119.44(17)  
 C12A C13A C14A 120.40(18)  
 C9A C14A C13A 120.45(17)

**Table S6.** Torsion Angles for **2a**.**A B C D Angle/°**

C11 C1 C2 O1 178.54(10)  
 C12 C1 C2 O1 -62.87(14)  
 C13 C1 C2 O1 58.83(14)  
 S1 O1 C2 C1 -156.37(10)  
 S1 N1 C3 O4 3.7(2)  
 S1 N1 C3 N2 179.47(11)  
 O1 S1 N1 C3 166.90(12)  
 O2 S1 O1 C2 174.43(11)  
 O2 S1 N1 C3 -84.18(13)  
 O3 S1 O1 C2 47.95(12)

**A B C D Angle/°**

S1A N1A C3A N2A 175.60(12)  
 O1A S1A N1A C3A 172.69(13)  
 O2A S1A O1A C2A 173.75(12)  
 O2A S1A N1A C3A -78.58(15)  
 O3A S1A O1A C2A 45.90(14)  
 O3A S1A N1A C3A 58.59(16)  
 N1A S1A O1A C2A -70.98(13)  
 N1A S1B O1B C2B 41.8(16)  
 C11B C1B C2B O1B 63.4(15)  
 C12B C1B C2B O1B -179.4(12)

| <b>A</b> | <b>B</b> | <b>C</b> | <b>D</b> | <b>Angle/°</b> | <b>A</b> | <b>B</b> | <b>C</b> | <b>D</b> | <b>Angle/°</b> |
|----------|----------|----------|----------|----------------|----------|----------|----------|----------|----------------|
| O3       | S1       | N1       | C3       | 52.38(14)      | S1B      | N1A      | C3A      | O4A      | 18.7(4)        |
| O4       | C4       | C5       | C6       | -61.85(16)     | S1B      | N1A      | C3A      | N2A      | -166.5(3)      |
| N1       | S1       | O1       | C2       | -70.42(12)     | S1B      | O1B      | C2B      | C1B      | 162.4(12)      |
| N2       | C6       | C7       | C8       | 109.38(15)     | O2B      | S1B      | O1B      | C2B      | -58.3(18)      |
| N2       | C7       | C8       | C9       | -97.86(17)     | O3B      | S1B      | O1B      | C2B      | 169.2(17)      |
| C3       | O4       | C4       | C5       | 35.22(19)      | O4A      | C4A      | C5A      | C6A      | -64.57(17)     |
| C3       | N2       | C6       | C5       | 6.65(19)       | N2A      | C6A      | C7A      | C8A      | 109.07(17)     |
| C3       | N2       | C6       | C7       | -110.84(14)    | N2A      | C7A      | C8A      | C9A      | -91.06(18)     |
| C3       | N2       | C7       | C6       | 106.61(15)     | C3A      | N1A      | S1B      | O1B      | 145.7(6)       |
| C3       | N2       | C7       | C8       | -4.6(2)        | C3A      | N1A      | S1B      | O2B      | -105.7(9)      |
| C4       | O4       | C3       | N1       | -167.55(14)    | C3A      | N1A      | S1B      | O3B      | 26.4(13)       |
| C4       | O4       | C3       | N2       | 16.7(2)        | C3A      | O4A      | C4A      | C5A      | 35.7(2)        |
| C4       | C5       | C6       | N2       | 41.26(17)      | C3A      | N2A      | C6A      | C5A      | 6.8(2)         |
| C4       | C5       | C6       | C7       | 110.35(16)     | C3A      | N2A      | C6A      | C7A      | -112.75(15)    |
| C5       | C6       | C7       | N2       | -99.62(16)     | C3A      | N2A      | C7A      | C6A      | 105.12(16)     |
| C5       | C6       | C7       | C8       | 9.8(2)         | C3A      | N2A      | C7A      | C8A      | -9.3(2)        |
| C6       | N2       | C3       | O4       | -39.34(19)     | C4A      | O4A      | C3A      | N1A      | -166.51(15)    |
| C6       | N2       | C3       | N1       | 144.73(14)     | C4A      | O4A      | C3A      | N2A      | 18.7(2)        |
| C6       | N2       | C7       | C8       | -111.17(16)    | C4A      | C5A      | C6A      | N2A      | 43.22(18)      |
| C6       | C7       | C8       | C9       | -168.82(13)    | C4A      | C5A      | C6A      | C7A      | 111.94(17)     |
| C7       | N2       | C3       | O4       | -109.27(16)    | C5A      | C6A      | C7A      | N2A      | -97.91(17)     |
| C7       | N2       | C3       | N1       | 74.80(18)      | C5A      | C6A      | C7A      | C8A      | 11.2(3)        |
| C7       | N2       | C6       | C5       | 117.50(15)     | C6A      | N2A      | C3A      | N1A      | 143.36(15)     |
| C7       | C8       | C9       | C10      | -165.03(14)    | C6A      | N2A      | C3A      | O4A      | -41.7(2)       |
| C7       | C8       | C9       | C14      | 15.8(2)        | C6A      | N2A      | C7A      | C8A      | -114.37(18)    |

|          |          |          |          |                |          |          |          |          |                |
|----------|----------|----------|----------|----------------|----------|----------|----------|----------|----------------|
| <b>A</b> | <b>B</b> | <b>C</b> | <b>D</b> | <b>Angle/°</b> | <b>A</b> | <b>B</b> | <b>C</b> | <b>D</b> | <b>Angle/°</b> |
| C8       | C9       | C10      | C11      | -179.27(15)    | C6A      | C7A      | C8A      | C9A      | -163.65(14)    |
| C8       | C9       | C14      | C13      | 179.70(14)     | C7A      | N2A      | C3A      | N1A      | 73.3(2)        |
| C9       | C10      | C11      | C12      | -0.1(2)        | C7A      | N2A      | C3A      | O4A      | -111.75(17)    |
| C10      | C9       | C14      | C13      | 0.6(2)         | C7A      | N2A      | C6A      | C5A      | 119.51(16)     |
| C10      | C11      | C12      | C13      | -0.1(3)        | C7A      | C8A      | C9A      | C10A     | -163.84(15)    |
| C11      | C12      | C13      | C14      | 0.6(3)         | C7A      | C8A      | C9A      | C14A     | 16.7(2)        |
| C12      | C13      | C14      | C9       | -0.8(2)        | C8A      | C9A      | C10A     | C11A     | -178.70(16)    |
| C14      | C9       | C10      | C11      | -0.1(2)        | C8A      | C9A      | C14A     | C13A     | 179.73(15)     |
| C11A     | C1A      | C2A      | O1A      | 172.03(13)     | C9A      | C10A     | C11A     | C12A     | -1.2(3)        |
| C12A     | C1A      | C2A      | O1A      | -68.10(16)     | C10A     | C9A      | C14A     | C13A     | 0.2(3)         |
| C13A     | C1A      | C2A      | O1A      | 52.8(2)        | C10A     | C11A     | C12A     | C13A     | 0.5(3)         |
| C13A     | C1B      | C2B      | O1B      | -52.1(16)      | C11A     | C12A     | C13A     | C14A     | 0.6(3)         |
| S1A      | O1A      | C2A      | C1A      | -165.37(14)    | C12A     | C13A     | C14A     | C9A      | -0.9(3)        |
| S1A      | N1A      | C3A      | O4A      | 0.8(2)         | C14A     | C9A      | C10A     | C11A     | 0.8(3)         |

**Table S7.** Hydrogen Atom Coordinates ( $\text{\AA}\times 104$ ) and Isotropic Displacement Parameters ( $\text{\AA}^2\times 103$ ) for **2a**.

| <b>Atom</b> | <b>x</b> | <b>y</b> | <b>z</b> | <b>U(eq)</b> |
|-------------|----------|----------|----------|--------------|
| H2A         | 7957.44  | 5061.21  | 5474.06  | 17           |
| H2B         | 7891.68  | 3806.75  | 4766.36  | 17           |
| H4A         | 12889.76 | 5654.3   | 3824.48  | 21           |
| H4B         | 12548.87 | 4141.4   | 3519.36  | 21           |
| H5A         | 12222.09 | 3651.12  | 5095.66  | 22           |
| H5B         | 13502.93 | 4115.19  | 5057.14  | 22           |
| H6          | 13205.55 | 6164.85  | 5753.92  | 18           |
| H7          | 11762.05 | 6342.39  | 6706.67  | 16           |

| <b>Atom</b> | <b><i>x</i></b> | <b><i>y</i></b> | <b><i>z</i></b> | <b>U(eq)</b> |
|-------------|-----------------|-----------------|-----------------|--------------|
| H8A         | 11343.29        | 3867.45         | 6733.86         | 17           |
| H8B         | 10628.77        | 4084.45         | 5741.59         | 17           |
| H10         | 9567.03         | 2899.58         | 7171.55         | 19           |
| H11         | 7961.46         | 3295.81         | 7905.63         | 23           |
| H12         | 7271.92         | 5498.55         | 8003.92         | 23           |
| H13         | 8202.26         | 7287.95         | 7374.52         | 23           |
| H14         | 9797.85         | 6894.14         | 6618.76         | 19           |
| H2AA        | 4542.45         | 4885.91         | -66.59          | 18           |
| H2AB        | 4985.71         | 3846.14         | 745.87          | 18           |
| H2BA        | 5127.68         | 6514.64         | 817.92          | 20           |
| H2BB        | 4609.11         | 5663.93         | -72.75          | 20           |
| H4AA        | -288.05         | 5238.44         | 1661.91         | 22           |
| H4AB        | 179.14          | 3824.49         | 2084.58         | 22           |
| H5AA        | 519.63          | 3138.16         | 532.12          | 23           |
| H5AB        | -795.05         | 3414.65         | 589.46          | 23           |
| H6A         | -758.5          | 5419.42         | -231.18         | 22           |
| H7A         | 542.42          | 5705.38         | -1284.99        | 21           |
| H8AA        | 1252.65         | 3370.3          | -1335.66        | 21           |
| H8AB        | 1969.7          | 3652.95         | -351.91         | 21           |
| H10A        | 3085.69         | 2763.82         | -1864.72        | 26           |
| H11A        | 4609.74         | 3483.71         | -2606.98        | 31           |
| H12A        | 5033.31         | 5788.73         | -2667.42        | 31           |
| H13A        | 3936.08         | 7347.6          | -1962.16        | 28           |
| H14A        | 2443.65         | 6614.57         | -1179.17        | 24           |

**Table S8.** Atomic Occupancy for **2a**.

| <i>Atom Occupancy</i> | <i>Atom Occupancy</i> | <i>Atom Occupancy</i> |
|-----------------------|-----------------------|-----------------------|
| Cl1A 0.921(2)         | Cl2A 0.921(2)         | S1A 0.921(2)          |
| O1A 0.921(2)          | O2A 0.921(2)          | O3A 0.921(2)          |
| C1A 0.921(2)          | C2A 0.921(2)          | H2AA 0.921(2)         |
| H2AB 0.921(2)         | Cl1B 0.079(2)         | Cl2B 0.079(2)         |
| S1B 0.079(2)          | O1B 0.079(2)          | O2B 0.079(2)          |
| O3B 0.079(2)          | C1B 0.079(2)          | C2B 0.079(2)          |
| H2BA 0.079(2)         | H2BB 0.079(2)         |                       |

## VI. Computational Studies.

Density functional theory (DFT) calculations, including geometry optimization, vibrational frequency calculations, and single-point energy calculations, were performed with the Gaussian 16 software package.<sup>18</sup> Geometries were optimized in the gas phase using the  $\omega$ B97X-D<sup>19</sup> functional and a mixed basis set of def2-TZVPP for Ag and def2-SVP for other atoms. Single-point energies were calculated using  $\omega$ B97X-D and the def2-TZVPP basis set for all atoms in dichloromethane (DCM) using the SMD solvation model.<sup>20</sup> Gibbs free energies were calculated at the standard conditions (298 K, 1 M solution). Quasiharmonic approximation from Grimme<sup>21</sup> was applied for vibrational entropy calculations using 100  $\text{cm}^{-1}$  as the frequency cut-off. Quasiharmonic approximations were computed using GoodVibes.<sup>22</sup> The 3D images of optimized structures were prepared using CYLView.<sup>23</sup>

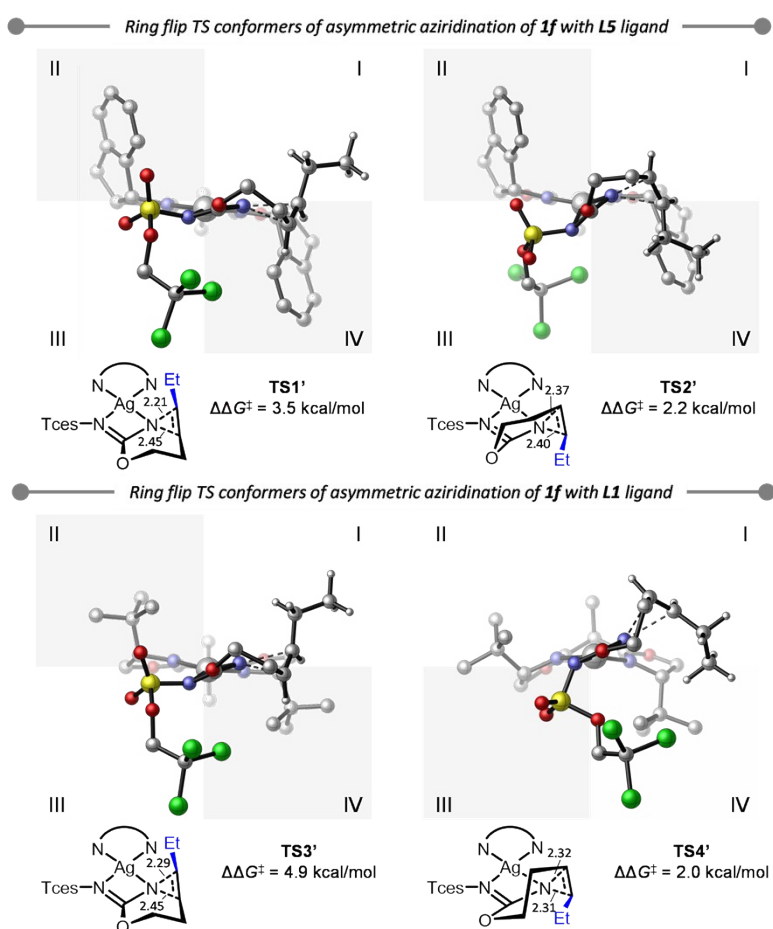

**Figure S4.** Alternative ring-flipped TS isomers. The relative Gibbs free energies ( $\Delta\Delta G^\ddagger$ ) of TS1' and TS2' are with respect to the TS1. The relative Gibbs free energies ( $\Delta\Delta G^\ddagger$ ) of TS3'-TS4' are with respect to TS3.

### Cartesian Coordinates (Å) and Energies of Optimized Structures

#### 3a (planar conformer)

|                                          |                     |
|------------------------------------------|---------------------|
| $\omega$ B97X-D SCF energy:              | -3832.58809321 a.u. |
| $\omega$ B97X-D enthalpy:                | -3831.918974 a.u.   |
| $\omega$ B97X-D free energy:             | -3832.042142 a.u.   |
| $\omega$ B97X-D SCF energy in solution:  | -3835.43139061 a.u. |
| $\omega$ B97X-D enthalpy in solution:    | -3834.762271 a.u.   |
| $\omega$ B97X-D free energy in solution: | -3834.885439 a.u.   |

#### Cartesian coordinates

| ATOM | X         | Y         | Z         |
|------|-----------|-----------|-----------|
| Ag   | -0.395842 | -0.466908 | 0.654991  |
| N    | -1.094786 | 1.340282  | 1.097784  |
| C    | -0.887778 | 1.828672  | -0.078780 |
| O    | -1.114353 | 3.023936  | -0.517113 |
| C    | -0.707132 | 4.312662  | 1.555127  |
| C    | 0.723031  | 4.535945  | 1.152485  |
| H    | -1.103021 | 5.220134  | 2.041965  |
| H    | -0.796605 | 3.501622  | 2.290321  |
| H    | 0.895665  | 5.387519  | 0.484319  |
| C    | -1.628240 | 4.035181  | 0.370655  |
| H    | -2.630600 | 3.728646  | 0.706071  |
| H    | -1.726249 | 4.912602  | -0.279334 |
| C    | 1.784582  | 3.805901  | 1.513448  |
| H    | 2.760664  | 4.120508  | 1.123260  |
| C    | 1.819312  | 2.584692  | 2.388574  |
| H    | 2.407259  | 2.812920  | 3.294195  |
| H    | 0.808282  | 2.318253  | 2.729194  |
| C    | 2.448416  | 1.388011  | 1.673179  |
| H    | 2.421064  | 0.481957  | 2.299241  |
| H    | 1.923673  | 1.174997  | 0.729393  |
| H    | 3.500664  | 1.575935  | 1.410603  |
| O    | -0.525241 | -2.530836 | 4.335172  |
| N    | -0.691661 | -1.229476 | 2.559847  |
| C    | -1.201517 | -1.354389 | 4.860363  |
| H    | -0.493578 | -0.874217 | 5.548220  |
| C    | -2.532214 | -1.737870 | 5.504198  |
| H    | -2.716645 | -1.107464 | 6.388265  |
| H    | -2.514154 | -2.780878 | 5.852265  |
| C    | -3.551357 | -1.470787 | 4.423614  |
| C    | -4.903135 | -1.806992 | 4.411371  |
| H    | -5.347698 | -2.361281 | 5.240826  |

|   |           |           |           |
|---|-----------|-----------|-----------|
| C | -5.683693 | -1.422266 | 3.321655  |
| H | -6.743795 | -1.682317 | 3.298056  |
| C | -5.124919 | -0.701405 | 2.262358  |
| H | -5.751255 | -0.400871 | 1.420389  |
| C | -3.773647 | -0.358935 | 2.274578  |
| H | -3.339100 | 0.219037  | 1.456679  |
| C | -2.994745 | -0.758457 | 3.359124  |
| C | -1.511720 | -0.546467 | 3.575115  |
| H | -1.227325 | 0.513649  | 3.619407  |
| C | -0.255013 | -2.331474 | 3.060937  |
| C | 0.497935  | -3.403392 | 2.386006  |
| C | 0.261194  | -4.829047 | 2.916725  |
| H | -0.500941 | -4.917778 | 3.692106  |
| H | 0.264470  | -5.610913 | 2.156149  |
| O | 1.446096  | -4.313494 | 0.428014  |
| N | 0.563569  | -2.299692 | 0.147997  |
| C | 1.609991  | -4.092925 | -0.997964 |
| H | 0.945771  | -4.809091 | -1.498703 |
| C | 3.076639  | -4.218384 | -1.409385 |
| H | 3.150989  | -4.711296 | -2.391259 |
| H | 3.633697  | -4.842224 | -0.695017 |
| C | 3.561844  | -2.791034 | -1.479565 |
| C | 4.860764  | -2.329273 | -1.683671 |
| H | 5.692657  | -3.030683 | -1.778698 |
| C | 5.084537  | -0.955462 | -1.774455 |
| H | 6.097689  | -0.582923 | -1.938092 |
| C | 4.023880  | -0.052009 | -1.664246 |
| H | 4.204623  | 1.021352  | -1.748659 |
| C | 2.724993  | -0.513389 | -1.456944 |
| H | 1.899596  | 0.193456  | -1.361885 |
| C | 2.505533  | -1.885658 | -1.363461 |
| C | 1.194728  | -2.610695 | -1.151808 |
| H | 0.475232  | -2.419341 | -1.956985 |
| C | 0.812216  | -3.278412 | 0.946307  |
| C | 1.529420  | -4.159816 | 3.244635  |
| H | 2.435682  | -4.465677 | 2.719846  |
| H | 1.669729  | -3.769176 | 4.253803  |
| N | -0.321920 | 0.874012  | -0.911524 |
| S | -1.136972 | 0.524208  | -2.331150 |
| O | -2.543862 | 0.784834  | -2.200097 |
| O | -0.635518 | -0.756859 | -2.778811 |
| O | -0.567887 | 1.672258  | -3.292837 |
| C | 0.701461  | 1.514810  | -3.908183 |
| H | 1.248868  | 0.655643  | -3.495492 |
| H | 0.546729  | 1.354839  | -4.984441 |
| C | 1.546279  | 2.778027  | -3.731914 |



|    |          |          |           |
|----|----------|----------|-----------|
| Cl | 0.717657 | 4.181358 | -4.430947 |
| Cl | 1.884883 | 3.093594 | -2.007113 |
| Cl | 3.080202 | 2.475156 | -4.591491 |

**3b** (*boat conformer*)

|                                          |                     |
|------------------------------------------|---------------------|
| $\omega$ B97X-D SCF energy:              | -3832.56988802 a.u. |
| $\omega$ B97X-D enthalpy:                | -3831.901614 a.u.   |
| $\omega$ B97X-D free energy:             | -3832.031441 a.u.   |
| $\omega$ B97X-D SCF energy in solution:  | -3835.41240807 a.u. |
| $\omega$ B97X-D enthalpy in solution:    | -3834.744134 a.u.   |
| $\omega$ B97X-D free energy in solution: | -3834.873961 a.u.   |

Cartesian coordinates

| ATOM | X         | Y         | Z         |
|------|-----------|-----------|-----------|
| Ag   | 0.503729  | -0.439535 | -0.238834 |
| N    | -1.367941 | -0.369255 | -0.909351 |
| C    | -1.789891 | -1.280276 | -0.101176 |
| O    | -3.001124 | -1.700894 | 0.083102  |
| C    | -5.385170 | -1.590274 | -0.119158 |
| C    | -6.548121 | -0.822535 | -0.690897 |
| H    | -5.411946 | -2.649500 | -0.413648 |
| H    | -5.417974 | -1.563978 | 0.980965  |
| H    | -6.833730 | 0.085426  | -0.148256 |
| C    | -4.070671 | -0.986171 | -0.572813 |
| H    | -3.939756 | -1.073435 | -1.662448 |
| H    | -3.990910 | 0.077553  | -0.298692 |
| C    | -7.232825 | -1.133577 | -1.796796 |
| H    | -8.059414 | -0.470119 | -2.078920 |
| C    | -7.033094 | -2.319799 | -2.695463 |
| H    | -6.874885 | -1.952793 | -3.724179 |
| H    | -6.119370 | -2.871683 | -2.424936 |
| C    | -8.234084 | -3.268689 | -2.683150 |
| H    | -9.157377 | -2.744926 | -2.974672 |
| H    | -8.086217 | -4.102840 | -3.384224 |
| H    | -8.392847 | -3.689587 | -1.679026 |
| O    | 2.939291  | 2.269260  | -2.339089 |
| N    | 1.369336  | 1.000266  | -1.454566 |
| C    | 1.921435  | 2.242774  | -3.378241 |
| H    | 2.327163  | 1.633273  | -4.196944 |
| C    | 1.538017  | 3.661872  | -3.778151 |
| H    | 1.225337  | 3.679721  | -4.834394 |
| H    | 2.393661  | 4.345703  | -3.682747 |
| C    | 0.385281  | 3.984334  | -2.860600 |
| C    | -0.205481 | 5.221844  | -2.618409 |
| H    | 0.172631  | 6.124768  | -3.102794 |
| C    | -1.289138 | 5.290323  | -1.743318 |
| H    | -1.759310 | 6.254548  | -1.539929 |

|    |           |           |           |
|----|-----------|-----------|-----------|
| C  | -1.780202 | 4.136795  | -1.126176 |
| H  | -2.627991 | 4.209090  | -0.442601 |
| C  | -1.196087 | 2.895093  | -1.371807 |
| H  | -1.580093 | 1.989274  | -0.900552 |
| C  | -0.107138 | 2.833691  | -2.238350 |
| C  | 0.722397  | 1.623221  | -2.624370 |
| H  | 0.160692  | 0.868225  | -3.191030 |
| C  | 2.552842  | 1.495849  | -1.344432 |
| C  | 3.507675  | 1.419225  | -0.189548 |
| C  | 3.642045  | 2.580902  | 0.782265  |
| H  | 3.021735  | 3.455556  | 0.572037  |
| H  | 3.730978  | 2.316867  | 1.838378  |
| O  | 4.652811  | -0.490339 | 0.653444  |
| N  | 2.481067  | -0.795463 | 0.387422  |
| C  | 4.467533  | -1.847979 | 1.128994  |
| H  | 4.733853  | -1.842470 | 2.193100  |
| C  | 5.285717  | -2.839368 | 0.295031  |
| H  | 5.775724  | -3.576686 | 0.949376  |
| H  | 6.083646  | -2.317977 | -0.253995 |
| C  | 4.269611  | -3.503229 | -0.602608 |
| C  | 4.493801  | -4.416982 | -1.630359 |
| H  | 5.509600  | -4.711020 | -1.903514 |
| C  | 3.398804  | -4.959470 | -2.302667 |
| H  | 3.562114  | -5.676984 | -3.109253 |
| C  | 2.094202  | -4.607565 | -1.944426 |
| H  | 1.248370  | -5.057703 | -2.467501 |
| C  | 1.866306  | -3.696849 | -0.913376 |
| H  | 0.847222  | -3.439981 | -0.612354 |
| C  | 2.965496  | -3.141773 | -0.260322 |
| C  | 2.964836  | -2.111746 | 0.844336  |
| H  | 2.379723  | -2.408206 | 1.725143  |
| C  | 3.485322  | -0.007221 | 0.270308  |
| C  | 4.758698  | 2.247057  | -0.146626 |
| H  | 5.642085  | 1.754449  | 0.261539  |
| H  | 4.930747  | 2.898600  | -1.004301 |
| N  | -0.735675 | -1.818005 | 0.629018  |
| S  | -0.840867 | -1.879879 | 2.284184  |
| O  | 0.493932  | -1.723308 | 2.824876  |
| O  | -1.682534 | -2.972821 | 2.666255  |
| O  | -1.661073 | -0.493986 | 2.564730  |
| C  | -1.295107 | 0.386775  | 3.600413  |
| H  | -2.107669 | 0.423392  | 4.340516  |
| H  | -0.360570 | 0.070814  | 4.087590  |
| C  | -1.105445 | 1.798560  | 3.038956  |
| Cl | -0.819118 | 2.889702  | 4.405096  |
| Cl | 0.325367  | 1.851909  | 1.945892  |

Cl -2.546835 2.303321 2.131595

**4a** (*planar conformer*)

$\omega$ B97X-D SCF energy: -3610.24647141 a.u.  
 $\omega$ B97X-D enthalpy: -3609.504267 a.u.  
 $\omega$ B97X-D free energy: -3609.633155 a.u.  
 $\omega$ B97X-D SCF energy in solution: -3612.85876684 a.u.  
 $\omega$ B97X-D enthalpy in solution: -3612.116562 a.u.  
 $\omega$ B97X-D free energy in solution: -3612.245450 a.u.

Cartesian coordinates

| ATOM | X         | Y         | Z         |
|------|-----------|-----------|-----------|
| C    | 4.370339  | -0.786134 | 1.081416  |
| C    | 3.461099  | -1.099519 | -0.111014 |
| N    | 2.588352  | 0.100046  | -0.119633 |
| C    | 3.185724  | 1.018048  | 0.553071  |
| O    | 4.271602  | 0.648349  | 1.203100  |
| C    | 2.870838  | 2.486992  | 0.691425  |
| C    | 1.622410  | 2.913592  | -0.039067 |
| N    | 0.585002  | 2.216319  | -0.351046 |
| C    | -0.494884 | 3.153907  | -0.735584 |
| C    | 0.328830  | 4.402401  | -1.061948 |
| O    | 1.539387  | 4.201709  | -0.296683 |
| C    | 4.085909  | 3.279485  | 0.162334  |
| C    | 2.635818  | 2.799191  | 2.191126  |
| H    | 5.425461  | -1.042315 | 0.940374  |
| H    | 4.008828  | -1.223276 | 2.023524  |
| H    | 0.618610  | 4.468836  | -2.120797 |
| H    | -0.120122 | 5.349210  | -0.745817 |
| H    | 3.919018  | 4.353061  | 0.309835  |
| H    | 4.246169  | 3.095846  | -0.909522 |
| H    | 4.988084  | 2.980388  | 0.708858  |
| H    | 2.397694  | 3.863511  | 2.318082  |
| H    | 1.809026  | 2.197432  | 2.595297  |
| H    | 3.548611  | 2.571894  | 2.756200  |
| Ag   | 0.568743  | 0.174723  | -0.826897 |
| N    | -1.202418 | 0.215563  | -1.729821 |
| C    | -1.221811 | -1.043726 | -2.018695 |
| O    | -2.162179 | -1.727645 | -2.589042 |
| C    | -4.247090 | -1.259321 | -1.412982 |
| C    | -5.685976 | -0.856894 | -1.603256 |
| H    | -4.189688 | -2.306550 | -1.079042 |
| H    | -3.755322 | -0.650496 | -0.638673 |
| H    | -6.356728 | -1.638464 | -1.975460 |
| C    | -3.473804 | -1.138098 | -2.718838 |

|   |           |           |           |
|---|-----------|-----------|-----------|
| H | -3.949234 | -1.709928 | -3.524168 |
| H | -3.376881 | -0.090259 | -3.040282 |
| C | -1.544204 | 3.353072  | 0.397612  |
| C | -2.699166 | 4.170208  | -0.198094 |
| H | -3.461146 | 4.364271  | 0.570652  |
| H | -2.369215 | 5.149403  | -0.579145 |
| H | -3.185683 | 3.629049  | -1.023972 |
| C | -0.954414 | 4.090021  | 1.608236  |
| H | -0.118443 | 3.531669  | 2.054772  |
| H | -0.607393 | 5.106864  | 1.371536  |
| H | -1.723289 | 4.186712  | 2.388484  |
| C | -2.070901 | 1.995256  | 0.870843  |
| H | -2.435467 | 1.386791  | 0.032655  |
| H | -1.291986 | 1.420316  | 1.391954  |
| H | -2.898087 | 2.140558  | 1.580580  |
| C | 4.200781  | -1.297228 | -1.464701 |
| C | 3.182337  | -1.420948 | -2.604048 |
| H | 2.636747  | -0.479154 | -2.773900 |
| H | 3.698244  | -1.667456 | -3.543500 |
| H | 2.448188  | -2.212230 | -2.403436 |
| C | 4.984871  | -2.614328 | -1.365832 |
| H | 4.310395  | -3.460216 | -1.163029 |
| H | 5.504036  | -2.817312 | -2.313799 |
| H | 5.752185  | -2.590478 | -0.576770 |
| C | 5.153027  | -0.133364 | -1.768070 |
| H | 4.608832  | 0.820163  | -1.858014 |
| H | 5.938214  | -0.013091 | -1.006291 |
| H | 5.659177  | -0.304771 | -2.729285 |
| H | 2.842219  | -1.983659 | 0.077602  |
| H | -1.008973 | 2.754652  | -1.620307 |
| C | -6.193699 | 0.360593  | -1.387155 |
| H | -7.266423 | 0.501591  | -1.562859 |
| C | -5.454763 | 1.563767  | -0.873557 |
| H | -4.368349 | 1.434346  | -0.999259 |
| H | -5.732627 | 2.436944  | -1.487230 |
| C | -5.772845 | 1.857984  | 0.594199  |
| H | -6.855236 | 1.980545  | 0.749979  |
| H | -5.436372 | 1.033137  | 1.240955  |
| H | -5.280789 | 2.782282  | 0.930959  |
| N | -0.037041 | -1.641630 | -1.636468 |
| S | -0.080454 | -3.060836 | -0.793687 |
| O | 1.208604  | -3.255327 | -0.164708 |
| O | -0.673960 | -4.088165 | -1.596058 |
| O | -1.149575 | -2.655390 | 0.380195  |
| C | -0.972162 | -3.129534 | 1.695176  |
| H | -1.801139 | -3.804418 | 1.953574  |

|    |           |           |          |
|----|-----------|-----------|----------|
| H  | -0.014001 | -3.658360 | 1.805539 |
| C  | -0.992545 | -1.954265 | 2.674663 |
| Cl | -0.784986 | -2.602278 | 4.309092 |
| Cl | 0.377770  | -0.837356 | 2.307493 |
| Cl | -2.524046 | -1.067007 | 2.551477 |

**4b** (*boat conformer*)

|                                          |                     |
|------------------------------------------|---------------------|
| $\omega$ B97X-D SCF energy:              | -3610.24353500 a.u. |
| $\omega$ B97X-D enthalpy:                | -3609.501943 a.u.   |
| $\omega$ B97X-D free energy:             | -3609.629847 a.u.   |
| $\omega$ B97X-D SCF energy in solution:  | -3612.85647675 a.u. |
| $\omega$ B97X-D enthalpy in solution:    | -3612.114885 a.u.   |
| $\omega$ B97X-D free energy in solution: | -3612.242789 a.u.   |

Cartesian coordinates

| ATOM | X         | Y         | Z         |
|------|-----------|-----------|-----------|
| C    | 1.112449  | 4.176812  | 0.507945  |
| C    | 0.670375  | 2.794505  | 1.030734  |
| N    | 1.377605  | 1.907741  | 0.100122  |
| C    | 2.234539  | 2.587411  | -0.564677 |
| O    | 2.231710  | 3.885418  | -0.364910 |
| C    | 3.219768  | 2.007793  | -1.562879 |
| C    | 3.780236  | 0.723163  | -0.964817 |
| N    | 3.120986  | -0.261185 | -0.457377 |
| C    | 4.098868  | -1.172420 | 0.191028  |
| C    | 5.407445  | -0.699338 | -0.456392 |
| O    | 5.091052  | 0.619528  | -0.940288 |
| C    | 4.346751  | 3.010934  | -1.843272 |
| C    | 2.465466  | 1.682951  | -2.876251 |
| H    | 1.464233  | 4.871642  | 1.278894  |
| H    | 0.340358  | 4.662581  | -0.102986 |
| H    | 6.249531  | -0.617832 | 0.238258  |
| H    | 5.703303  | -1.305451 | -1.325383 |
| H    | 4.900243  | 3.268936  | -0.931468 |
| H    | 3.919630  | 3.930564  | -2.260934 |
| H    | 5.052124  | 2.587080  | -2.568021 |
| H    | 3.164193  | 1.248936  | -3.604367 |
| H    | 1.632333  | 0.979416  | -2.734166 |
| H    | 2.053770  | 2.609374  | -3.298956 |
| Ag   | 0.998121  | -0.110041 | -0.370739 |
| N    | 0.345511  | -1.911529 | -0.935998 |
| C    | -0.892766 | -1.571982 | -0.934421 |
| O    | -1.942850 | -2.260124 | -1.255135 |
| C    | -1.950471 | -4.620240 | -0.643417 |
| C    | -0.816527 | -4.614731 | 0.344123  |

|   |           |           |           |
|---|-----------|-----------|-----------|
| H | -2.919464 | -4.445060 | -0.153662 |
| H | -2.017410 | -5.611167 | -1.121755 |
| H | 0.118038  | -5.061644 | -0.014294 |
| C | -1.787440 | -3.603417 | -1.762800 |
| H | -0.810434 | -3.687355 | -2.261805 |
| H | -2.582012 | -3.704542 | -2.511884 |
| C | 3.834032  | -2.691064 | 0.106275  |
| C | 5.115500  | -3.403451 | 0.574284  |
| H | 4.935723  | -4.486071 | 0.640468  |
| H | 5.957068  | -3.260533 | -0.120828 |
| H | 5.428921  | -3.060020 | 1.573380  |
| C | 3.486024  | -3.119412 | -1.323200 |
| H | 4.276719  | -2.851711 | -2.041721 |
| H | 3.371901  | -4.212774 | -1.364684 |
| H | 2.539107  | -2.673777 | -1.656317 |
| C | 2.701215  | -3.067218 | 1.071803  |
| H | 1.741325  | -2.615558 | 0.792010  |
| H | 2.548906  | -4.157073 | 1.061753  |
| H | 2.948397  | -2.777300 | 2.105606  |
| C | 1.017751  | 2.466466  | 2.505331  |
| C | 0.647458  | 1.002965  | 2.791660  |
| H | 0.682051  | 0.802388  | 3.872468  |
| H | -0.366142 | 0.760277  | 2.438230  |
| H | 1.354385  | 0.300212  | 2.319516  |
| C | 0.169022  | 3.380835  | 3.398977  |
| H | -0.906275 | 3.219640  | 3.225053  |
| H | 0.372185  | 3.175966  | 4.460180  |
| H | 0.383507  | 4.446922  | 3.227106  |
| C | 2.510074  | 2.674593  | 2.788687  |
| H | 3.132715  | 2.037297  | 2.139758  |
| H | 2.825391  | 3.719923  | 2.649459  |
| H | 2.740318  | 2.403955  | 3.829666  |
| H | -0.409374 | 2.657402  | 0.884054  |
| H | 4.102044  | -0.900704 | 1.262518  |
| C | -0.829341 | -4.111551 | 1.582933  |
| H | 0.098693  | -4.194542 | 2.162421  |
| C | -1.948760 | -3.406895 | 2.291013  |
| H | -2.858049 | -3.381376 | 1.672749  |
| H | -2.205519 | -3.976763 | 3.200146  |
| C | -1.564139 | -1.980378 | 2.687692  |
| H | -2.362428 | -1.501749 | 3.272794  |
| H | -0.645552 | -1.969857 | 3.296419  |
| H | -1.393169 | -1.354178 | 1.799290  |
| N | -1.042664 | -0.252299 | -0.497339 |
| S | -1.670121 | 0.818977  | -1.632567 |
| O | -1.267459 | 0.428762  | -2.960372 |

|    |           |           |           |
|----|-----------|-----------|-----------|
| O  | -1.435862 | 2.164407  | -1.154987 |
| O  | -3.230611 | 0.474823  | -1.510240 |
| C  | -4.145911 | 1.291874  | -0.804907 |
| H  | -3.833539 | 2.345870  | -0.815949 |
| H  | -5.097818 | 1.181579  | -1.339703 |
| C  | -4.376746 | 0.854464  | 0.650487  |
| Cl | -4.622614 | -0.899739 | 0.743167  |
| Cl | -3.005044 | 1.322078  | 1.701308  |
| Cl | -5.832537 | 1.714860  | 1.206825  |

### TS1

|                                          |                            |
|------------------------------------------|----------------------------|
| $\omega$ B97X-D SCF energy:              | -3832.57394285 a.u.        |
| $\omega$ B97X-D enthalpy:                | -3831.907141 a.u.          |
| $\omega$ B97X-D free energy:             | -3832.032028 a.u.          |
| $\omega$ B97X-D SCF energy in solution:  | -3835.41051067 a.u.        |
| $\omega$ B97X-D enthalpy in solution:    | -3834.743709 a.u.          |
| $\omega$ B97X-D free energy in solution: | -3834.868596 a.u.          |
| Imaginary frequency:                     | -259.5311 cm <sup>-1</sup> |

### Cartesian coordinates

| ATOM | X         | Y         | Z        |
|------|-----------|-----------|----------|
| Ag   | -0.378619 | 0.005539  | 0.467136 |
| N    | 1.374574  | -0.688874 | 1.570887 |
| C    | 1.150836  | -1.952989 | 1.271147 |
| O    | 1.958727  | -2.974610 | 1.444482 |
| C    | 3.974782  | -2.157170 | 2.550779 |
| C    | 3.342149  | -0.831699 | 2.833813 |
| H    | 3.857024  | -2.847276 | 3.398757 |
| H    | 5.053816  | -2.029786 | 2.377901 |
| H    | 3.781389  | 0.049355  | 2.357238 |
| C    | 3.372072  | -2.792222 | 1.304309 |
| H    | 3.553139  | -2.185754 | 0.403756 |
| H    | 3.769316  | -3.800723 | 1.140436 |
| C    | 2.260668  | -0.645056 | 3.646697 |
| H    | 1.932674  | 0.387130  | 3.803719 |
| C    | 1.559136  | -1.674103 | 4.474969 |
| H    | 0.474541  | -1.504366 | 4.379771 |
| H    | 1.751339  | -2.686530 | 4.092757 |
| C    | 1.963591  | -1.577312 | 5.950599 |
| H    | 1.759619  | -0.576212 | 6.358848 |
| H    | 1.399470  | -2.306157 | 6.548585 |
| H    | 3.035645  | -1.784112 | 6.083800 |
| O    | -0.405512 | 4.327835  | 0.864871 |
| N    | -0.034424 | 2.141603  | 0.771338 |
| C    | 0.790462  | 4.177393  | 1.662225 |

|   |           |           |           |
|---|-----------|-----------|-----------|
| H | 0.508862  | 4.407585  | 2.698639  |
| C | 1.924186  | 5.050373  | 1.126208  |
| H | 2.517639  | 5.456155  | 1.960680  |
| H | 1.526786  | 5.910120  | 0.567419  |
| C | 2.744774  | 4.106705  | 0.282270  |
| C | 3.798213  | 4.414037  | -0.575972 |
| H | 4.112609  | 5.449555  | -0.723857 |
| C | 4.444175  | 3.377990  | -1.249339 |
| H | 5.266686  | 3.605509  | -1.930388 |
| C | 4.046892  | 2.051177  | -1.063076 |
| H | 4.553703  | 1.252953  | -1.607894 |
| C | 2.997369  | 1.740094  | -0.199611 |
| H | 2.680015  | 0.705876  | -0.053096 |
| C | 2.350291  | 2.779393  | 0.465525  |
| C | 1.167500  | 2.695743  | 1.407136  |
| H | 1.391592  | 2.126960  | 2.320343  |
| C | -0.804551 | 3.122477  | 0.469485  |
| C | -2.081091 | 3.109424  | -0.278073 |
| C | -2.323759 | 4.317212  | -1.199564 |
| H | -1.499539 | 5.028306  | -1.270945 |
| H | -2.843788 | 4.093036  | -2.131944 |
| O | -3.839140 | 1.952514  | -1.354847 |
| N | -2.253382 | 0.633664  | -0.527055 |
| C | -4.285896 | 0.635464  | -1.756038 |
| H | -4.223436 | 0.602856  | -2.851680 |
| C | -5.684926 | 0.339629  | -1.212318 |
| H | -6.270552 | -0.220120 | -1.958462 |
| H | -6.232171 | 1.271604  | -1.008189 |
| C | -5.433230 | -0.498985 | 0.017246  |
| C | -6.350413 | -0.919367 | 0.978211  |
| H | -7.398642 | -0.618016 | 0.918194  |
| C | -5.910925 | -1.737099 | 2.018810  |
| H | -6.619856 | -2.074060 | 2.777841  |
| C | -4.573741 | -2.137375 | 2.094438  |
| H | -4.248314 | -2.788201 | 2.908358  |
| C | -3.655126 | -1.719918 | 1.132483  |
| H | -2.613073 | -2.040773 | 1.185493  |
| C | -4.096894 | -0.893629 | 0.101610  |
| C | -3.284029 | -0.292358 | -1.023258 |
| H | -2.815720 | -1.057597 | -1.655808 |
| C | -2.684018 | 1.825639  | -0.708701 |
| C | -3.075644 | 4.230405  | 0.064737  |
| H | -4.128105 | 3.947342  | 0.026789  |
| H | -2.782778 | 4.879879  | 0.890400  |
| N | -0.049111 | -2.122743 | 0.691918  |
| S | -0.248952 | -3.236483 | -0.510947 |



|    |           |           |           |
|----|-----------|-----------|-----------|
| O  | -1.337994 | -2.784583 | -1.349416 |
| O  | -0.219660 | -4.565521 | 0.024448  |
| O  | 1.149695  | -3.021456 | -1.349563 |
| C  | 1.139477  | -2.824009 | -2.741620 |
| H  | 1.733986  | -3.619407 | -3.214071 |
| H  | 0.115867  | -2.838839 | -3.144381 |
| C  | 1.781768  | -1.480630 | -3.099406 |
| Cl | 1.876285  | -1.378535 | -4.865697 |
| Cl | 0.794133  | -0.119493 | -2.481874 |
| Cl | 3.422610  | -1.380048 | -2.399075 |

## TS2

|                                  |                            |
|----------------------------------|----------------------------|
| ωB97X-D SCF energy:              | -3832.56768594 a.u.        |
| ωB97X-D enthalpy:                | -3831.900924 a.u.          |
| ωB97X-D free energy:             | -3832.024739 a.u.          |
| ωB97X-D SCF energy in solution:  | -3835.40810113 a.u.        |
| ωB97X-D enthalpy in solution:    | -3834.741339 a.u.          |
| ωB97X-D free energy in solution: | -3834.865154 a.u.          |
| Imaginary frequency:             | -268.7030 cm <sup>-1</sup> |

## Cartesian coordinates

| ATOM | X         | Y         | Z         |
|------|-----------|-----------|-----------|
| Ag   | 0.361668  | -0.005262 | -0.588115 |
| N    | -1.373260 | -0.808597 | -1.795209 |
| C    | -0.935685 | -2.051325 | -1.741401 |
| O    | -1.400343 | -3.139189 | -2.293493 |
| C    | -2.616069 | -3.188042 | -3.030072 |
| C    | -2.681018 | -2.101733 | -4.093876 |
| C    | -2.637741 | -0.721111 | -3.499441 |
| H    | -3.452033 | -3.126642 | -2.319868 |
| H    | -2.623002 | -4.186131 | -3.482518 |
| H    | -1.848840 | -2.237154 | -4.798625 |
| H    | -3.609905 | -2.245848 | -4.670082 |
| H    | -1.920933 | -0.015631 | -3.922915 |
| C    | -3.601811 | -0.224652 | -2.657586 |
| H    | -3.456807 | 0.795346  | -2.285460 |
| C    | -4.841471 | -0.902912 | -2.190305 |
| H    | -5.669050 | -0.196728 | -2.377804 |
| H    | -5.057598 | -1.798793 | -2.789879 |
| C    | -4.832386 | -1.242757 | -0.693382 |
| H    | -5.773940 | -1.735187 | -0.414405 |
| H    | -3.998364 | -1.911919 | -0.434892 |
| H    | -4.730016 | -0.333200 | -0.086868 |
| O    | 0.268889  | 4.349530  | -0.841150 |
| N    | -0.016315 | 2.146917  | -0.812778 |

|   |           |           |           |
|---|-----------|-----------|-----------|
| C | -0.934453 | 4.176709  | -1.621692 |
| H | -0.678899 | 4.425845  | -2.660807 |
| C | -2.086466 | 5.004571  | -1.055170 |
| H | -2.738073 | 5.352674  | -1.872487 |
| H | -1.713114 | 5.900182  | -0.538043 |
| C | -2.809572 | 4.040500  | -0.146632 |
| C | -3.794969 | 4.314150  | 0.799135  |
| H | -4.146201 | 5.335939  | 0.958886  |
| C | -4.316274 | 3.263472  | 1.553981  |
| H | -5.080533 | 3.465724  | 2.307016  |
| C | -3.857683 | 1.956524  | 1.368354  |
| H | -4.253112 | 1.149524  | 1.988049  |
| C | -2.879546 | 1.677992  | 0.413922  |
| H | -2.511803 | 0.657883  | 0.276835  |
| C | -2.368185 | 2.729655  | -0.342437 |
| C | -1.258179 | 2.684629  | -1.371186 |
| H | -1.527197 | 2.127631  | -2.280677 |
| C | 0.724393  | 3.145347  | -0.496710 |
| C | 2.014471  | 3.153744  | 0.224250  |
| C | 2.244964  | 4.350473  | 1.161766  |
| H | 1.406364  | 5.040903  | 1.261500  |
| H | 2.788779  | 4.122037  | 2.079337  |
| O | 3.807927  | 2.020847  | 1.267952  |
| N | 2.259070  | 0.678745  | 0.402515  |
| C | 4.286305  | 0.706791  | 1.640841  |
| H | 4.204451  | 0.639612  | 2.733935  |
| C | 5.701879  | 0.469134  | 1.114432  |
| H | 6.280423  | -0.122251 | 1.841688  |
| H | 6.235913  | 1.420625  | 0.976169  |
| C | 5.491514  | -0.303116 | -0.165191 |
| C | 6.431508  | -0.635265 | -1.138586 |
| H | 7.468903  | -0.305417 | -1.047562 |
| C | 6.028571  | -1.400293 | -2.232676 |
| H | 6.755326  | -1.667763 | -3.002498 |
| C | 4.704947  | -1.834444 | -2.349178 |
| H | 4.407913  | -2.441942 | -3.206365 |
| C | 3.763688  | -1.505332 | -1.374917 |
| H | 2.732296  | -1.852284 | -1.458615 |
| C | 4.169004  | -0.732850 | -0.289058 |
| C | 3.325867  | -0.224952 | 0.860385  |
| H | 2.890681  | -1.041030 | 1.451667  |
| C | 2.654184  | 1.875959  | 0.619441  |
| C | 2.974667  | 4.303854  | -0.118088 |
| H | 4.034280  | 4.046059  | -0.105323 |
| H | 2.650807  | 4.960463  | -0.926517 |
| N | 0.203470  | -2.116146 | -1.020137 |

|    |           |           |           |
|----|-----------|-----------|-----------|
| S  | 0.433748  | -3.261799 | 0.125247  |
| O  | 1.580126  | -2.870653 | 0.916365  |
| O  | 0.325846  | -4.586723 | -0.416285 |
| O  | -0.913227 | -3.005345 | 1.040388  |
| C  | -0.824297 | -3.024668 | 2.443028  |
| H  | -1.422858 | -3.860134 | 2.835329  |
| H  | 0.218586  | -3.128165 | 2.778058  |
| C  | -1.387618 | -1.726041 | 3.025712  |
| Cl | -1.313209 | -1.846203 | 4.793222  |
| Cl | -0.417246 | -0.319878 | 2.485732  |
| Cl | -3.080165 | -1.507822 | 2.504237  |

### TS3

|                                  |                     |
|----------------------------------|---------------------|
| ωB97X-D SCF energy:              | -3610.23937452 a.u. |
| ωB97X-D enthalpy:                | -3609.499589 a.u.   |
| ωB97X-D free energy:             | -3609.628229 a.u.   |
| ωB97X-D SCF energy in solution:  | -3612.84701563 a.u. |
| ωB97X-D enthalpy in solution:    | -3612.107230 a.u.   |
| ωB97X-D free energy in solution: | -3612.235870 a.u.   |
| Imaginary frequency:             | -249.3186 cm-1      |

### Cartesian coordinates

| ATOM | X         | Y         | Z         |
|------|-----------|-----------|-----------|
| C    | -3.681579 | -2.433275 | -0.025594 |
| C    | -2.485236 | -2.089322 | 0.875796  |
| N    | -2.210404 | -0.693968 | 0.483167  |
| C    | -3.225977 | -0.259787 | -0.161192 |
| O    | -4.178772 | -1.144467 | -0.429769 |
| C    | -3.549778 | 1.135292  | -0.643776 |
| C    | -2.462604 | 2.156951  | -0.391849 |
| N    | -1.193247 | 1.994824  | -0.295617 |
| C    | -0.561602 | 3.325197  | -0.366964 |
| C    | -1.759026 | 4.243460  | -0.080090 |
| O    | -2.890874 | 3.412747  | -0.387150 |
| C    | -4.853982 | 1.572875  | 0.057600  |
| C    | -3.755660 | 1.087948  | -2.178262 |
| H    | -4.496198 | -2.972612 | 0.470483  |
| H    | -3.386972 | -2.978083 | -0.934349 |
| H    | -1.835651 | 4.534609  | 0.978051  |
| H    | -1.814058 | 5.141467  | -0.704880 |
| H    | -5.173568 | 2.550663  | -0.321485 |
| H    | -4.712457 | 1.650338  | 1.145210  |
| H    | -5.643144 | 0.837951  | -0.141106 |
| H    | -3.981613 | 2.093984  | -2.556382 |
| H    | -2.854798 | 0.711905  | -2.684595 |

|    |           |           |           |
|----|-----------|-----------|-----------|
| H  | -4.596747 | 0.424285  | -2.415484 |
| Ag | -0.195350 | 0.228887  | 0.545795  |
| N  | 1.703824  | 1.148961  | 1.003118  |
| C  | 2.295270  | -0.002061 | 1.254396  |
| O  | 3.579988  | -0.226553 | 1.397961  |
| C  | 4.707241  | 1.931989  | 1.462464  |
| C  | 3.412399  | 2.679124  | 1.539020  |
| H  | 5.118068  | 1.730967  | 2.462338  |
| H  | 5.453662  | 2.527627  | 0.916022  |
| H  | 3.170913  | 3.342615  | 0.703995  |
| C  | 4.526532  | 0.611604  | 0.726003  |
| H  | 4.183018  | 0.763804  | -0.309298 |
| H  | 5.455894  | 0.030336  | 0.715540  |
| C  | 0.140073  | 3.578820  | -1.731887 |
| C  | 0.874831  | 4.922986  | -1.633355 |
| H  | 1.400554  | 5.139813  | -2.574736 |
| H  | 0.192132  | 5.765453  | -1.442616 |
| H  | 1.625988  | 4.908658  | -0.827144 |
| C  | -0.870132 | 3.615853  | -2.886332 |
| H  | -1.408758 | 2.660995  | -2.976673 |
| H  | -1.610290 | 4.423605  | -2.783507 |
| H  | -0.343314 | 3.780081  | -3.837715 |
| C  | 1.159863  | 2.469122  | -2.008389 |
| H  | 1.869723  | 2.354543  | -1.177156 |
| H  | 0.668078  | 1.498225  | -2.161501 |
| H  | 1.726187  | 2.698768  | -2.923387 |
| C  | -2.741587 | -2.219189 | 2.402807  |
| C  | -1.530363 | -1.676518 | 3.173031  |
| H  | -1.430727 | -0.585928 | 3.055761  |
| H  | -1.643047 | -1.880865 | 4.248158  |
| H  | -0.597394 | -2.146882 | 2.832645  |
| C  | -2.898681 | -3.712720 | 2.720839  |
| H  | -1.993081 | -4.272025 | 2.439804  |
| H  | -3.064540 | -3.857816 | 3.798528  |
| H  | -3.756012 | -4.164182 | 2.197843  |
| C  | -3.996206 | -1.447461 | 2.830344  |
| H  | -3.901228 | -0.372859 | 2.608099  |
| H  | -4.910557 | -1.820325 | 2.344138  |
| H  | -4.145807 | -1.542674 | 3.916037  |
| H  | -1.608734 | -2.702074 | 0.627957  |
| H  | 0.200005  | 3.394742  | 0.423055  |
| C  | 2.522782  | 2.615052  | 2.571367  |
| H  | 1.630196  | 3.244592  | 2.490039  |
| C  | 2.658589  | 1.870345  | 3.860825  |
| H  | 3.439246  | 1.099103  | 3.792427  |
| H  | 3.014144  | 2.602991  | 4.608782  |

|    |           |           |           |
|----|-----------|-----------|-----------|
| C  | 1.345783  | 1.255822  | 4.349763  |
| H  | 0.549865  | 2.014021  | 4.411071  |
| H  | 1.000681  | 0.451972  | 3.683594  |
| H  | 1.475061  | 0.825652  | 5.351894  |
| N  | 1.407628  | -1.007130 | 1.332005  |
| S  | 1.784336  | -2.528205 | 0.821835  |
| O  | 0.543059  | -3.250443 | 0.639223  |
| O  | 2.851517  | -3.080373 | 1.604364  |
| O  | 2.386383  | -2.185654 | -0.666760 |
| C  | 2.002483  | -2.941510 | -1.789944 |
| H  | 2.901339  | -3.388337 | -2.238991 |
| H  | 1.290670  | -3.735092 | -1.518428 |
| C  | 1.349009  | -2.042090 | -2.843870 |
| Cl | 1.010390  | -3.037824 | -4.270399 |
| Cl | -0.199384 | -1.372597 | -2.216131 |
| Cl | 2.433444  | -0.700303 | -3.272994 |

#### TS4

|                                  |                            |
|----------------------------------|----------------------------|
| ωB97X-D SCF energy:              | -3610.23081408 a.u.        |
| ωB97X-D enthalpy:                | -3609.491363 a.u.          |
| ωB97X-D free energy:             | -3609.622236 a.u.          |
| ωB97X-D SCF energy in solution:  | -3612.84271021 a.u.        |
| ωB97X-D enthalpy in solution:    | -3612.103259 a.u.          |
| ωB97X-D free energy in solution: | -3612.234132 a.u.          |
| Imaginary frequency:             | -223.8201 cm <sup>-1</sup> |

#### Cartesian coordinates

| ATOM | X         | Y         | Z         |
|------|-----------|-----------|-----------|
| C    | -3.052551 | 3.635302  | 1.409990  |
| C    | -1.820837 | 2.714779  | 1.583525  |
| N    | -1.920382 | 1.832177  | 0.408127  |
| C    | -2.973221 | 2.147214  | -0.247794 |
| O    | -3.699378 | 3.146131  | 0.224251  |
| C    | -3.473876 | 1.493721  | -1.526421 |
| C    | -3.707059 | 0.015146  | -1.262509 |
| N    | -2.975152 | -0.765461 | -0.558056 |
| C    | -3.604915 | -2.090096 | -0.523793 |
| C    | -4.696872 | -1.947116 | -1.606238 |
| O    | -4.753996 | -0.531533 | -1.856292 |
| C    | -2.388341 | 1.624614  | -2.621581 |
| C    | -4.773530 | 2.159494  | -2.000564 |
| H    | -2.797334 | 4.688754  | 1.237331  |
| H    | -3.769269 | 3.574451  | 2.238330  |
| H    | -4.435273 | -2.443746 | -2.550838 |
| H    | -5.695817 | -2.274063 | -1.295065 |

|    |           |           |           |
|----|-----------|-----------|-----------|
| H  | -2.740827 | 1.152192  | -3.548702 |
| H  | -1.437807 | 1.154596  | -2.336235 |
| H  | -2.195592 | 2.687074  | -2.823943 |
| H  | -5.574833 | 2.067403  | -1.256542 |
| H  | -4.596019 | 3.226423  | -2.183051 |
| H  | -5.109320 | 1.692339  | -2.933799 |
| Ag | -0.943127 | -0.138640 | 0.055145  |
| N  | 0.102077  | -2.005717 | 0.104670  |
| C  | 1.226068  | -1.510526 | -0.353317 |
| O  | 2.292087  | -2.150919 | -0.760941 |
| C  | 2.194928  | -3.501313 | -1.225264 |
| C  | 2.097883  | -4.473388 | -0.058032 |
| C  | 0.873497  | -4.206737 | 0.762595  |
| H  | 3.111823  | -3.660561 | -1.804434 |
| H  | 1.323827  | -3.579130 | -1.894363 |
| H  | 2.061949  | -5.493810 | -0.468221 |
| H  | 3.013155  | -4.397053 | 0.546686  |
| H  | -0.052555 | -4.698671 | 0.452017  |
| C  | -4.114159 | -2.454042 | 0.897161  |
| C  | -2.920312 | -2.500393 | 1.859167  |
| H  | -3.238065 | -2.867683 | 2.846345  |
| H  | -2.135992 | -3.170604 | 1.476677  |
| H  | -2.472476 | -1.505007 | 2.005960  |
| C  | -4.751657 | -3.849177 | 0.837640  |
| H  | -5.081338 | -4.160653 | 1.839636  |
| H  | -5.636418 | -3.879810 | 0.183903  |
| H  | -4.034100 | -4.601293 | 0.473021  |
| C  | -5.133182 | -1.423472 | 1.397785  |
| H  | -5.485417 | -1.694993 | 2.403833  |
| H  | -4.685568 | -0.419502 | 1.464104  |
| H  | -6.021120 | -1.361581 | 0.749951  |
| C  | -0.464553 | 3.449845  | 1.717501  |
| C  | -0.146596 | 4.246991  | 0.448229  |
| H  | -0.053752 | 3.584650  | -0.423930 |
| H  | -0.906251 | 5.015167  | 0.233717  |
| H  | 0.813818  | 4.770534  | 0.564764  |
| C  | 0.647904  | 2.424132  | 1.970242  |
| H  | 1.593122  | 2.938708  | 2.198997  |
| H  | 0.408297  | 1.776683  | 2.830178  |
| H  | 0.835889  | 1.792407  | 1.092805  |
| C  | -0.556141 | 4.383846  | 2.933778  |
| H  | -0.800836 | 3.825927  | 3.852015  |
| H  | 0.409337  | 4.884466  | 3.097181  |
| H  | -1.310175 | 5.175439  | 2.803982  |
| H  | -1.941888 | 2.086182  | 2.482552  |
| H  | -2.856804 | -2.842101 | -0.818503 |

|    |           |           |           |
|----|-----------|-----------|-----------|
| C  | 0.829646  | -3.423576 | 1.874725  |
| H  | -0.136513 | -3.345264 | 2.383988  |
| C  | 1.961049  | -2.708215 | 2.542793  |
| H  | 2.323850  | -3.371181 | 3.349984  |
| H  | 2.809521  | -2.570180 | 1.856175  |
| C  | 1.548050  | -1.365760 | 3.147238  |
| H  | 0.695548  | -1.482768 | 3.834123  |
| H  | 2.379179  | -0.929502 | 3.718192  |
| H  | 1.263581  | -0.643294 | 2.368063  |
| N  | 1.197499  | -0.161493 | -0.378114 |
| S  | 1.625510  | 0.613016  | -1.789581 |
| O  | 1.429173  | 2.025968  | -1.564751 |
| O  | 1.022379  | -0.060857 | -2.914121 |
| O  | 3.201480  | 0.312498  | -1.911243 |
| C  | 4.179080  | 1.206472  | -1.417740 |
| H  | 4.886395  | 1.391261  | -2.237759 |
| H  | 3.727324  | 2.158356  | -1.102405 |
| C  | 4.965871  | 0.605826  | -0.246675 |
| Cl | 5.605037  | -0.995916 | -0.677360 |
| Cl | 6.305040  | 1.727598  | 0.093432  |
| Cl | 3.938409  | 0.462965  | 1.207959  |

### TS1'

|                                  |                            |
|----------------------------------|----------------------------|
| ωB97X-D SCF energy:              | -3832.56297147 a.u.        |
| ωB97X-D enthalpy:                | -3831.895943 a.u.          |
| ωB97X-D free energy:             | -3832.020929 a.u.          |
| ωB97X-D SCF energy in solution:  | -3835.40524021 a.u.        |
| ωB97X-D enthalpy in solution:    | -3834.738212 a.u.          |
| ωB97X-D free energy in solution: | -3834.863198 a.u.          |
| Imaginary frequency:             | -231.8408 cm <sup>-1</sup> |

### Cartesian coordinates

| ATOM | X         | Y         | Z        |
|------|-----------|-----------|----------|
| Ag   | -0.656082 | 0.025413  | 0.197031 |
| N    | 1.099928  | 0.716071  | 1.386077 |
| C    | 1.729552  | -0.432307 | 1.186860 |
| O    | 2.820448  | -0.901402 | 1.737162 |
| C    | 4.076823  | 0.961837  | 2.649868 |
| C    | 3.164415  | 1.906151  | 1.933935 |
| H    | 4.417880  | 1.381232  | 3.611041 |
| H    | 4.966535  | 0.762822  | 2.037980 |
| H    | 3.411898  | 2.159670  | 0.899214 |
| C    | 3.362234  | -0.355078 | 2.933504 |
| H    | 4.060111  | -1.116562 | 3.300140 |
| H    | 2.550385  | -0.234050 | 3.666314 |

|   |           |           |           |
|---|-----------|-----------|-----------|
| C | 2.010112  | 2.423906  | 2.445210  |
| H | 1.464648  | 3.105823  | 1.786520  |
| C | 1.527715  | 2.386852  | 3.862062  |
| H | 0.543558  | 1.890434  | 3.876055  |
| H | 2.193594  | 1.783750  | 4.496334  |
| C | 1.398630  | 3.799755  | 4.436932  |
| H | 2.368891  | 4.317262  | 4.452230  |
| H | 0.702446  | 4.410690  | 3.841648  |
| H | 1.017541  | 3.763689  | 5.466700  |
| O | -3.355374 | 3.385628  | -0.232909 |
| N | -1.766411 | 1.891290  | 0.173375  |
| C | -2.387839 | 4.150584  | 0.521151  |
| H | -2.849770 | 4.373897  | 1.492378  |
| C | -1.941006 | 5.393228  | -0.247136 |
| H | -1.769303 | 6.228095  | 0.450604  |
| H | -2.717810 | 5.720134  | -0.953476 |
| C | -0.657947 | 4.966037  | -0.916832 |
| C | 0.075054  | 5.644578  | -1.888339 |
| H | -0.265756 | 6.609634  | -2.269712 |
| C | 1.249289  | 5.070611  | -2.374573 |
| H | 1.829251  | 5.591036  | -3.139285 |
| C | 1.686194  | 3.831477  | -1.897936 |
| H | 2.600878  | 3.388397  | -2.297286 |
| C | 0.956111  | 3.152251  | -0.923423 |
| H | 1.288820  | 2.180393  | -0.552835 |
| C | -0.214236 | 3.732502  | -0.434810 |
| C | -1.187808 | 3.174517  | 0.584758  |
| H | -0.753464 | 3.073136  | 1.589690  |
| C | -2.929583 | 2.128379  | -0.315572 |
| C | -3.866885 | 1.197543  | -0.979275 |
| C | -4.711779 | 1.798206  | -2.116388 |
| H | -4.483575 | 2.832308  | -2.378070 |
| H | -4.907669 | 1.125571  | -2.952621 |
| O | -4.473402 | -0.977773 | -1.677786 |
| N | -2.466192 | -0.851998 | -0.732878 |
| C | -3.985083 | -2.336516 | -1.793948 |
| H | -3.830848 | -2.525870 | -2.864467 |
| C | -4.946935 | -3.318770 | -1.125982 |
| H | -4.978767 | -4.261004 | -1.695566 |
| H | -5.971005 | -2.918149 | -1.109060 |
| C | -4.353522 | -3.536472 | 0.244480  |
| C | -4.910909 | -4.207672 | 1.330544  |
| H | -5.916666 | -4.629357 | 1.268612  |
| C | -4.162171 | -4.339399 | 2.499805  |
| H | -4.586864 | -4.864758 | 3.357625  |
| C | -2.868821 | -3.815985 | 2.579628  |



|    |           |           |           |
|----|-----------|-----------|-----------|
| H  | -2.286274 | -3.942465 | 3.494050  |
| C  | -2.310229 | -3.144442 | 1.493153  |
| H  | -1.289872 | -2.762734 | 1.559219  |
| C  | -3.065782 | -3.003638 | 0.332011  |
| C  | -2.687357 | -2.291620 | -0.948980 |
| H  | -1.805201 | -2.735402 | -1.430453 |
| C  | -3.526985 | -0.239830 | -1.106730 |
| C  | -5.361933 | 1.521639  | -0.823716 |
| H  | -6.020185 | 0.655799  | -0.745167 |
| H  | -5.593488 | 2.361154  | -0.167136 |
| N  | 1.089914  | -1.172789 | 0.272549  |
| S  | 1.259525  | -2.806623 | 0.151461  |
| O  | 0.435943  | -3.208149 | -0.966944 |
| O  | 1.174225  | -3.459809 | 1.429790  |
| O  | 2.814385  | -2.936268 | -0.270247 |
| C  | 3.234010  | -2.724392 | -1.599230 |
| H  | 3.729835  | -3.644207 | -1.940015 |
| H  | 2.387720  | -2.507126 | -2.267733 |
| C  | 4.266487  | -1.590983 | -1.701745 |
| Cl | 4.946062  | -1.668980 | -3.344772 |
| Cl | 3.514396  | 0.025319  | -1.481528 |
| Cl | 5.550517  | -1.801941 | -0.494253 |

## TS2'

|                                          |                            |
|------------------------------------------|----------------------------|
| $\omega$ B97X-D SCF energy:              | -3832.57030193 a.u.        |
| $\omega$ B97X-D enthalpy:                | -3831.903709 a.u.          |
| $\omega$ B97X-D free energy:             | -3832.027657 a.u.          |
| $\omega$ B97X-D SCF energy in solution:  | -3835.40729012 a.u.        |
| $\omega$ B97X-D enthalpy in solution:    | -3834.740697 a.u.          |
| $\omega$ B97X-D free energy in solution: | -3834.864645 a.u.          |
| Imaginary frequency:                     | -196.7800 cm <sup>-1</sup> |

## Cartesian coordinates

| ATOM | X        | Y        | Z         |
|------|----------|----------|-----------|
| Ag   | 0.021461 | 0.414882 | -0.505618 |
| N    | 1.555920 | 1.892754 | -1.008749 |
| C    | 1.319732 | 2.587467 | 0.078659  |
| O    | 1.638290 | 3.837918 | 0.329432  |
| C    | 1.733072 | 4.767618 | -0.761100 |
| C    | 3.049946 | 4.619566 | -1.508923 |
| C    | 3.216140 | 3.230318 | -2.044805 |
| H    | 1.648511 | 5.755346 | -0.293295 |
| H    | 0.870017 | 4.609550 | -1.426736 |
| H    | 3.050883 | 5.346267 | -2.335311 |
| H    | 3.874933 | 4.890710 | -0.834674 |

|   |           |           |           |
|---|-----------|-----------|-----------|
| H | 2.784803  | 3.019532  | -3.026630 |
| C | 3.894489  | 2.227194  | -1.421288 |
| H | 3.945942  | 1.264249  | -1.940859 |
| C | 4.625894  | 2.287961  | -0.119596 |
| H | 4.679332  | 3.317730  | 0.261106  |
| H | 4.036777  | 1.725343  | 0.627875  |
| C | 6.022082  | 1.669798  | -0.214783 |
| H | 6.522646  | 1.698421  | 0.762839  |
| H | 5.967104  | 0.618488  | -0.536096 |
| H | 6.651752  | 2.215090  | -0.932742 |
| O | -3.549698 | -2.056424 | -0.400399 |
| N | -1.981235 | -0.485405 | -0.352178 |
| C | -4.268367 | -0.911485 | 0.115511  |
| H | -4.568434 | -1.161269 | 1.140975  |
| C | -5.444969 | -0.547779 | -0.794668 |
| H | -6.318508 | -0.257925 | -0.189937 |
| H | -5.748393 | -1.411128 | -1.404713 |
| C | -4.939333 | 0.619112  | -1.607725 |
| C | -5.551658 | 1.248826  | -2.689523 |
| H | -6.509112 | 0.890752  | -3.074467 |
| C | -4.924258 | 2.348378  | -3.274459 |
| H | -5.393595 | 2.849868  | -4.123276 |
| C | -3.706227 | 2.822073  | -2.777905 |
| H | -3.237484 | 3.694186  | -3.238043 |
| C | -3.094916 | 2.195941  | -1.692837 |
| H | -2.160157 | 2.579306  | -1.277688 |
| C | -3.718136 | 1.088862  | -1.122646 |
| C | -3.216133 | 0.223980  | 0.010675  |
| H | -3.058145 | 0.781148  | 0.943864  |
| C | -2.287935 | -1.699759 | -0.611397 |
| C | -1.402495 | -2.785272 | -1.097781 |
| C | -2.076255 | -4.086494 | -1.527587 |
| H | -3.165837 | -4.070234 | -1.531359 |
| H | -1.601598 | -4.610467 | -2.357082 |
| O | 0.470337  | -3.452326 | -2.391153 |
| N | 0.530461  | -1.336903 | -1.723052 |
| C | 1.680002  | -2.956593 | -3.010666 |
| H | 1.485633  | -2.903848 | -4.090554 |
| C | 2.878680  | -3.824800 | -2.637972 |
| H | 3.603375  | -3.842087 | -3.467566 |
| H | 2.573321  | -4.864986 | -2.454583 |
| C | 3.452912  | -3.137491 | -1.423701 |
| C | 4.412113  | -3.612369 | -0.531834 |
| H | 4.847752  | -4.605723 | -0.659885 |
| C | 4.803505  | -2.804745 | 0.536044  |
| H | 5.549665  | -3.169244 | 1.244808  |

|    |           |           |           |
|----|-----------|-----------|-----------|
| C  | 4.241296  | -1.537616 | 0.711828  |
| H  | 4.547506  | -0.920809 | 1.559445  |
| C  | 3.285872  | -1.059015 | -0.184100 |
| H  | 2.836819  | -0.074805 | -0.043891 |
| C  | 2.901159  | -1.865613 | -1.252588 |
| C  | 1.850108  | -1.586834 | -2.311336 |
| H  | 2.123503  | -0.765128 | -2.988626 |
| C  | -0.115484 | -2.446365 | -1.748480 |
| C  | -1.377483 | -4.057358 | -0.227564 |
| H  | -0.406911 | -4.548785 | -0.135818 |
| H  | -1.962150 | -4.001578 | 0.692737  |
| N  | 0.623134  | 1.858550  | 0.969325  |
| S  | -0.558614 | 2.540569  | 1.919950  |
| O  | -1.605515 | 3.110022  | 1.109189  |
| O  | 0.048257  | 3.256091  | 3.011533  |
| O  | -1.190660 | 1.156856  | 2.487550  |
| C  | -0.592048 | 0.521440  | 3.598824  |
| H  | 0.433825  | 0.880428  | 3.768412  |
| H  | -1.192664 | 0.724219  | 4.497373  |
| C  | -0.552150 | -0.996010 | 3.394792  |
| Cl | -2.184205 | -1.623749 | 3.034453  |
| Cl | 0.564006  | -1.459165 | 2.075855  |
| Cl | 0.034145  | -1.704078 | 4.915352  |

### TS3'

|                                          |                            |
|------------------------------------------|----------------------------|
| $\omega$ B97X-D SCF energy:              | -3610.22412408 a.u.        |
| $\omega$ B97X-D enthalpy:                | -3609.484255 a.u.          |
| $\omega$ B97X-D free energy:             | -3609.614572 a.u.          |
| $\omega$ B97X-D SCF energy in solution:  | -3612.83834535 a.u.        |
| $\omega$ B97X-D enthalpy in solution:    | -3612.098476 a.u.          |
| $\omega$ B97X-D free energy in solution: | -3612.228793 a.u.          |
| Imaginary frequency:                     | -185.6274 cm <sup>-1</sup> |

### Cartesian coordinates

| ATOM | X         | Y         | Z         |
|------|-----------|-----------|-----------|
| C    | -3.318113 | -3.544241 | -0.852234 |
| C    | -2.304716 | -2.958472 | 0.142518  |
| N    | -2.426544 | -1.514368 | -0.133718 |
| C    | -3.514921 | -1.329367 | -0.778234 |
| O    | -4.164400 | -2.421076 | -1.164710 |
| C    | -4.223363 | -0.044944 | -1.143180 |
| C    | -3.511924 | 1.220053  | -0.711871 |
| N    | -2.273374 | 1.428268  | -0.447953 |
| C    | -2.062891 | 2.884884  | -0.380509 |
| C    | -3.504689 | 3.392550  | -0.226674 |

|    |           |           |           |
|----|-----------|-----------|-----------|
| O  | -4.291807 | 2.294667  | -0.713672 |
| C  | -5.625549 | -0.092390 | -0.495790 |
| C  | -4.349207 | 0.023932  | -2.685379 |
| H  | -3.949374 | -4.346127 | -0.453700 |
| H  | -2.849899 | -3.882313 | -1.788045 |
| H  | -3.787865 | 3.569502  | 0.821445  |
| H  | -3.749785 | 4.280108  | -0.820050 |
| H  | -6.208404 | 0.784658  | -0.800581 |
| H  | -5.555332 | -0.100998 | 0.601520  |
| H  | -6.149770 | -0.999508 | -0.819168 |
| H  | -4.859178 | 0.950920  | -2.979158 |
| H  | -3.359094 | -0.005141 | -3.162913 |
| H  | -4.936302 | -0.831634 | -3.042660 |
| Ag | -0.788160 | -0.056751 | 0.181773  |
| N  | 0.758610  | 1.190320  | 1.148126  |
| C  | 1.643972  | 0.210300  | 1.118681  |
| O  | 2.819769  | 0.114210  | 1.683010  |
| C  | 3.599613  | 2.355821  | 2.195020  |
| C  | 2.455221  | 2.941206  | 1.427319  |
| H  | 3.879617  | 2.995270  | 3.048649  |
| H  | 4.480692  | 2.263401  | 1.546168  |
| H  | 2.587487  | 3.068201  | 0.349231  |
| C  | 3.234675  | 0.978568  | 2.735337  |
| H  | 4.104935  | 0.481064  | 3.178486  |
| H  | 2.433027  | 1.029623  | 3.487493  |
| C  | -1.305852 | 3.436610  | -1.624130 |
| C  | -1.009649 | 4.920539  | -1.363989 |
| H  | -0.480430 | 5.360509  | -2.221745 |
| H  | -1.925333 | 5.511969  | -1.210059 |
| H  | -0.369855 | 5.052821  | -0.476520 |
| C  | -2.140729 | 3.285489  | -2.902850 |
| H  | -2.384276 | 2.230987  | -3.100623 |
| H  | -3.079940 | 3.857507  | -2.871499 |
| H  | -1.568540 | 3.652454  | -3.767465 |
| C  | 0.020591  | 2.689388  | -1.814730 |
| H  | 0.617101  | 2.675615  | -0.892110 |
| H  | -0.140215 | 1.644372  | -2.119602 |
| H  | 0.613993  | 3.173371  | -2.604589 |
| C  | -2.582855 | -3.279993 | 1.638870  |
| C  | -1.648670 | -2.454157 | 2.533604  |
| H  | -1.874801 | -1.377323 | 2.473474  |
| H  | -1.776852 | -2.751943 | 3.584966  |
| H  | -0.590695 | -2.612969 | 2.281226  |
| C  | -2.281194 | -4.769611 | 1.854215  |
| H  | -1.230330 | -4.996245 | 1.616947  |
| H  | -2.456991 | -5.047432 | 2.903856  |

|    |           |           |           |
|----|-----------|-----------|-----------|
| H  | -2.919605 | -5.418654 | 1.234851  |
| C  | -4.035658 | -2.968806 | 2.021782  |
| H  | -4.271062 | -1.903061 | 1.873290  |
| H  | -4.764220 | -3.565152 | 1.452280  |
| H  | -4.198921 | -3.190706 | 3.086719  |
| H  | -1.281724 | -3.280626 | -0.095771 |
| H  | -1.465630 | 3.110166  | 0.514398  |
| C  | 1.248385  | 3.279012  | 1.959170  |
| H  | 0.509397  | 3.683364  | 1.260989  |
| C  | 0.853974  | 3.338359  | 3.400808  |
| H  | 0.073666  | 2.577842  | 3.571872  |
| H  | 1.698592  | 3.076792  | 4.055186  |
| C  | 0.311191  | 4.719695  | 3.774959  |
| H  | 1.070881  | 5.501717  | 3.630561  |
| H  | -0.564839 | 4.983101  | 3.162311  |
| H  | 0.001166  | 4.739950  | 4.828655  |
| N  | 1.183017  | -0.808555 | 0.380254  |
| S  | 1.714025  | -2.359207 | 0.536511  |
| O  | 0.975881  | -3.129626 | -0.441422 |
| O  | 1.809019  | -2.780169 | 1.908668  |
| O  | 3.246100  | -2.219366 | 0.049290  |
| C  | 3.581139  | -2.153955 | -1.319659 |
| H  | 4.258589  | -2.992562 | -1.533295 |
| H  | 2.693652  | -2.239046 | -1.964108 |
| C  | 4.337282  | -0.861261 | -1.662520 |
| Cl | 4.986586  | -1.075025 | -3.306239 |
| Cl | 3.254451  | 0.569587  | -1.666766 |
| Cl | 5.659006  | -0.585931 | -0.509813 |

#### TS4'

|                                          |                            |
|------------------------------------------|----------------------------|
| $\omega$ B97X-D SCF energy:              | -3610.22897853 a.u.        |
| $\omega$ B97X-D enthalpy:                | -3609.489539 a.u.          |
| $\omega$ B97X-D free energy:             | -3609.618823 a.u.          |
| $\omega$ B97X-D SCF energy in solution:  | -3612.84269326 a.u.        |
| $\omega$ B97X-D enthalpy in solution:    | -3612.103254 a.u.          |
| $\omega$ B97X-D free energy in solution: | -3612.232538 a.u.          |
| Imaginary frequency:                     | -211.3519 cm <sup>-1</sup> |

#### Cartesian coordinates

| ATOM | X         | Y         | Z         |
|------|-----------|-----------|-----------|
| C    | -4.346055 | -1.927176 | -1.729653 |
| C    | -3.174590 | -2.224543 | -0.772391 |
| N    | -2.967789 | -0.912119 | -0.135244 |
| C    | -3.972856 | -0.174220 | -0.417211 |
| O    | -4.872119 | -0.674253 | -1.252398 |

|    |           |           |           |
|----|-----------|-----------|-----------|
| C  | -4.277286 | 1.199209  | 0.163995  |
| C  | -3.126741 | 2.142145  | -0.132869 |
| N  | -1.876627 | 1.874907  | -0.067487 |
| C  | -1.134950 | 3.041826  | -0.561307 |
| C  | -2.221924 | 4.133051  | -0.525850 |
| O  | -3.448407 | 3.385268  | -0.458860 |
| C  | -4.388252 | 1.062979  | 1.700717  |
| C  | -5.586635 | 1.755084  | -0.411756 |
| H  | -5.157146 | -2.663913 | -1.708612 |
| H  | -4.023250 | -1.778291 | -2.770051 |
| H  | -2.165953 | 4.765917  | 0.371892  |
| H  | -2.262832 | 4.774542  | -1.413302 |
| H  | -3.470890 | 0.641400  | 2.134539  |
| H  | -5.228362 | 0.400892  | 1.952696  |
| H  | -4.577728 | 2.047815  | 2.150486  |
| H  | -6.408554 | 1.062139  | -0.194165 |
| H  | -5.811645 | 2.727029  | 0.043345  |
| H  | -5.529019 | 1.885446  | -1.499823 |
| Ag | -0.996897 | -0.043789 | 0.585273  |
| N  | 0.767209  | 0.495485  | 1.863189  |
| C  | 1.365925  | -0.665157 | 1.699645  |
| O  | 2.517139  | -1.102227 | 2.131986  |
| C  | 3.490195  | -0.220941 | 2.682032  |
| C  | 3.033763  | 0.322846  | 4.032526  |
| C  | 1.720916  | 1.035039  | 3.912685  |
| H  | 3.687926  | 0.575696  | 1.949166  |
| H  | 4.395241  | -0.829137 | 2.785580  |
| H  | 2.952774  | -0.507467 | 4.746656  |
| H  | 3.819512  | 0.998071  | 4.408839  |
| H  | 0.857359  | 0.610214  | 4.429818  |
| C  | -0.496159 | 2.788111  | -1.956451 |
| C  | 0.341541  | 4.023479  | -2.315707 |
| H  | 0.807646  | 3.894845  | -3.303521 |
| H  | -0.261645 | 4.943334  | -2.360200 |
| H  | 1.149114  | 4.181013  | -1.583411 |
| C  | -1.570369 | 2.541569  | -3.023301 |
| H  | -2.191397 | 1.667796  | -2.769725 |
| H  | -2.233580 | 3.407565  | -3.168385 |
| H  | -1.095847 | 2.331501  | -3.993186 |
| C  | 0.429126  | 1.565222  | -1.894654 |
| H  | 1.116349  | 1.603223  | -1.036442 |
| H  | -0.134648 | 0.621149  | -1.839179 |
| H  | 1.044456  | 1.514036  | -2.805517 |
| C  | -3.443680 | -3.342906 | 0.271792  |
| C  | -2.234874 | -3.464738 | 1.207062  |
| H  | -2.090482 | -2.554887 | 1.808262  |

|    |           |           |           |
|----|-----------|-----------|-----------|
| H  | -2.376247 | -4.305286 | 1.902712  |
| H  | -1.311740 | -3.647006 | 0.639033  |
| C  | -4.698588 | -3.040008 | 1.099738  |
| H  | -4.583543 | -2.105394 | 1.670216  |
| H  | -5.604961 | -2.957078 | 0.479930  |
| H  | -4.876589 | -3.846666 | 1.826208  |
| C  | -3.613369 | -4.667741 | -0.485279 |
| H  | -2.720785 | -4.896390 | -1.088186 |
| H  | -3.757597 | -5.494832 | 0.225442  |
| H  | -4.486803 | -4.662507 | -1.155453 |
| H  | -2.263968 | -2.493433 | -1.326140 |
| H  | -0.322330 | 3.267744  | 0.142224  |
| C  | 1.540533  | 2.199098  | 3.221440  |
| H  | 0.527395  | 2.612582  | 3.202404  |
| C  | 2.600624  | 3.061090  | 2.619612  |
| H  | 2.680903  | 3.938705  | 3.287819  |
| H  | 3.584030  | 2.573261  | 2.649115  |
| C  | 2.286364  | 3.543639  | 1.205991  |
| H  | 3.091759  | 4.189460  | 0.830527  |
| H  | 2.172959  | 2.693527  | 0.518750  |
| H  | 1.355262  | 4.130058  | 1.187830  |
| N  | 0.586466  | -1.477664 | 0.955016  |
| S  | 1.207879  | -2.224174 | -0.368488 |
| O  | 0.130681  | -2.397660 | -1.319387 |
| O  | 2.064941  | -3.332039 | -0.038938 |
| O  | 2.144011  | -0.983494 | -0.894906 |
| C  | 3.087220  | -1.213719 | -1.915334 |
| H  | 3.221405  | -2.288492 | -2.113526 |
| H  | 2.759600  | -0.705531 | -2.834014 |
| C  | 4.441059  | -0.636908 | -1.495621 |
| Cl | 5.531078  | -0.756232 | -2.890007 |
| Cl | 4.249378  | 1.085422  | -1.029263 |
| Cl | 5.107280  | -1.548295 | -0.123089 |

## VII. References.

1. W. L. F. Armarego, C. L. L. Chai, *Purification of Laboratory Chemicals*, 6th ed., Elsevier, Oxford, UK, **2009**.
2. E. J. Leopold, *Org. Synth.* **1986**, *64*, 164.
3. J. E. M. N. Klein, H. Müller-Bunz, P. Evans, *Org. Biomol. Chem.* **2009**, *7*, 986.
4. J. Trenner, C. Depken, T. Weber, A. Breder, *Angew. Chem. Int. Ed.* **2013**, *52*, 8952.
5. B. V. S. Reddy, P. Borkar, J. S. Yadav, B. Sridhar, R. Grée, *J. Org. Chem.* **2011**, *76*, 7677.
6. M. B. Halle, R. A. Fernandes, *RSC Adv.* **2014**, *4*, 63342.
7. D. Zhang, J. M. Ready, *J. Am. Chem. Soc.* **2006**, *128*, 15050.
8. S. Hatakeyama, H. Irie, T. Shintani, Y. Noguchi, H. Yamada, M. Nishizawa, *Tetrahedron* **1994**, *50*, 13369.
9. M. Kim, J. v. Mulcahy, C. G. Espino, J. du Bois, *Org. Lett.* **2006**, *8*, 1073.
10. Bruker-AXS, *APEX3, Version 2019.11-0*, Madison, Wisconsin, USA, **2019**.
11. Krause, L., Herbst-Irmer, R., Sheldrick, G. M. & Stalke, D. *J. Appl. Cryst.* **2015**, *48*, 3.
12. G. M. Sheldrick, *XPREP, Version 2013/1*, Georg-August-Universität Göttingen, Göttingen, Germany, **2013**.
13. G. M. Sheldrick, The *SHELX* homepage, <http://shelx.uni-ac.gwdg.de/SHELX/>, **2013**.
14. G. M. Sheldrick, *Acta Cryst. A* **2015**, *71*, 3.
15. G. M. Sheldrick, *Acta Cryst. C* **2015**, *71*, 3.
16. O. V. Dolomanov, L. J. Bourhis, R. J. Gildea, J. A. K. Howard, H. Puschmann, *J. Appl. Crystallogr.* **2009**, *42*, 339.
17. I. A. Guzei, Programs *Gn*, University of Wisconsin-Madison, Madison, Wisconsin, USA, **2007-2022**.
18. M. J. Frisch, G. W. Trucks, H. B. Schlegel, G. E. Scuseria, M. A. Robb, J. R. Cheeseman, G. Scalmani, V. Barone, G. A. Petersson, H. Nakatsuji, X. Li, M. Caricato, A. V. Marenich, J. Bloino, B. G. Janesko, R. Gomperts, B. Mennucci, H. P. Hratchian, J. V. Ortiz, A. F. Izmaylov, J. L. Sonnenberg, F. Williams; Ding, F. Lipparini, F. Egidi, J. Goings, B. Peng, A. Petrone, T. Henderson, D. Ranasinghe, V. G. Zakrzewski, J. Gao, N. Rega, G. Zheng, W. Liang, M. Hada, M. Ehara, K. Toyota, R. Fukuda, J. Hasegawa, M. Ishida, T. Nakajima, Y. Honda, O. Kitao, H. Nakai, T. Vreven, K. Throssell, J. A. Montgomery Jr. J. E. Peralta, F. Ogliaro, M. J. Bearpark, J. J. Heyd, E. N. Brothers, K. N. Kudin, V. N. Staroverov, T. A. Keith, R. Kobayashi, J. Normand, K. Raghavachari, A. P. Rendell, J. C. Burant, S. S. Iyengar, J. Tomasi, M. Cossi, J. M. Millam, M. Klene, C. Adamo, R. Cammi, J. W. Ochterski, R. L. Martin, K. Morokuma, O. Farkas, J. B. Foresman, D. J. Fox, *Gaussian 16 Rev. B.01*, Gaussian, Inc.: Wallingford, CT, **2016**.



19. J.-D. Chai, M. Head-Gordon, M. *Phys. Chem. Chem. Phys.* **2008**, *10*, 6615–6620.
20. A. V. Marenich, C. J. Cramer, D. G. Truhlar, *J. Phys. Chem. B* **2009**, *113*, 6378–6396.
21. S. Grimme, *Chem. – A Eur. J.* **2012**, *18*, 9955–9964.
22. Luchini, G.; Alegre-Requena, J. V.; Funes-Ardoiz, I.; Paton, R. S. *FI000Research* **2020**, *9*, 291.
23. CYLview, 1.0b; Legault, C. Y., Université de Sherbrooke, **2009**, (<http://www.cylview.org>)

## VIII. NMR Spectral Data

$^1\text{H}$  NMR (500 MHz,  $\text{CDCl}_3$ ) for **Compound 1a**

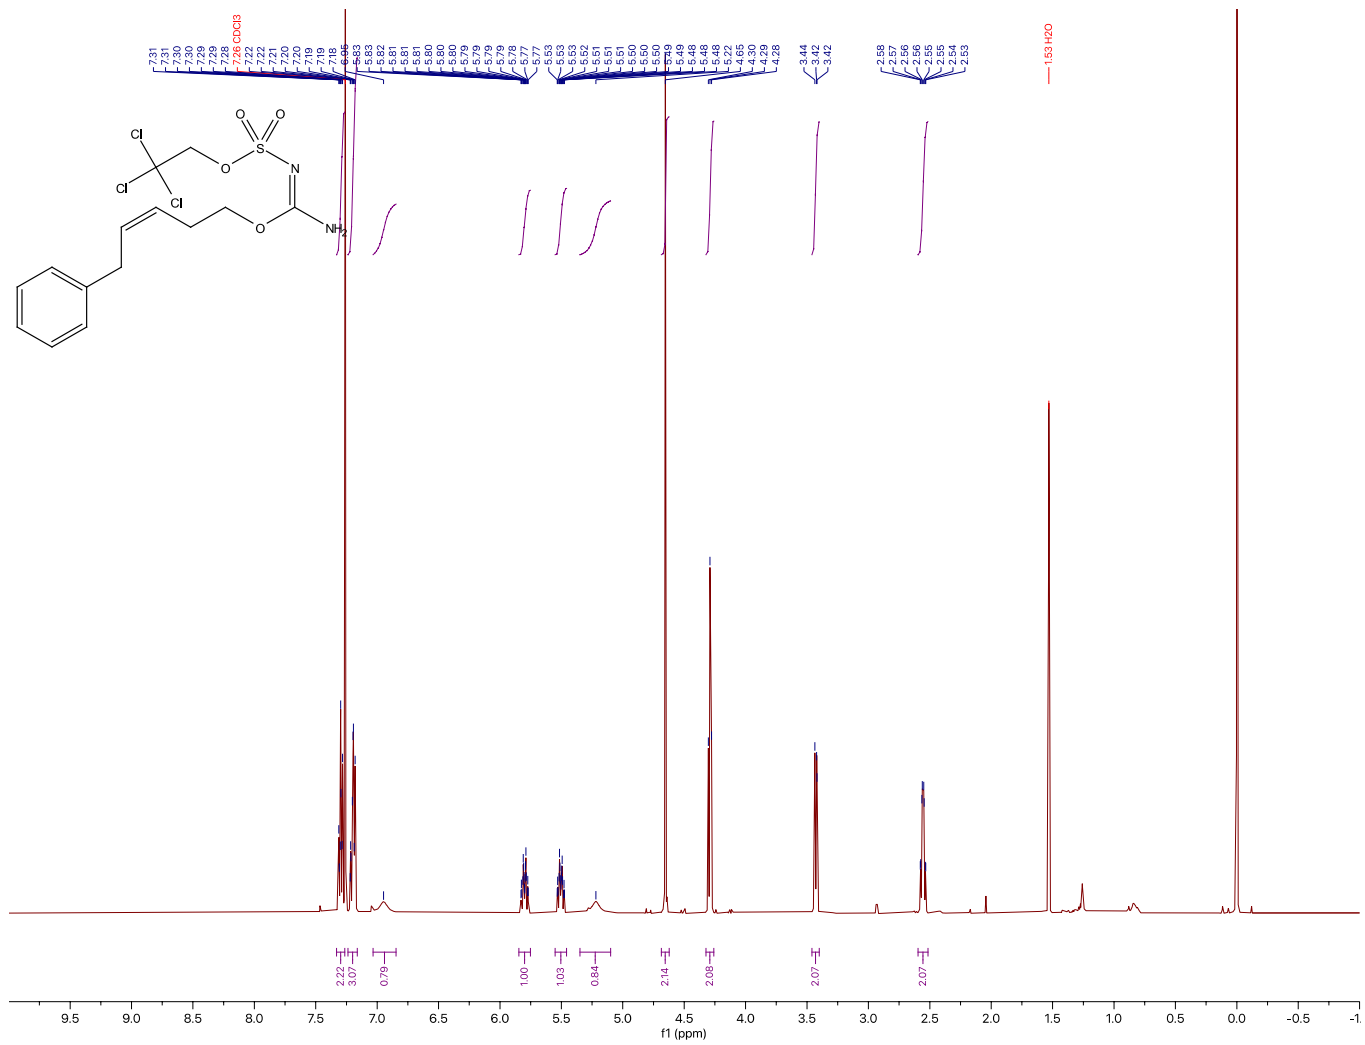

$^{13}\text{C}$  NMR (126 MHz,  $\text{CDCl}_3$ ) for **Compound 1a**

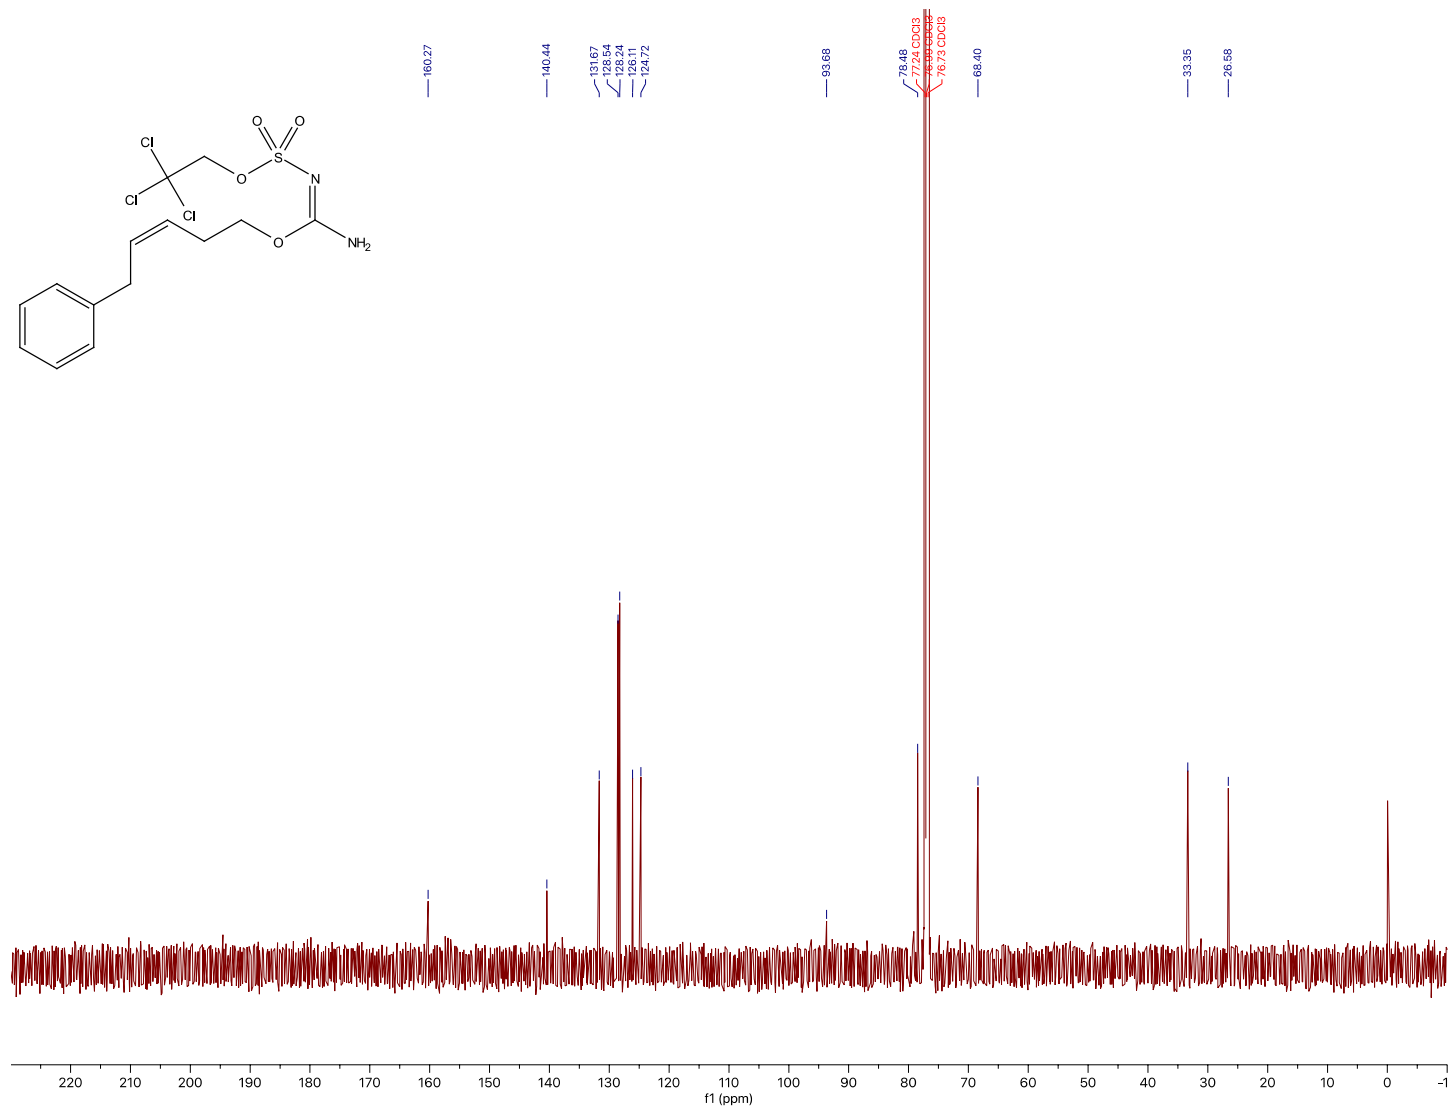

<sup>1</sup>H NMR (500 MHz, CDCl<sub>3</sub>) for Compound 1b

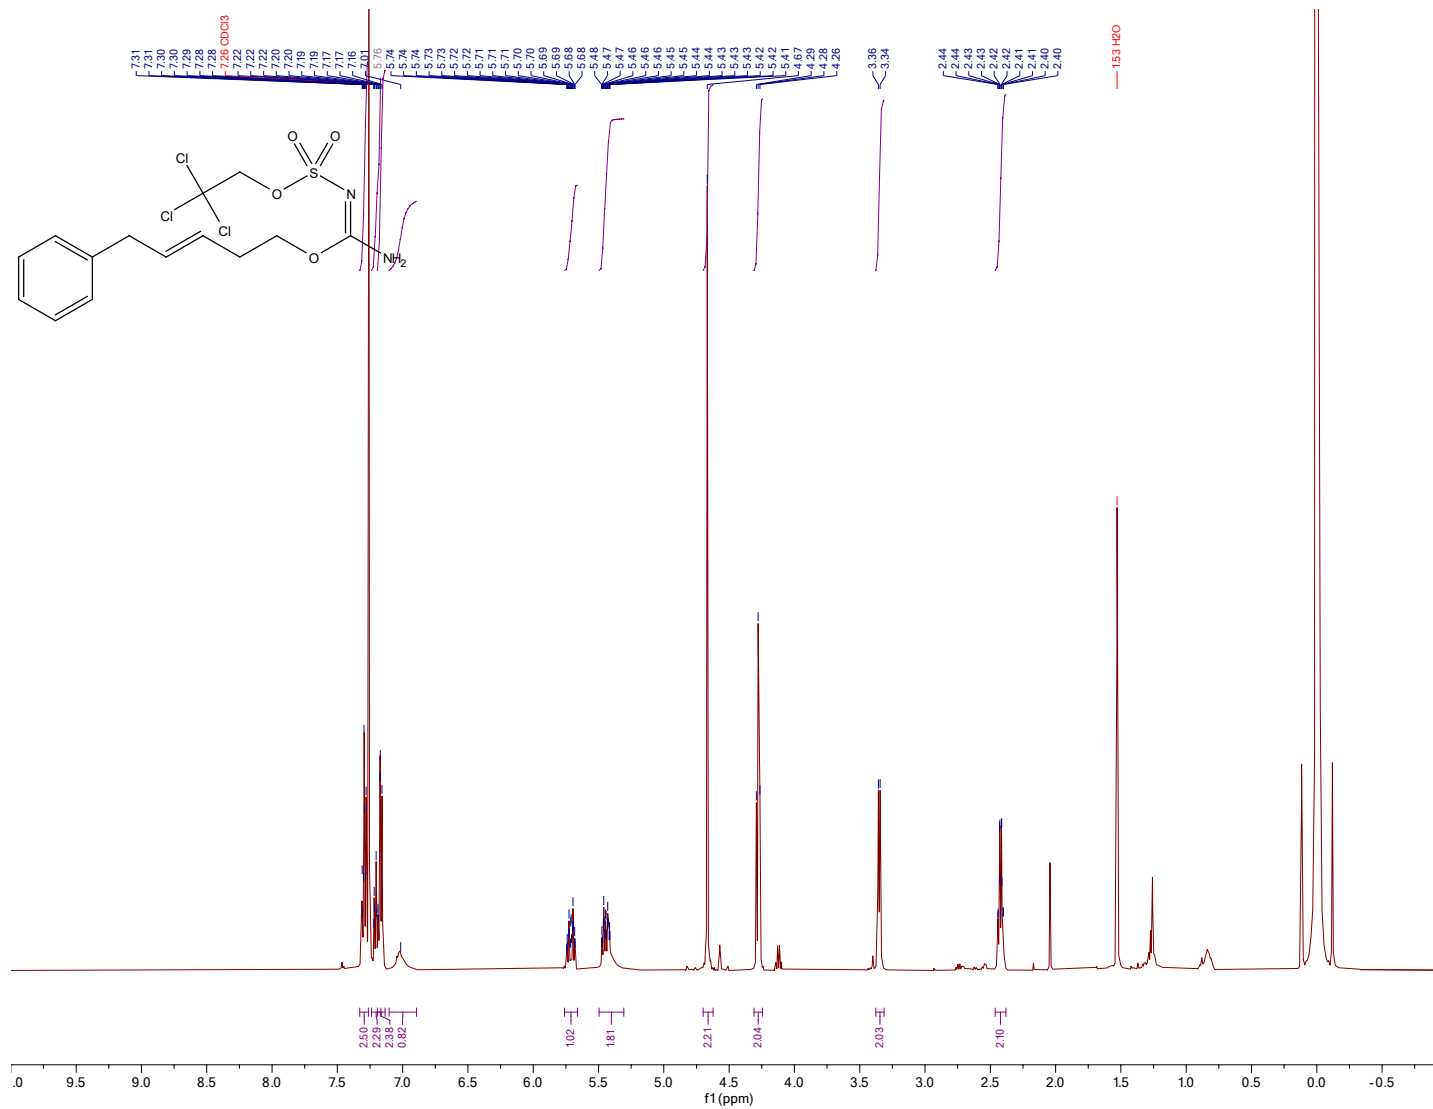

<sup>13</sup>C NMR (126 MHz, CDCl<sub>3</sub>) for **Compound 1b**

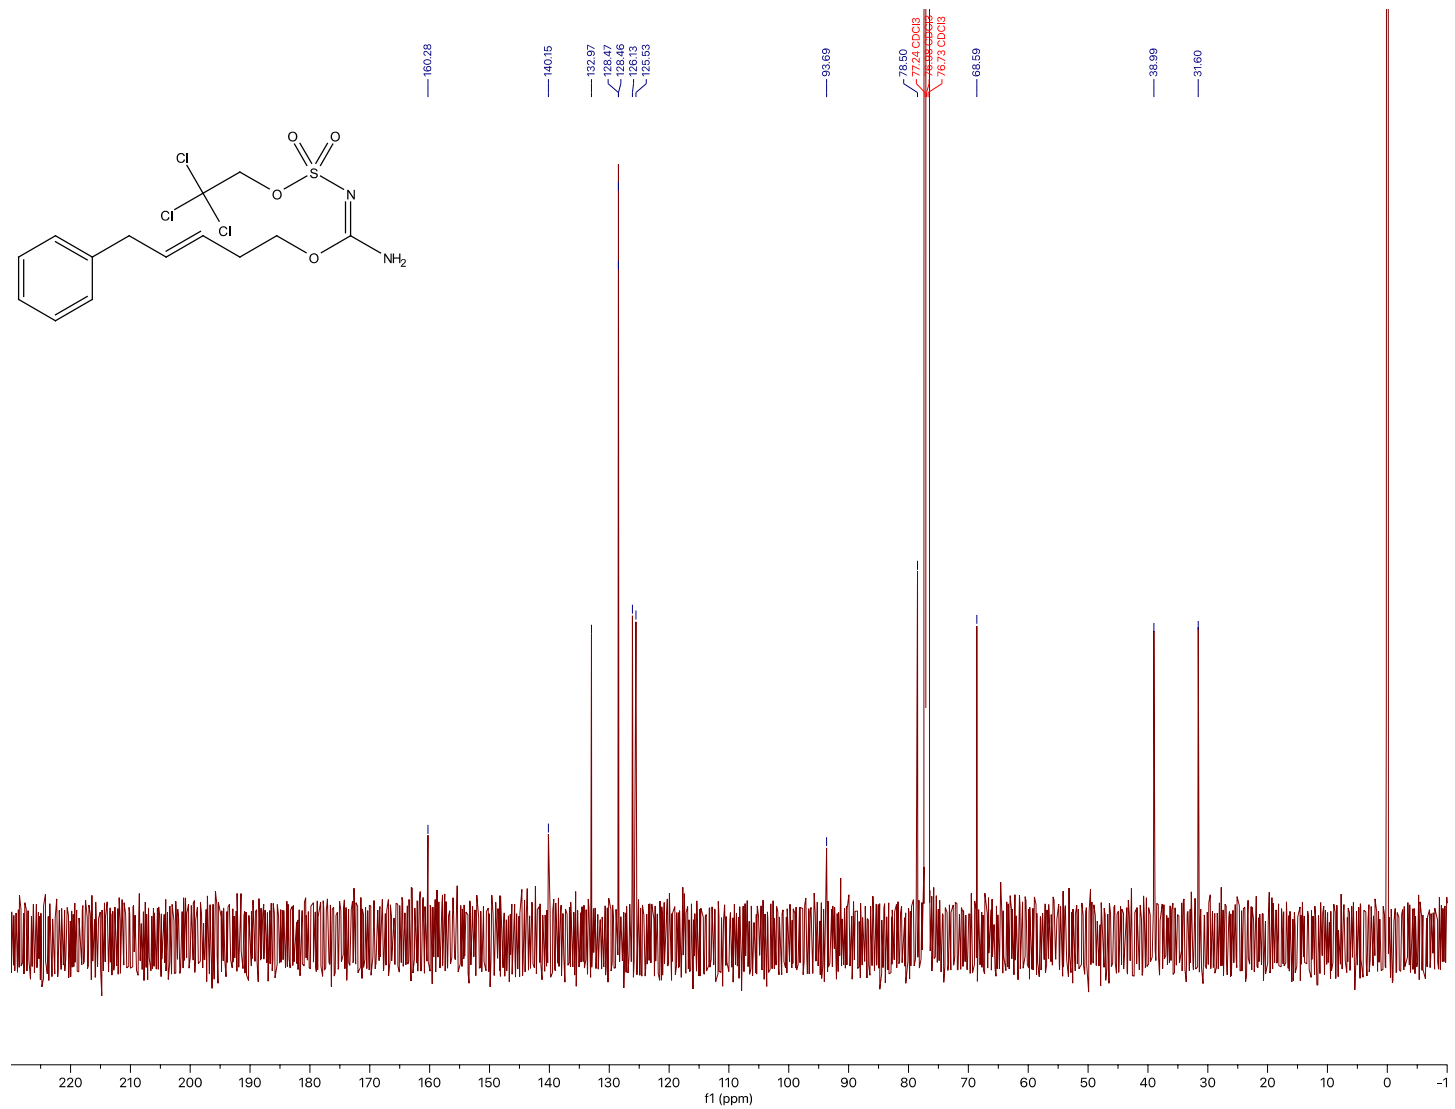

<sup>1</sup>H NMR (500 MHz, CDCl<sub>3</sub>) for Compound 1c

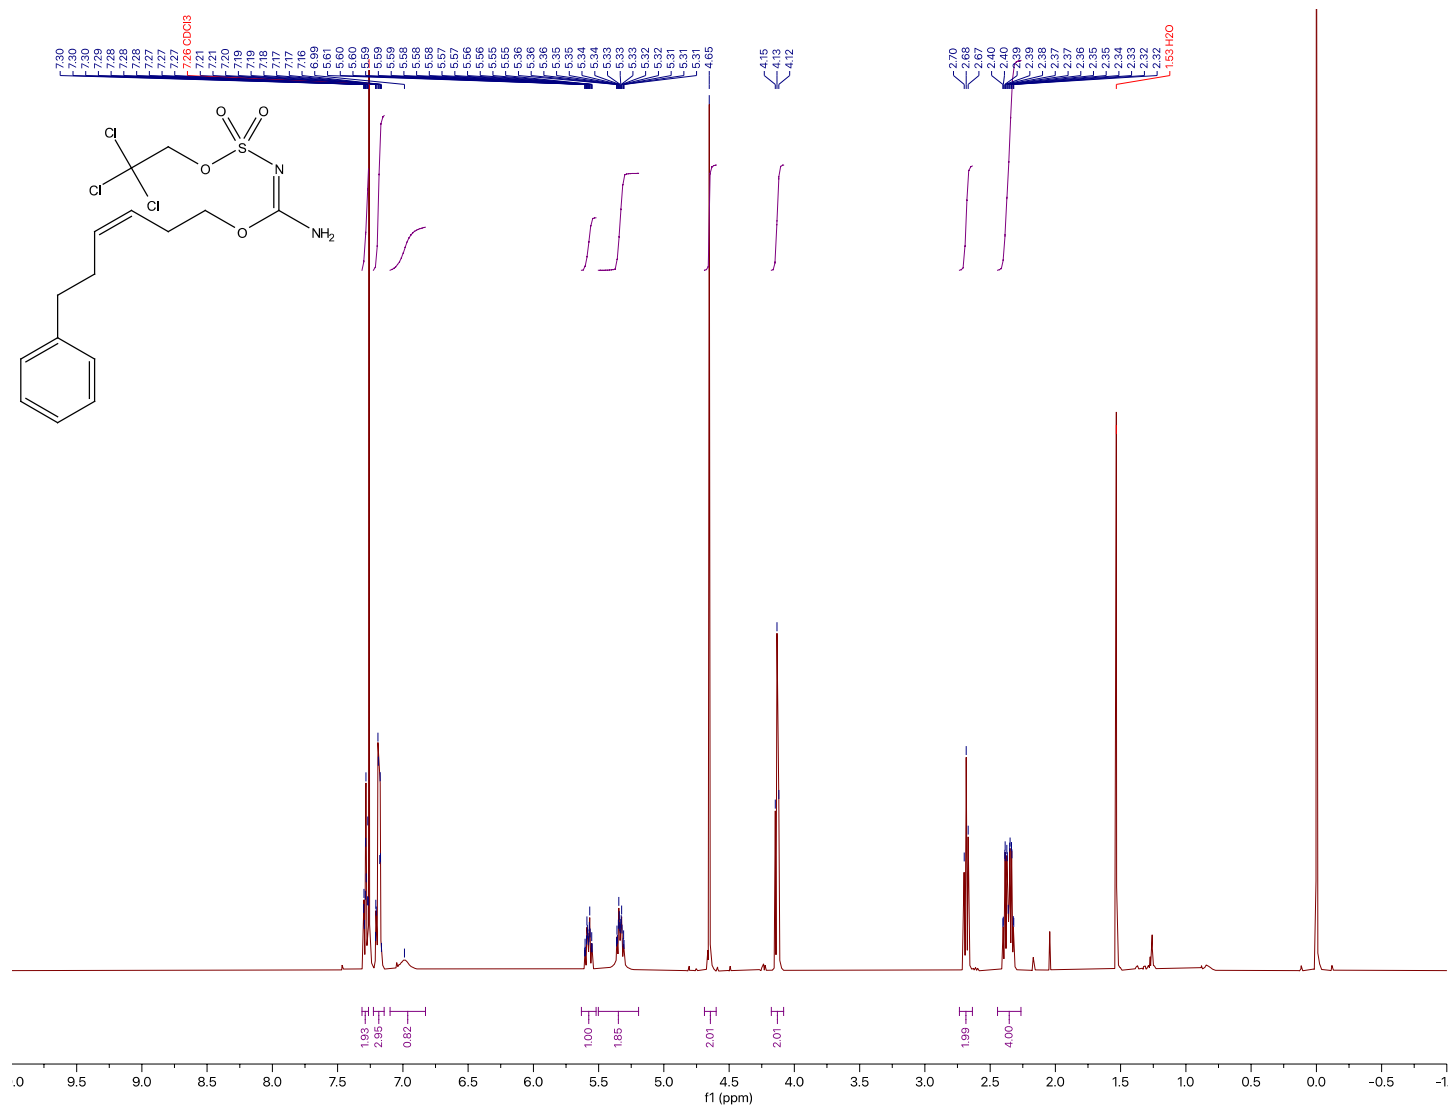

$^{13}\text{C}$  NMR (126 MHz,  $\text{CDCl}_3$ ) for **Compound 1c**

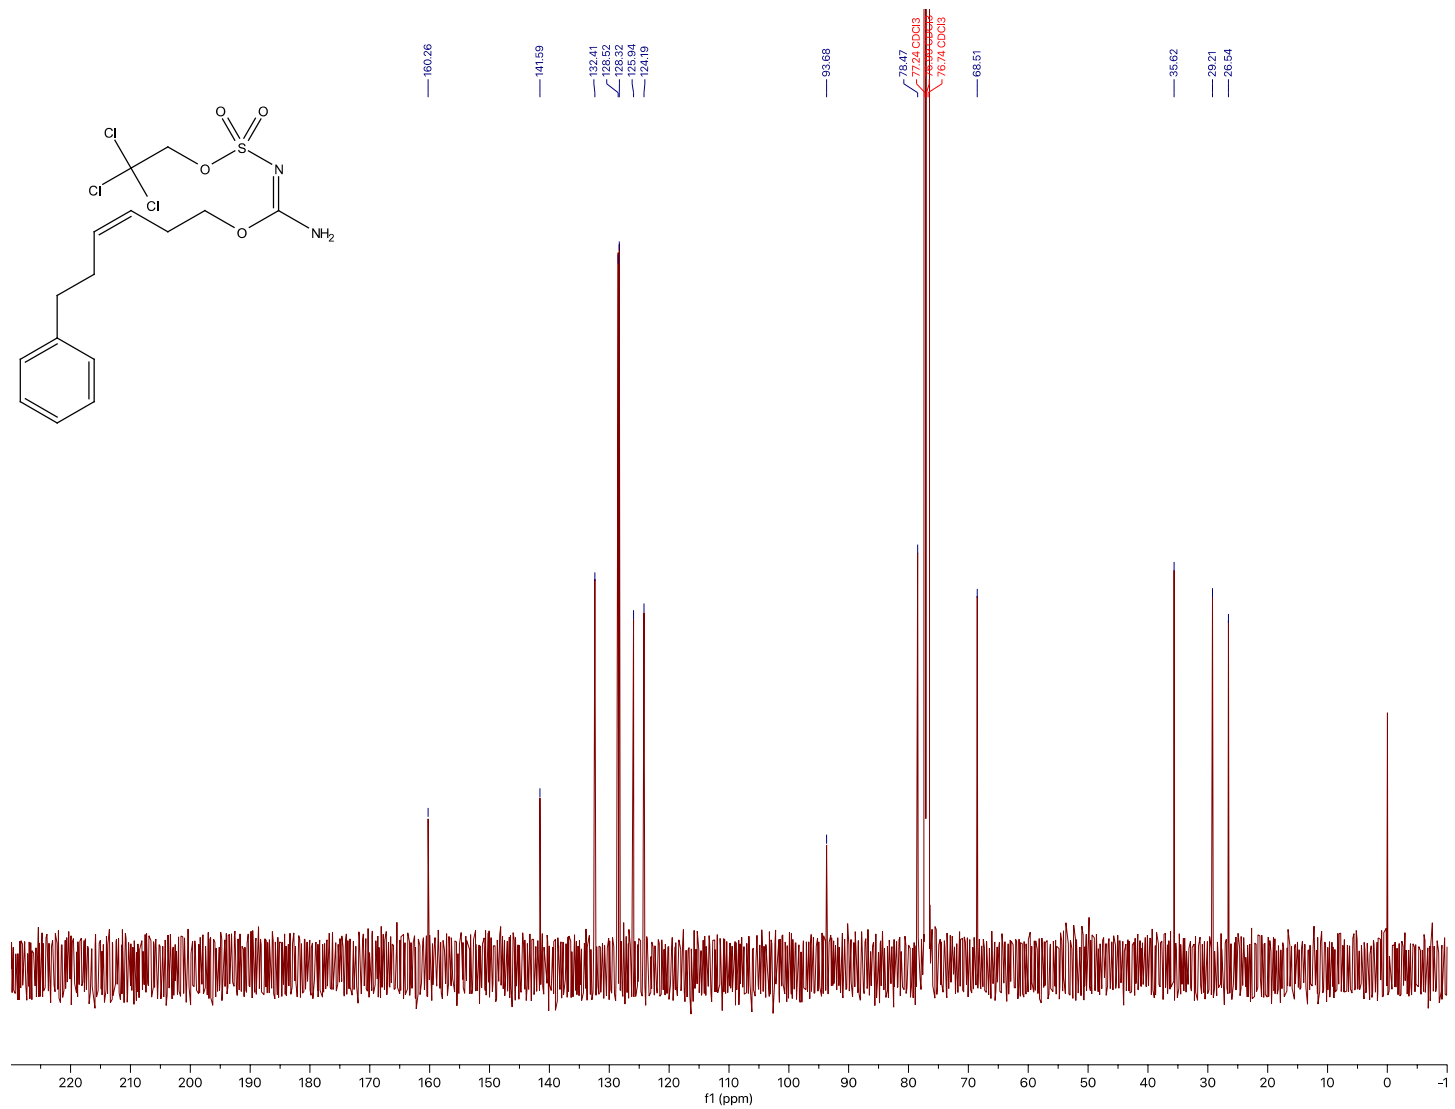

<sup>1</sup>H NMR (500 MHz, CDCl<sub>3</sub>) for Compound 1d

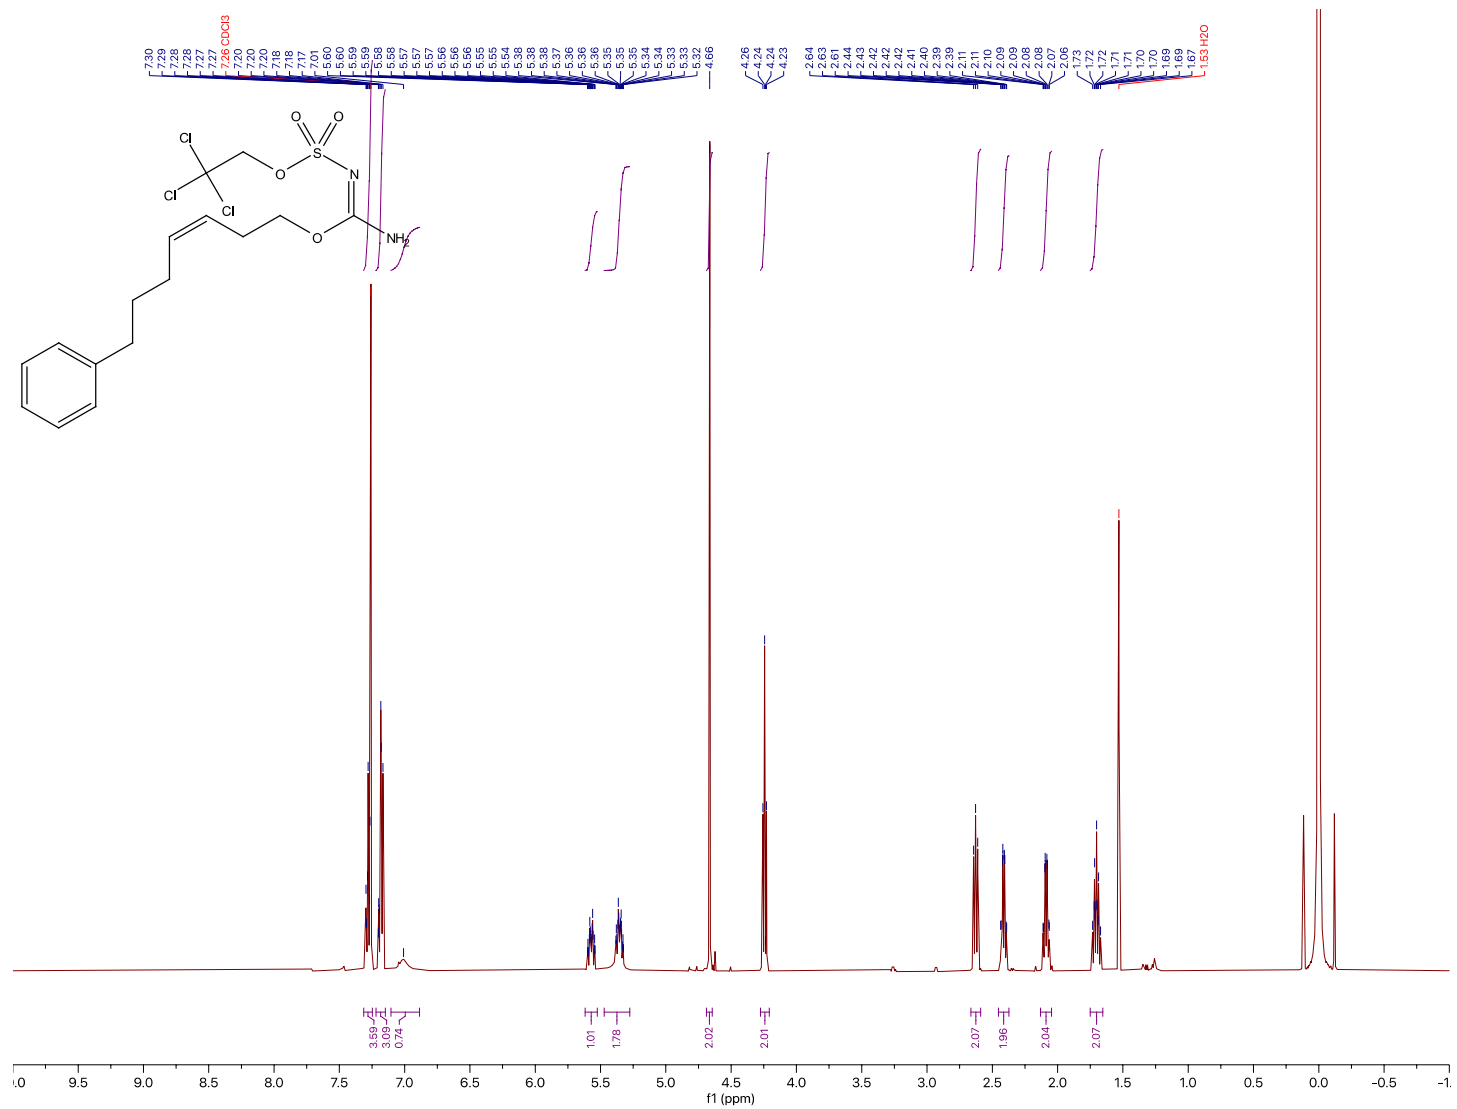



$^{13}\text{C}$  NMR (126 MHz,  $\text{CDCl}_3$ ) for **Compound 1d**

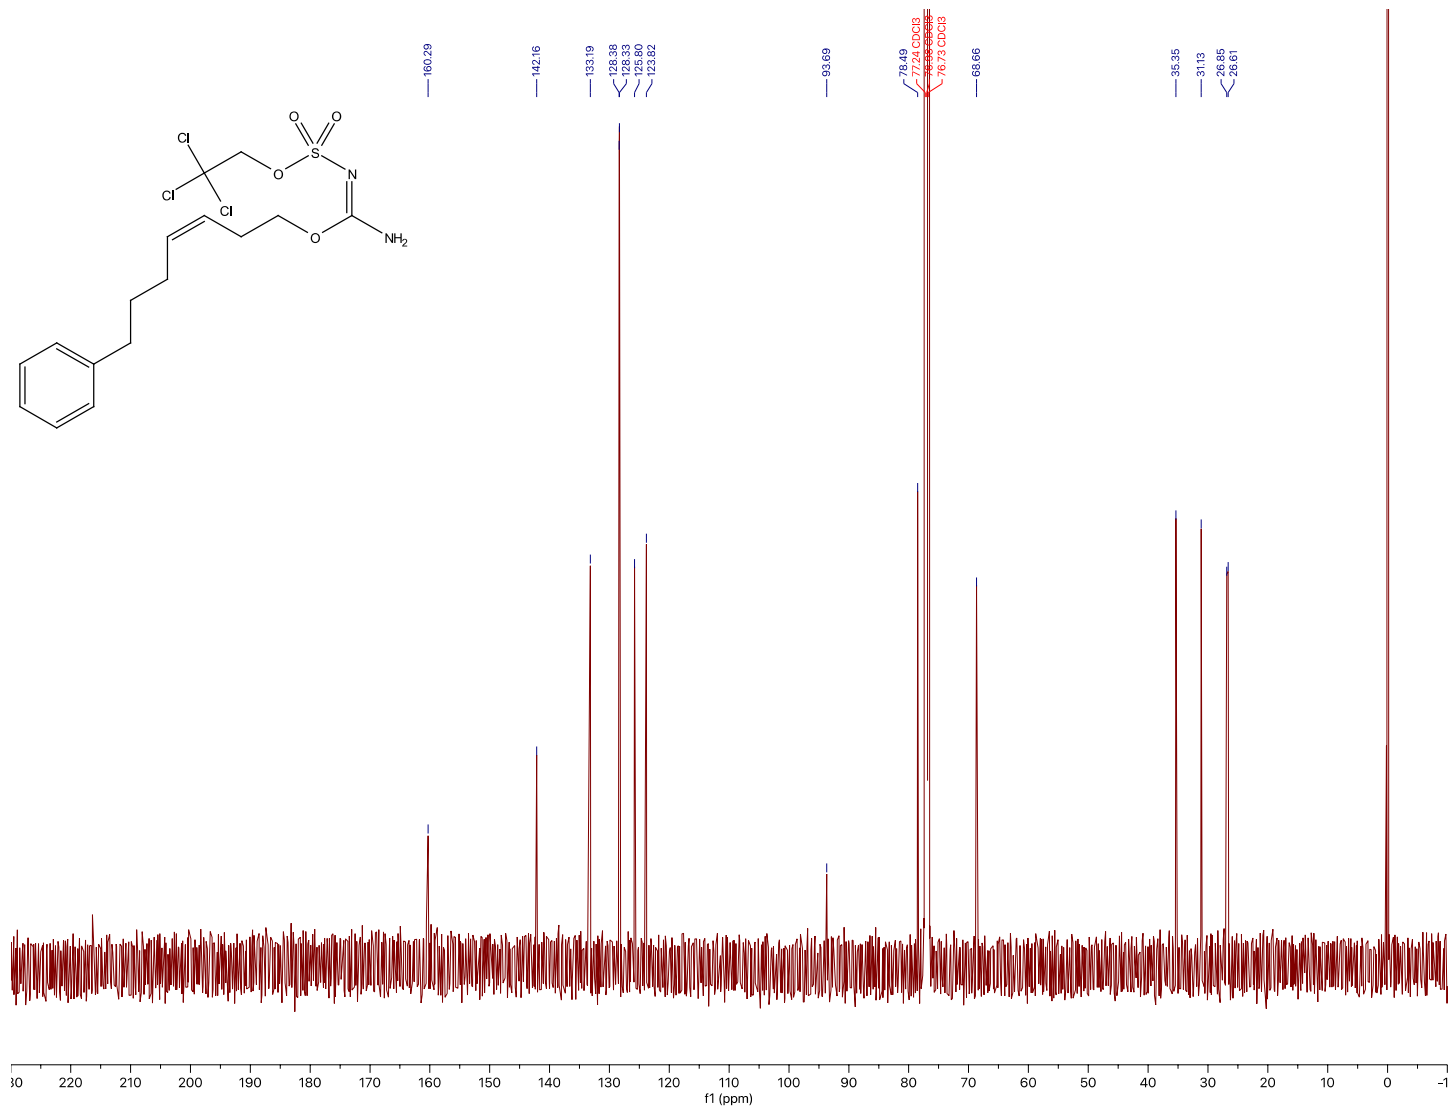

<sup>1</sup>H NMR (500 MHz, CDCl<sub>3</sub>) for Compound 1e

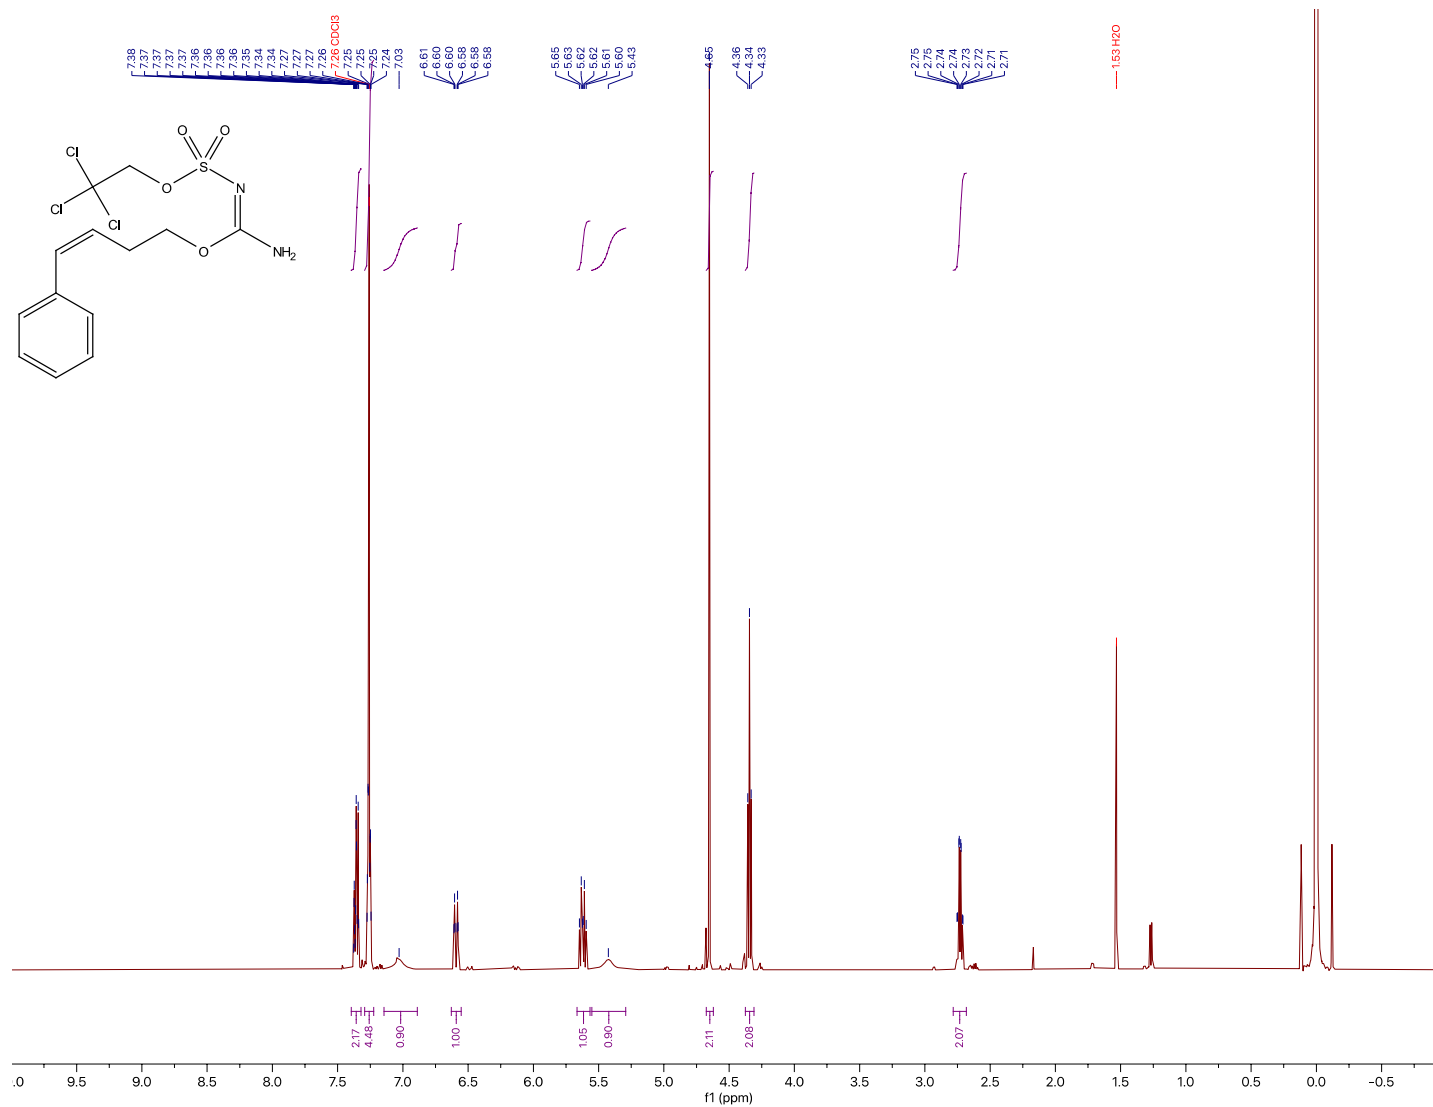

$^{13}\text{C}$  NMR (126 MHz,  $\text{CDCl}_3$ ) for **Compound 1e**

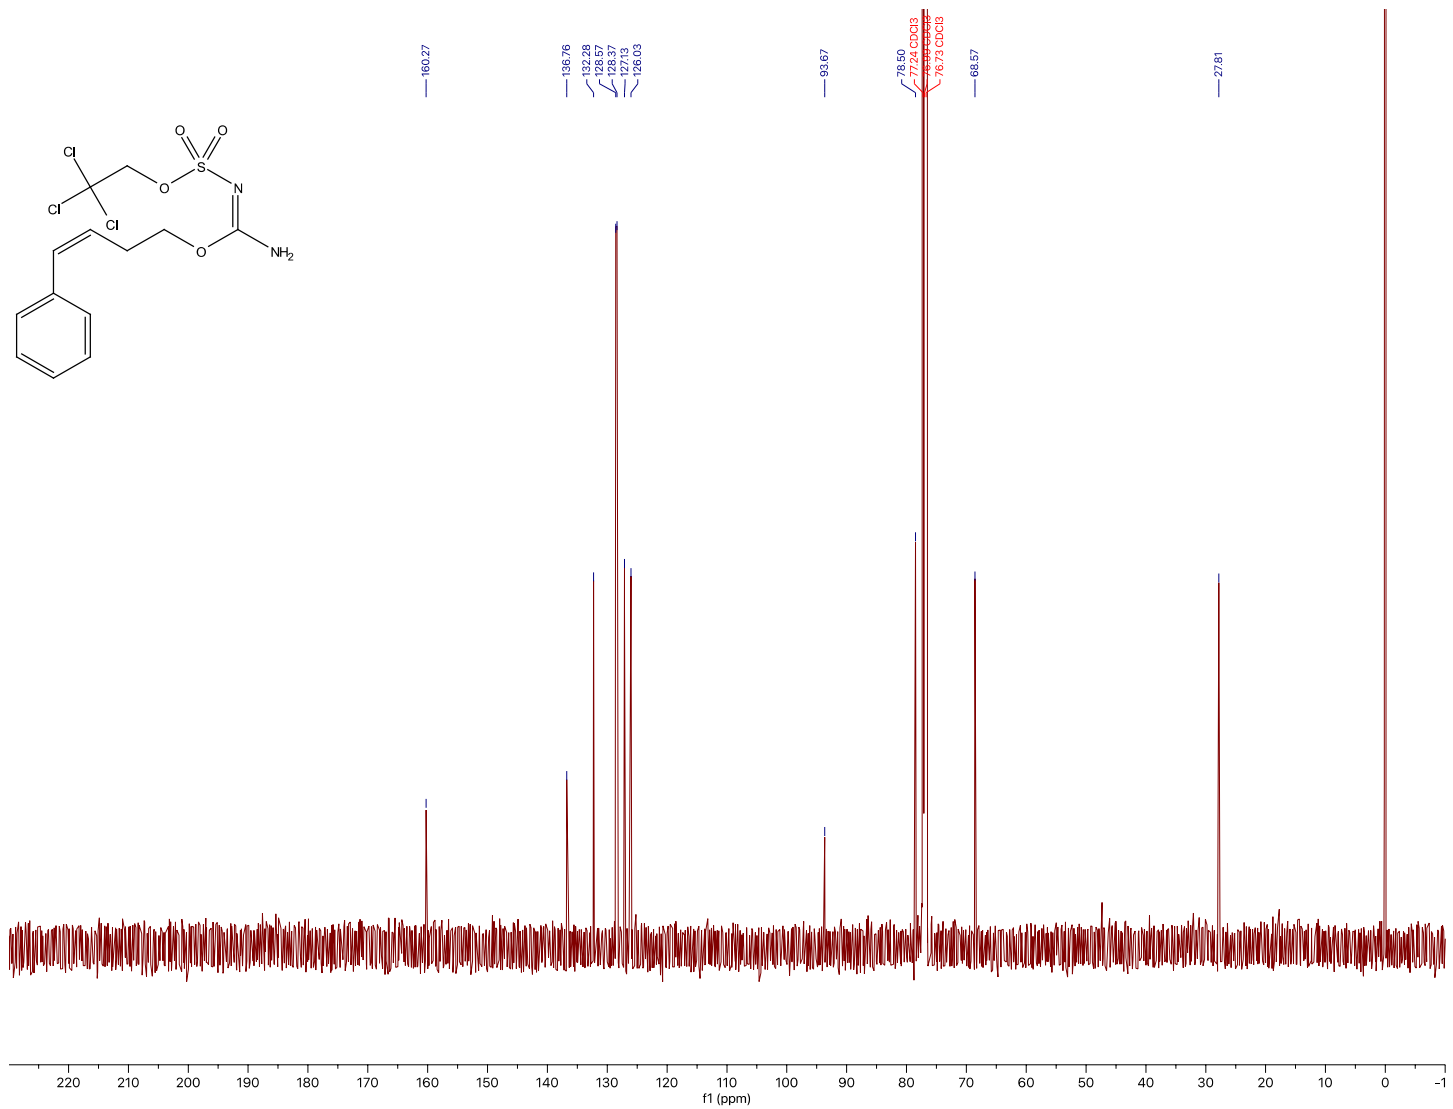

<sup>1</sup>H NMR (500 MHz, CDCl<sub>3</sub>) for Compound 1f

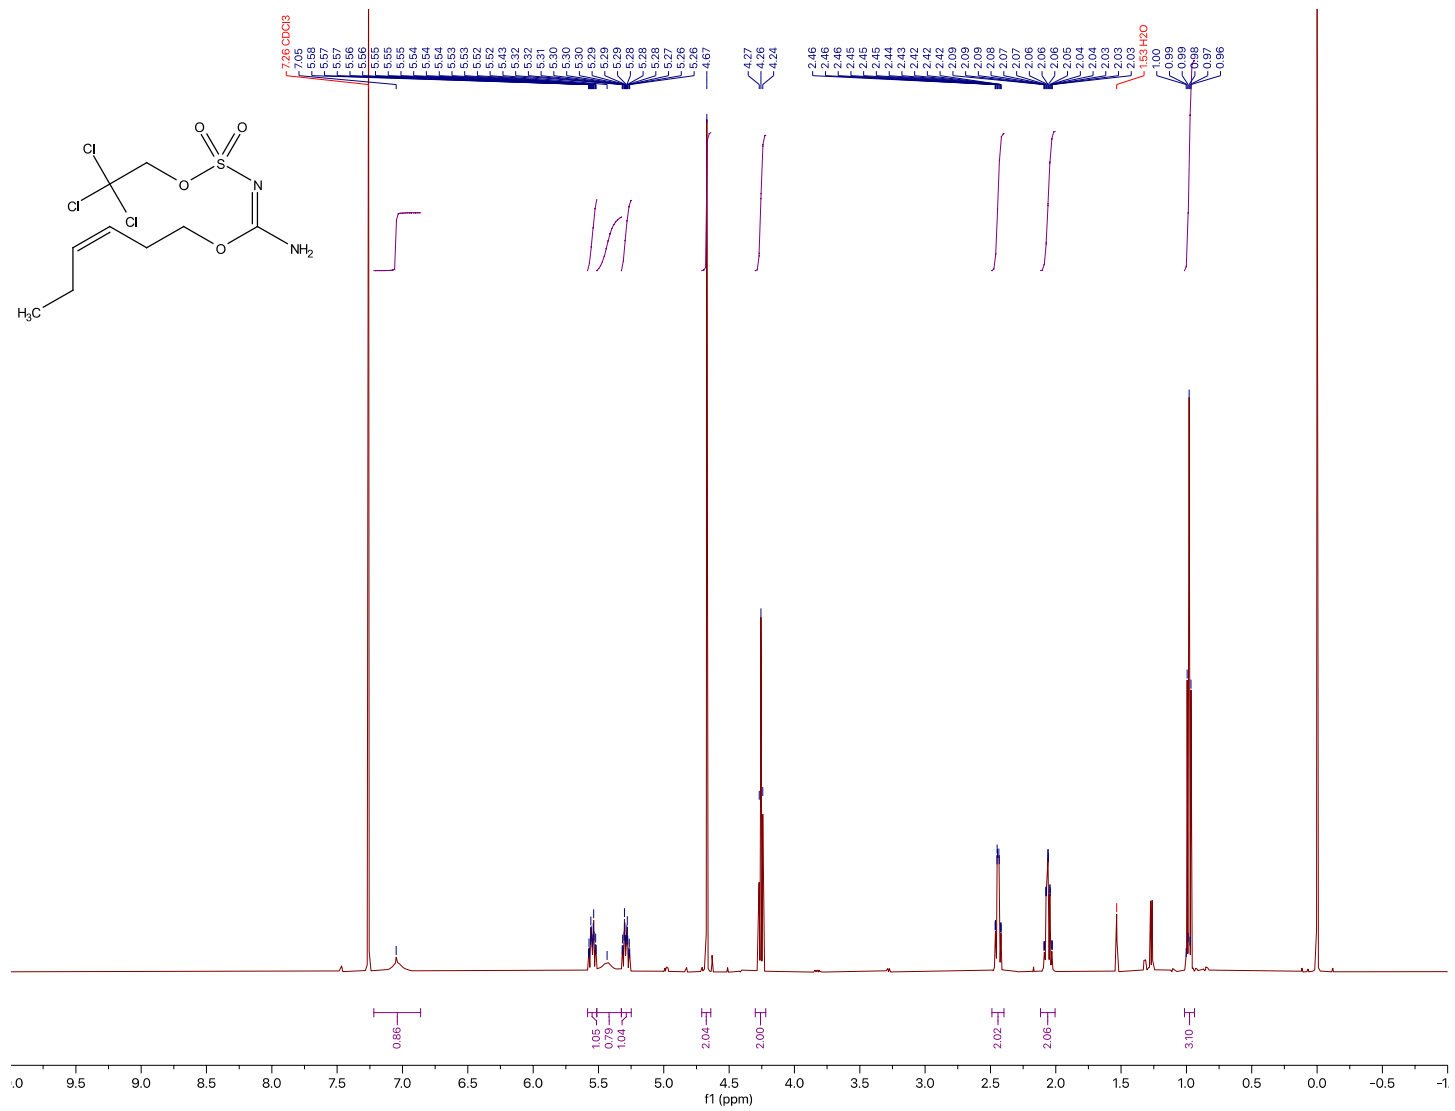

$^{13}\text{C}$  NMR (126 MHz,  $\text{CDCl}_3$ ) for **Compound 1f**

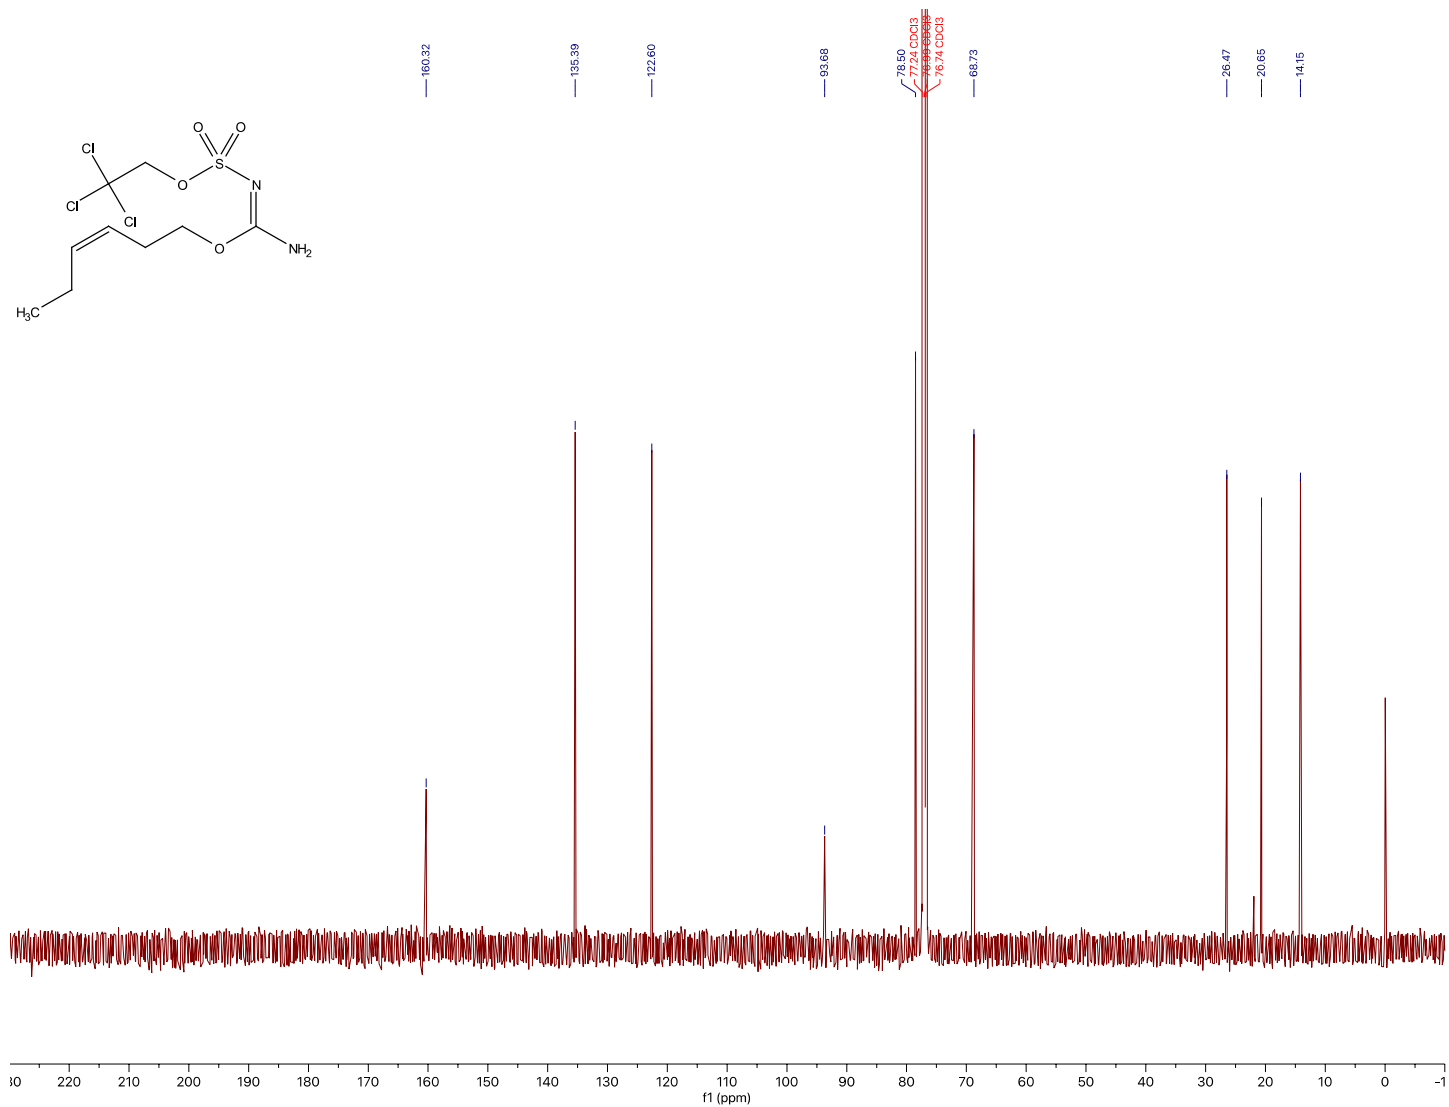

<sup>1</sup>H NMR (500 MHz, CDCl<sub>3</sub>) for **Compound 1g**

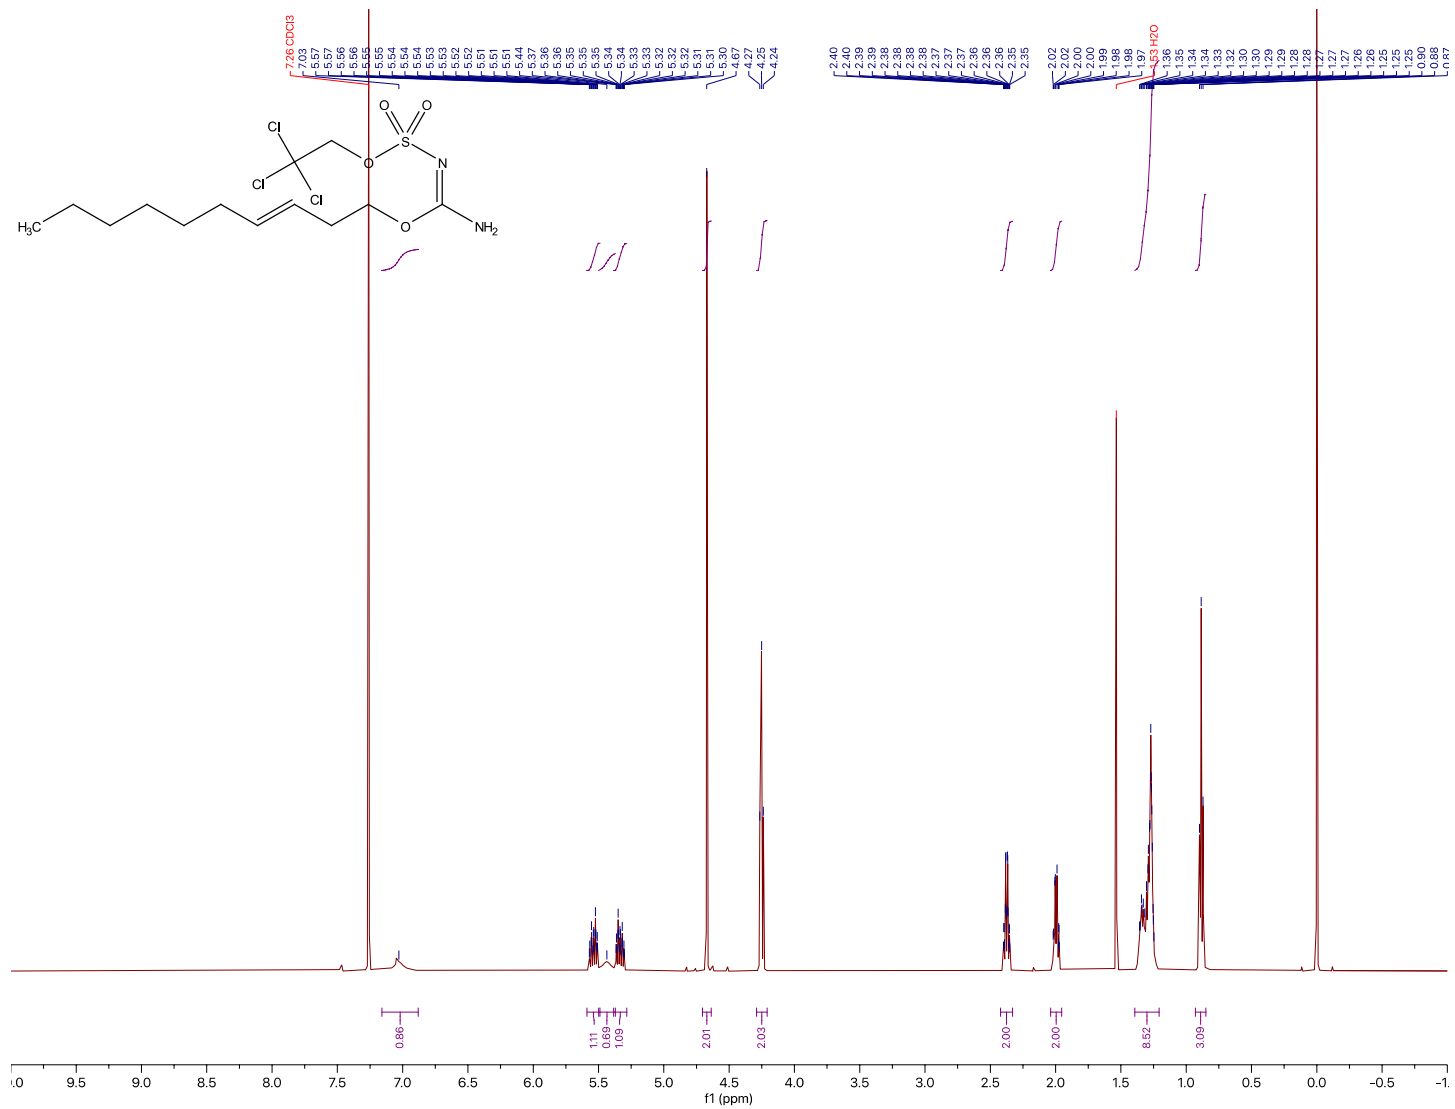

$^{13}\text{C}$  NMR (126 MHz,  $\text{CDCl}_3$ ) for **Compound 1g**

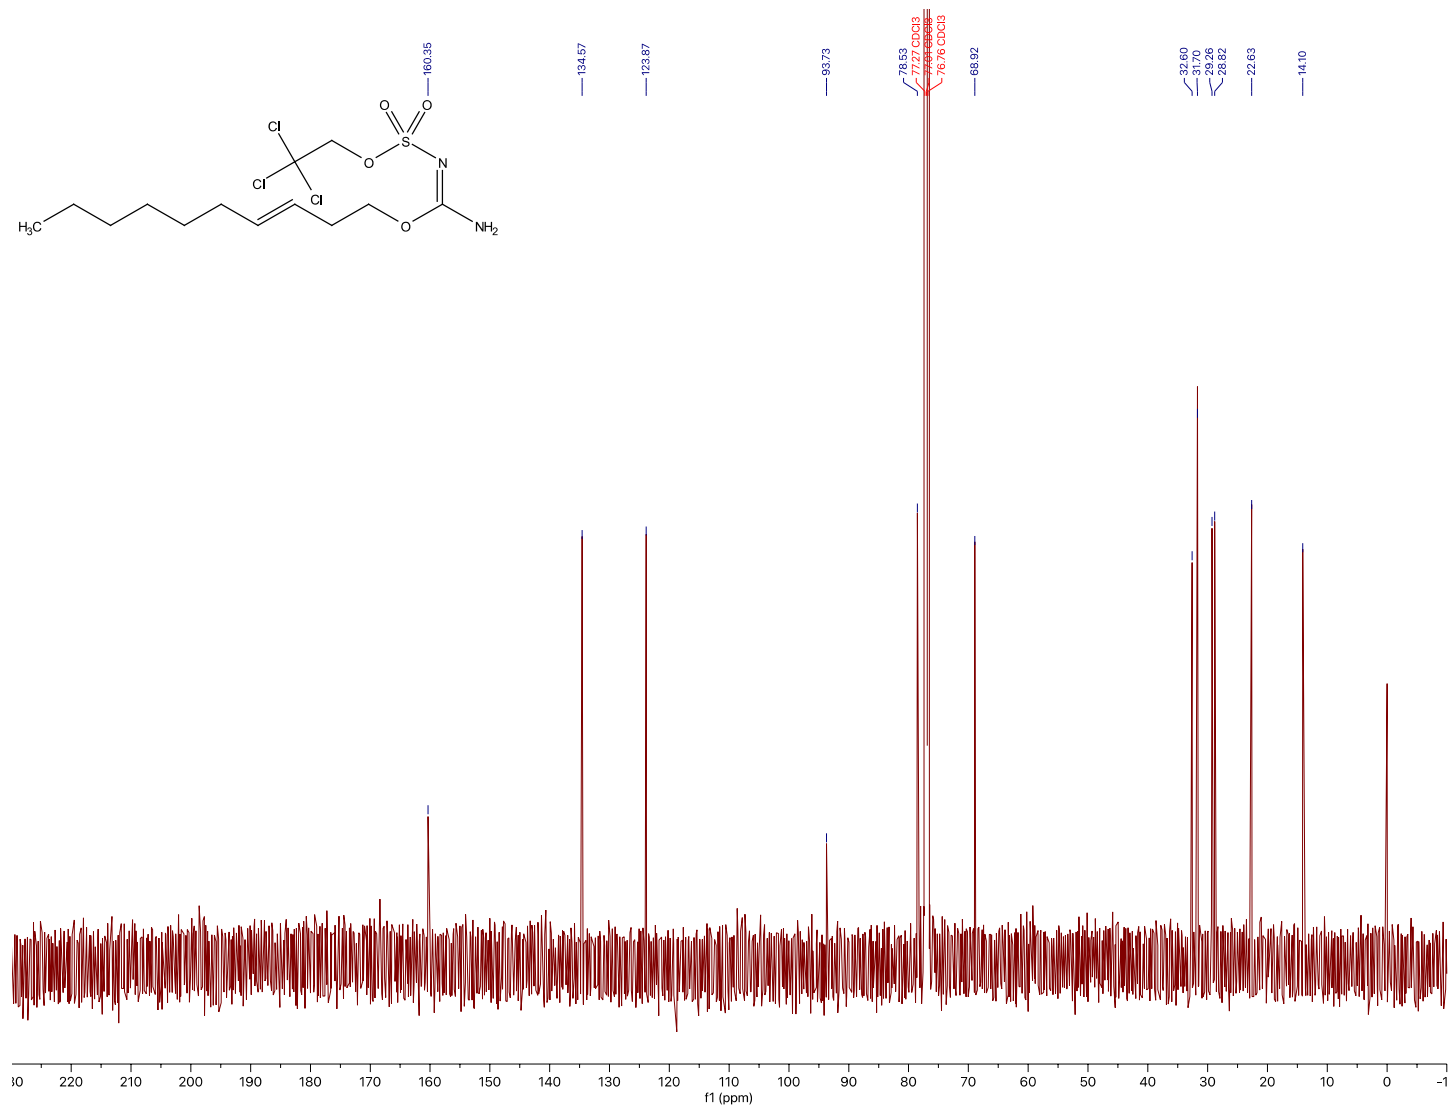

<sup>1</sup>H NMR (500 MHz, CDCl<sub>3</sub>) for Compound 1h

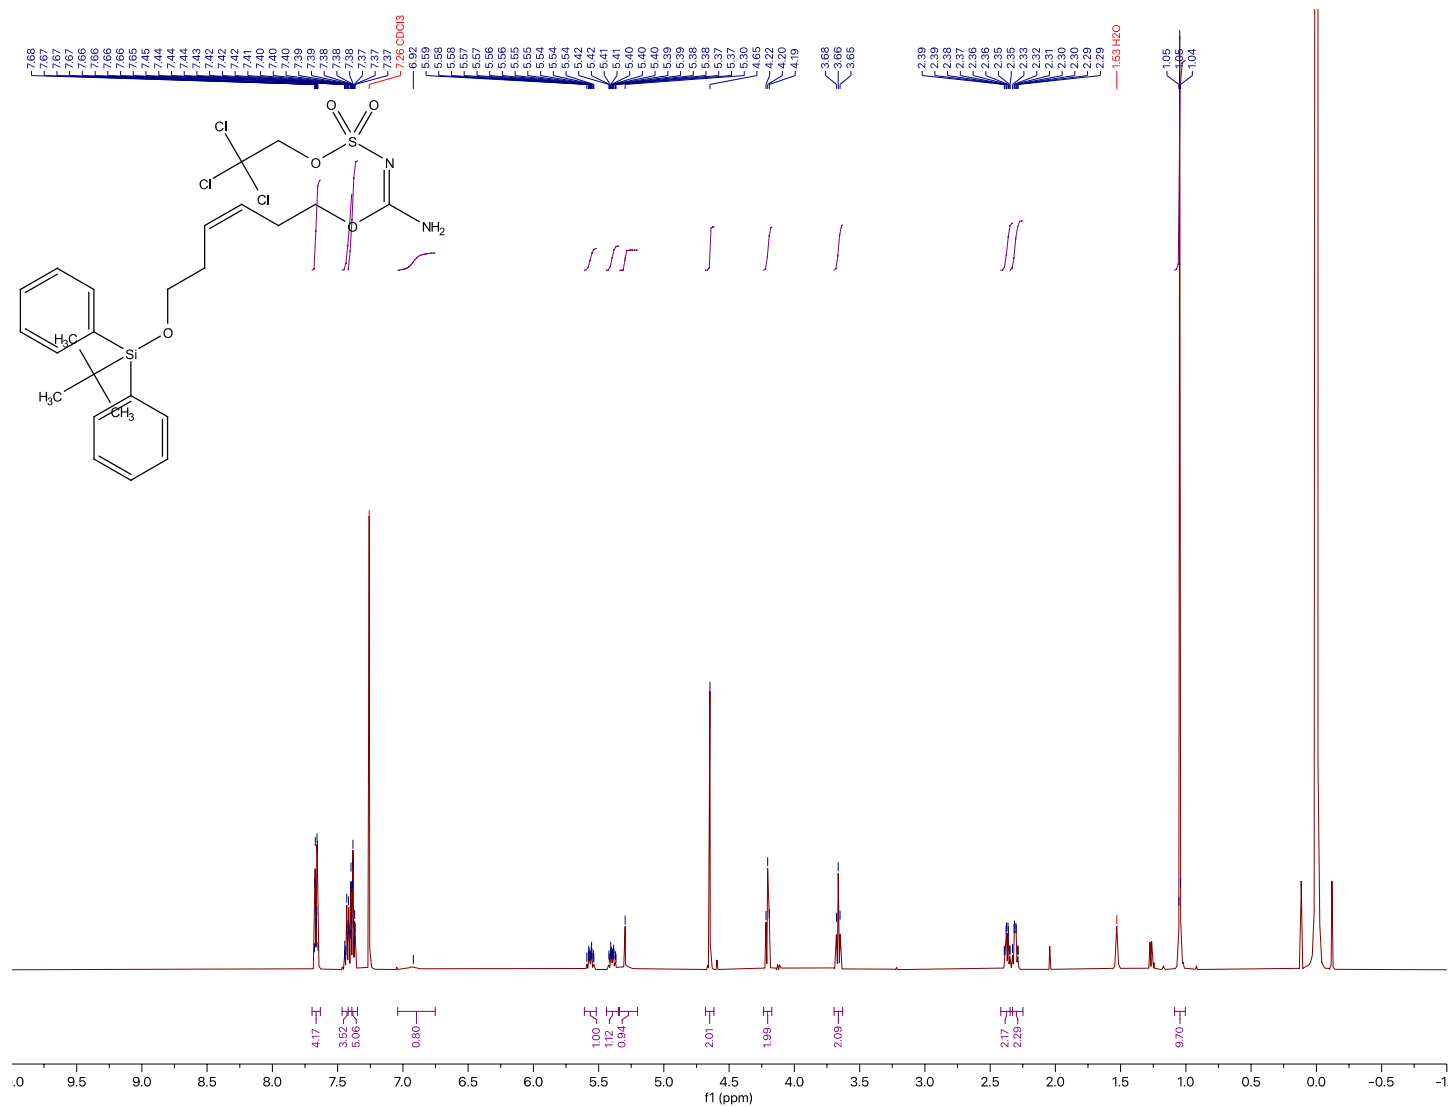



$^{13}\text{C}$  NMR (126 MHz,  $\text{CDCl}_3$ ) for **Compound 1h**

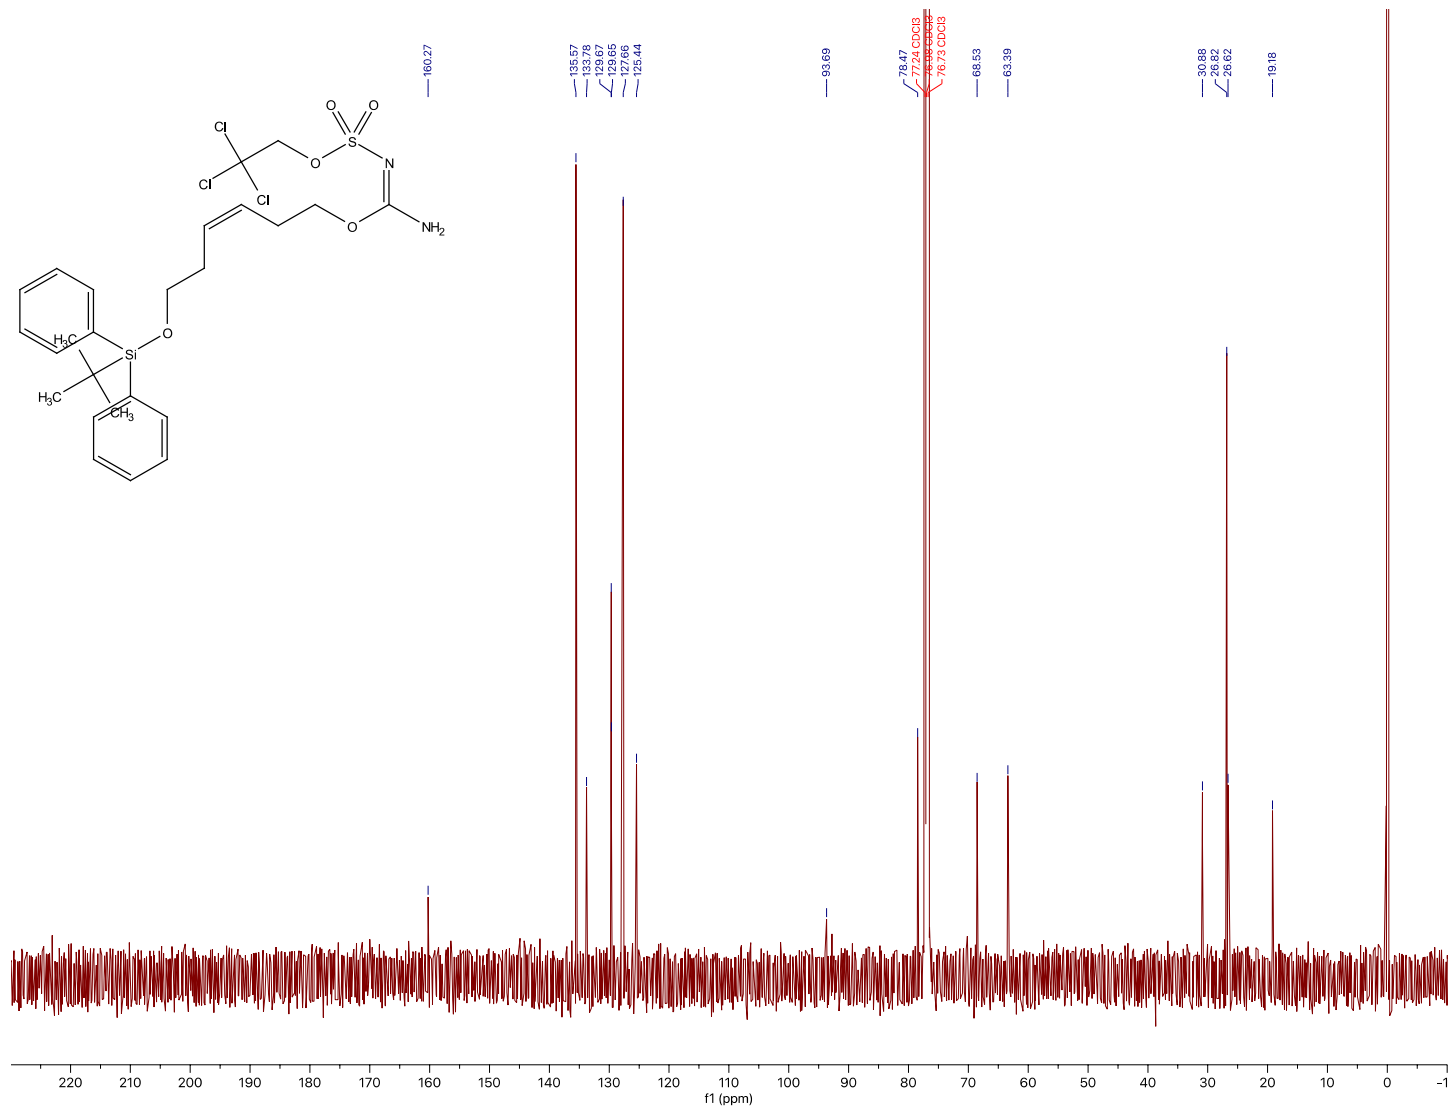

<sup>1</sup>H NMR (500 MHz, CDCl<sub>3</sub>) for **Compound 1i**

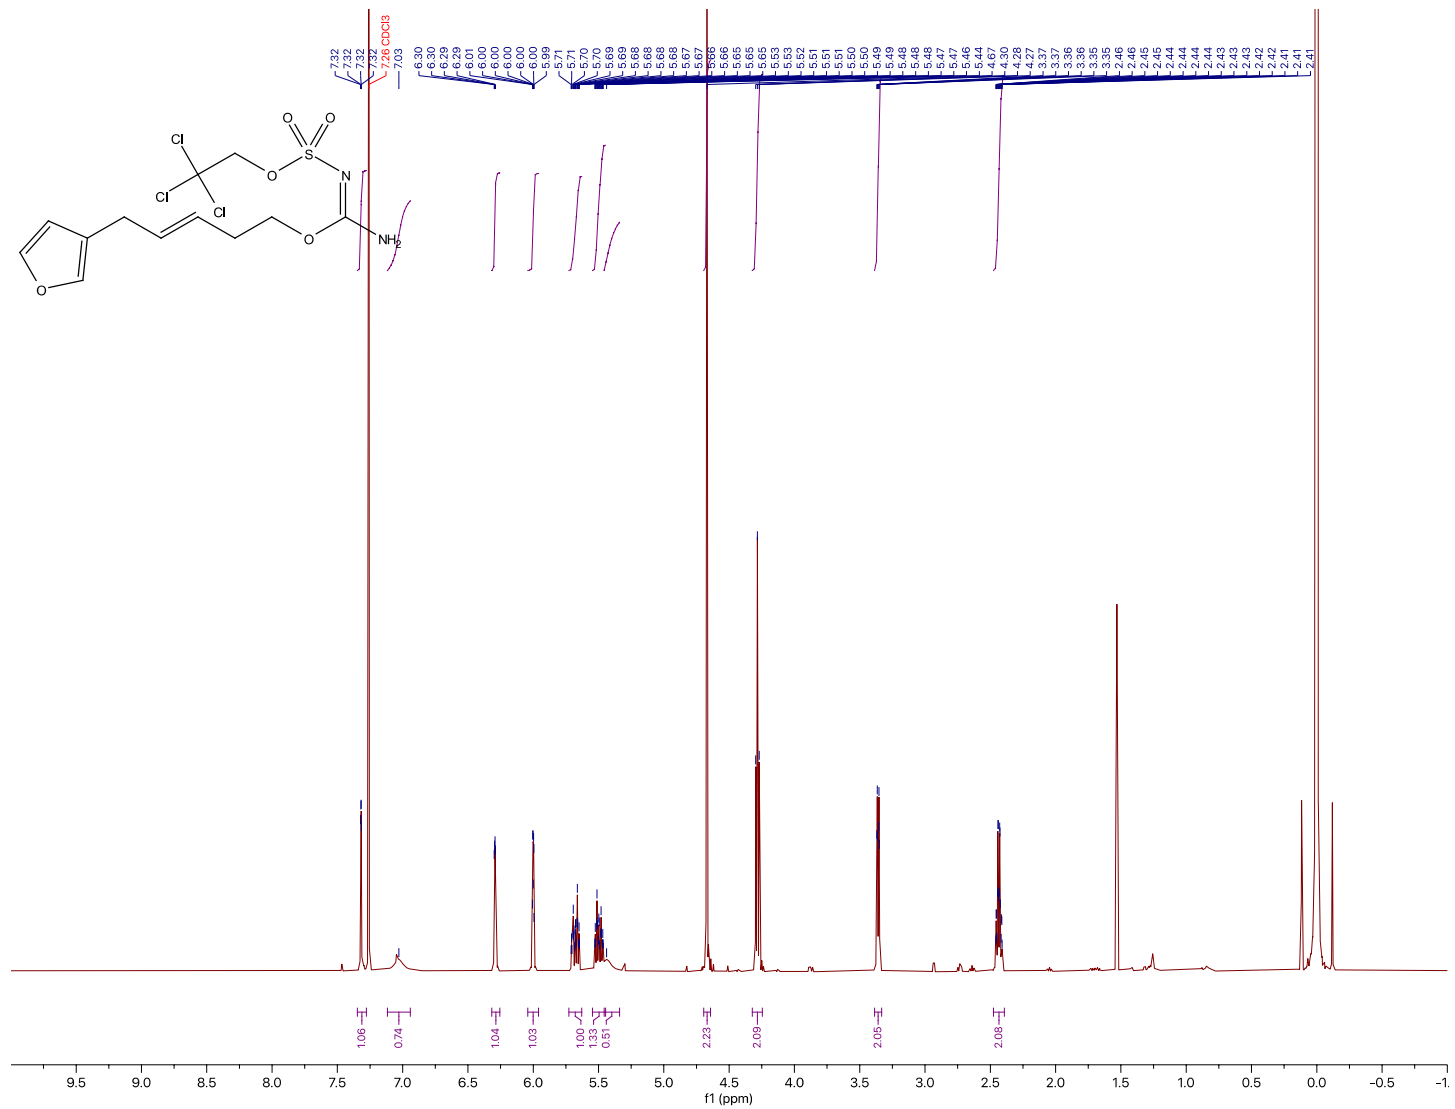

$^{13}\text{C}$  NMR (126 MHz,  $\text{CDCl}_3$ ) for **Compound 1i**

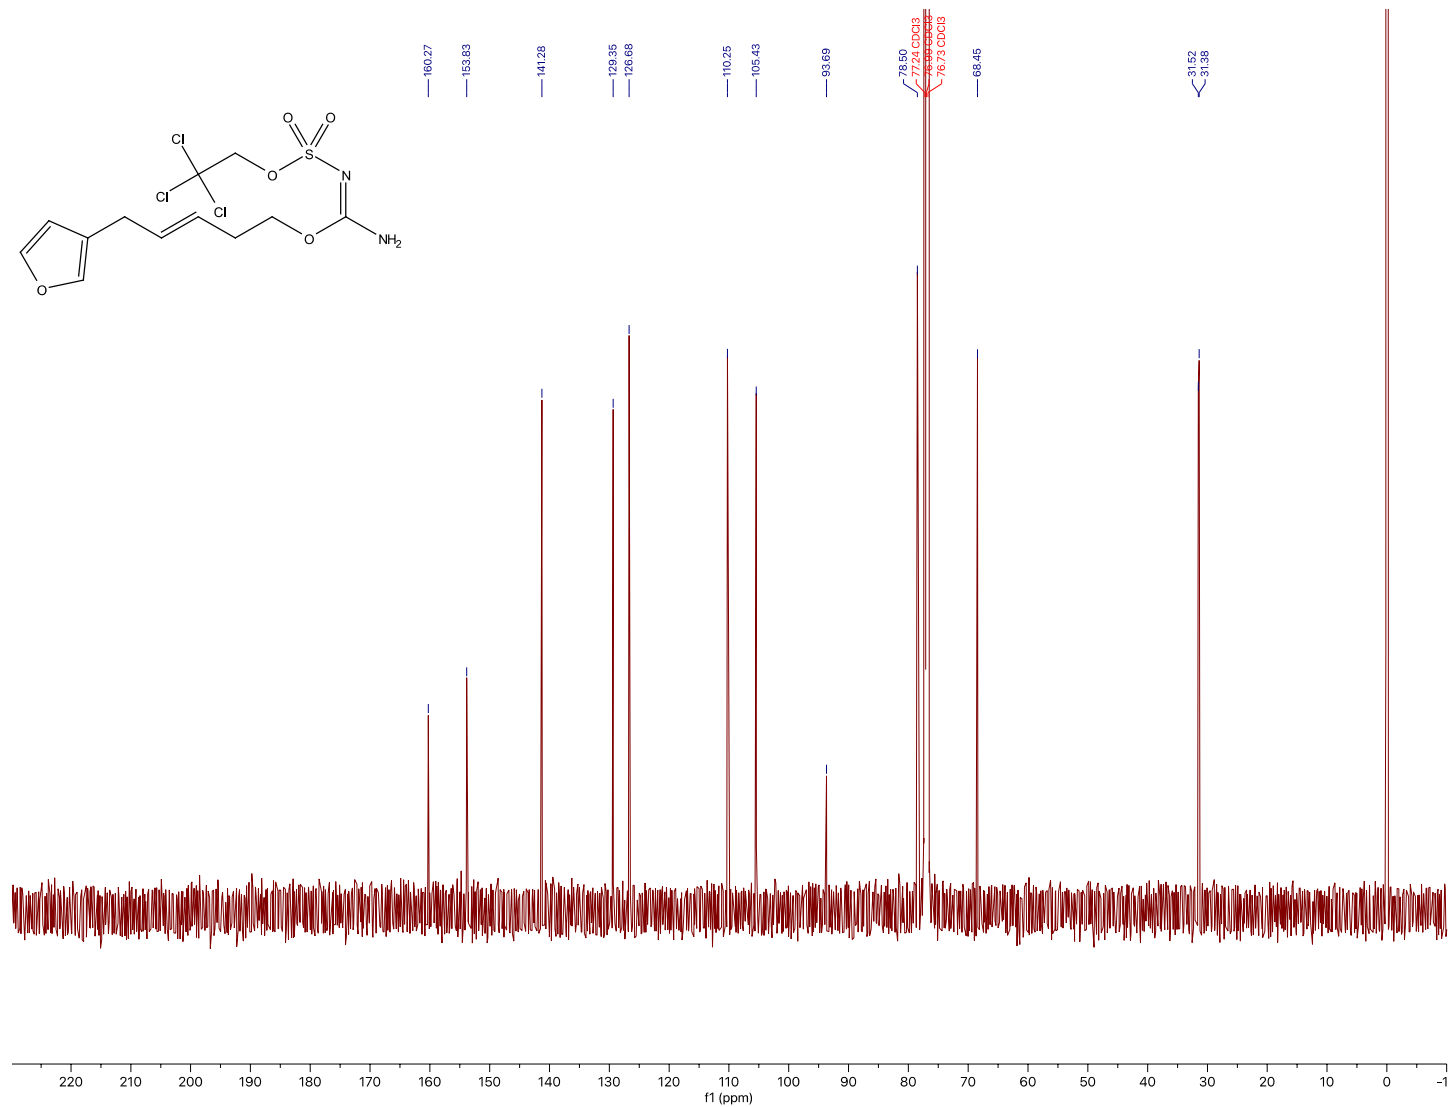

<sup>1</sup>H NMR (500 MHz, CDCl<sub>3</sub>) for Compound 1j

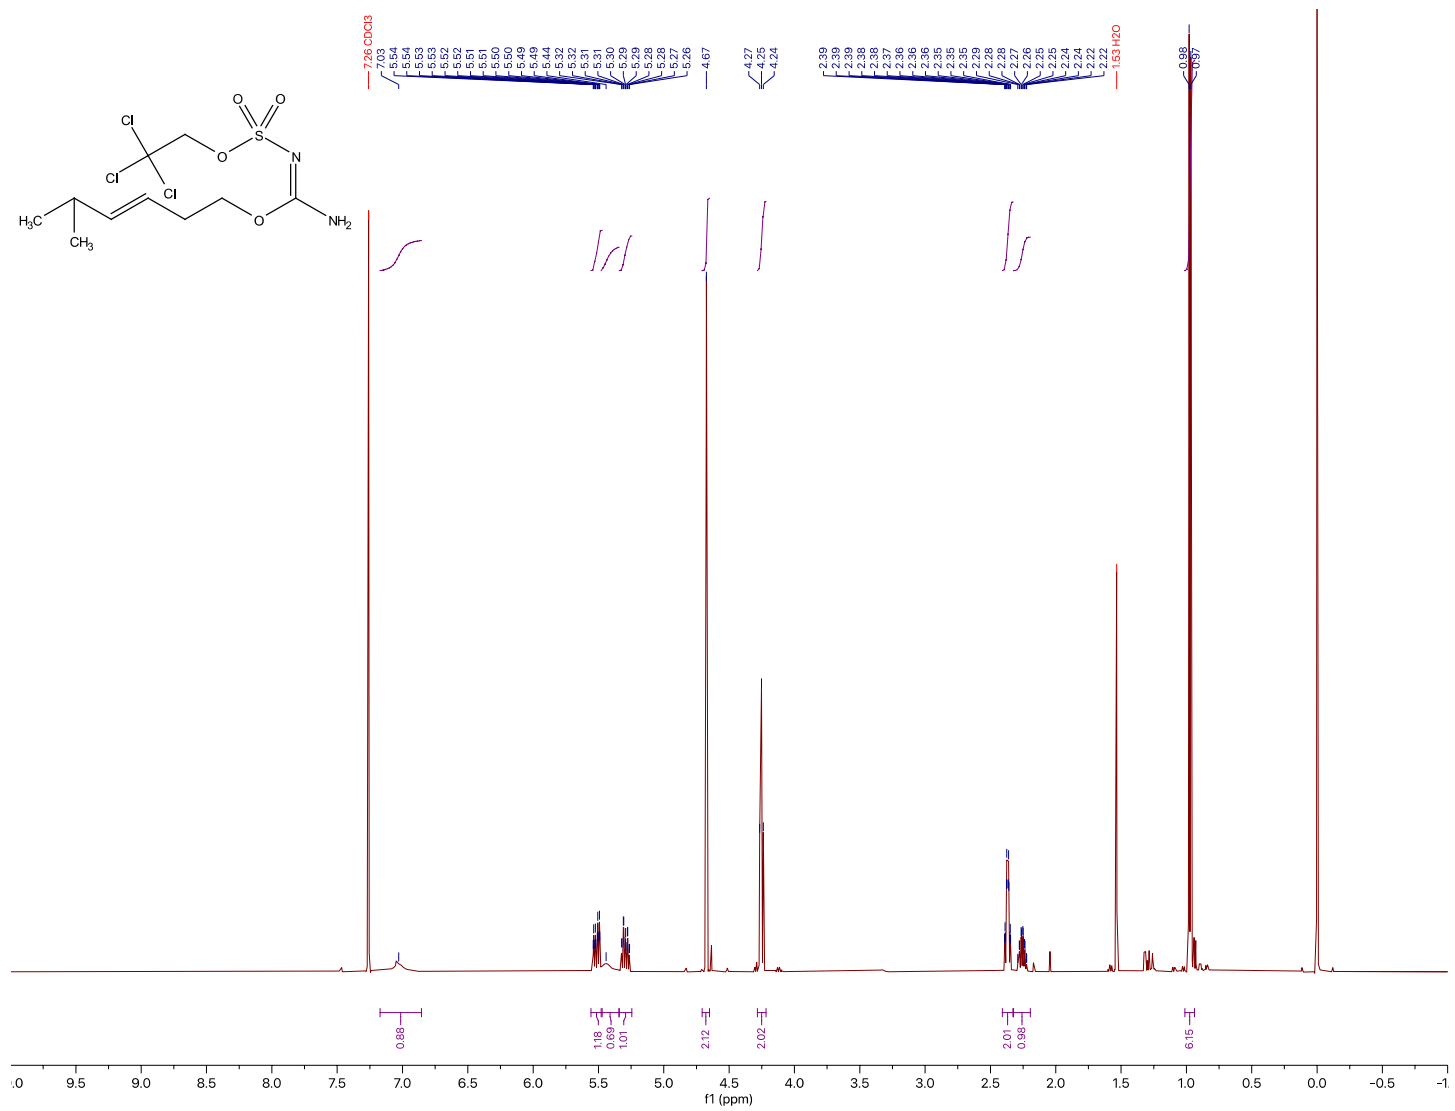

$^{13}\text{C}$  NMR (126 MHz,  $\text{CDCl}_3$ ) for **Compound 1j**

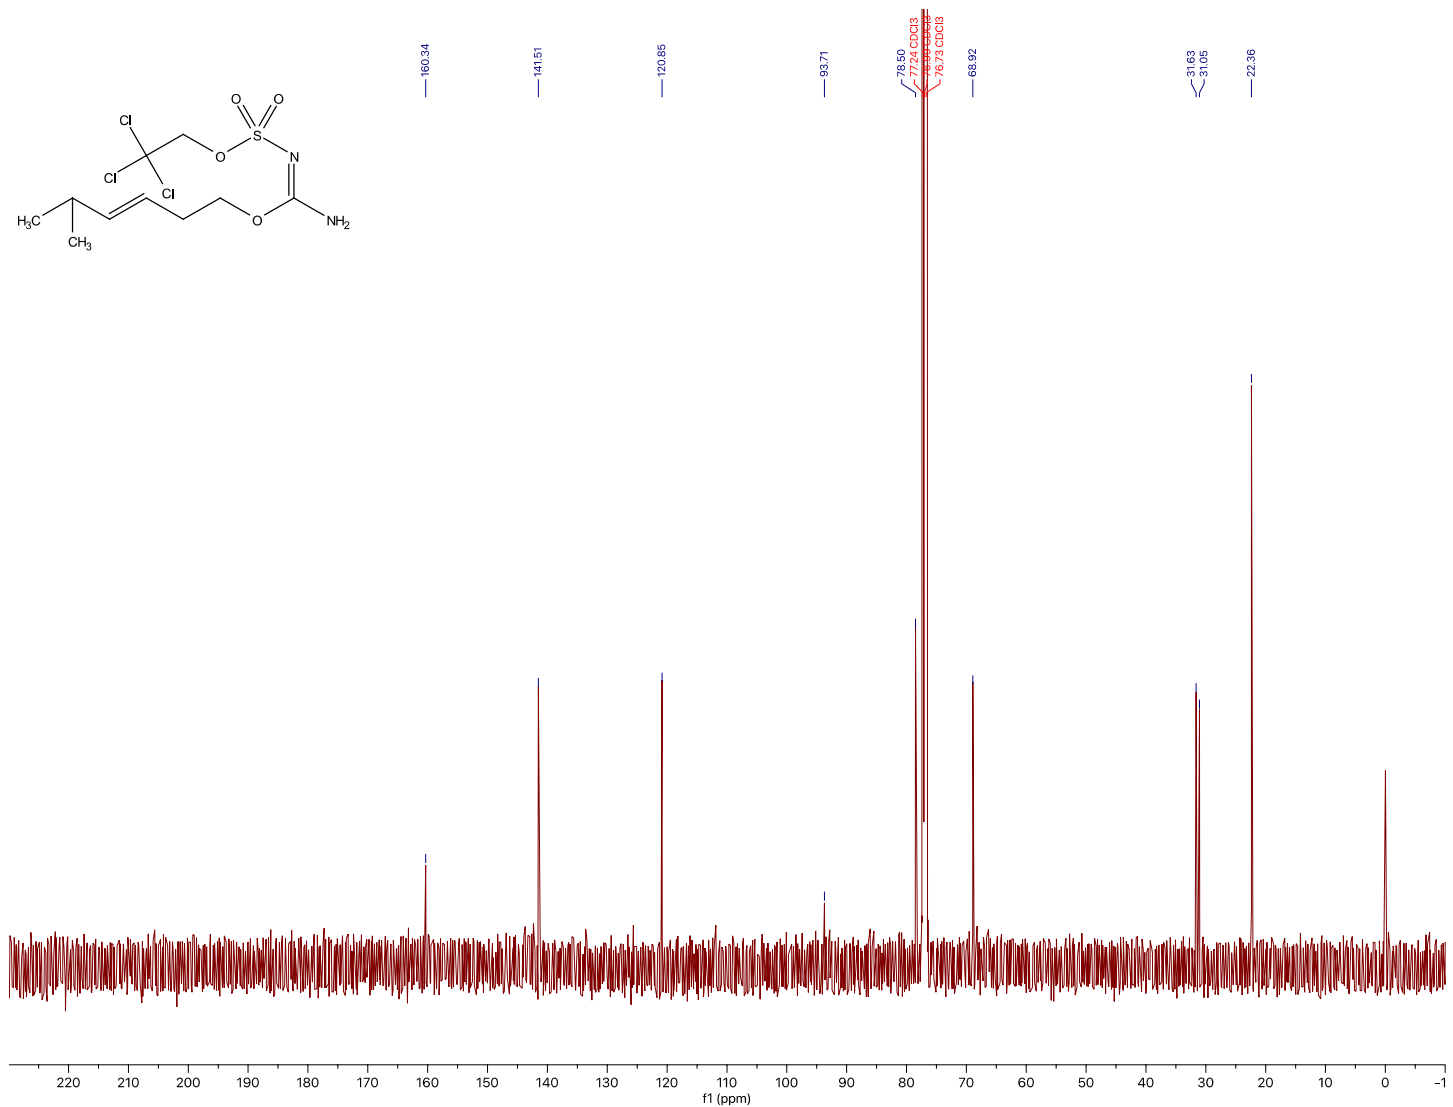

<sup>1</sup>H NMR (500 MHz, CDCl<sub>3</sub>) for Compound 1k

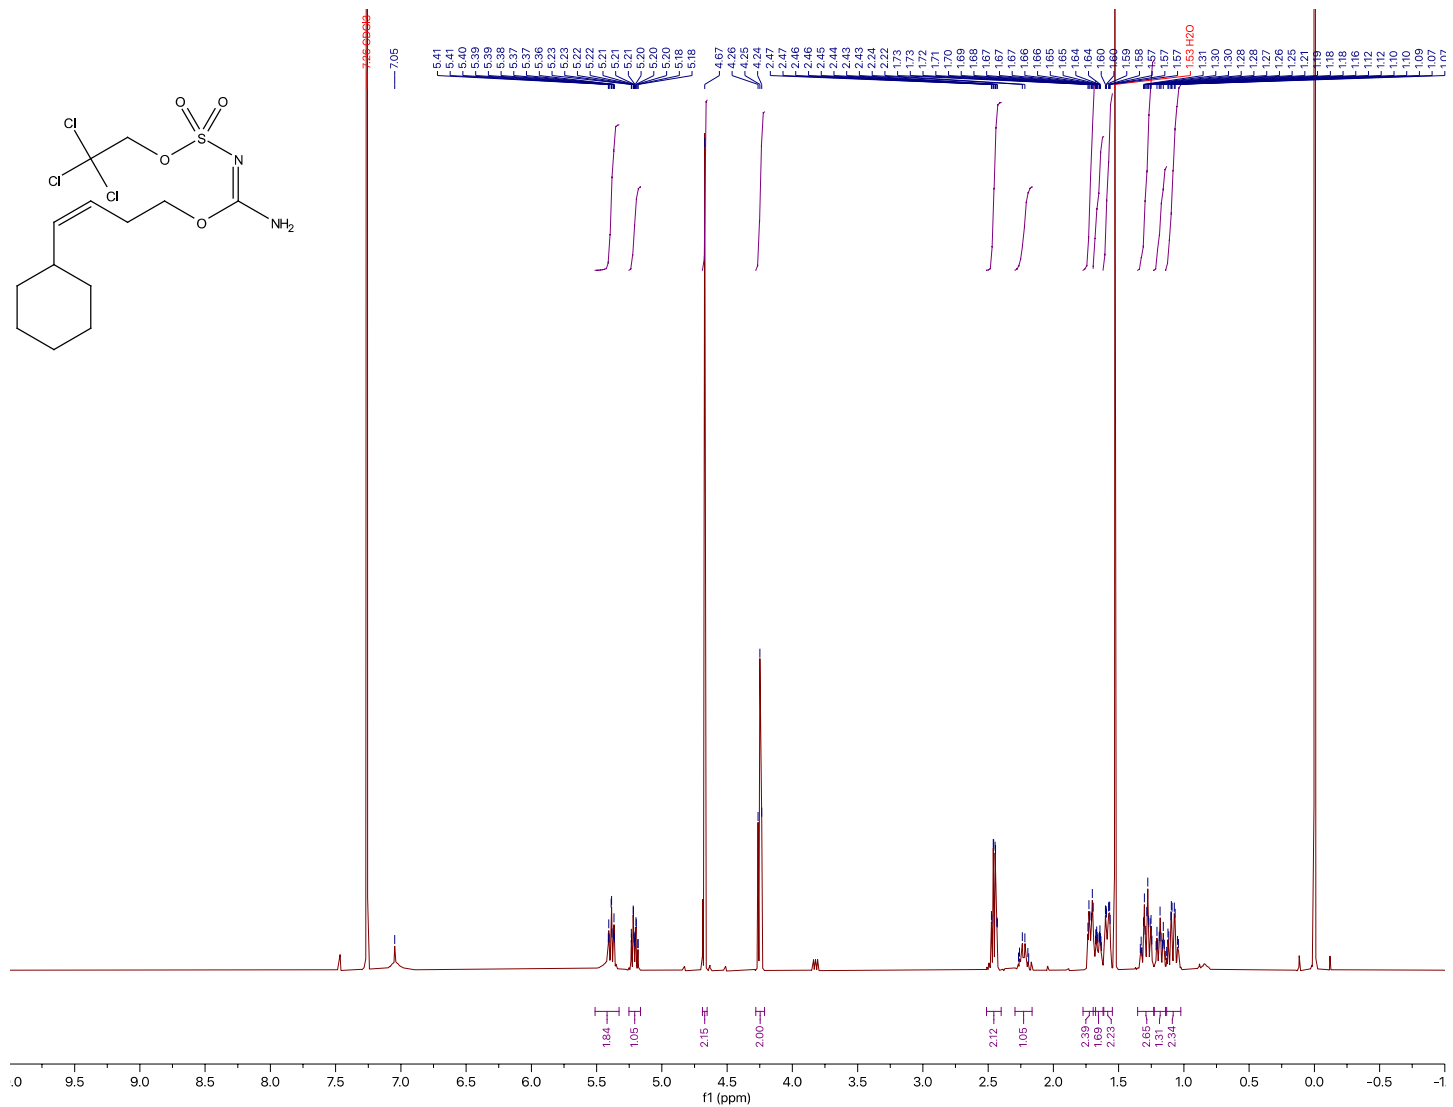

$^{13}\text{C}$  NMR (126 MHz,  $\text{CDCl}_3$ ) for **Compound 1k**

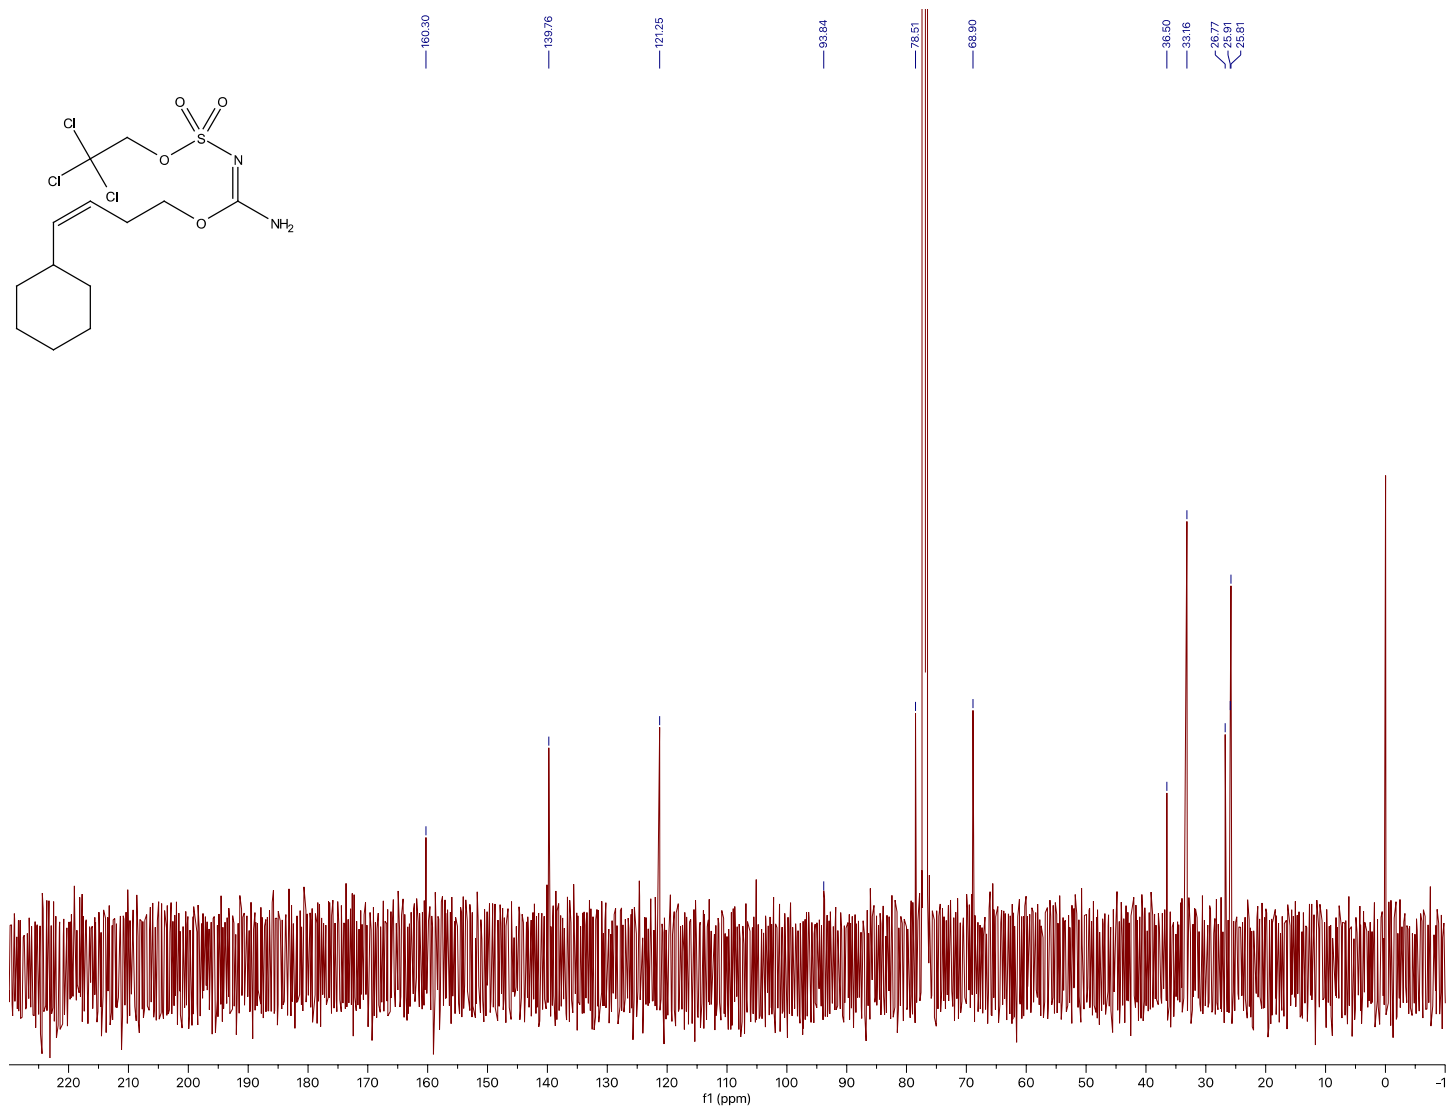

<sup>1</sup>H NMR (500 MHz, CDCl<sub>3</sub>) for **Compound 11**

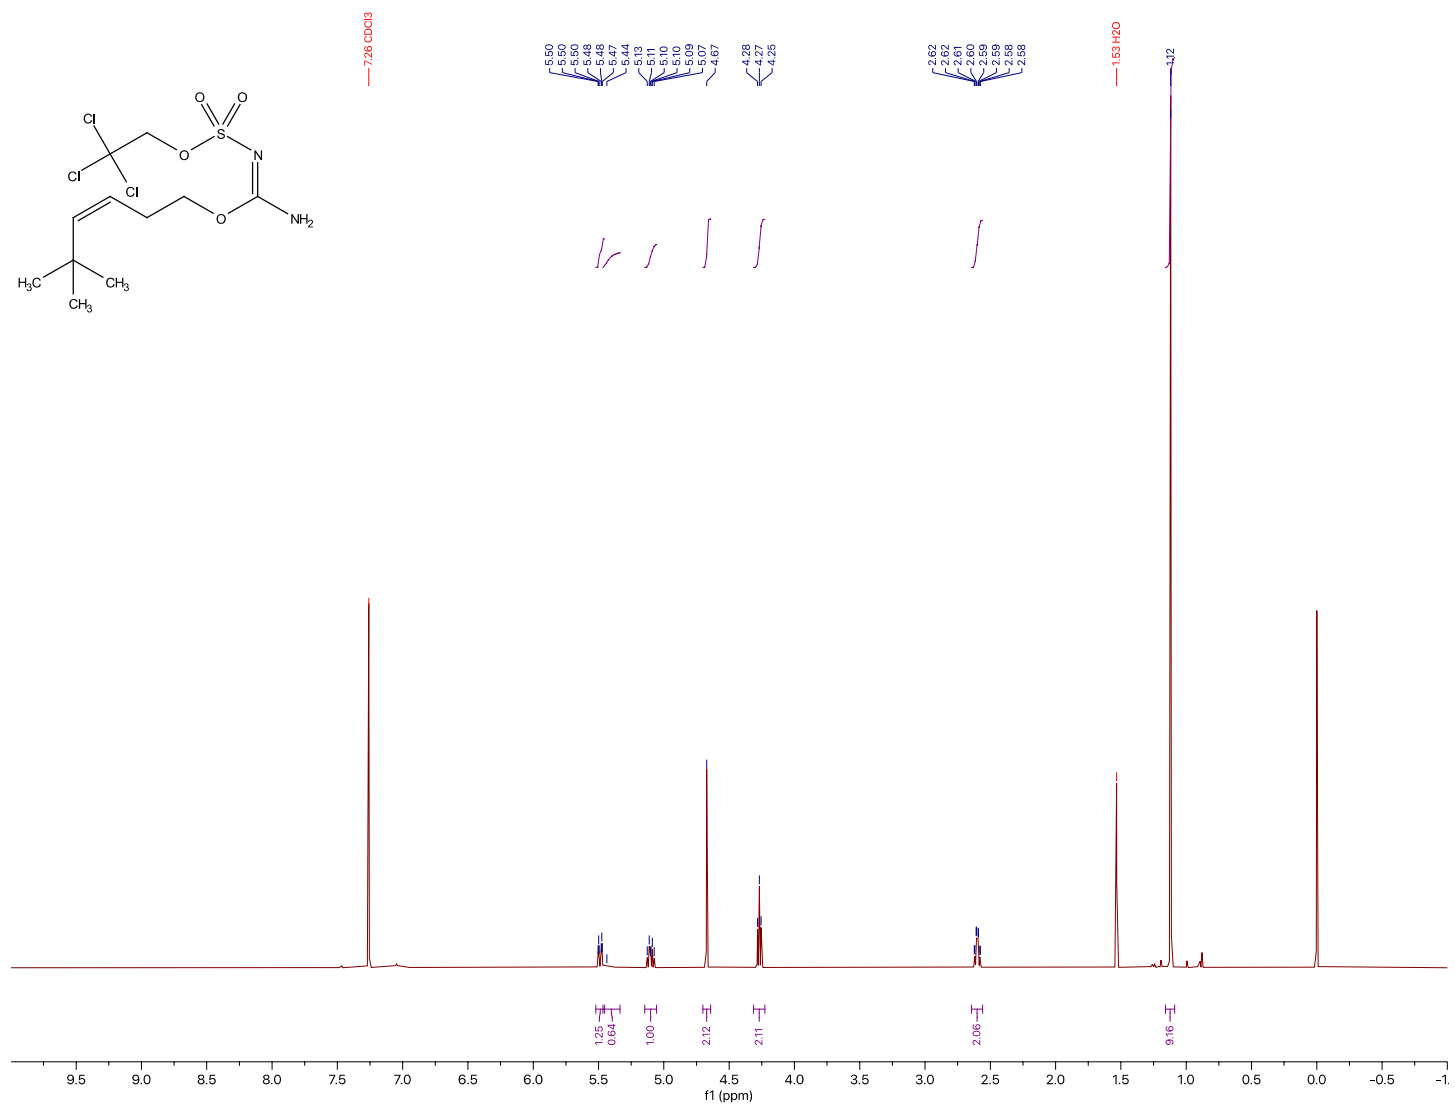



$^{13}\text{C}$  NMR (126 MHz,  $\text{CDCl}_3$ ) for **Compound 11**

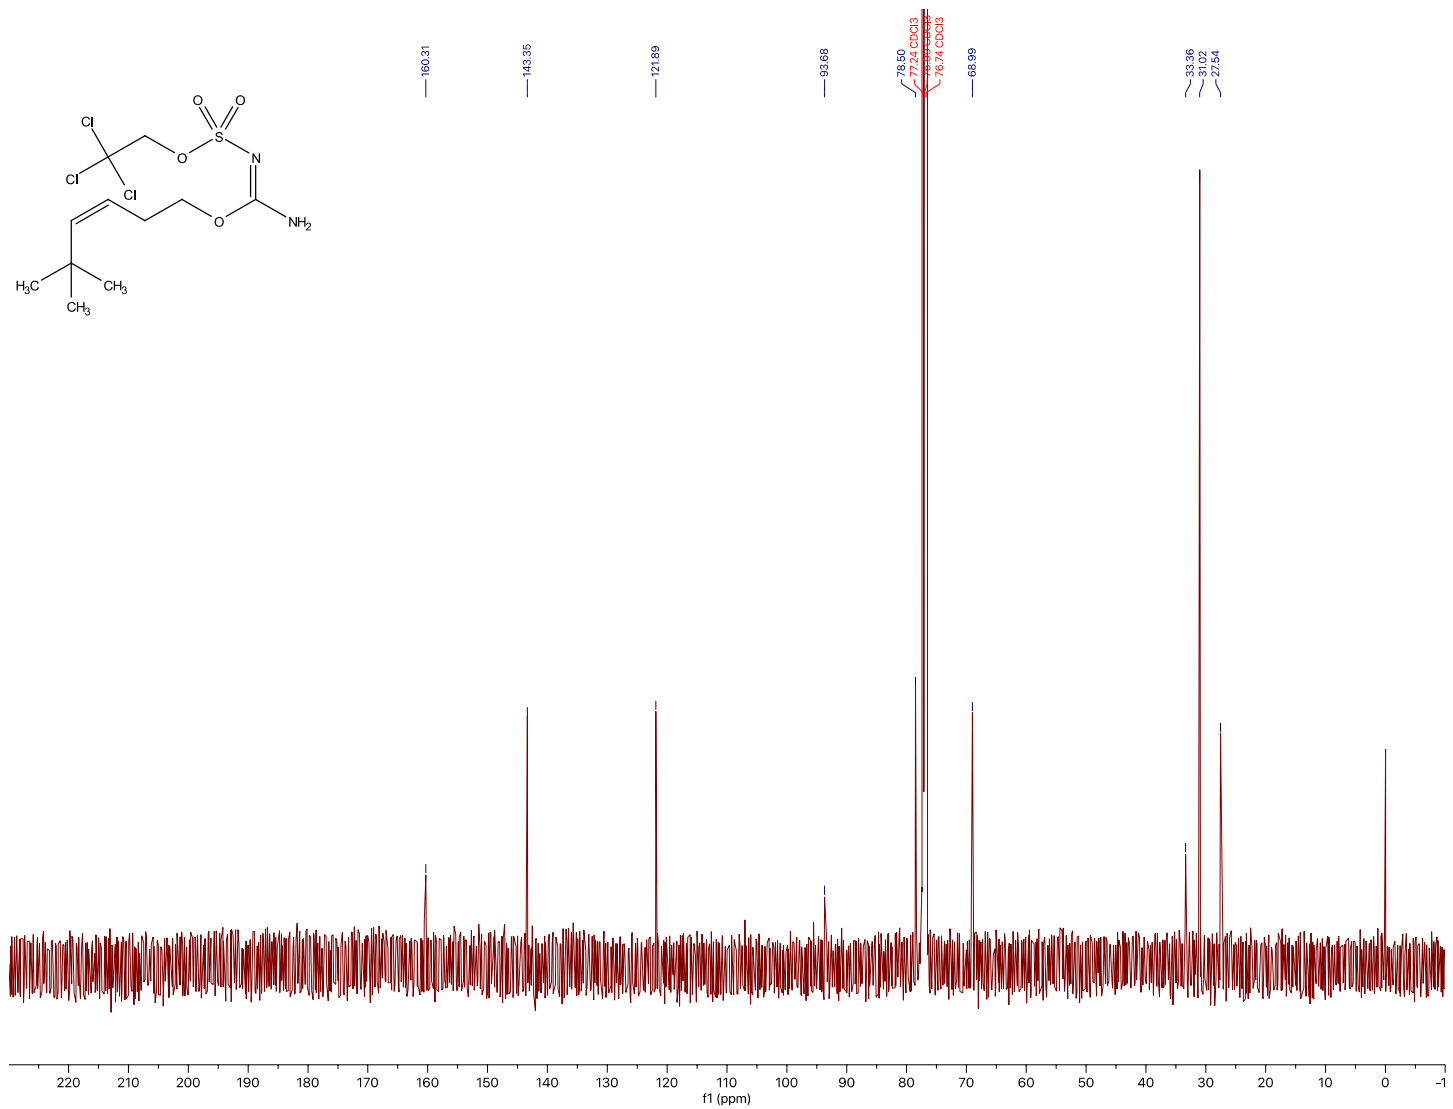

<sup>1</sup>H NMR (500 MHz, CDCl<sub>3</sub>) for **Compound 1m**

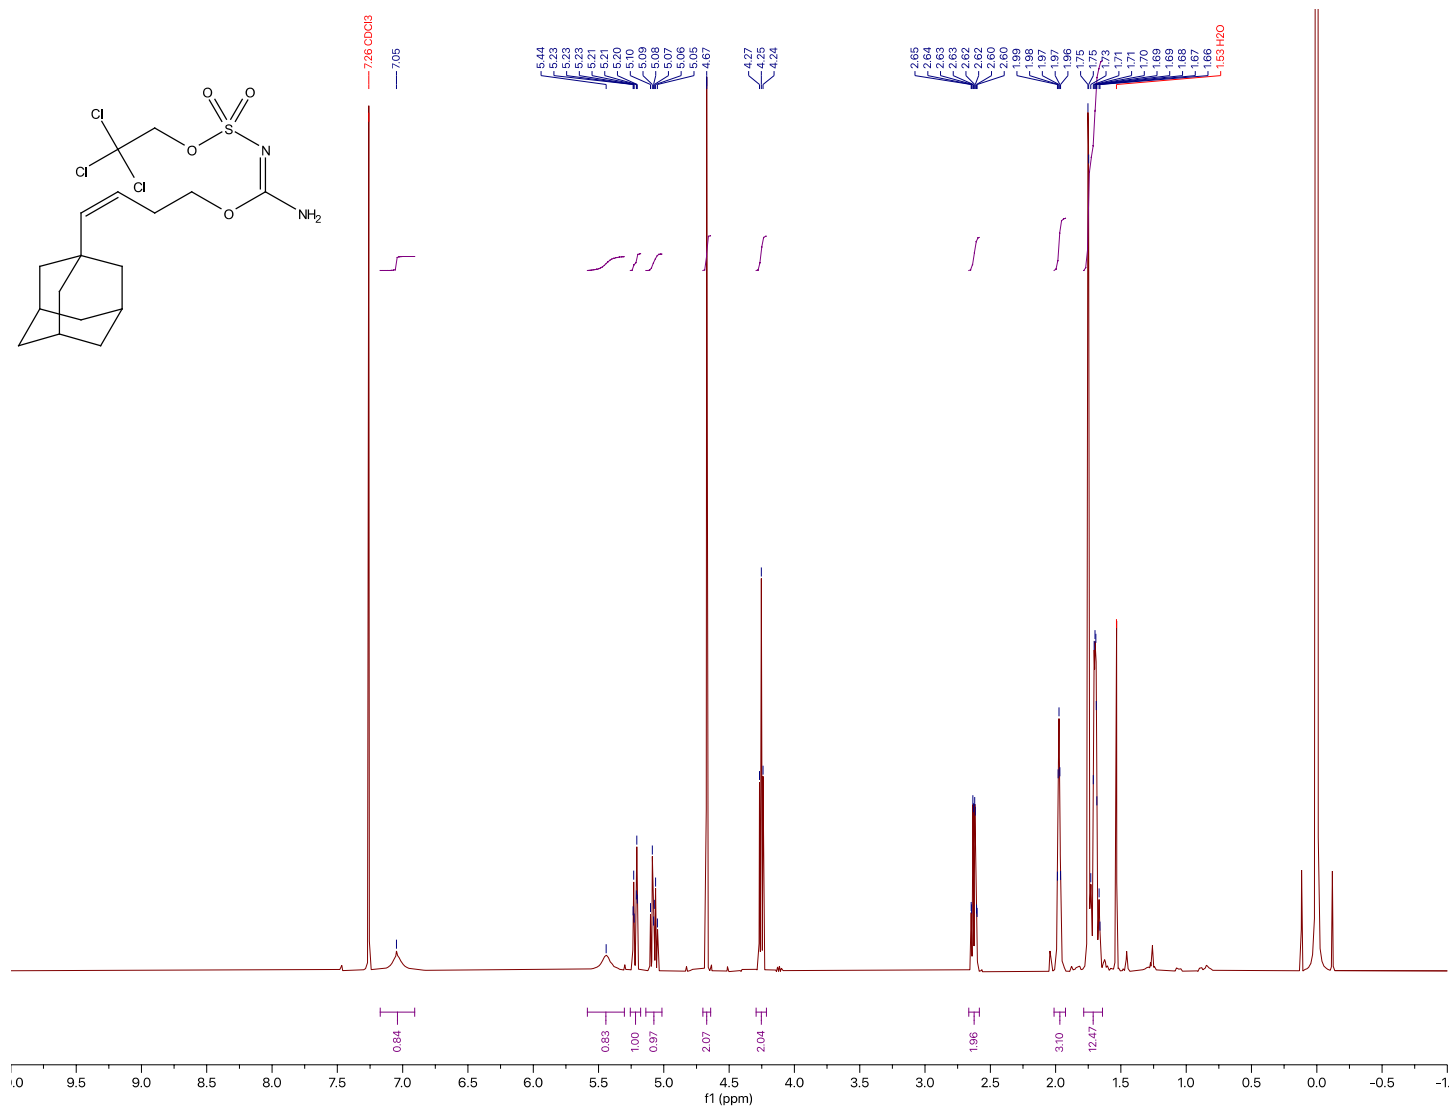

$^{13}\text{C}$  NMR (126 MHz,  $\text{CDCl}_3$ ) for **Compound 1m**

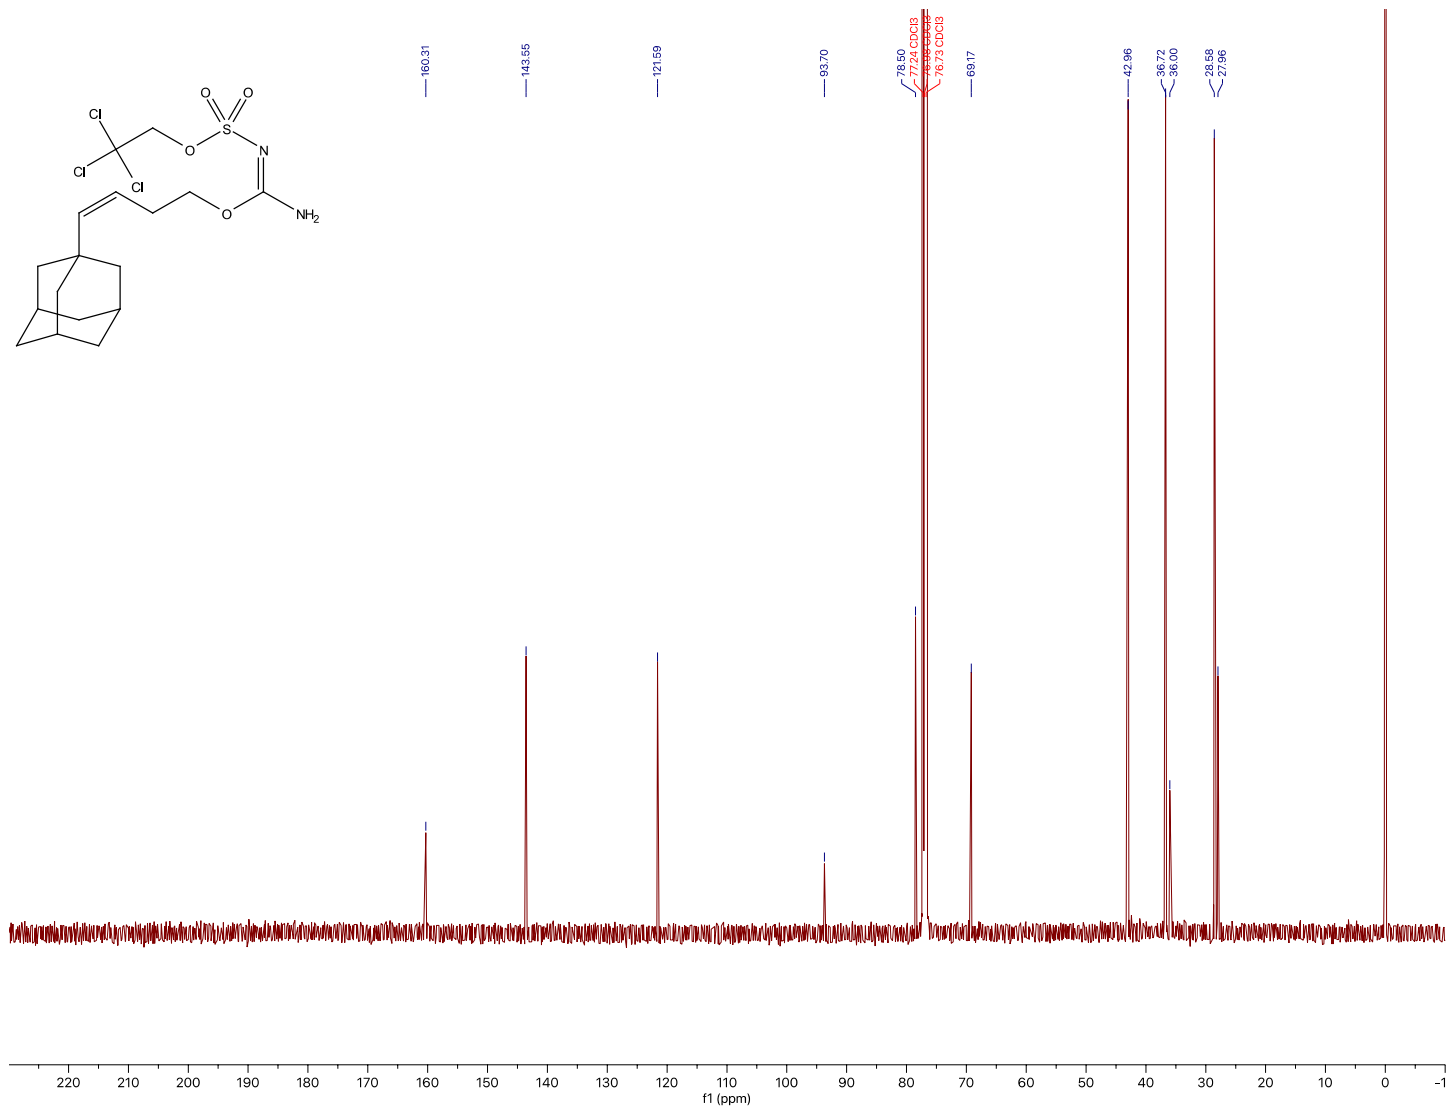



<sup>13</sup>C NMR (126 MHz, CDCl<sub>3</sub>) for **Compound 1n**

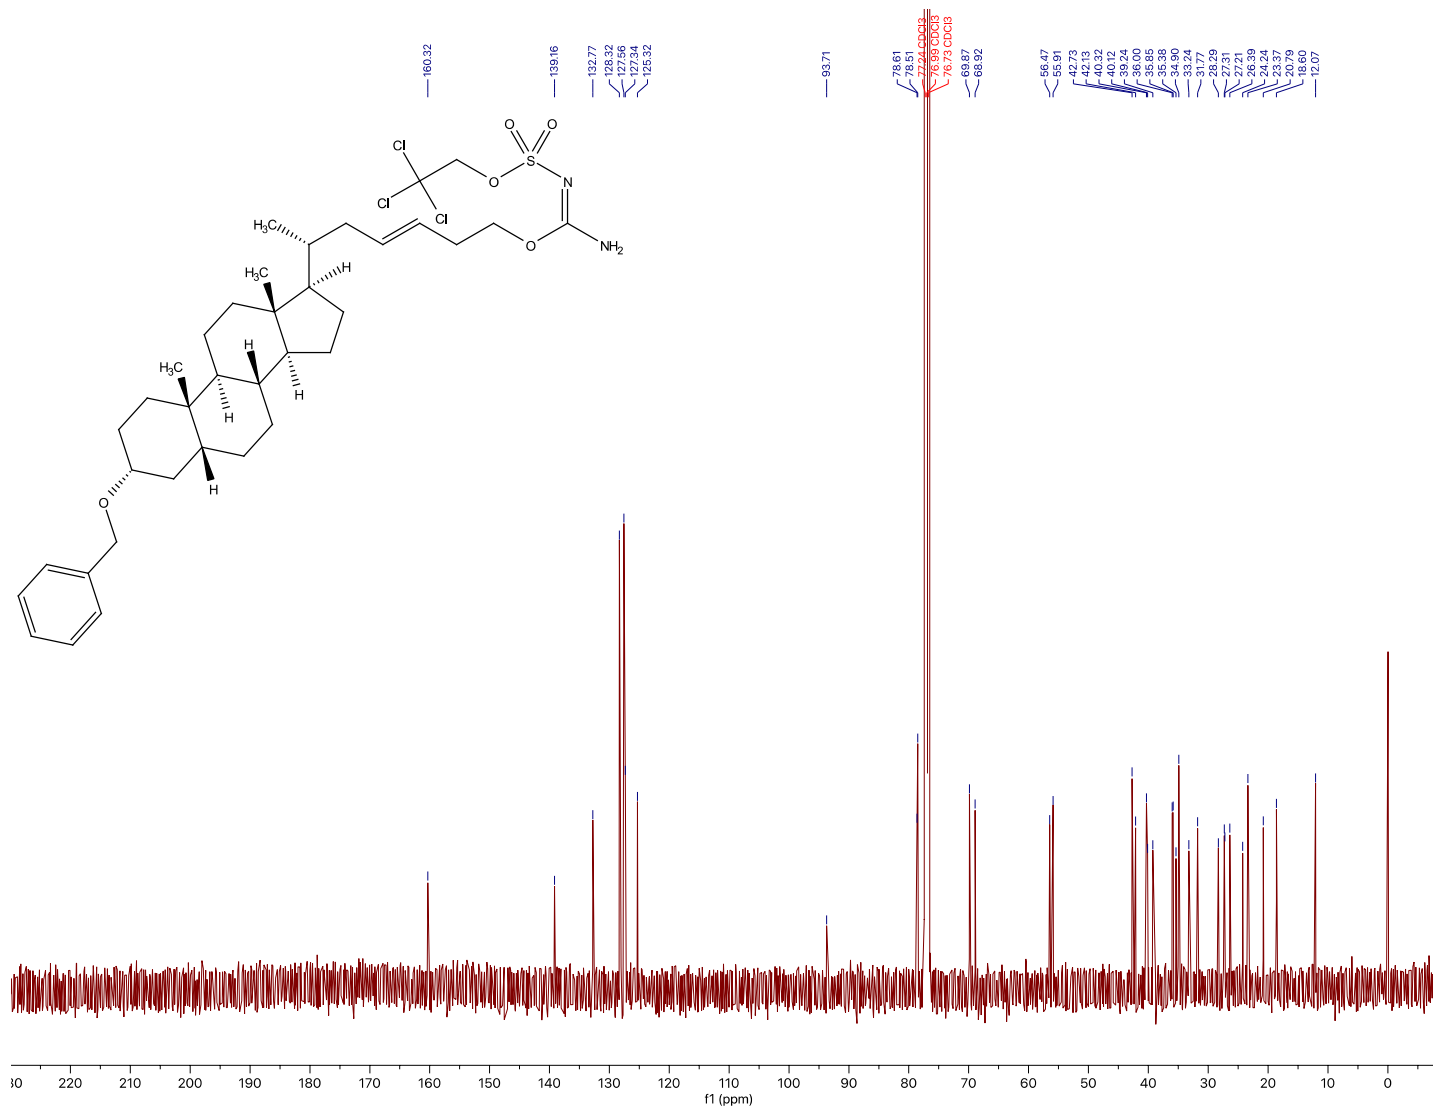

<sup>1</sup>H NMR (500 MHz, CDCl<sub>3</sub>) for **Compound 1o**

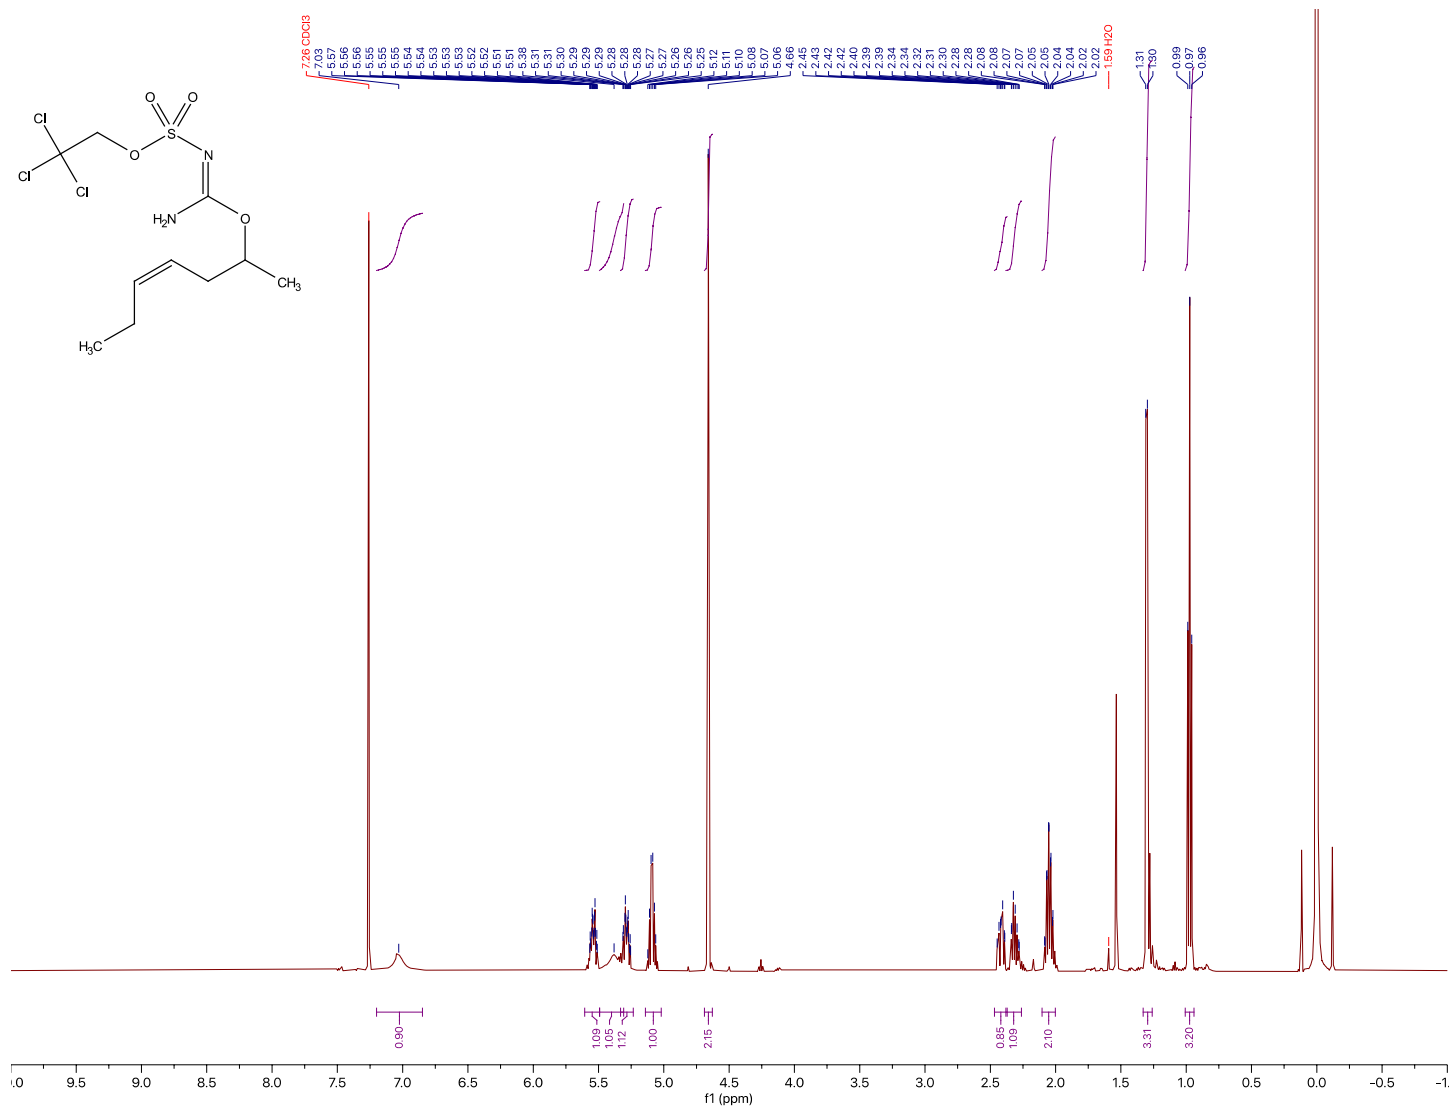

$^{13}\text{C}$  NMR (126 MHz,  $\text{CDCl}_3$ ) for **Compound 1o**

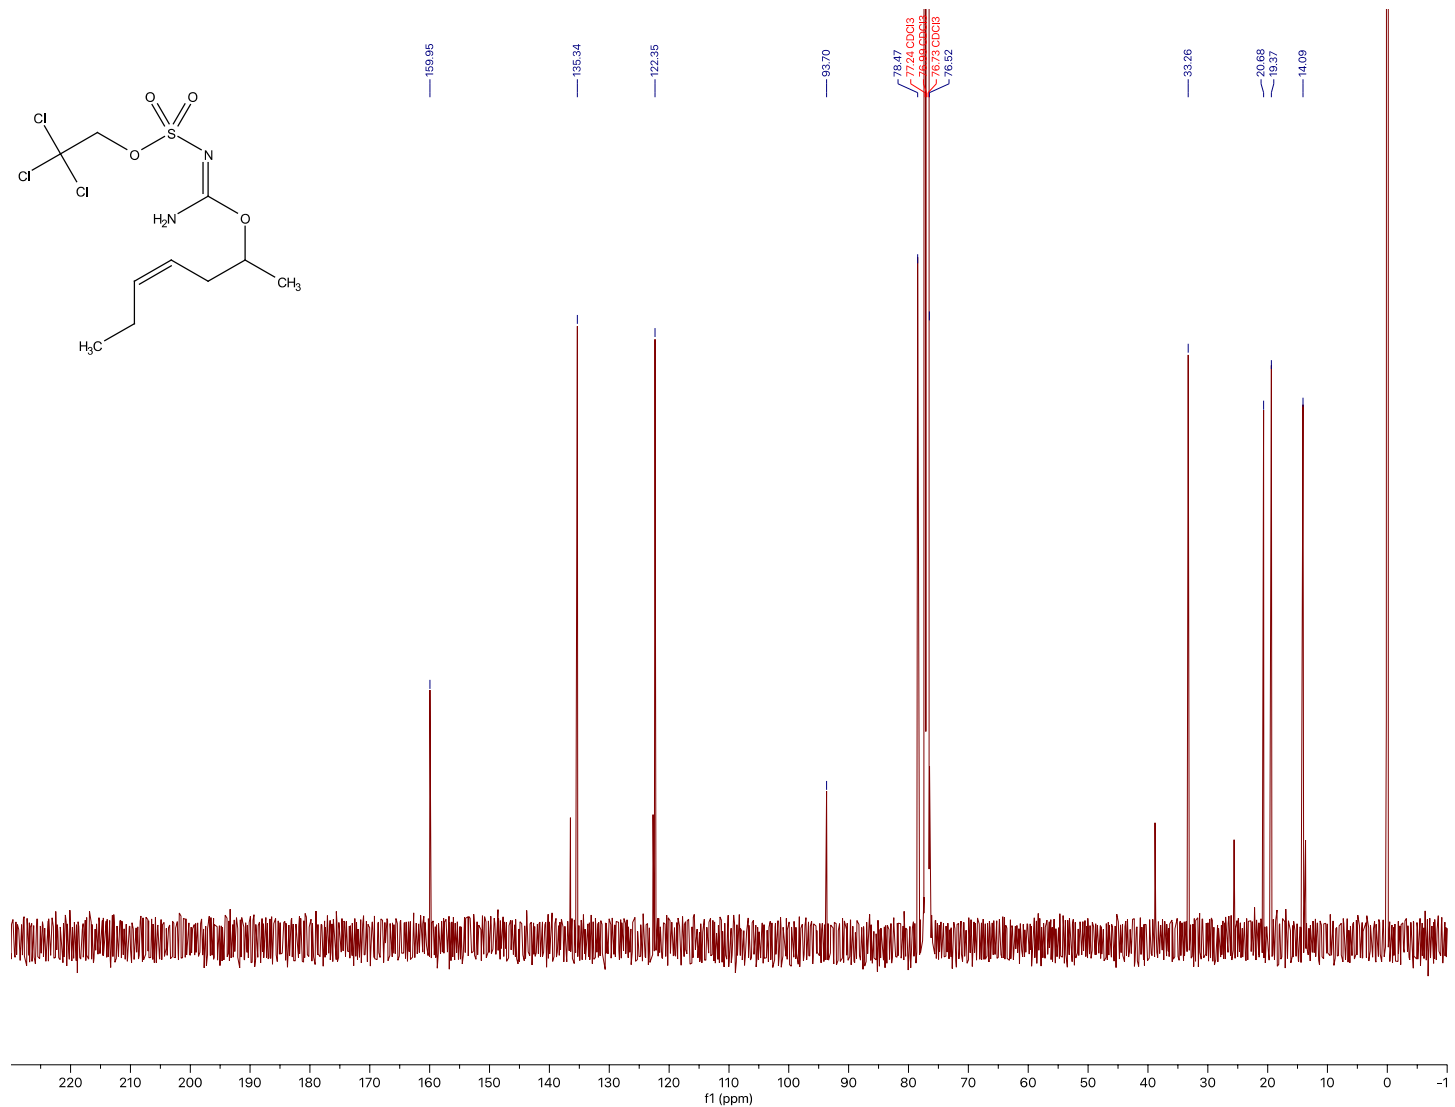

<sup>1</sup>H NMR (500 MHz, CDCl<sub>3</sub>) for Compound 1p

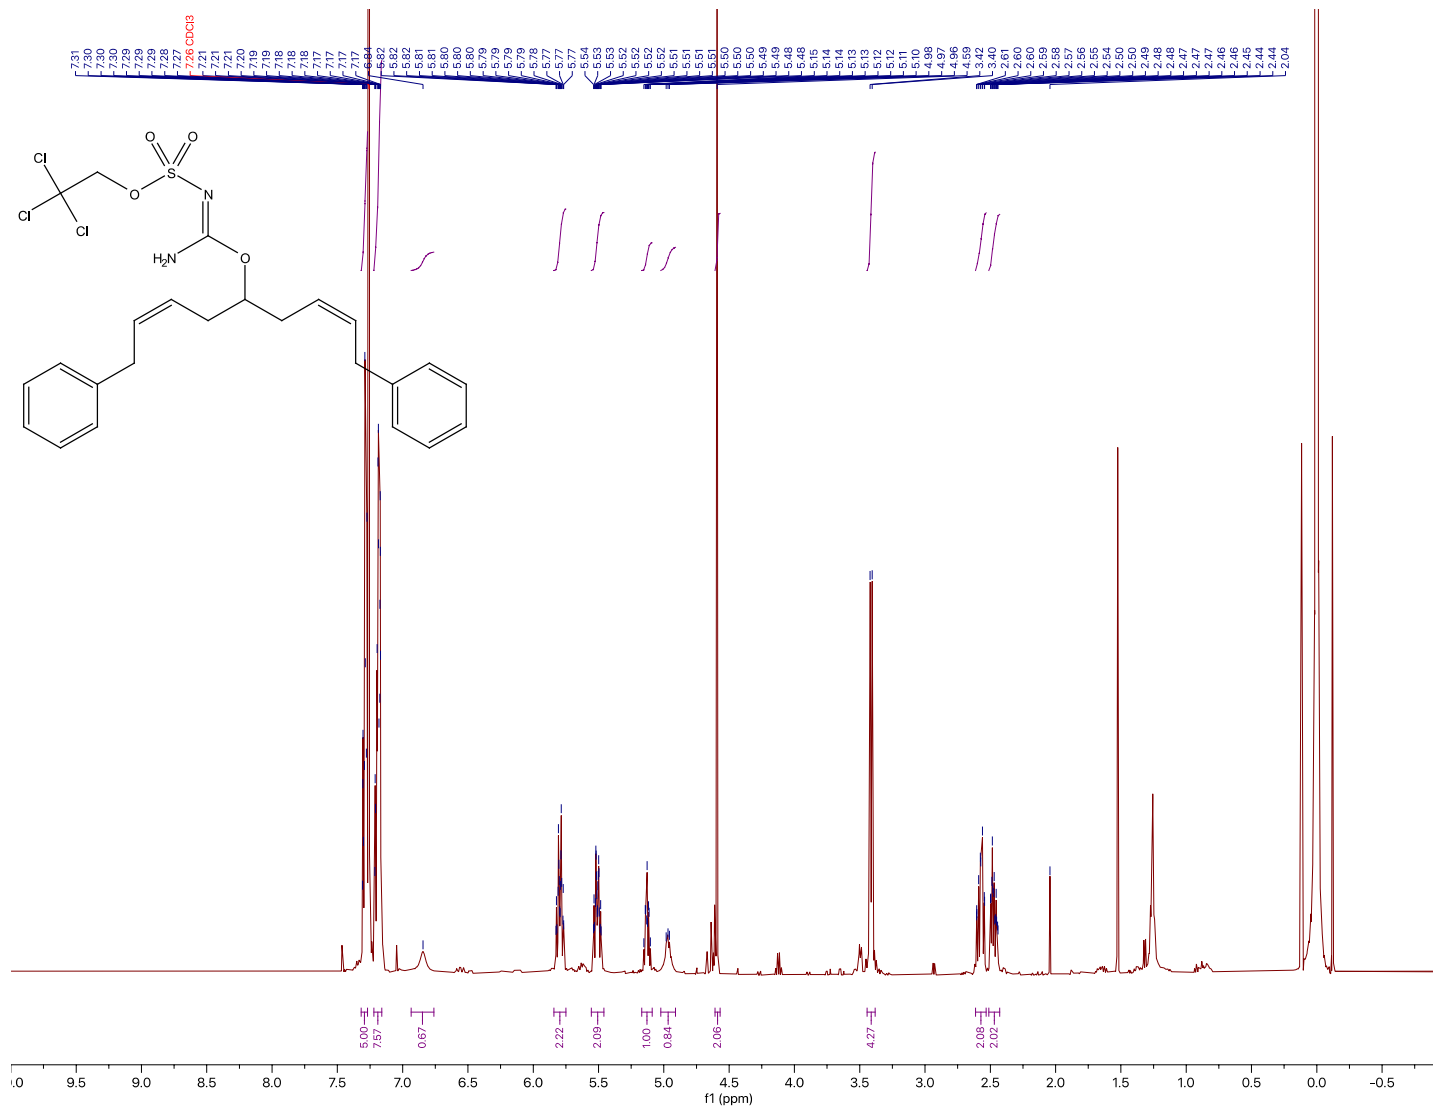



$^{13}\text{C}$  NMR (126 MHz,  $\text{CDCl}_3$ ) for **Compound 1p**

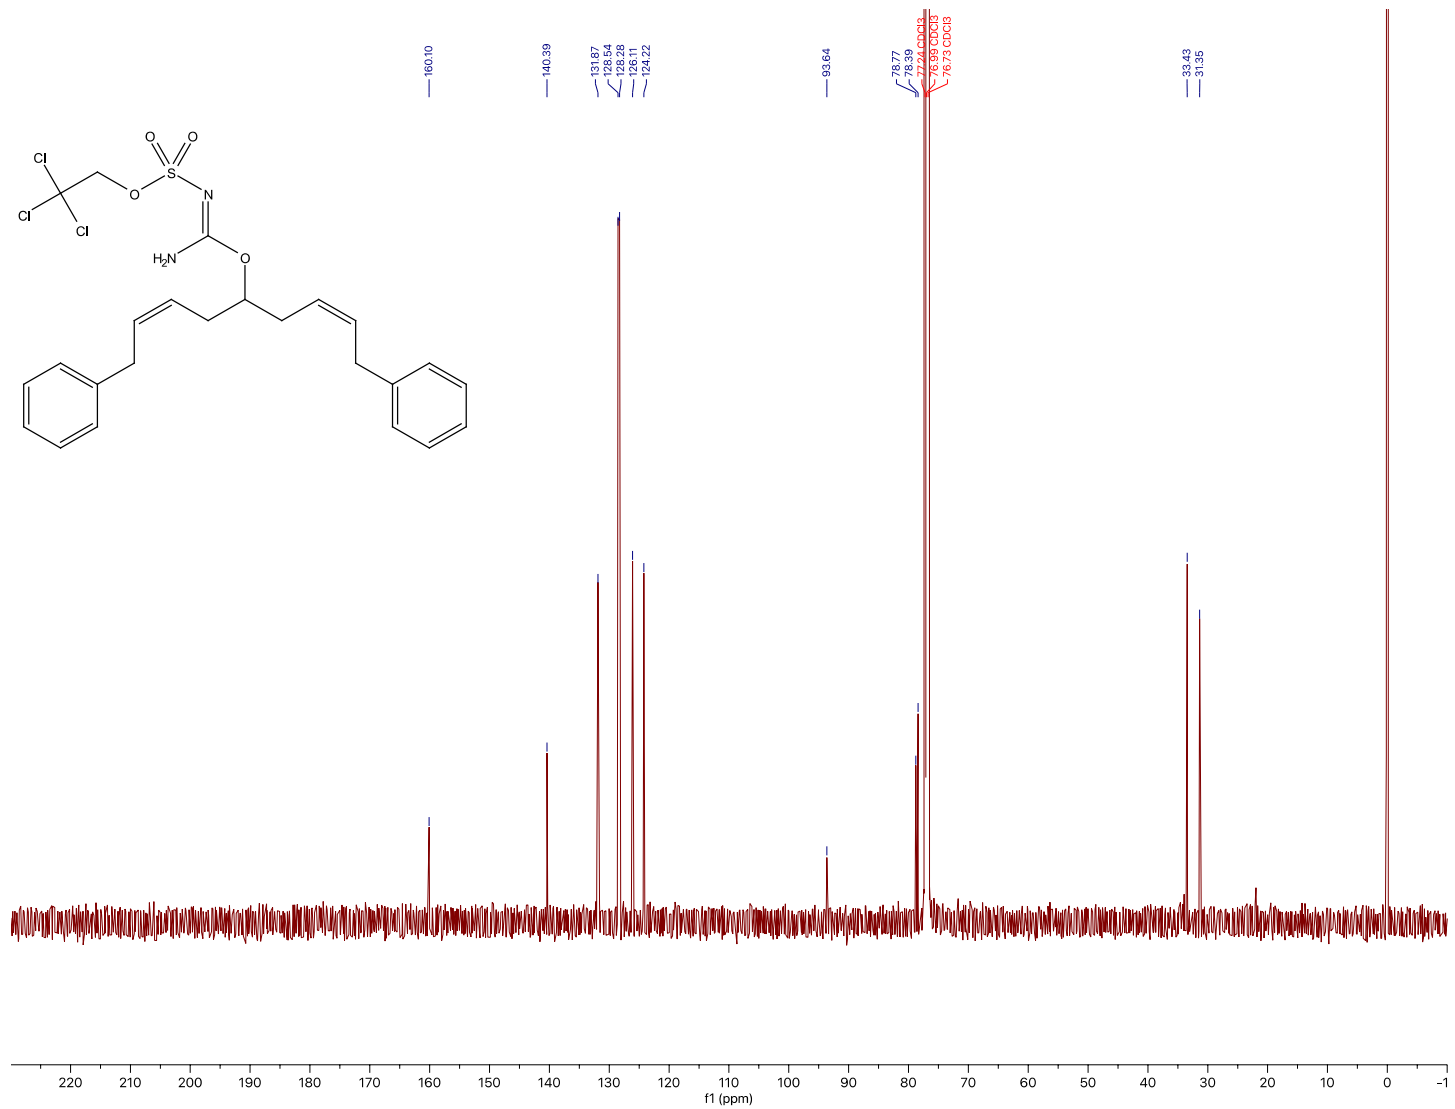

<sup>1</sup>H NMR (500 MHz, CDCl<sub>3</sub>) for Compound 1q

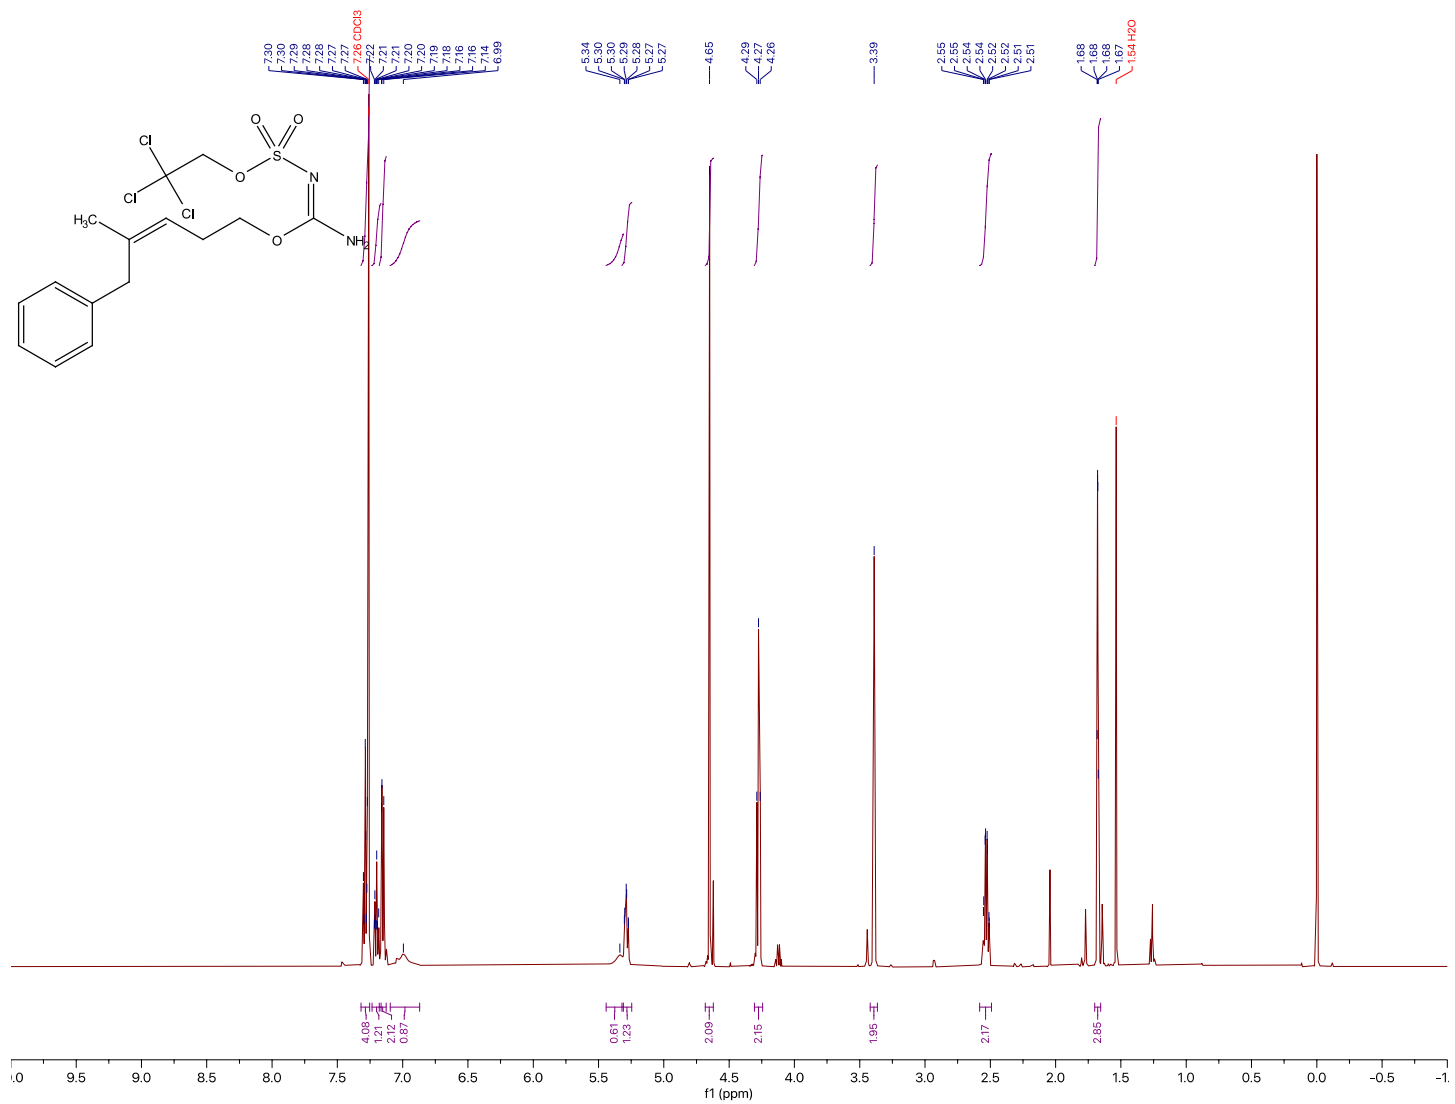

$^{13}\text{C}$  NMR (126 MHz,  $\text{CDCl}_3$ ) for **Compound 1q**

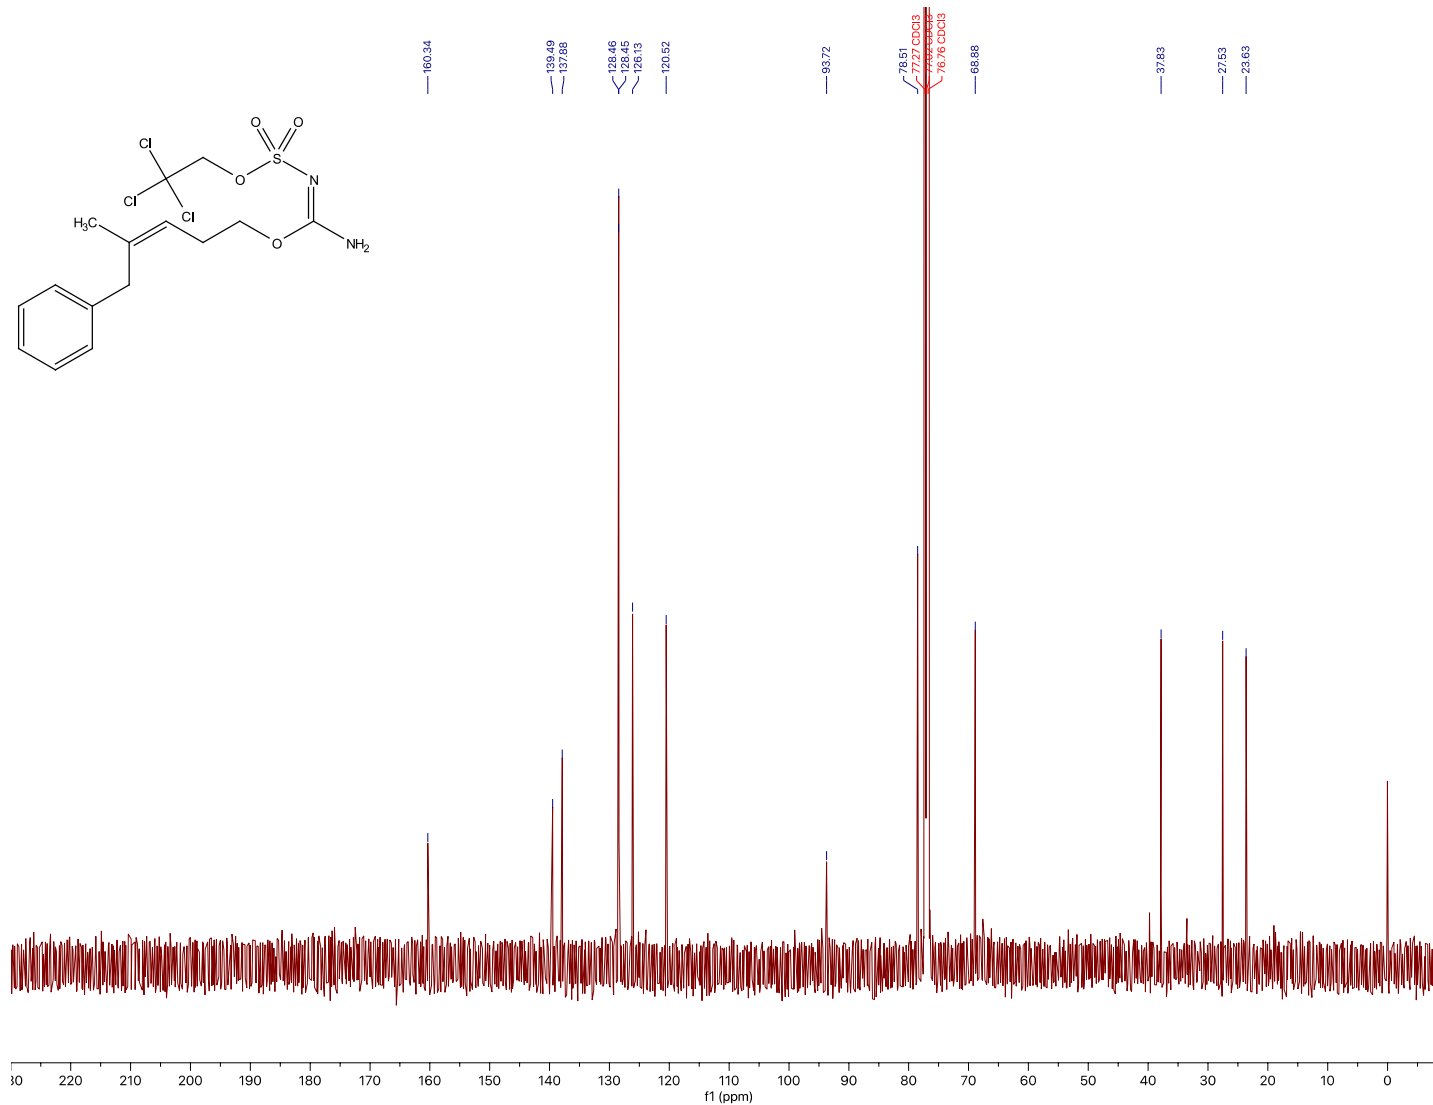

<sup>1</sup>H NMR (500 MHz, CDCl<sub>3</sub>) for **Compound 1r**

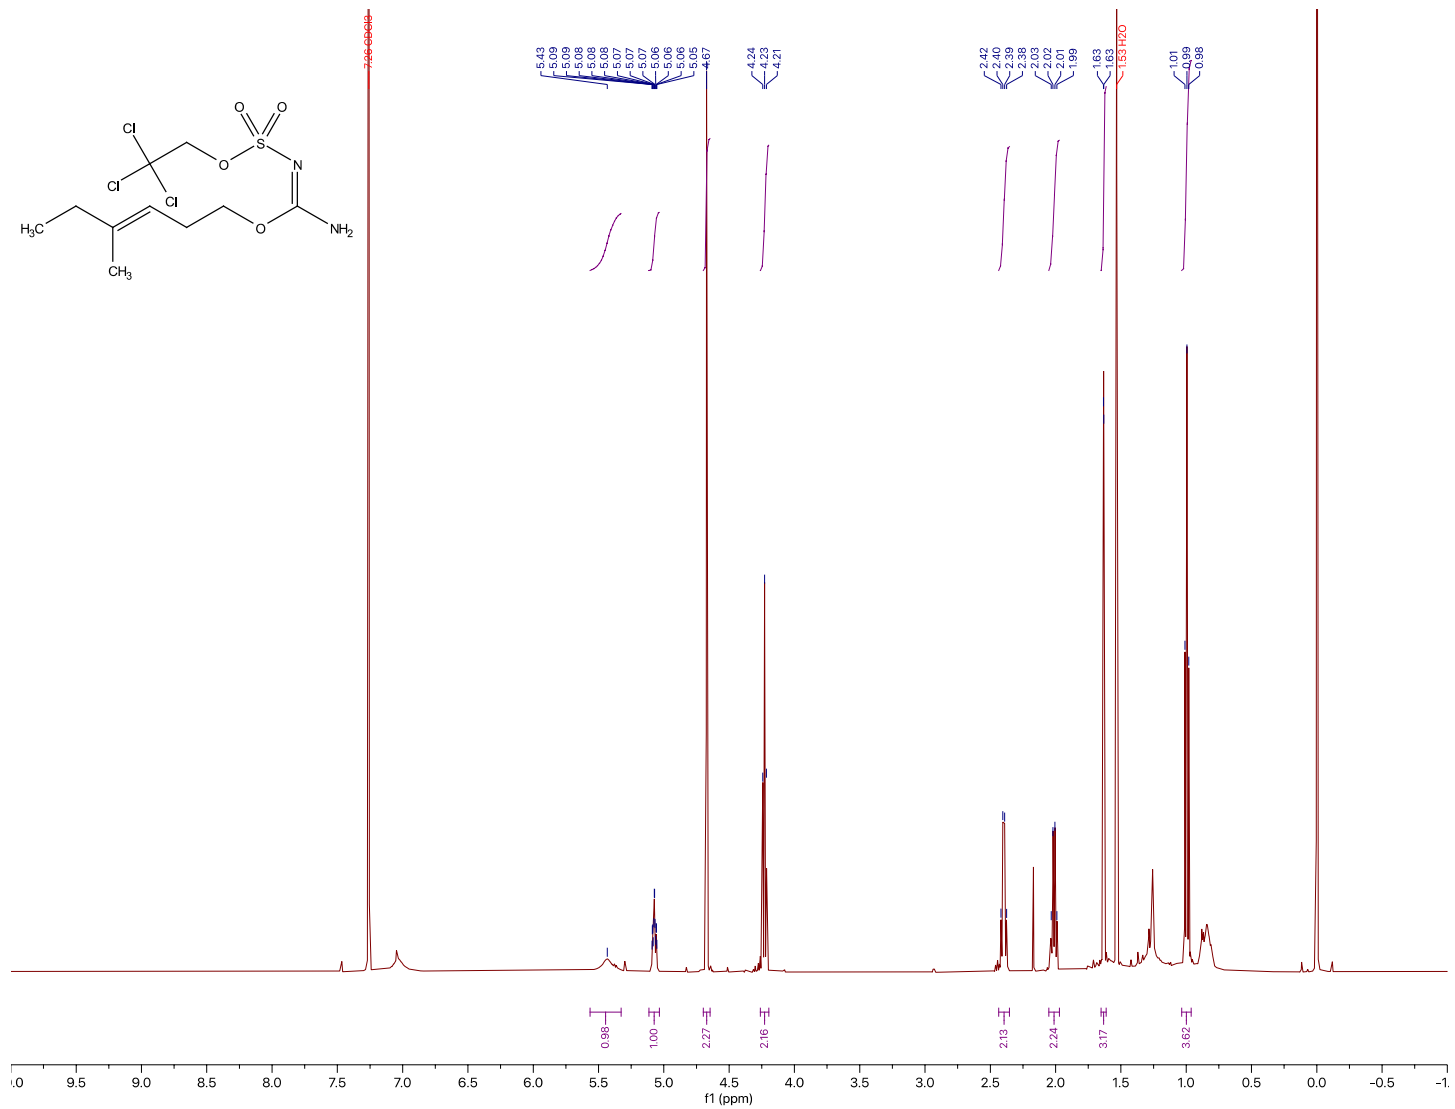

$^{13}\text{C}$  NMR (126 MHz,  $\text{CDCl}_3$ ) for **Compound 1r**

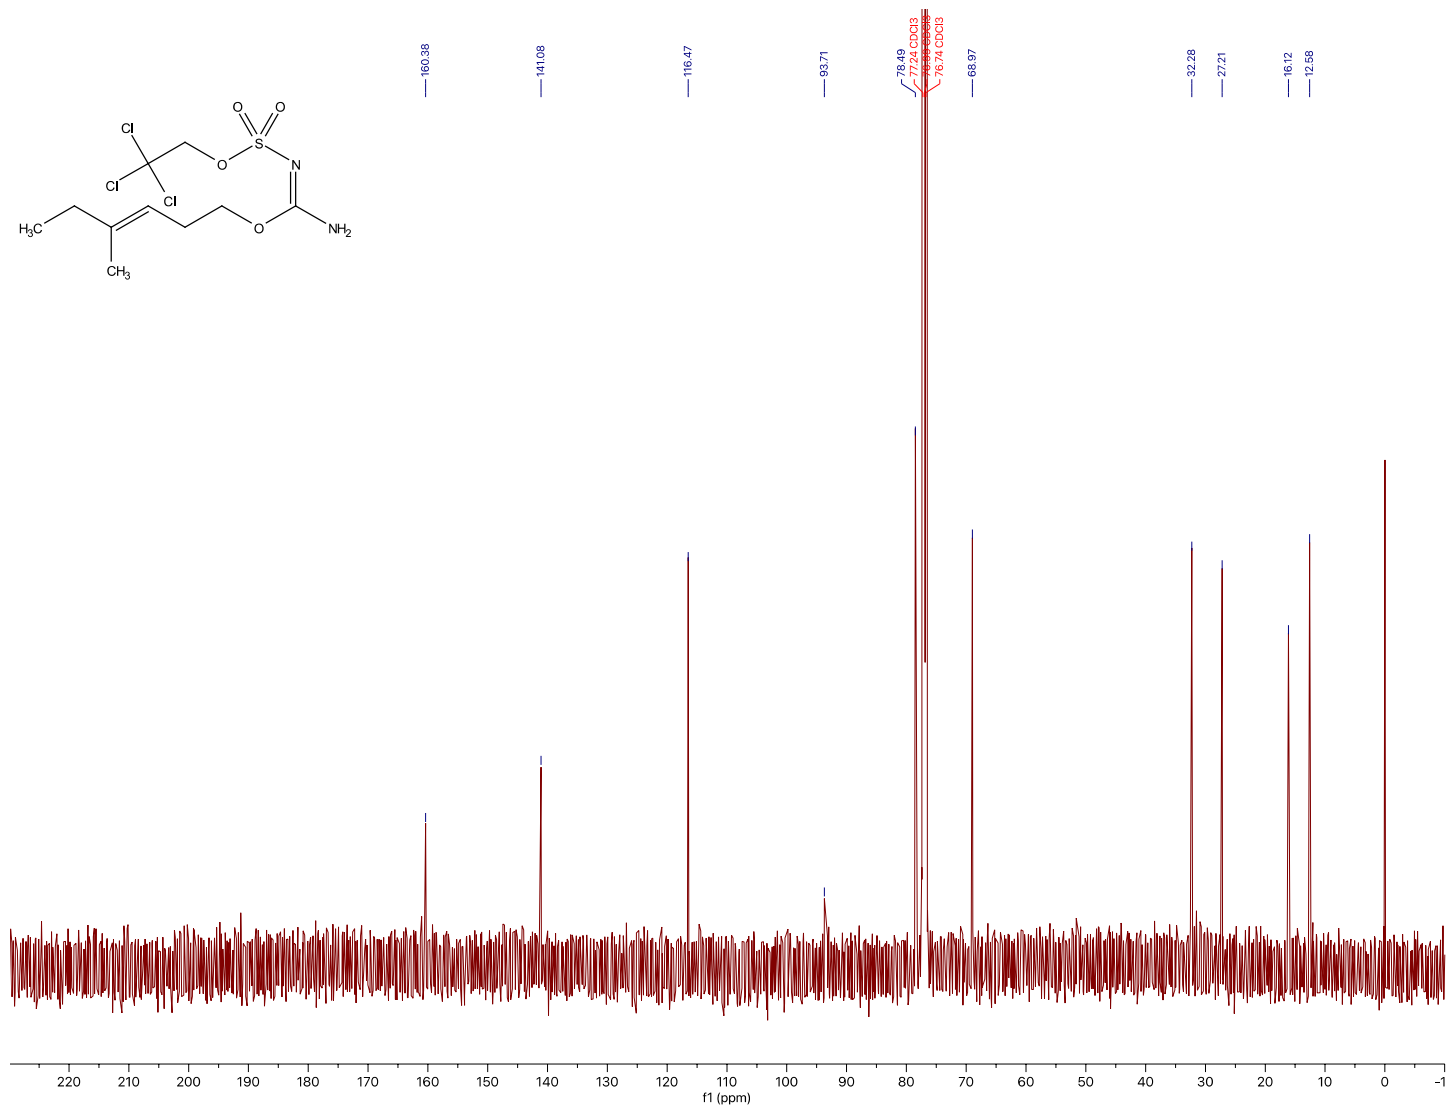

<sup>1</sup>H NMR (500 MHz, CDCl<sub>3</sub>) for **Compound 1s**

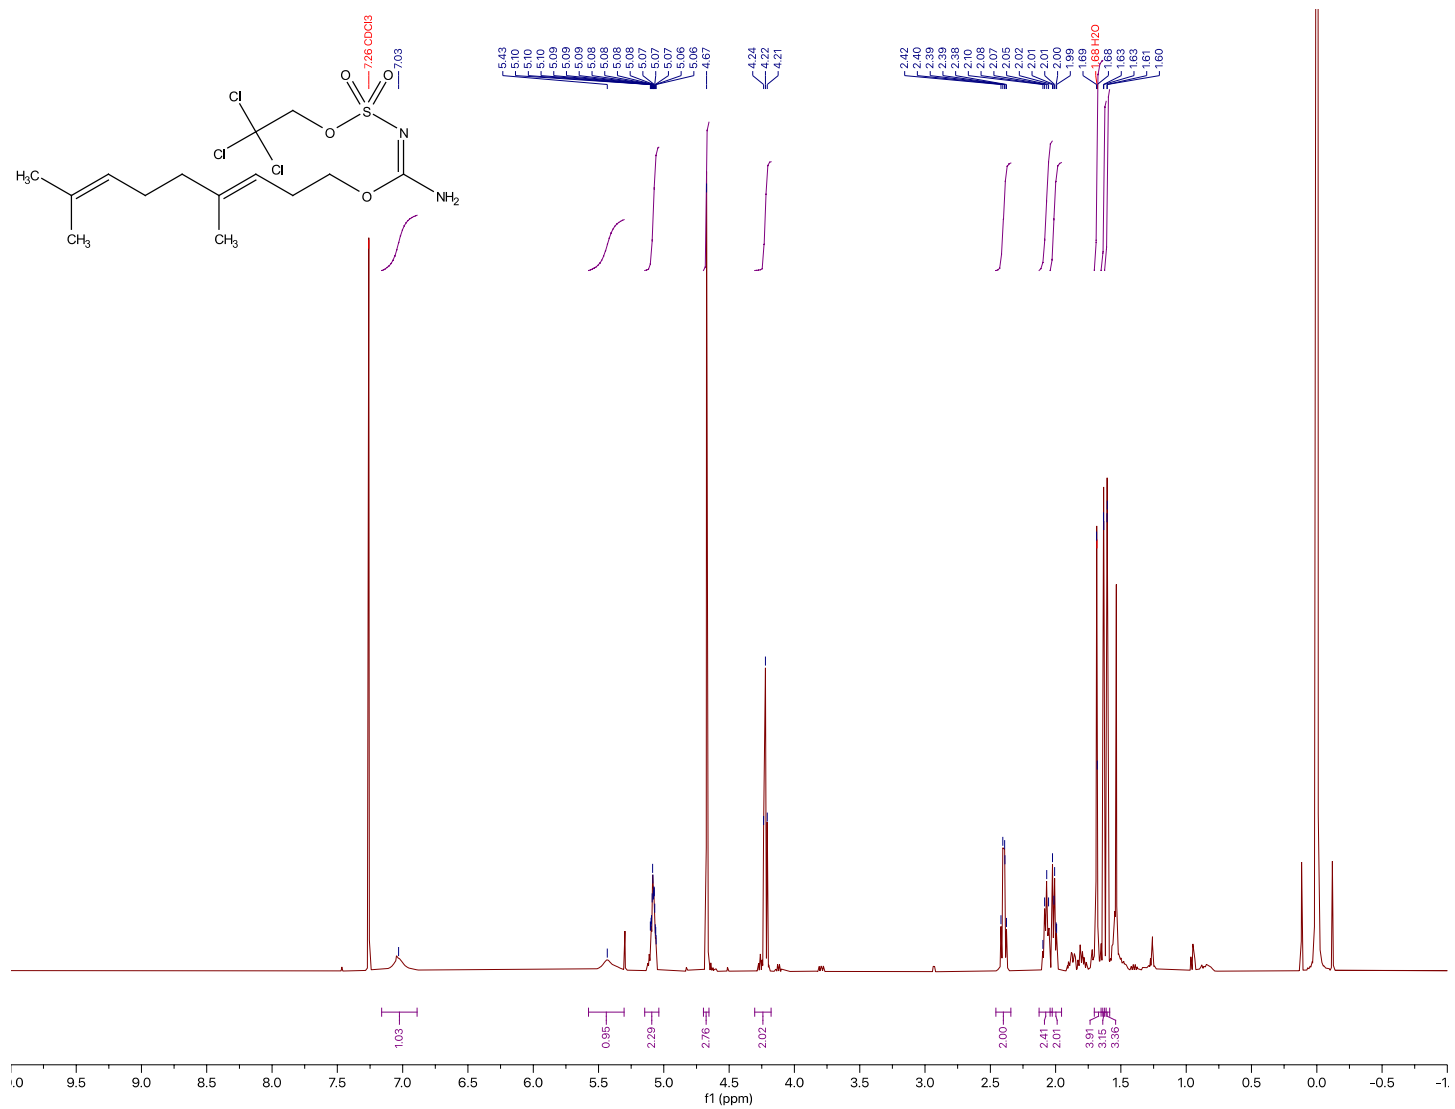

$^{13}\text{C}$  NMR (126 MHz,  $\text{CDCl}_3$ ) for **Compound 1s**

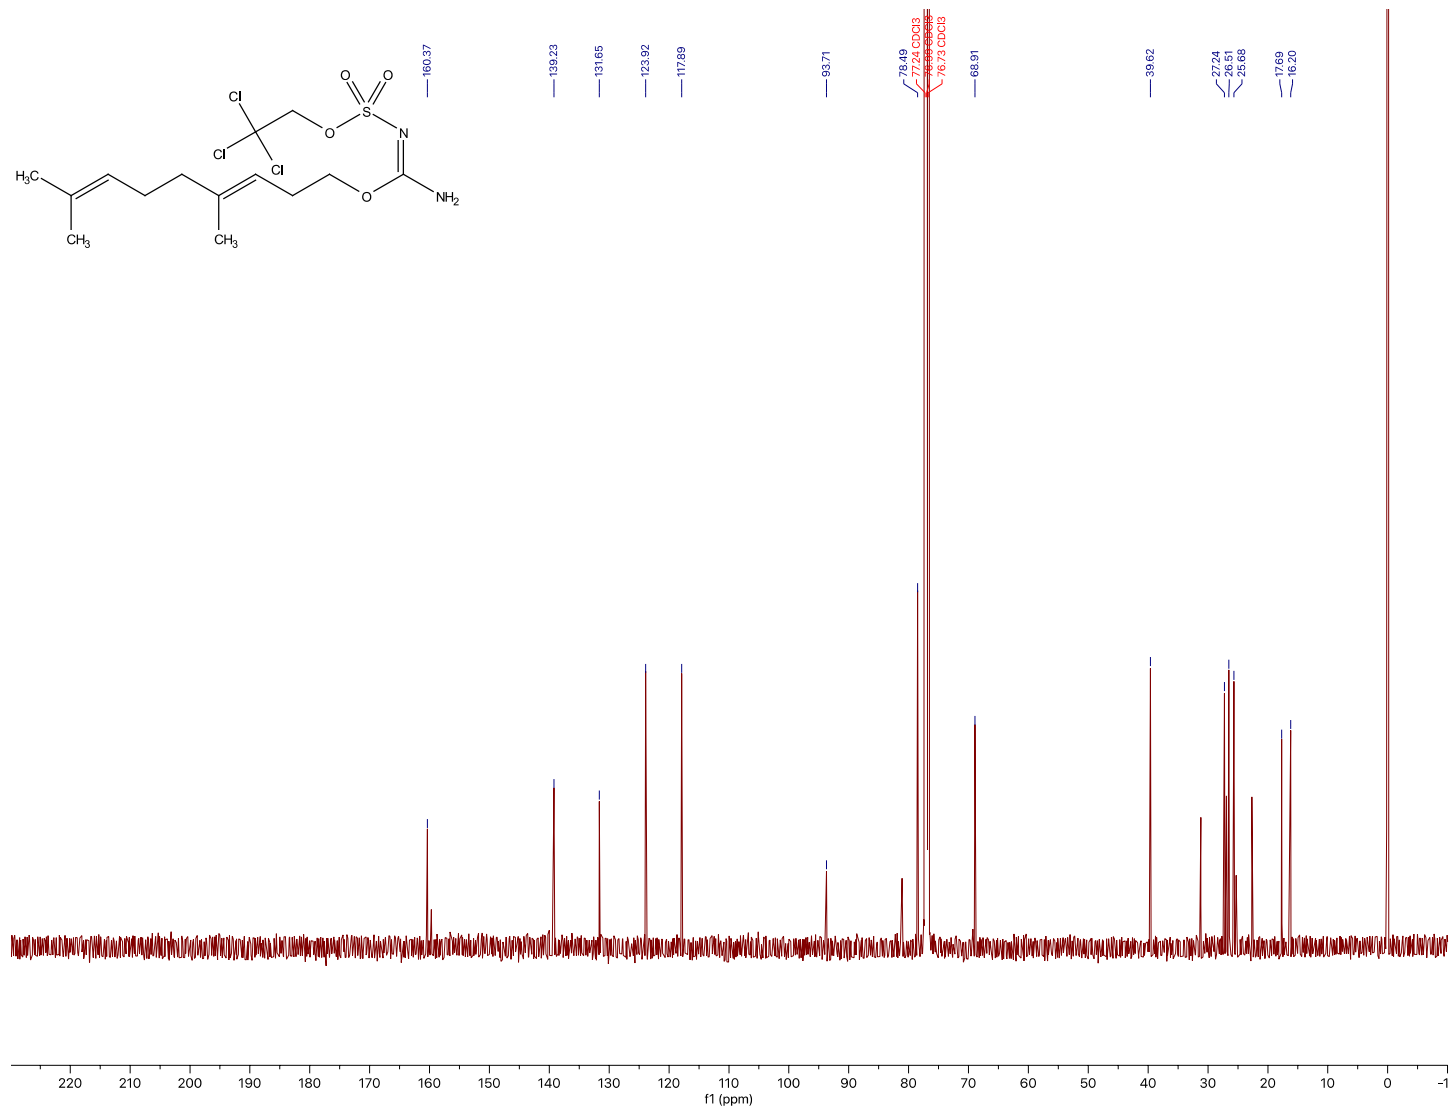

<sup>1</sup>H NMR (500 MHz, CDCl<sub>3</sub>) for **Compound 1t**

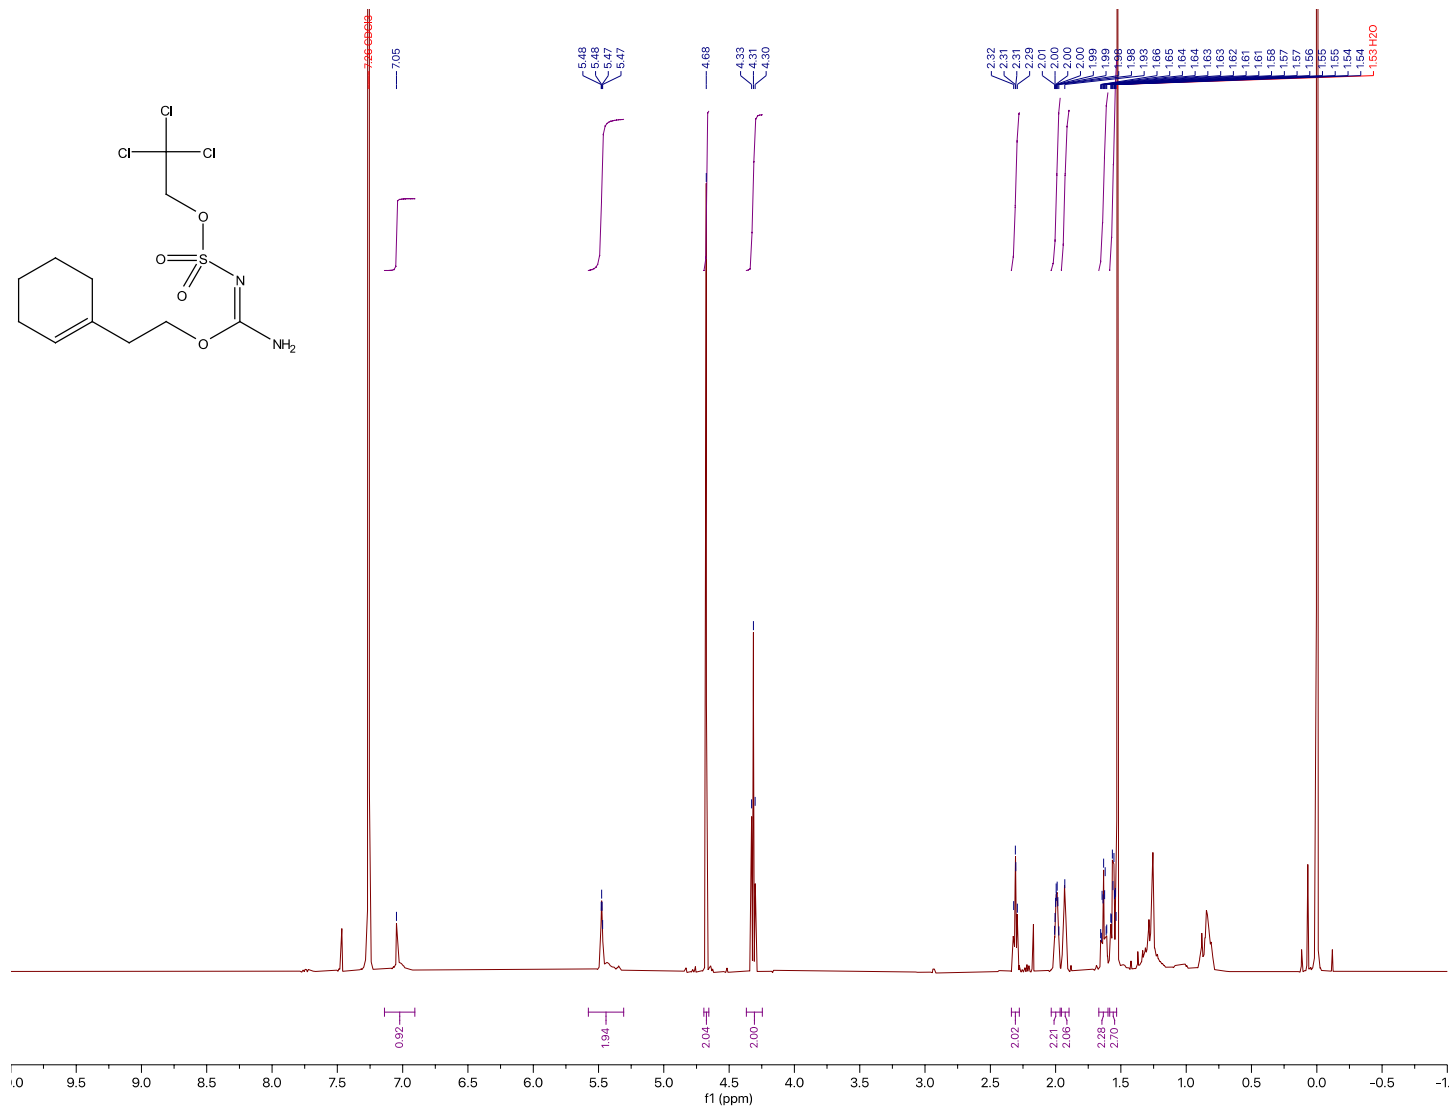



$^{13}\text{C}$  NMR (126 MHz,  $\text{CDCl}_3$ ) for **Compound 1t**

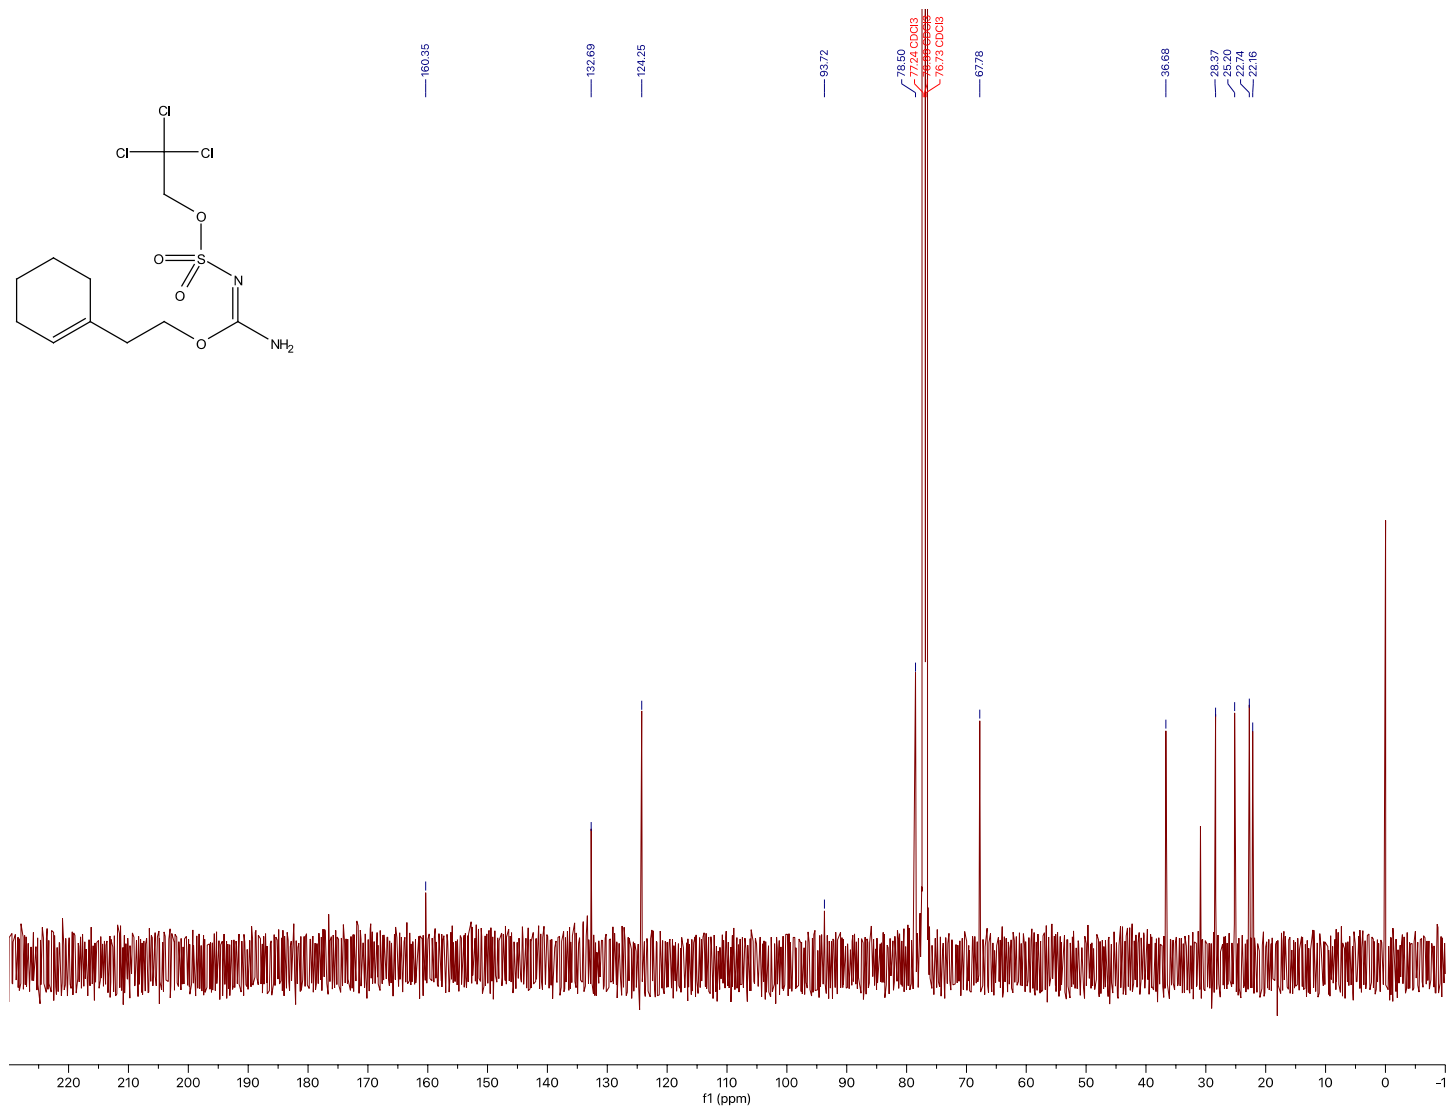

<sup>1</sup>H NMR (500 MHz, CDCl<sub>3</sub>) for **Compound 1u**

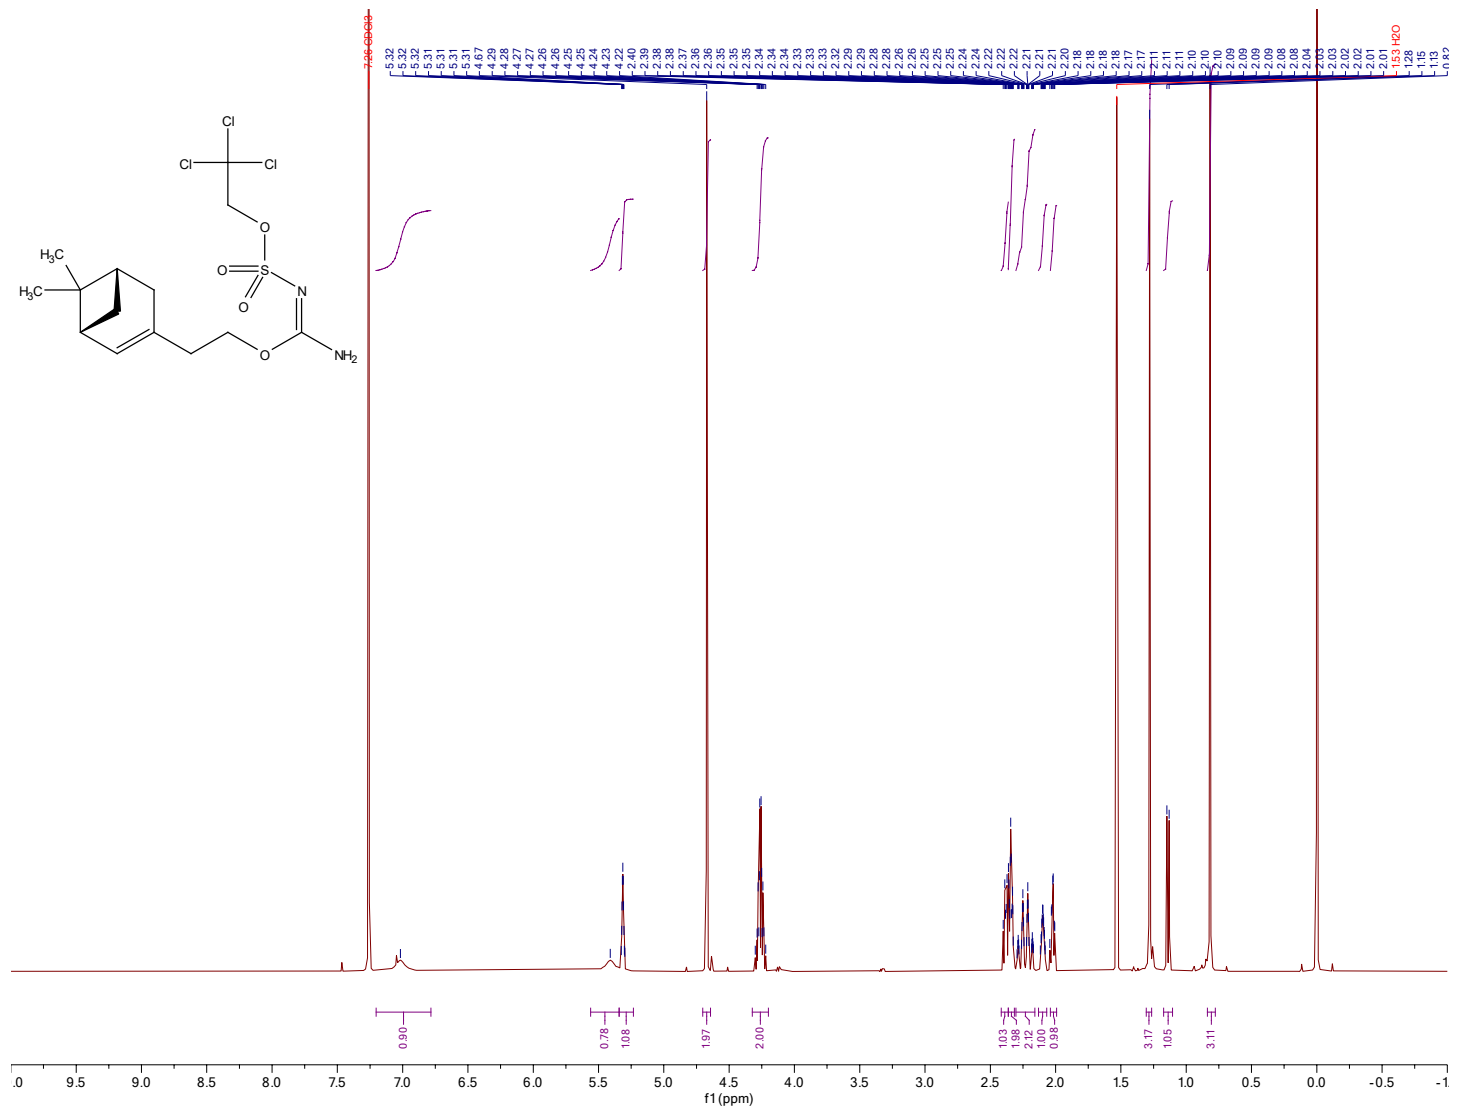

$^{13}\text{C}$  NMR (126 MHz,  $\text{CDCl}_3$ ) for **Compound 1u**

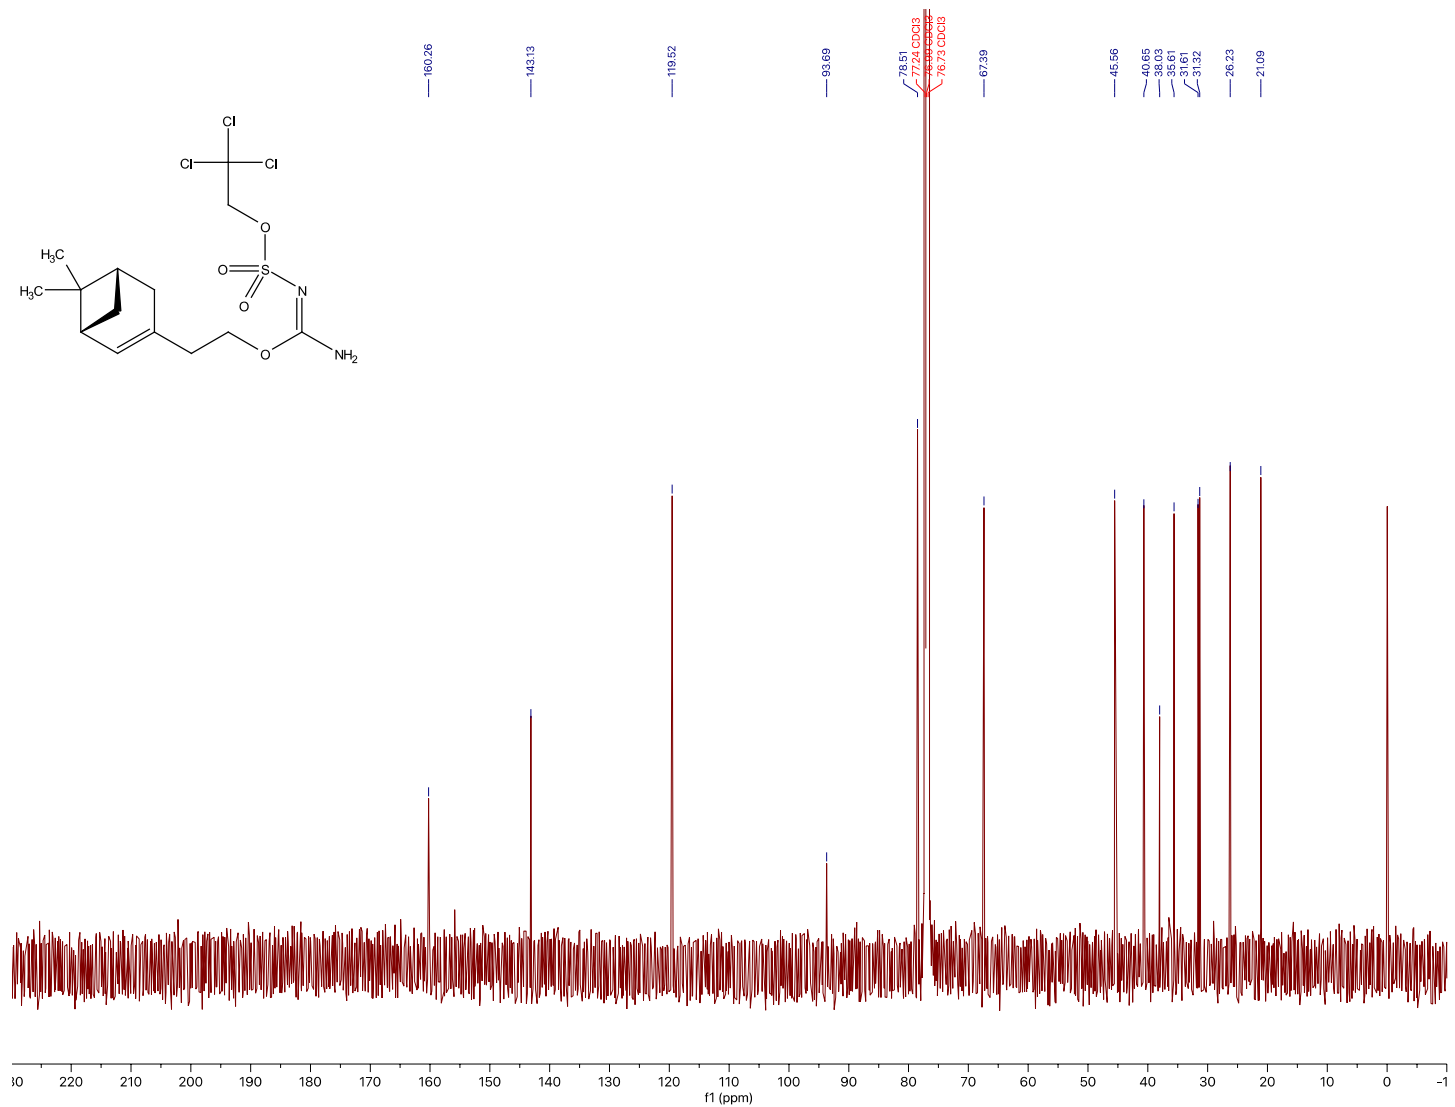

<sup>1</sup>H NMR (500 MHz, CDCl<sub>3</sub>) for **Compound 1v**

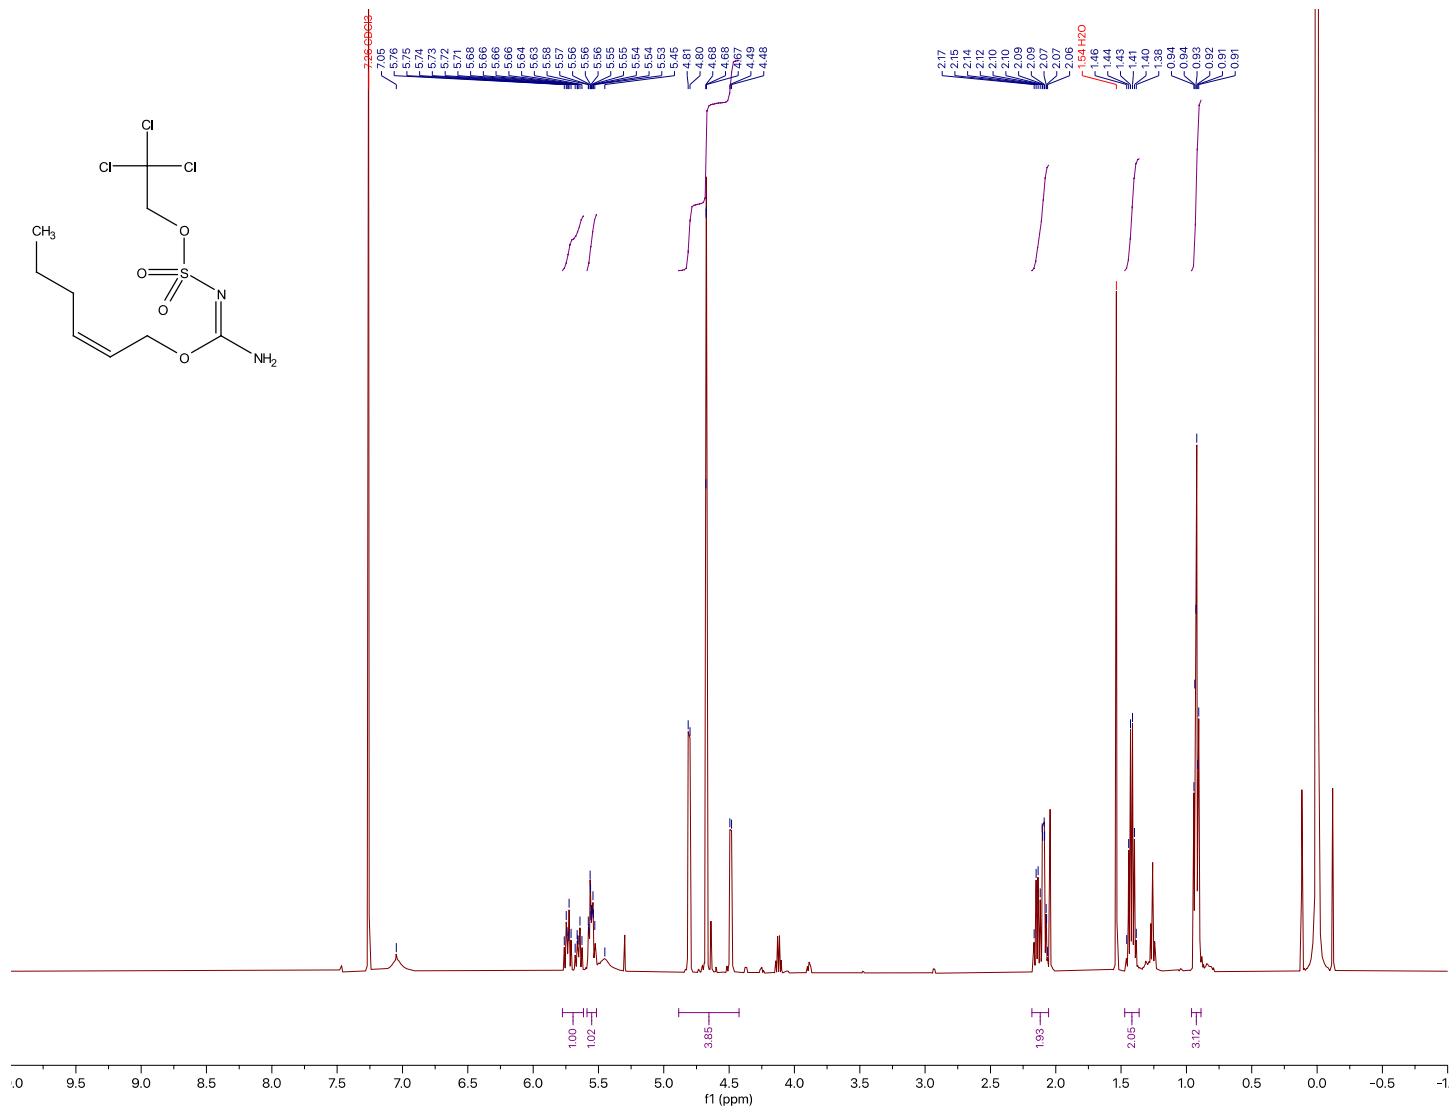

$^{13}\text{C}$  NMR (126 MHz,  $\text{CDCl}_3$ ) for **Compound 1v**

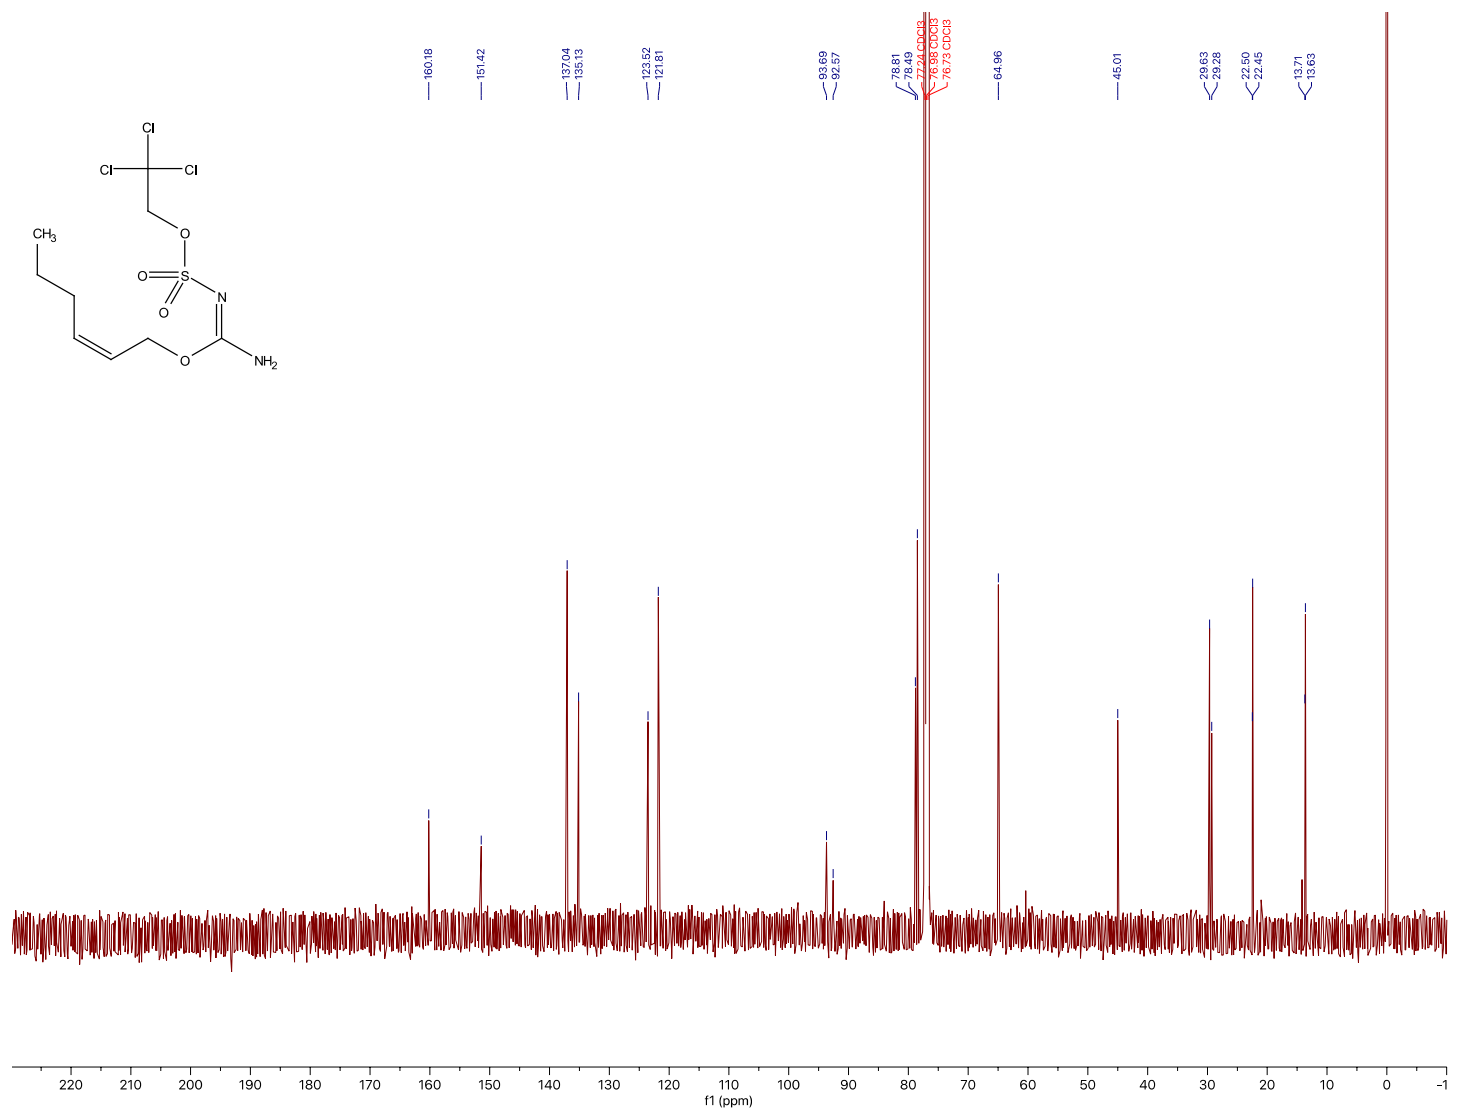

<sup>1</sup>H NMR (500 MHz, CDCl<sub>3</sub>) for **Compound 1w**

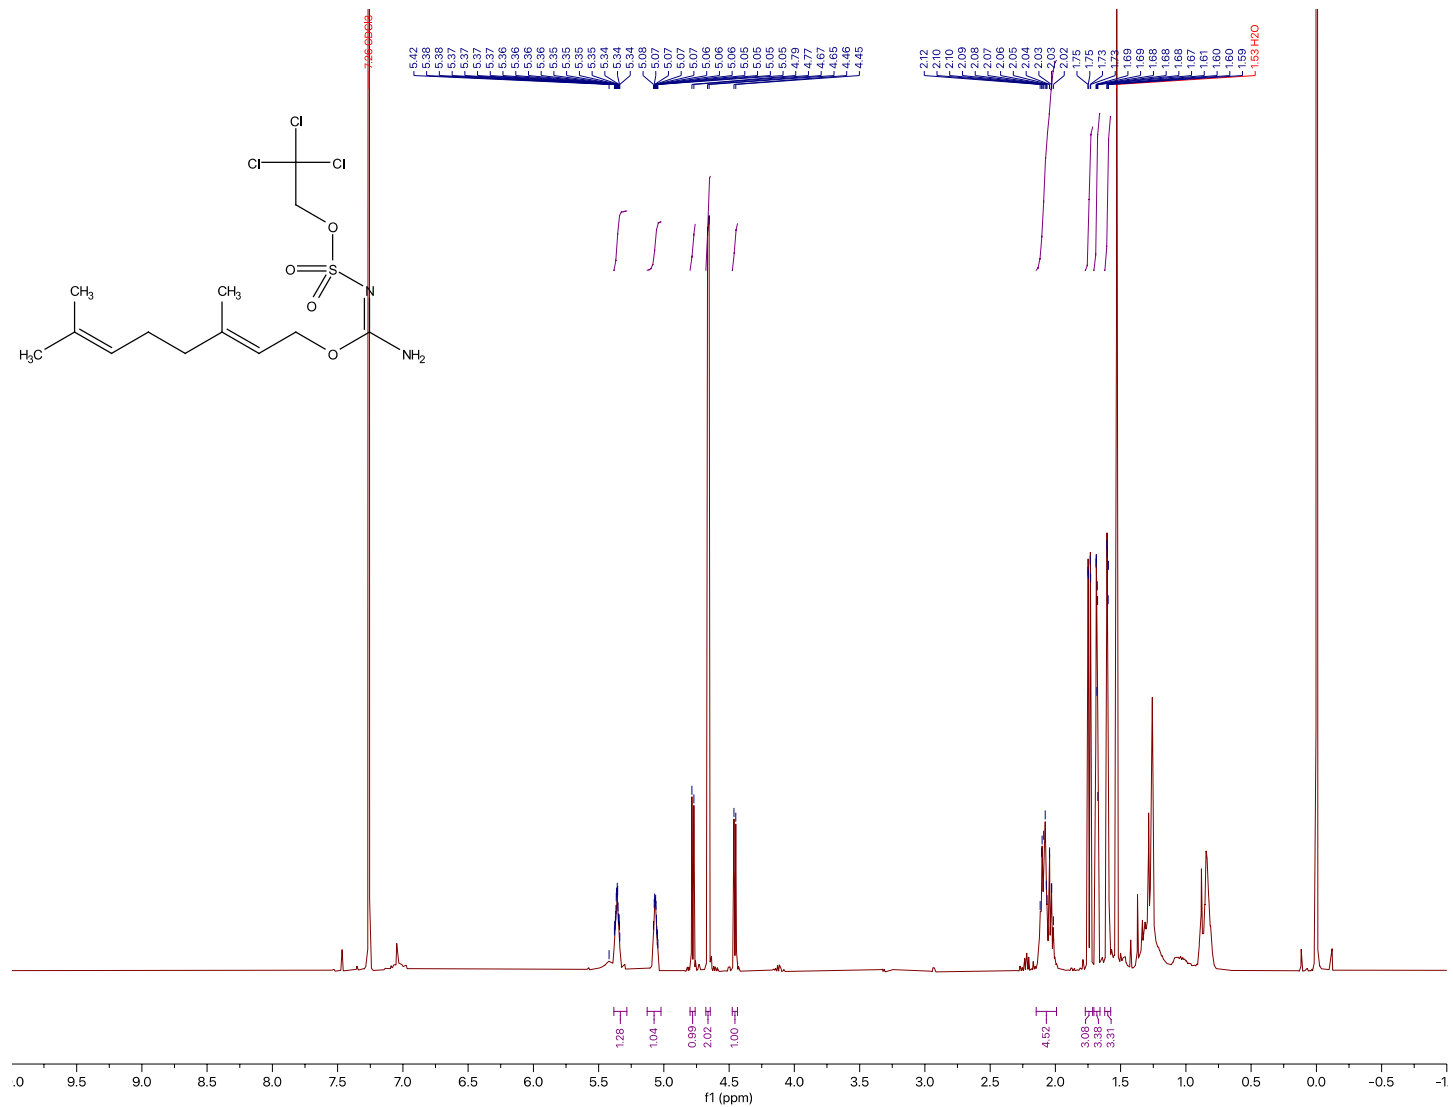

<sup>13</sup>C NMR (126 MHz, CDCl<sub>3</sub>) for **Compound 1w**

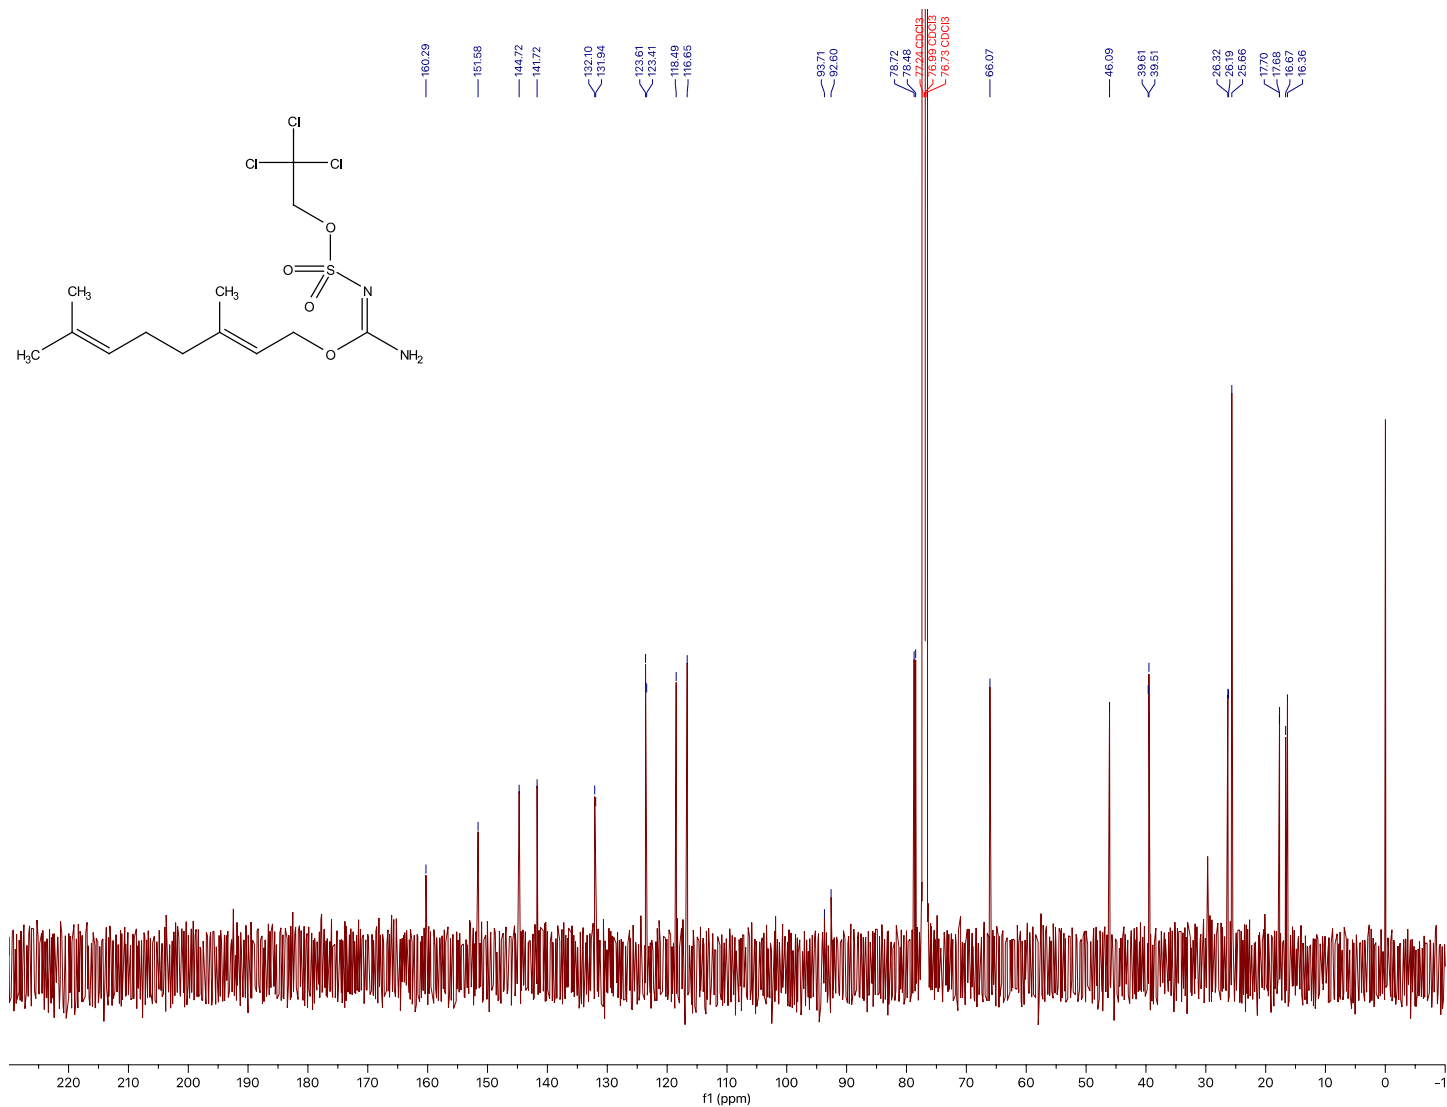

<sup>1</sup>H NMR (500 MHz, CDCl<sub>3</sub>) for **Compound 1x**

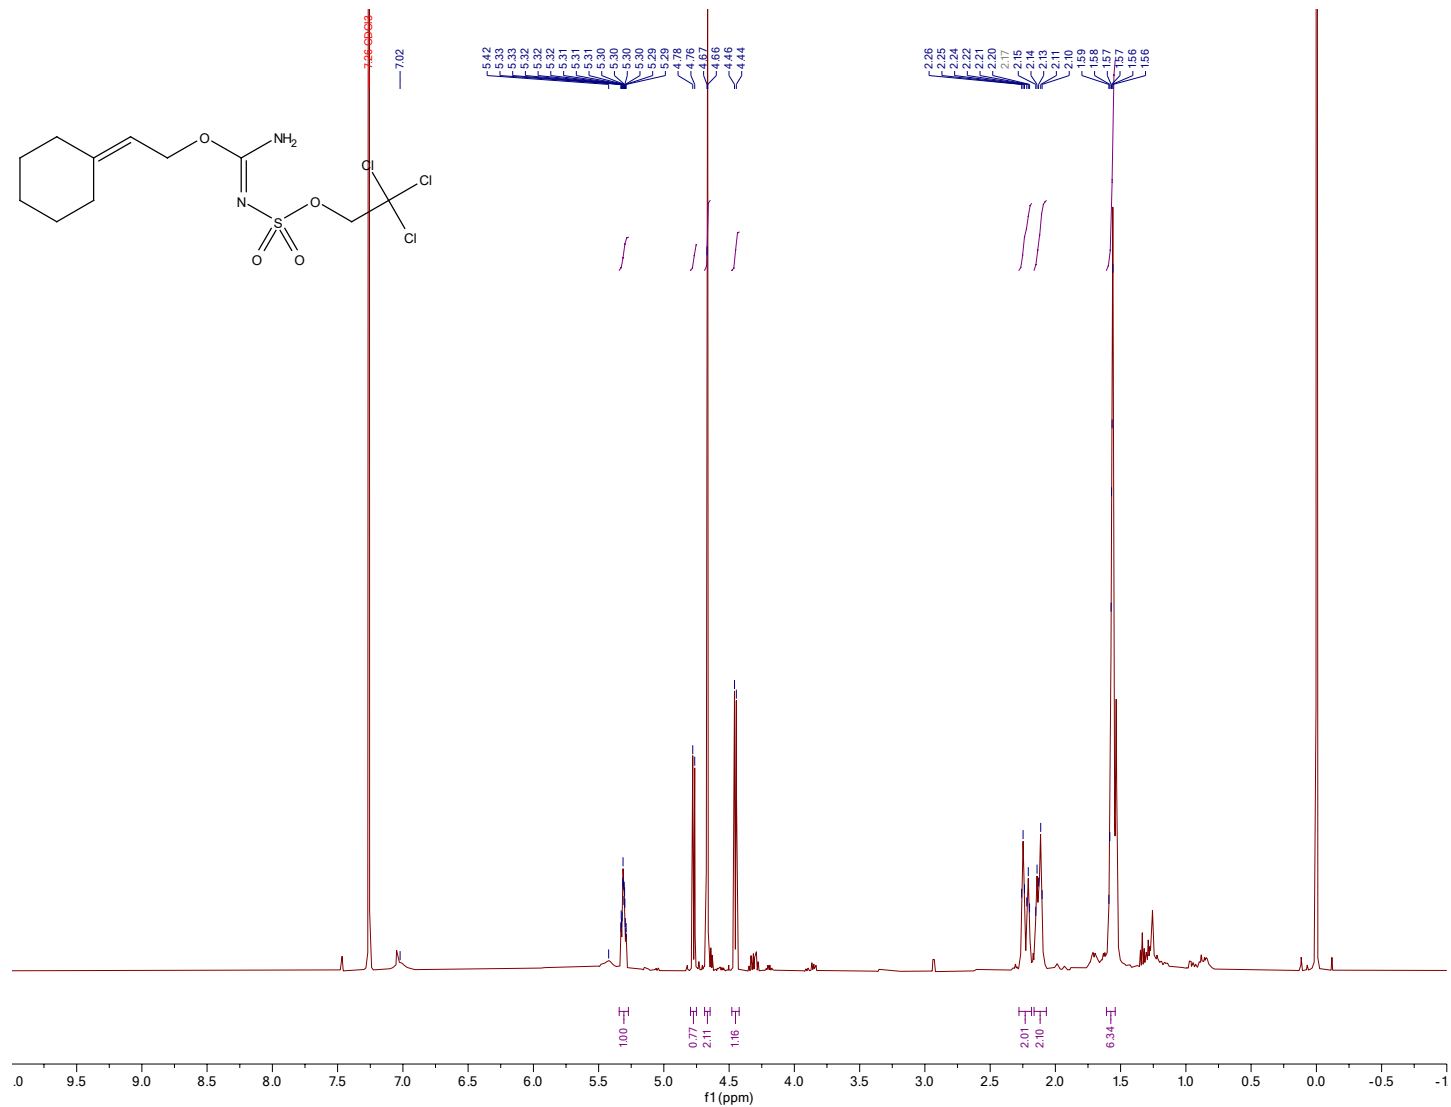



$^{13}\text{C}$  NMR (126 MHz,  $\text{CDCl}_3$ ) for **Compound 1x**

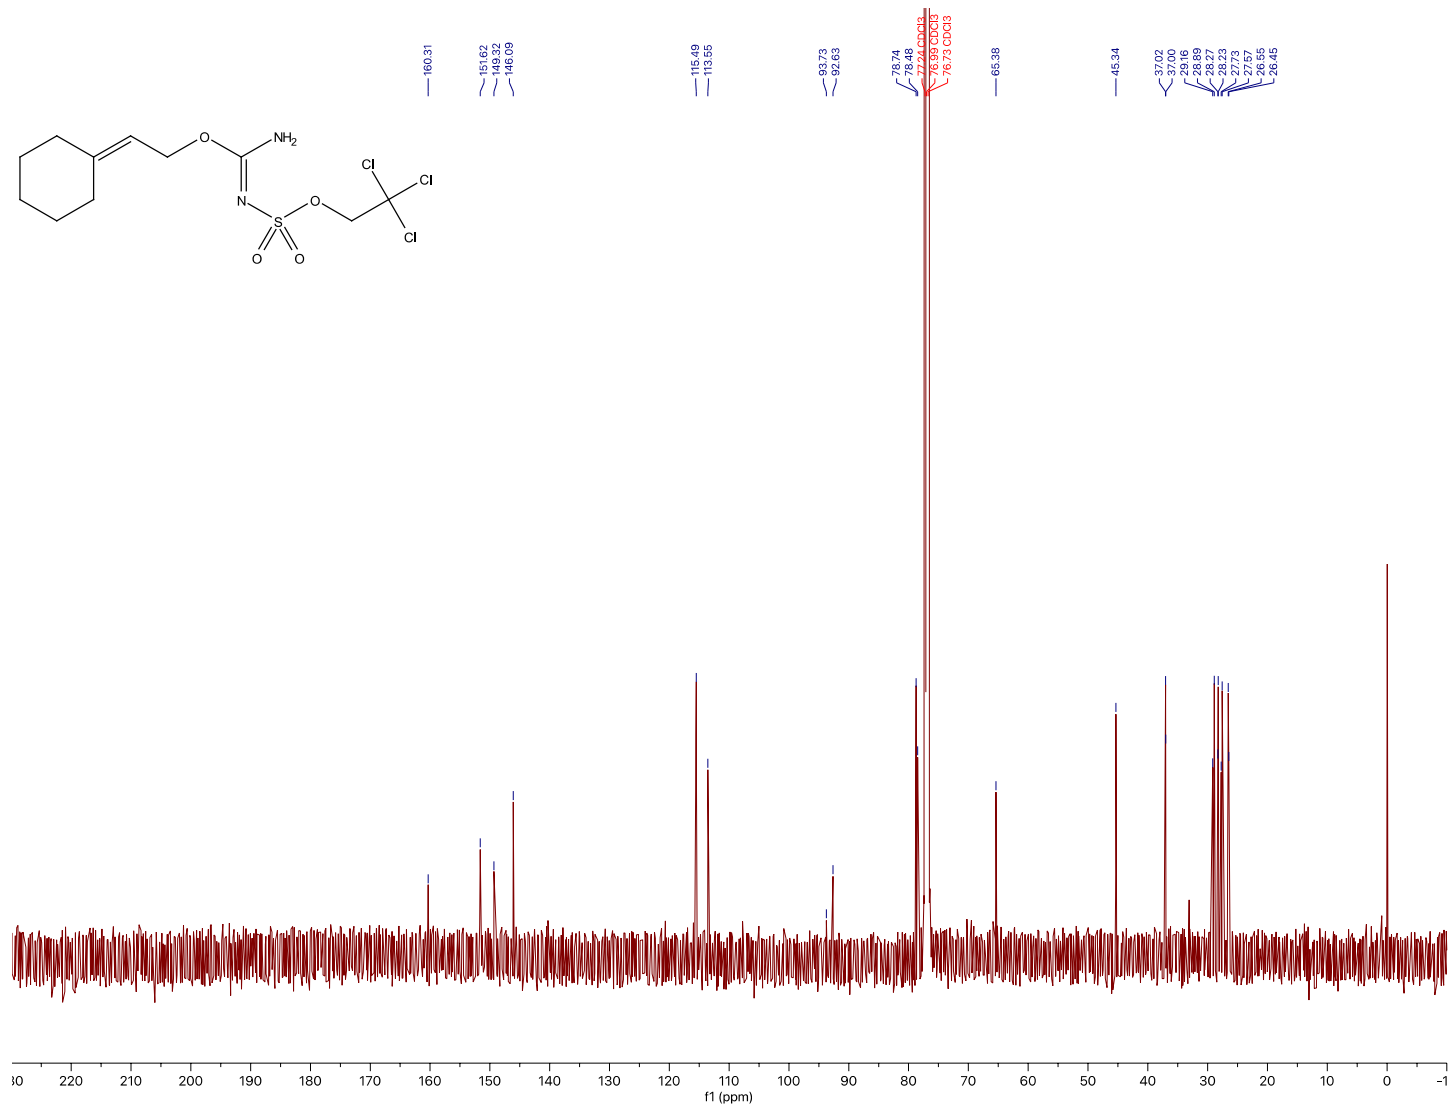

<sup>1</sup>H NMR (500 MHz, CDCl<sub>3</sub>) for Compound 1y

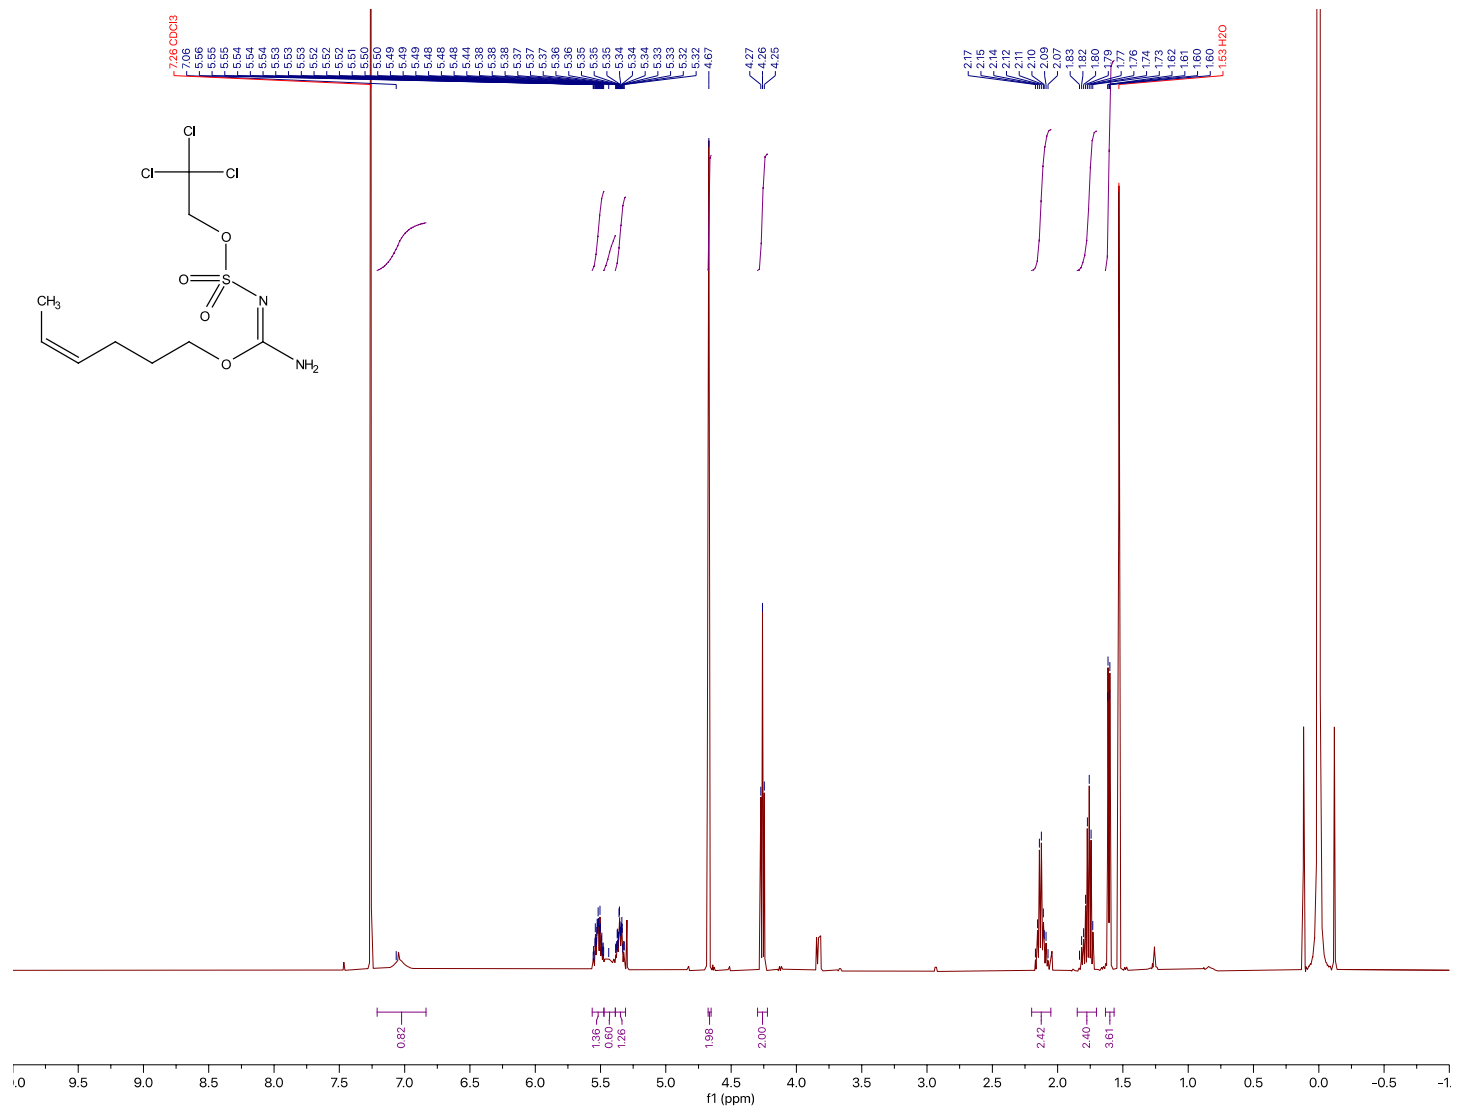

$^{13}\text{C}$  NMR (126 MHz,  $\text{CDCl}_3$ ) for **Compound 1y**

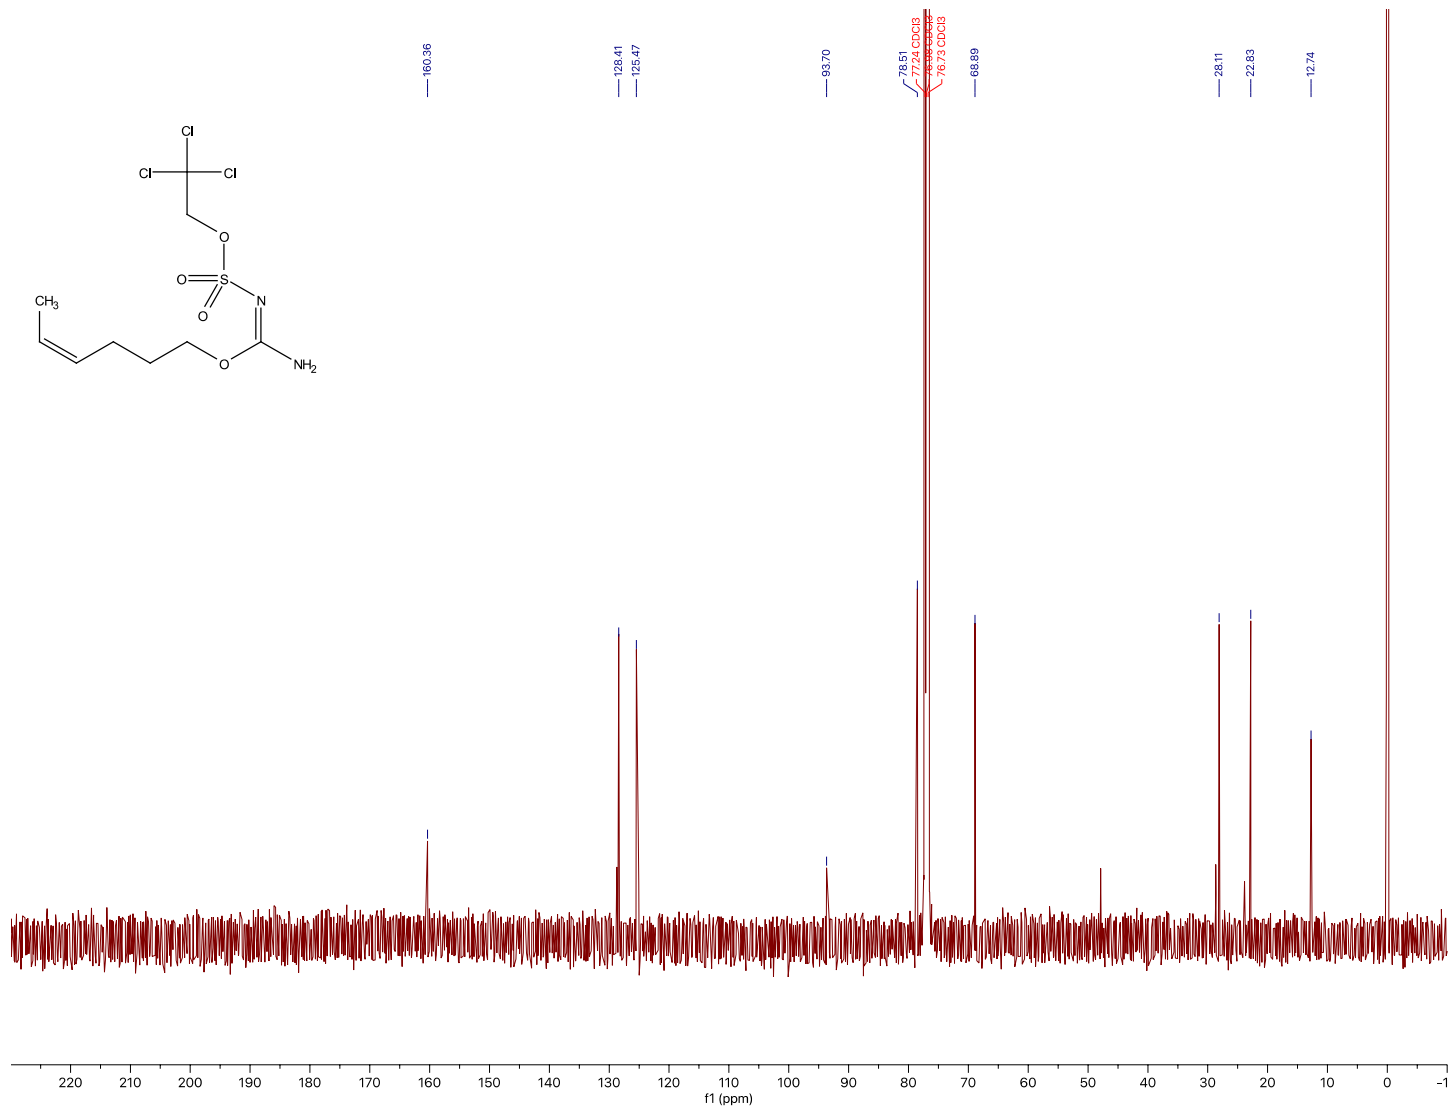

<sup>1</sup>H NMR (500 MHz, CDCl<sub>3</sub>) for **Compound 1z**

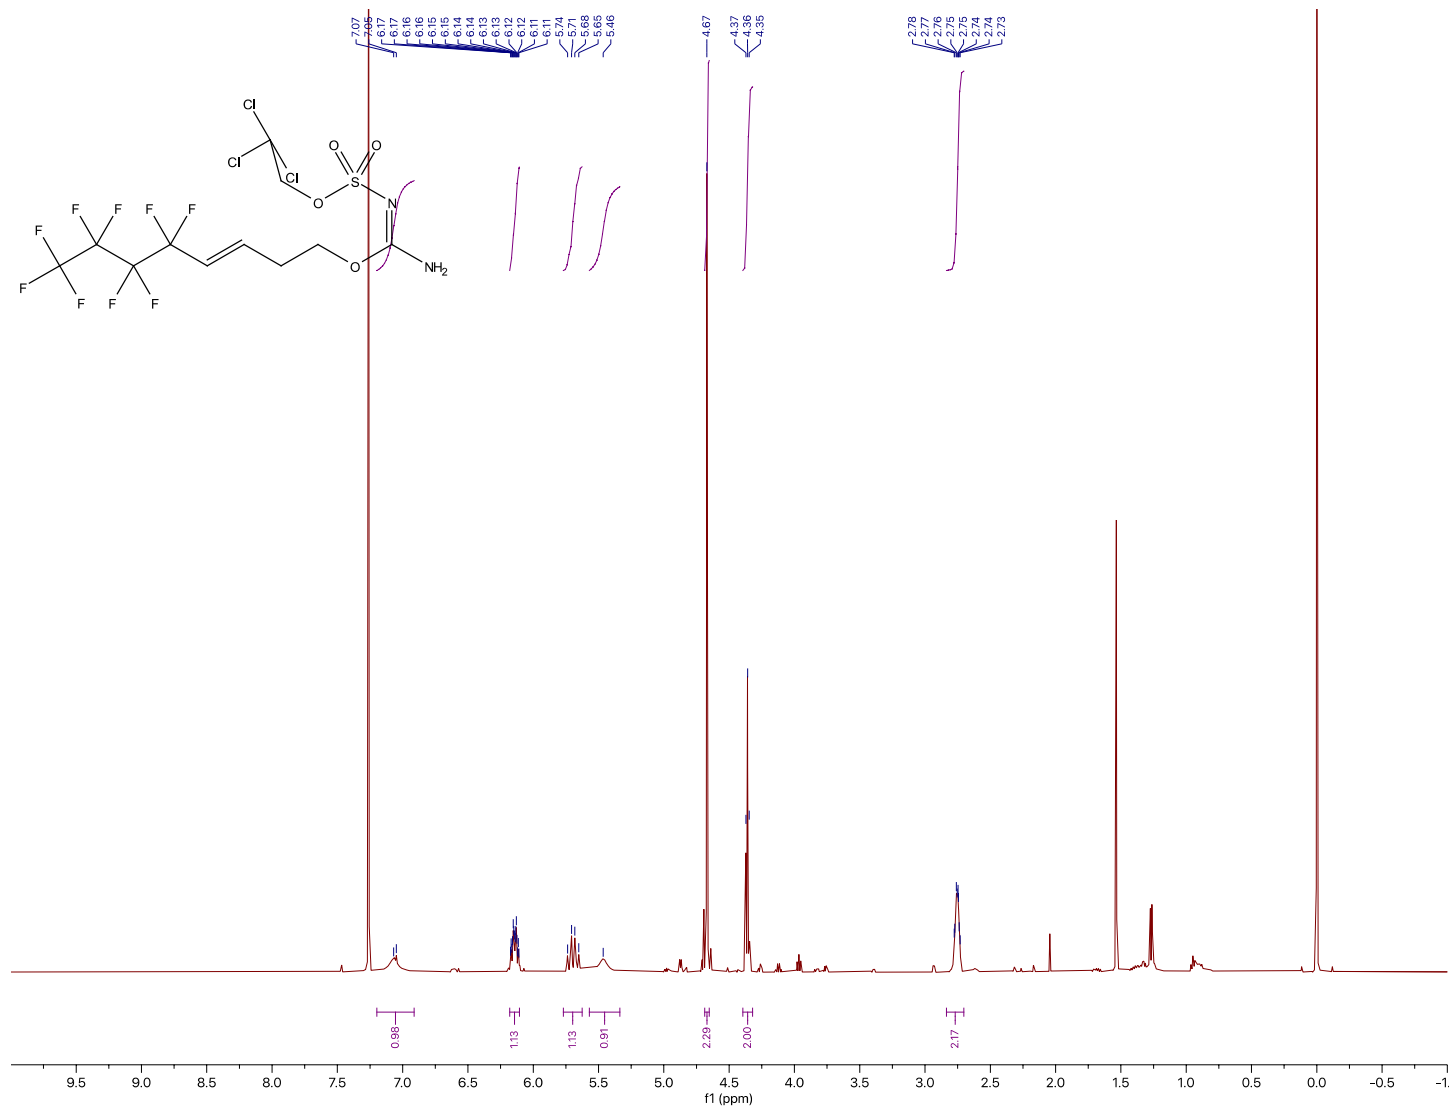

$^{13}\text{C}$  NMR (126 MHz,  $\text{CDCl}_3$ ) for **Compound 1z**

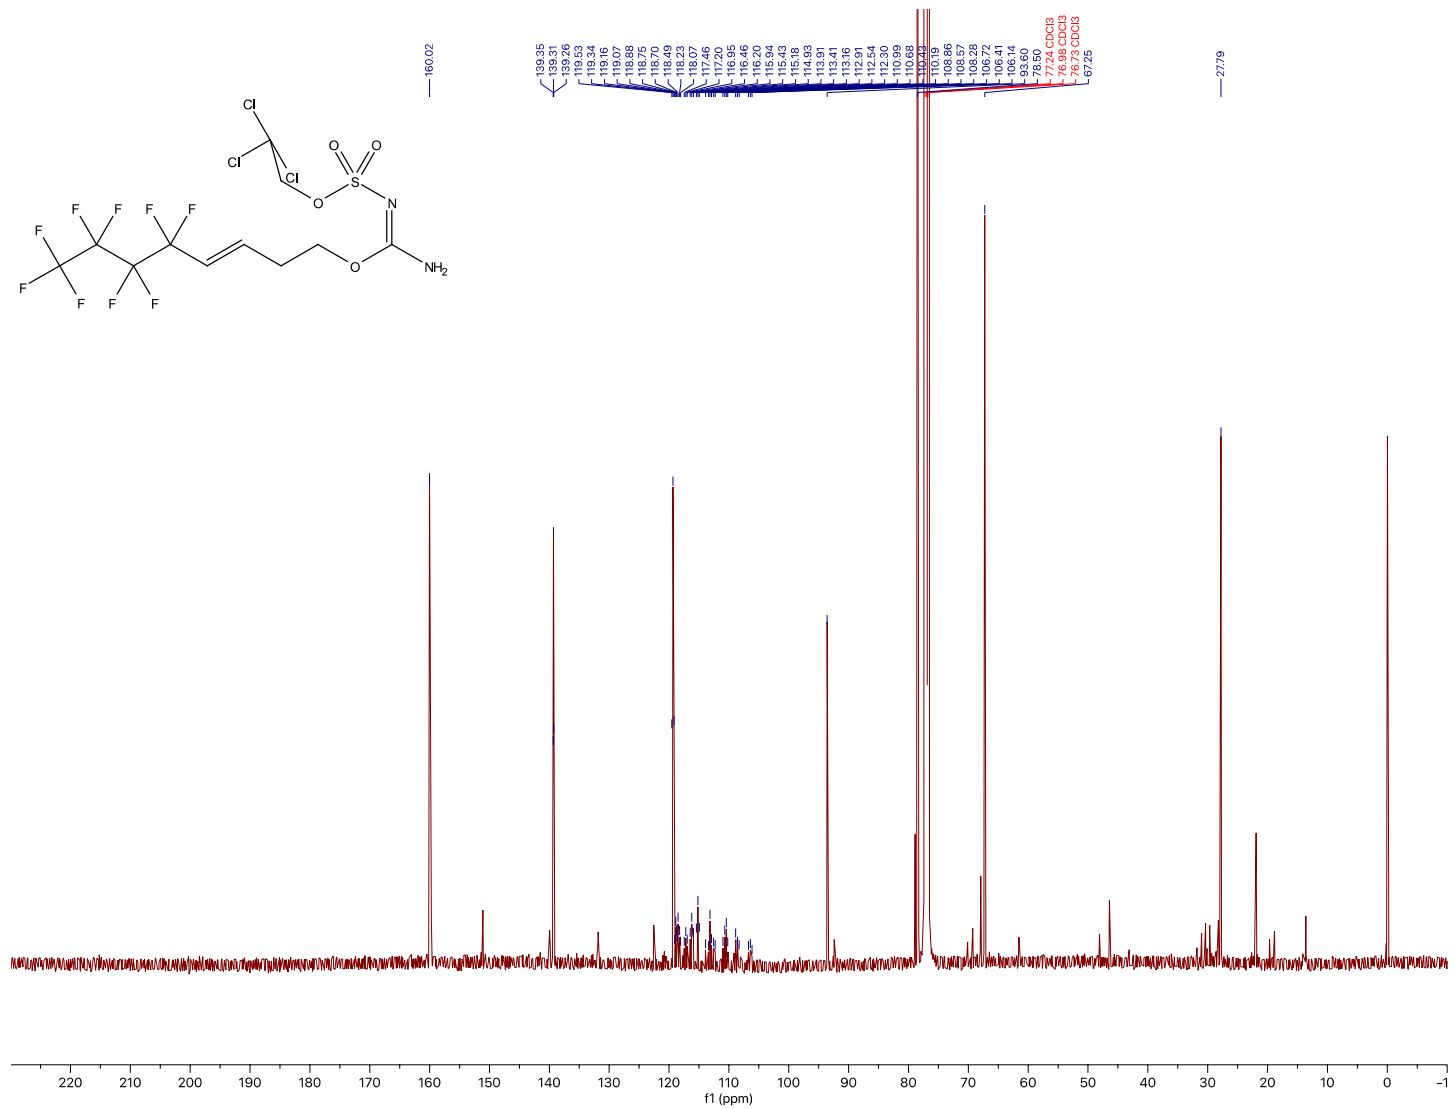

<sup>19</sup>F NMR (377 MHz, CDCl<sub>3</sub>) for **Compound 1z**

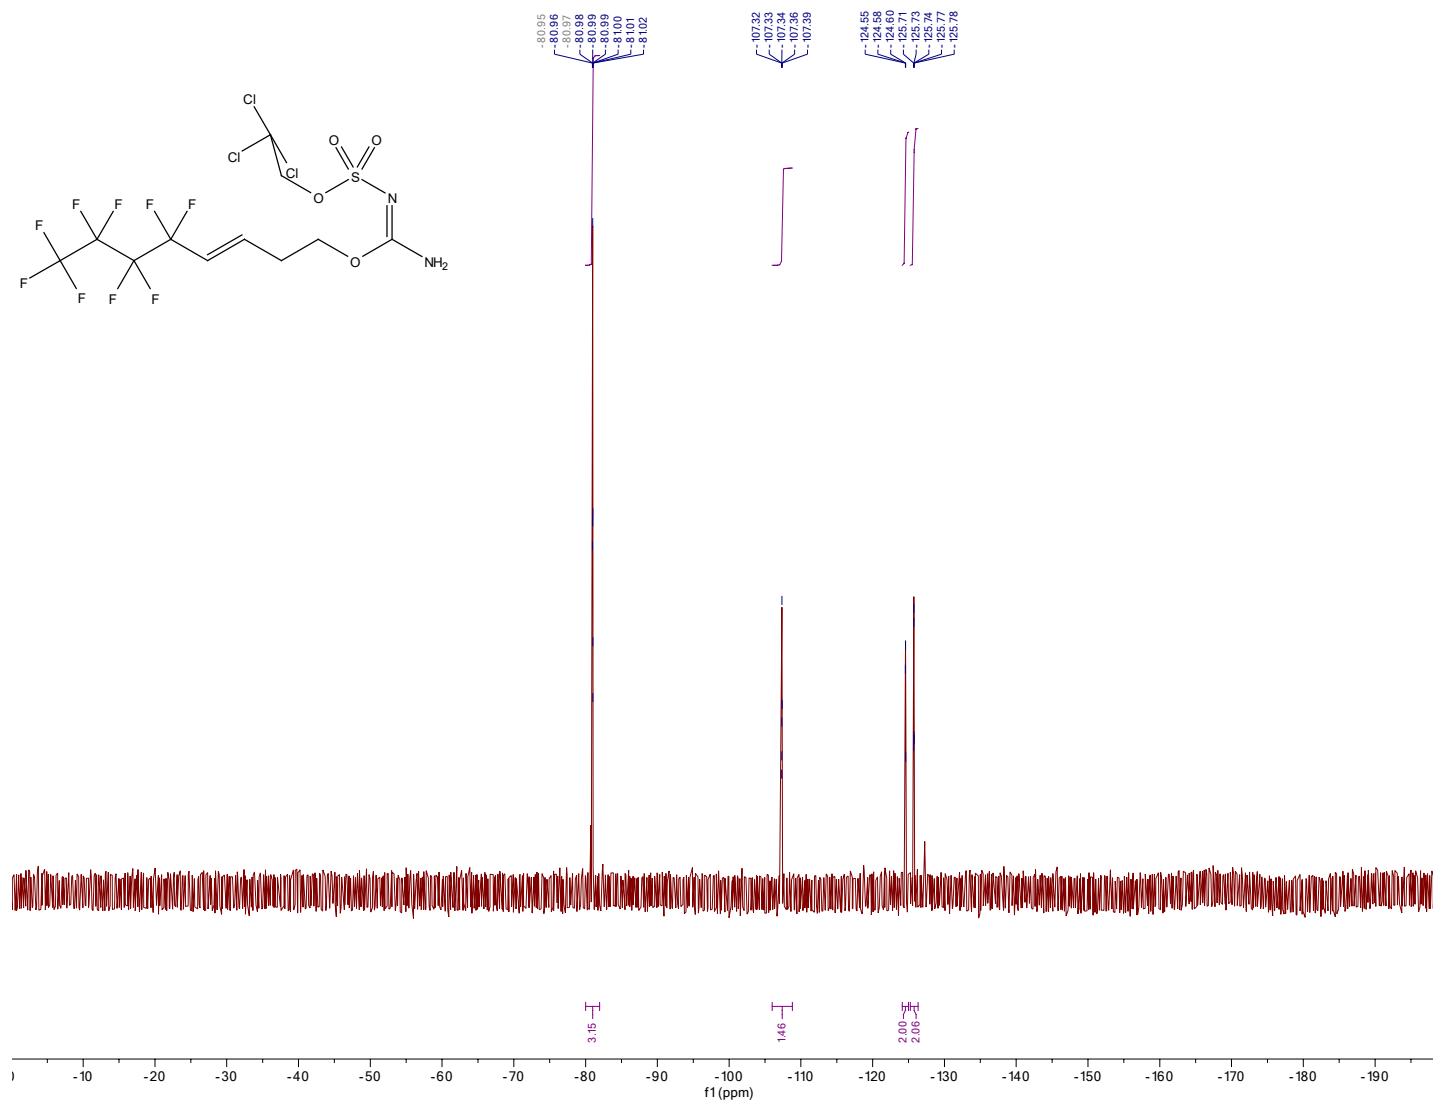

<sup>1</sup>H NMR (500 MHz, CDCl<sub>3</sub>) for Compound 2a

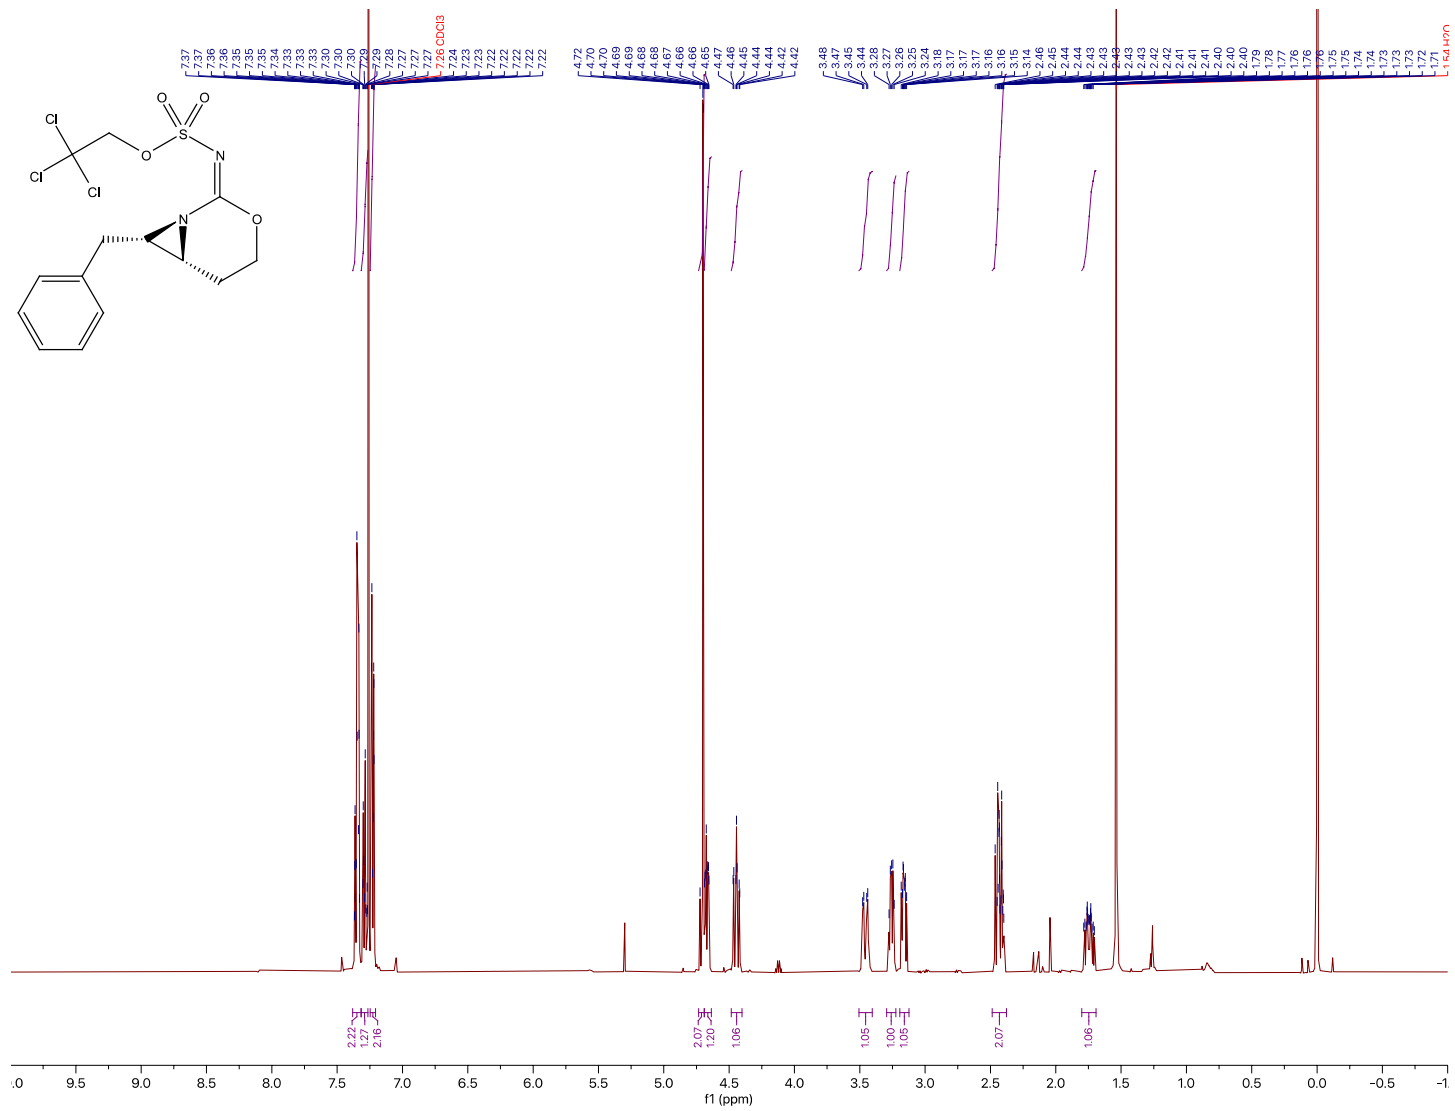

$^{13}\text{C}$  NMR (126 MHz,  $\text{CDCl}_3$ ) for **Compound 2a**

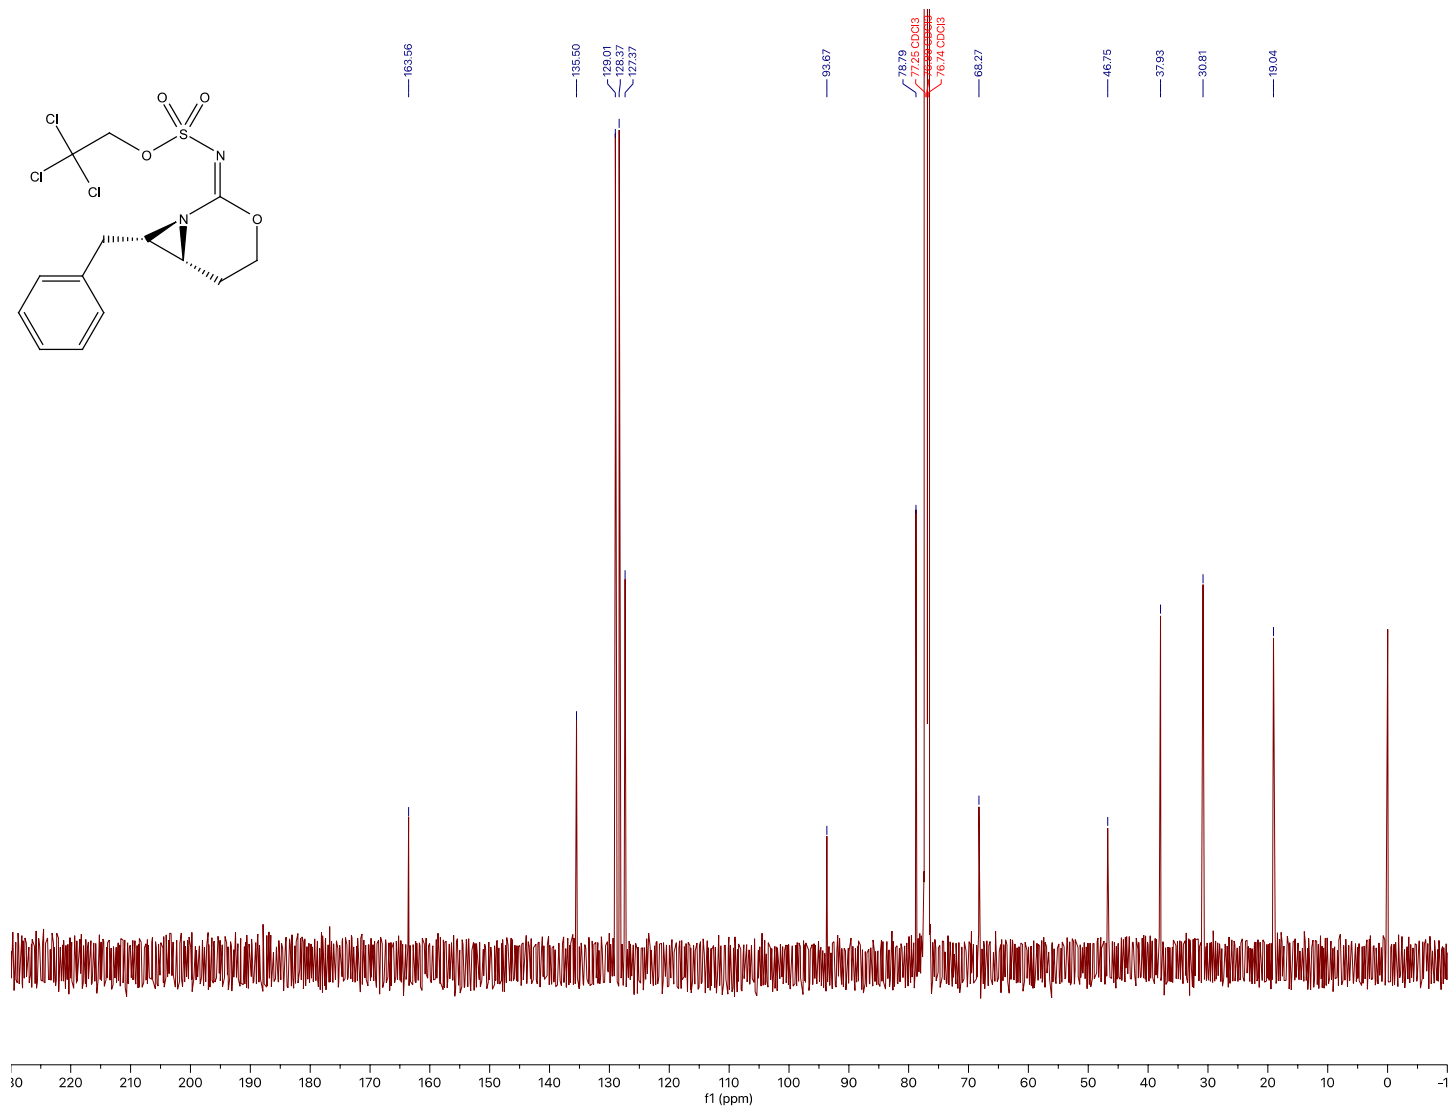



<sup>1</sup>H NMR (500 MHz, CDCl<sub>3</sub>) for **Compound 2b**

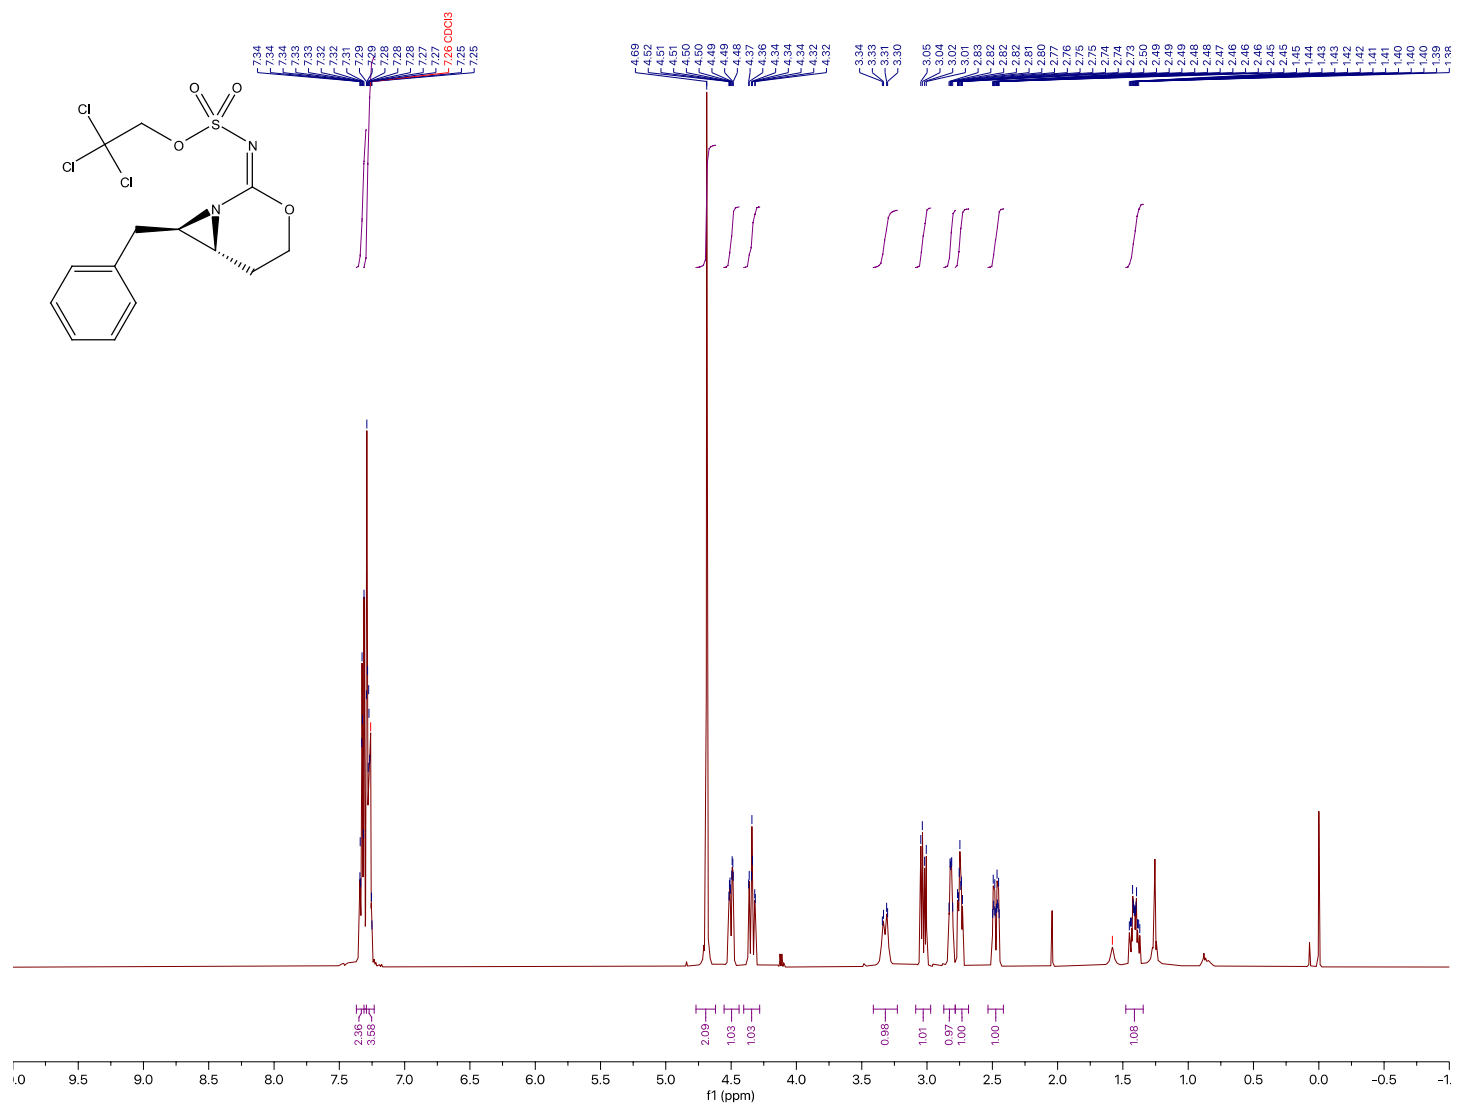

$^{13}\text{C}$  NMR (126 MHz,  $\text{CDCl}_3$ ) for **Compound 2b**

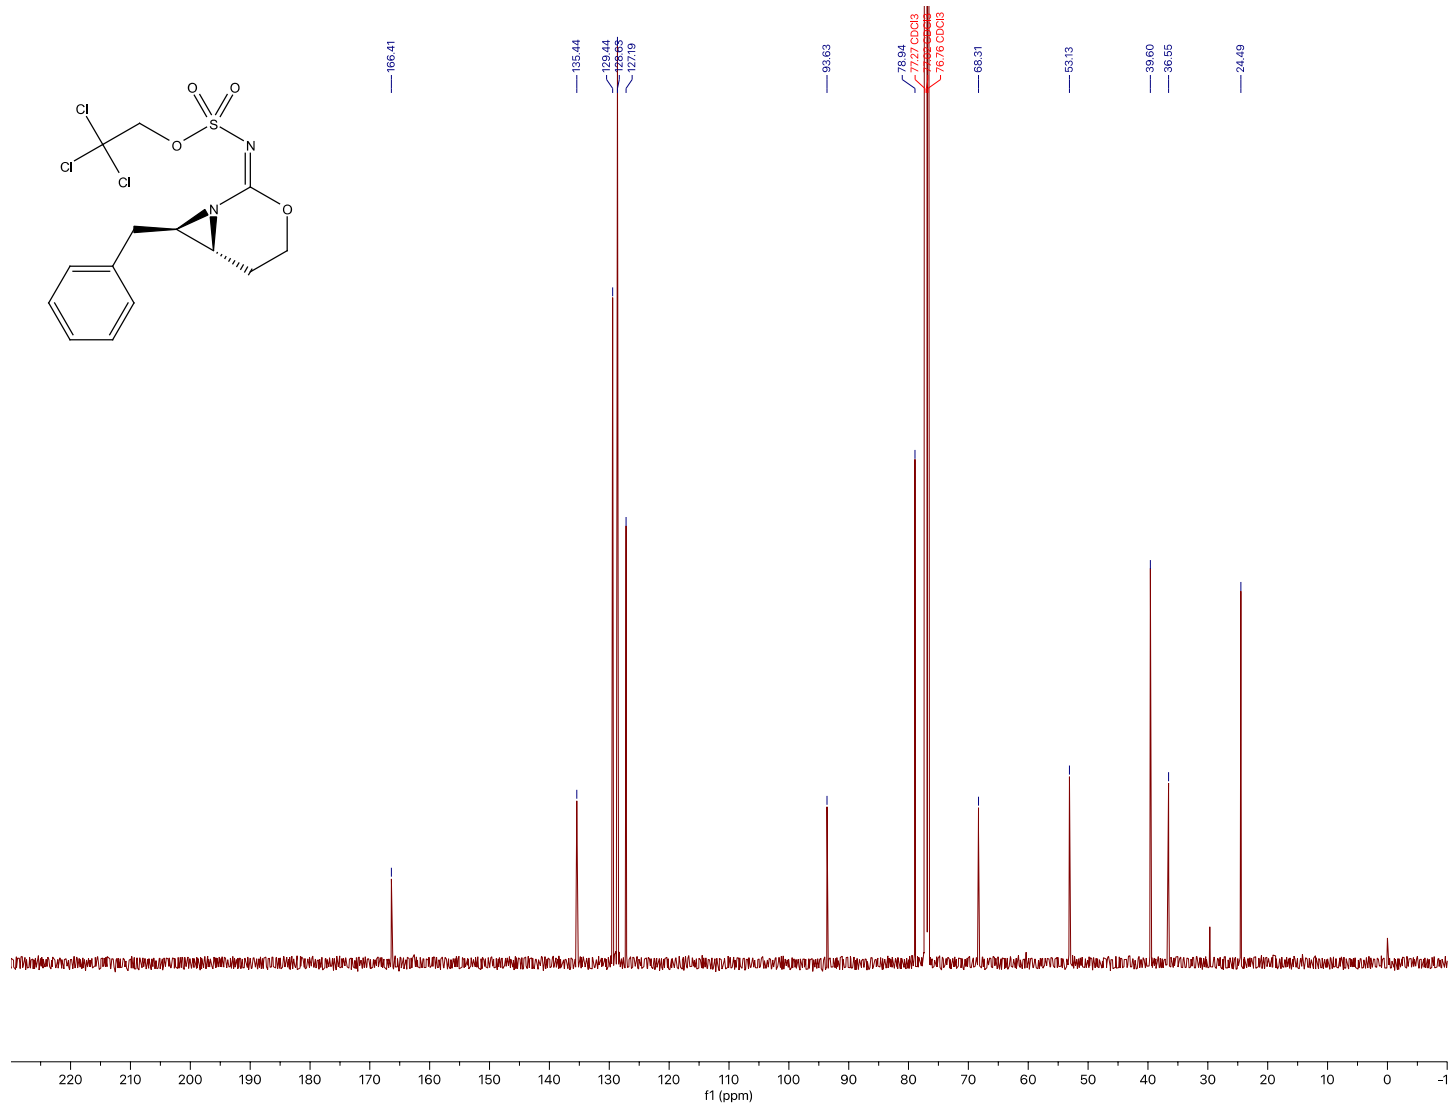

<sup>1</sup>H NMR (500 MHz, CDCl<sub>3</sub>) for **Compound 2c**

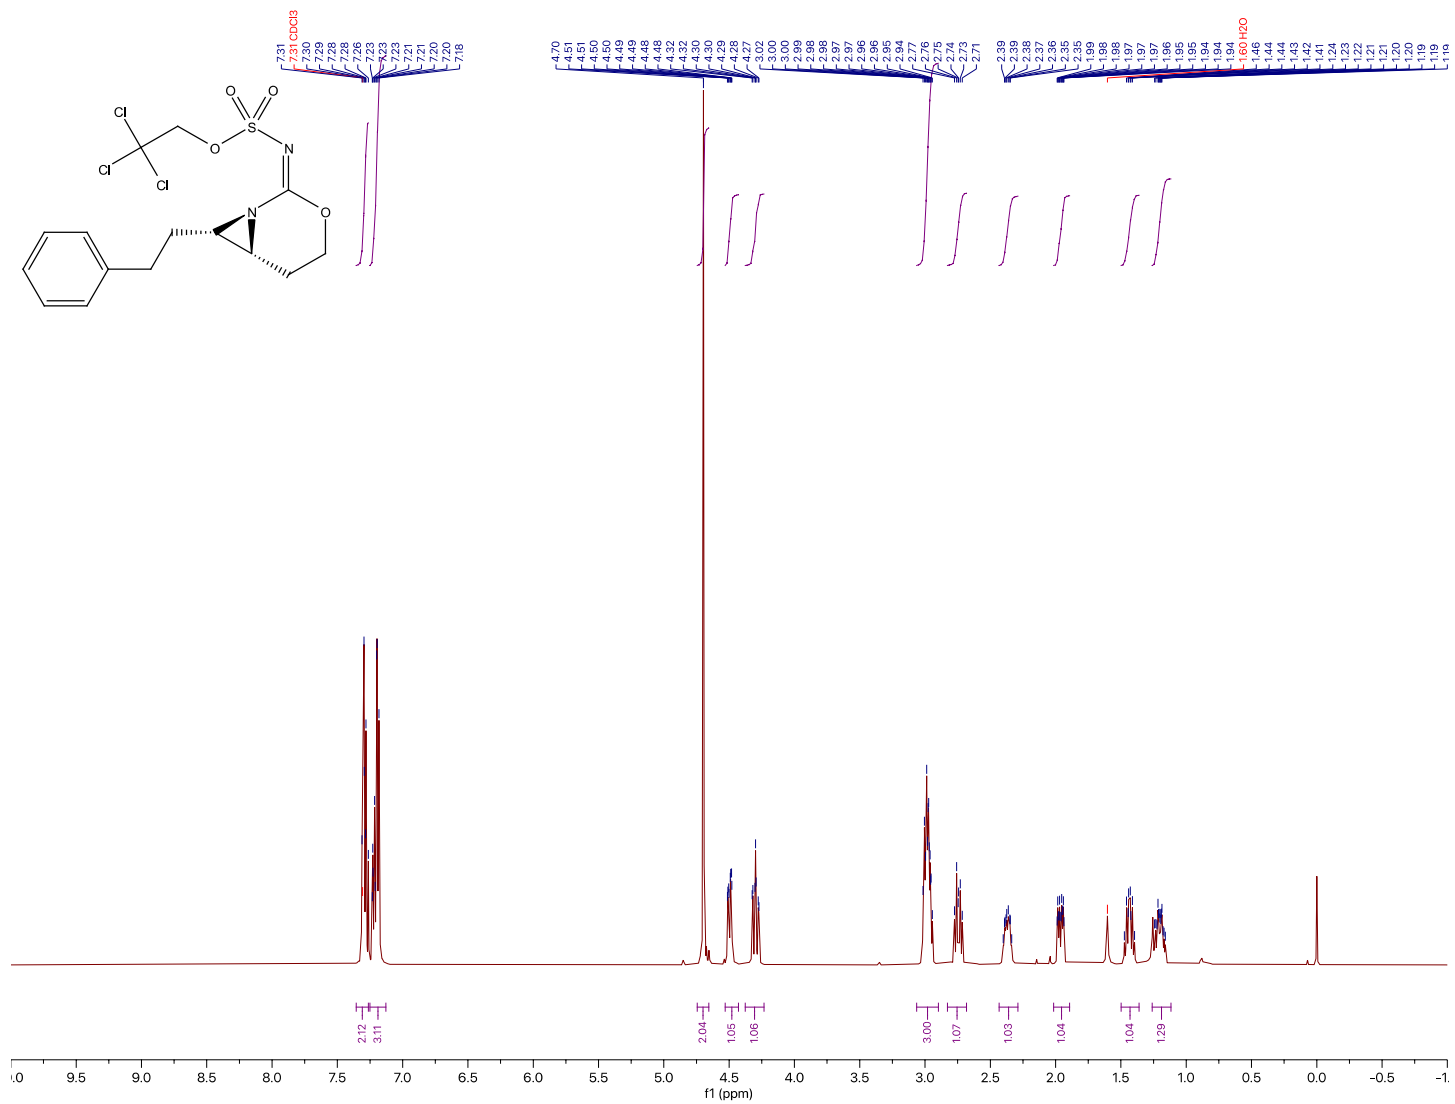

$^{13}\text{C}$  NMR (126 MHz,  $\text{CDCl}_3$ ) for **Compound 2c**

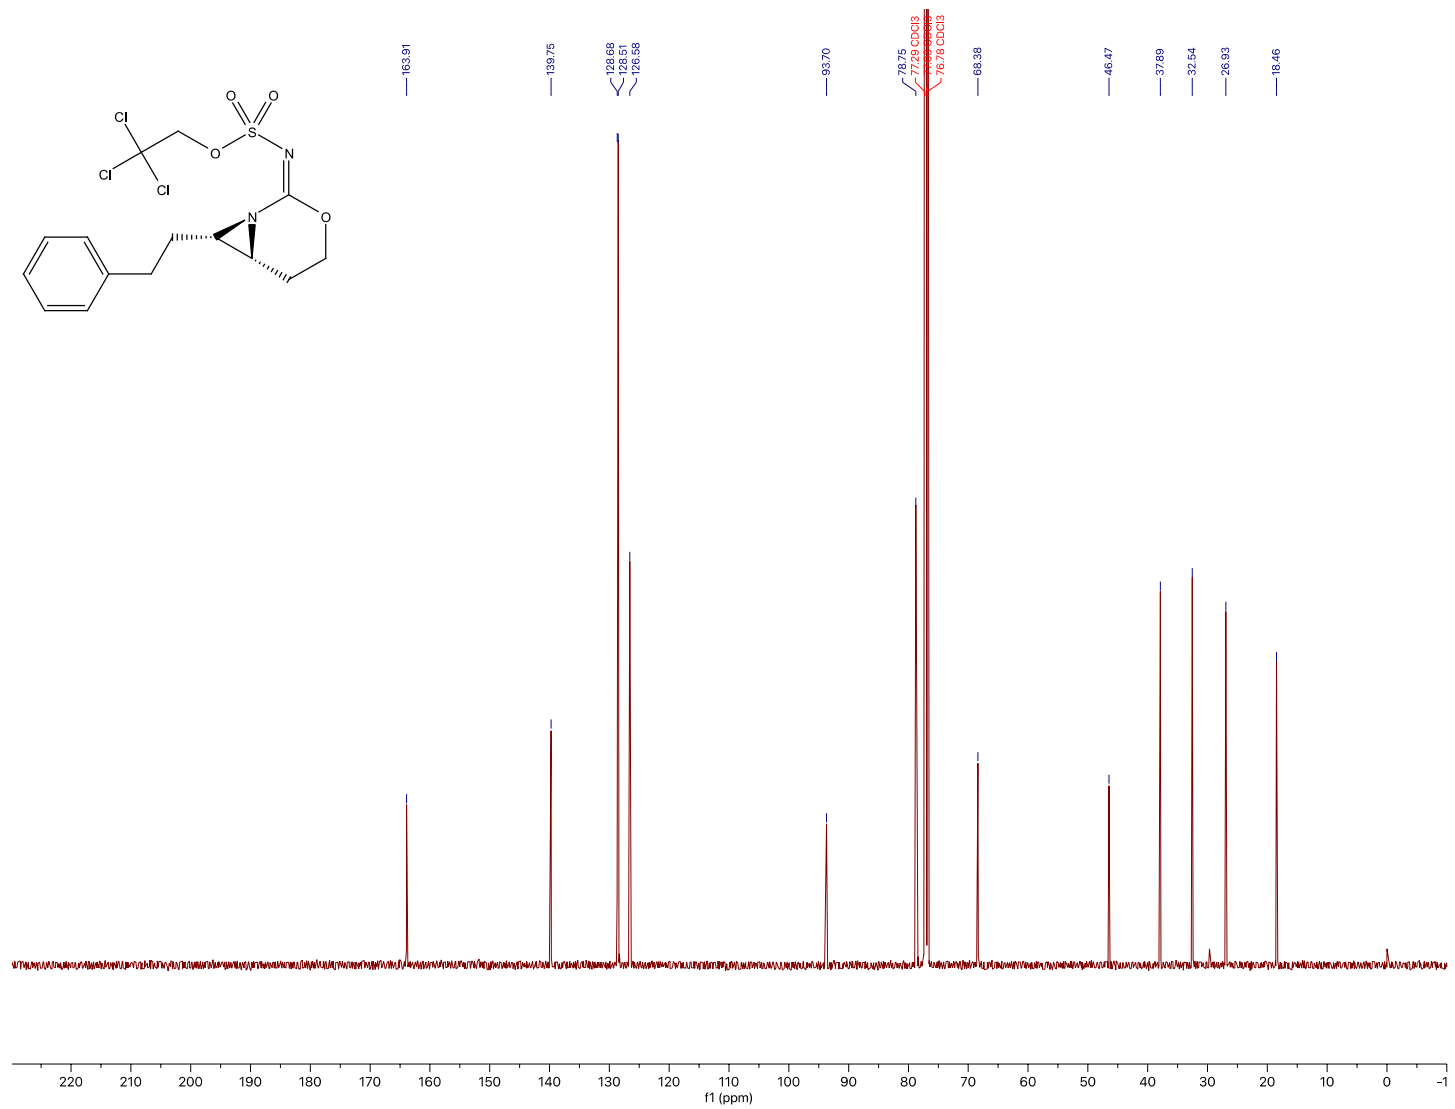

<sup>1</sup>H NMR (500 MHz, CDCl<sub>3</sub>) for Compound 2d

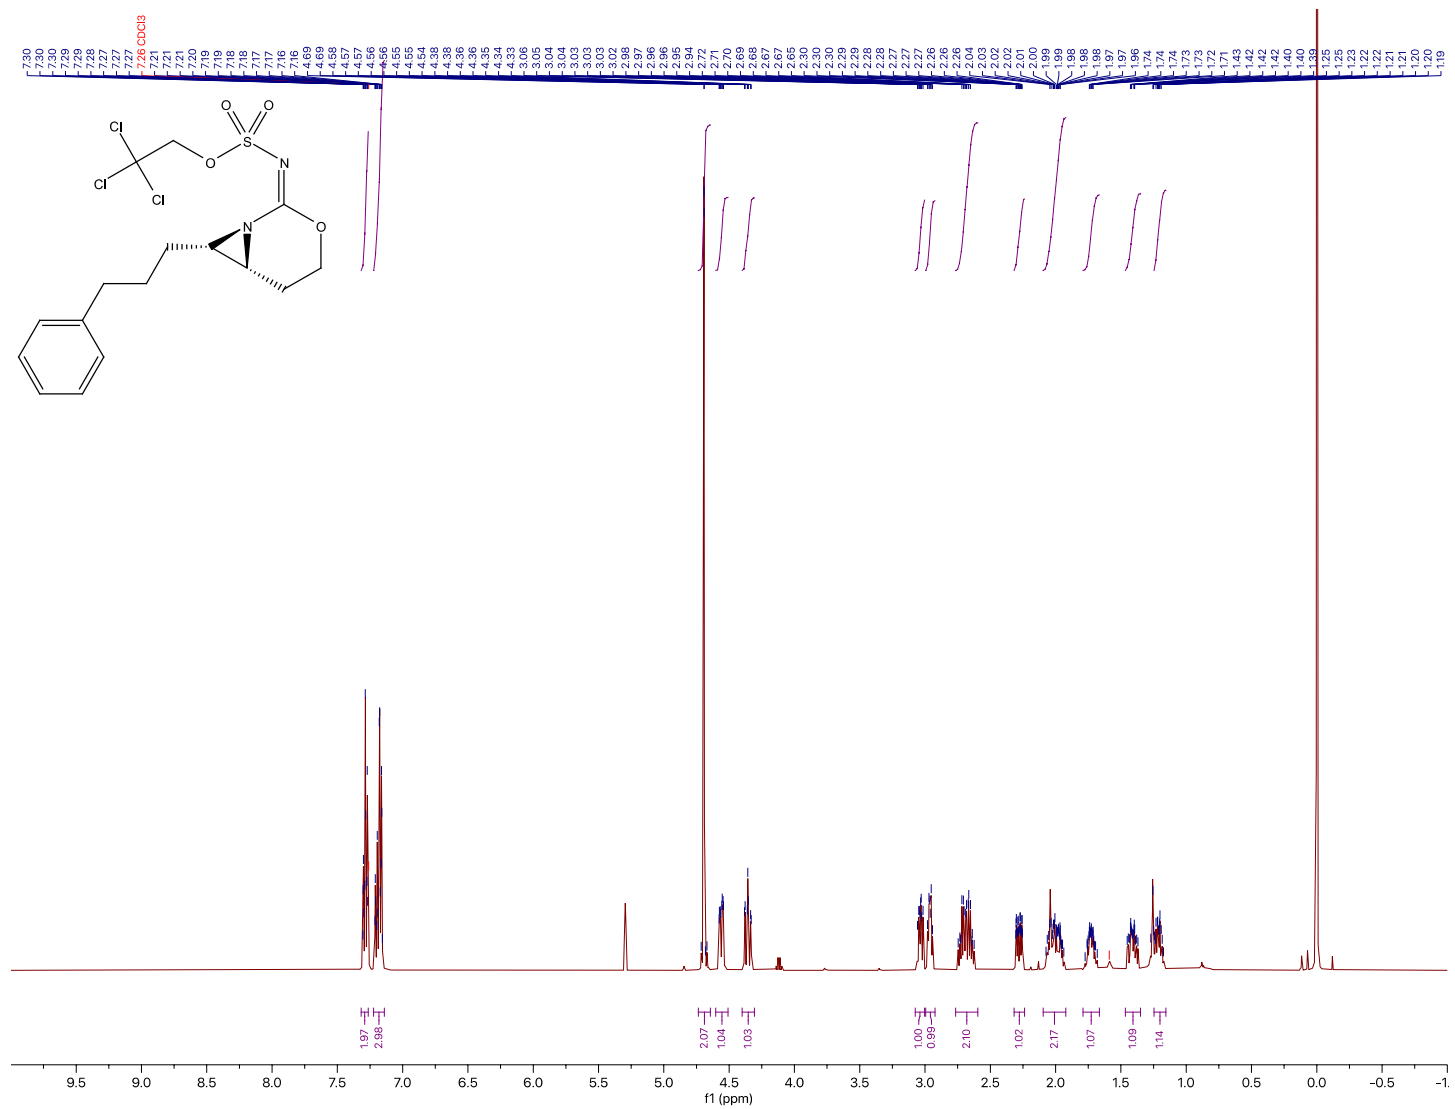

$^{13}\text{C}$  NMR (126 MHz,  $\text{CDCl}_3$ ) for **Compound 2d**

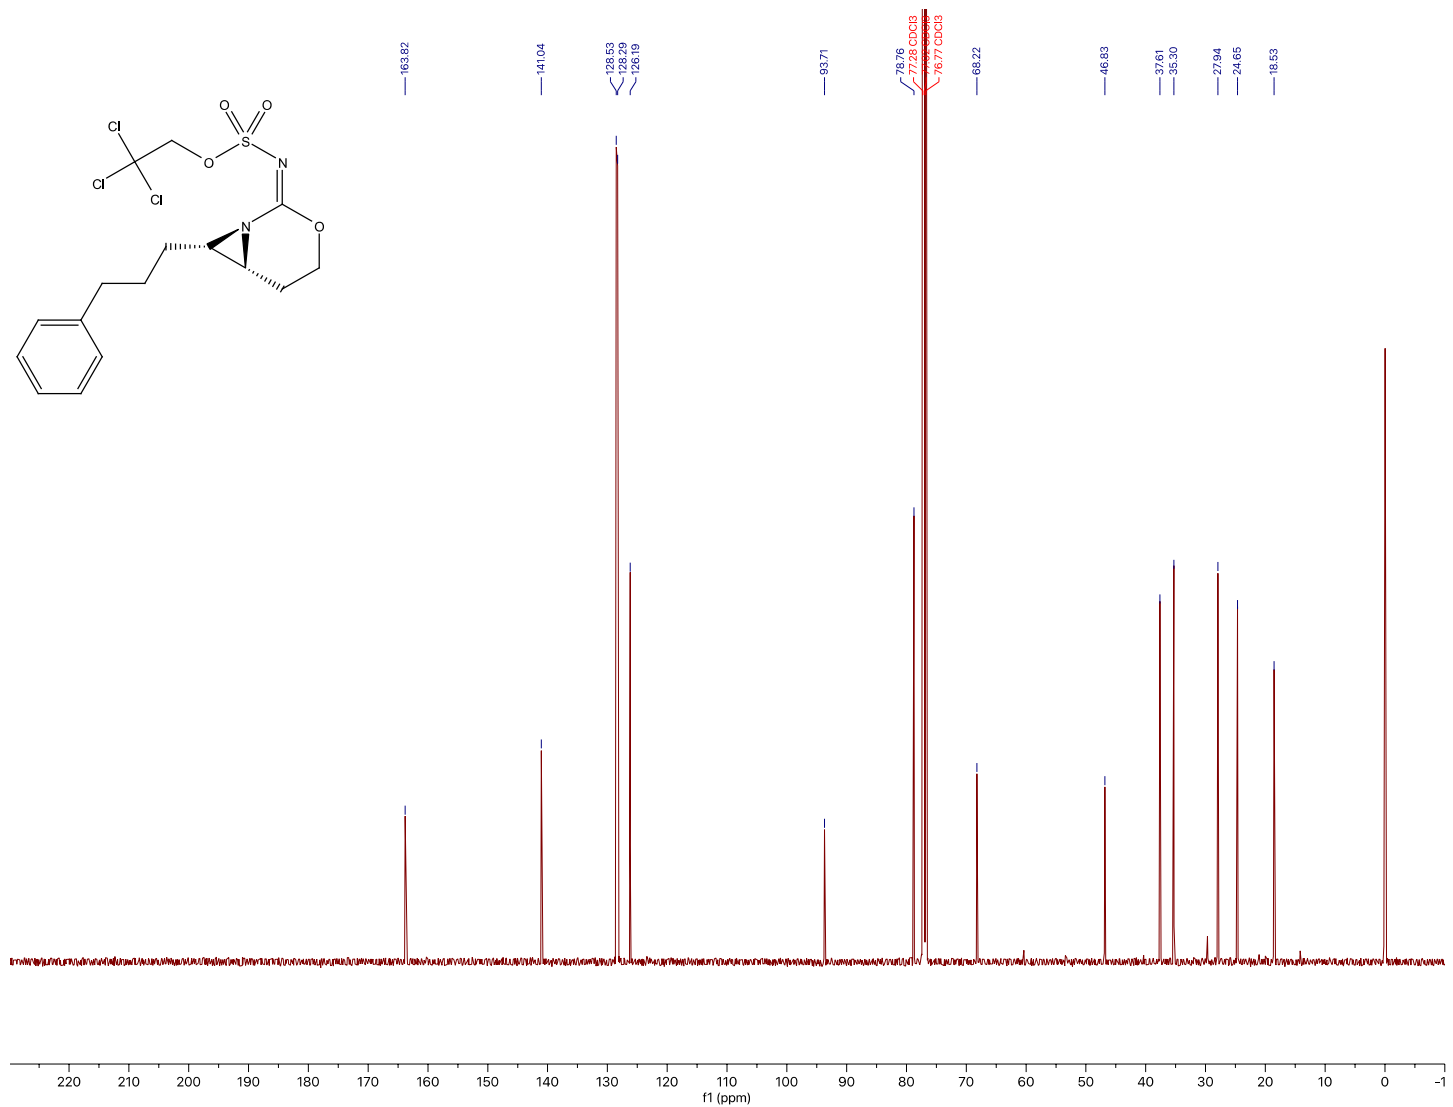



$^{13}\text{C}$  NMR (126 MHz,  $\text{CDCl}_3$ ) for **Compound 2e**

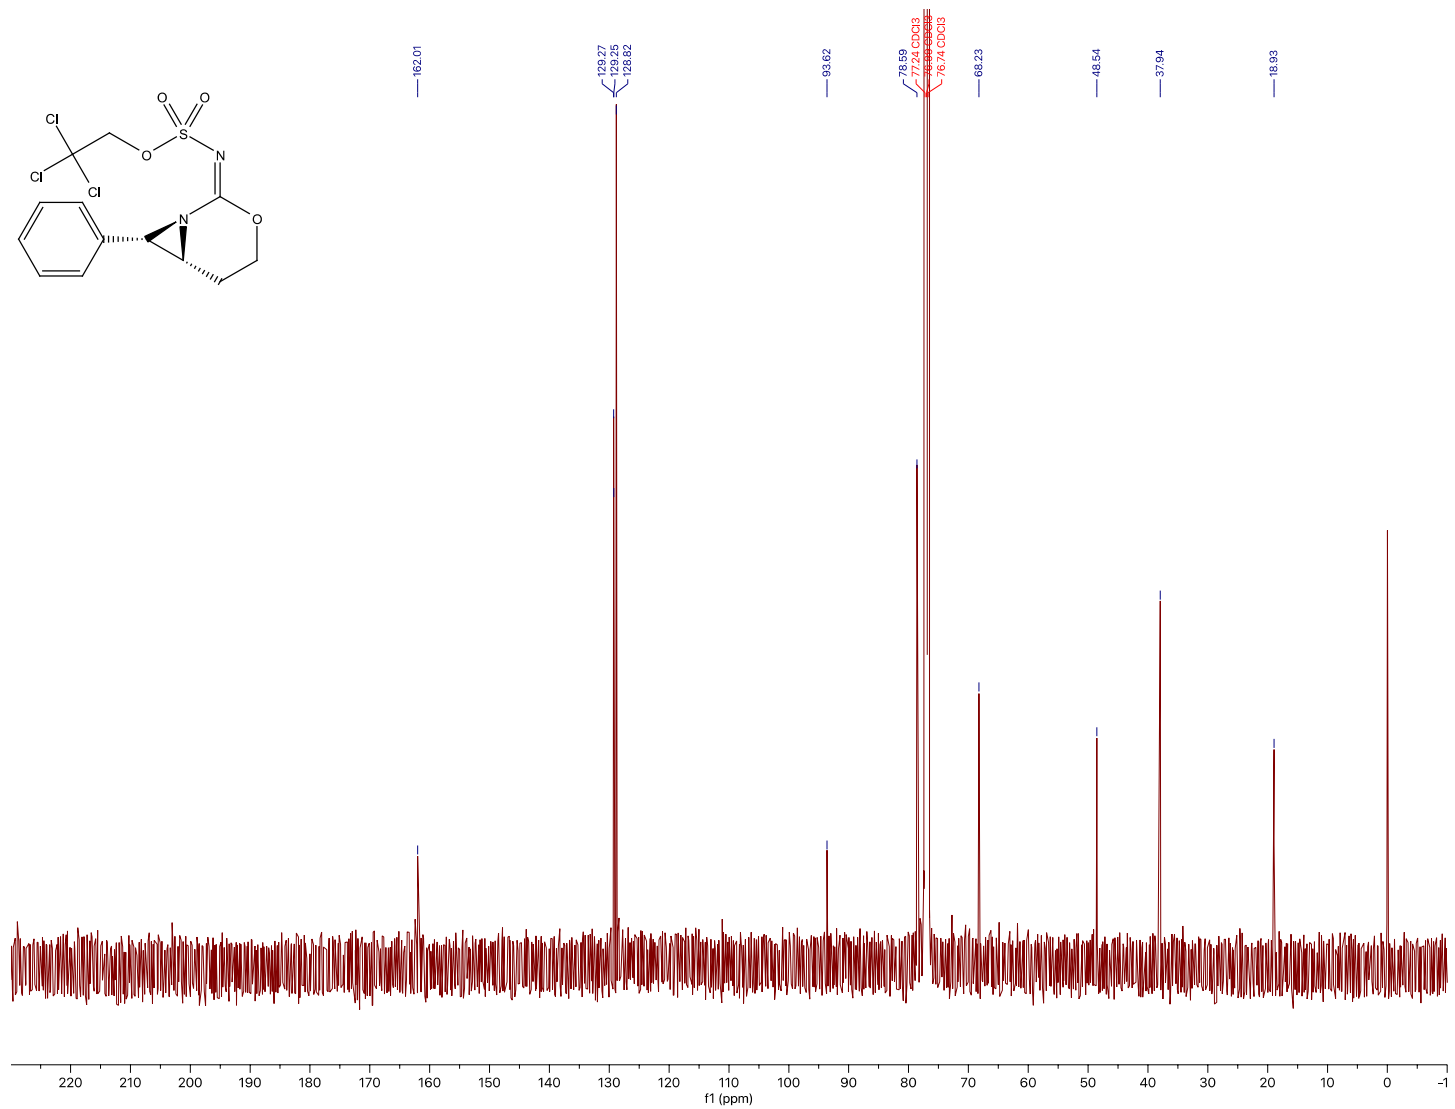



<sup>1</sup>H NMR (500 MHz, CDCl<sub>3</sub>) for Compound 2f

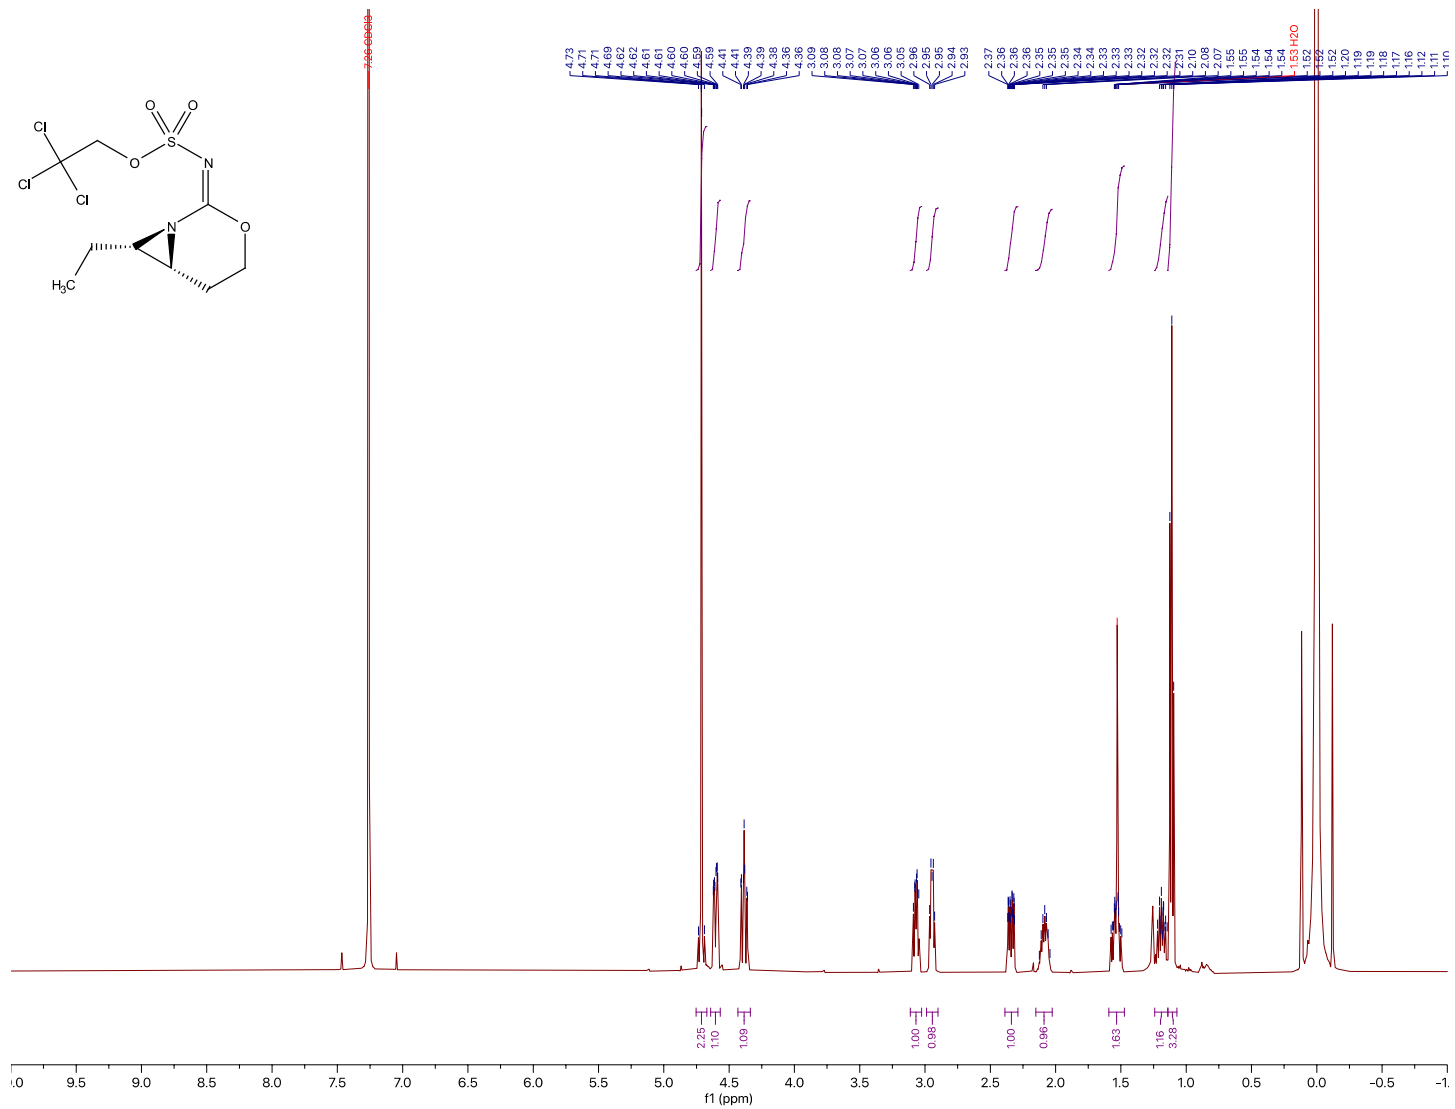

$^{13}\text{C}$  NMR (126 MHz,  $\text{CDCl}_3$ ) for **Compound 2f**

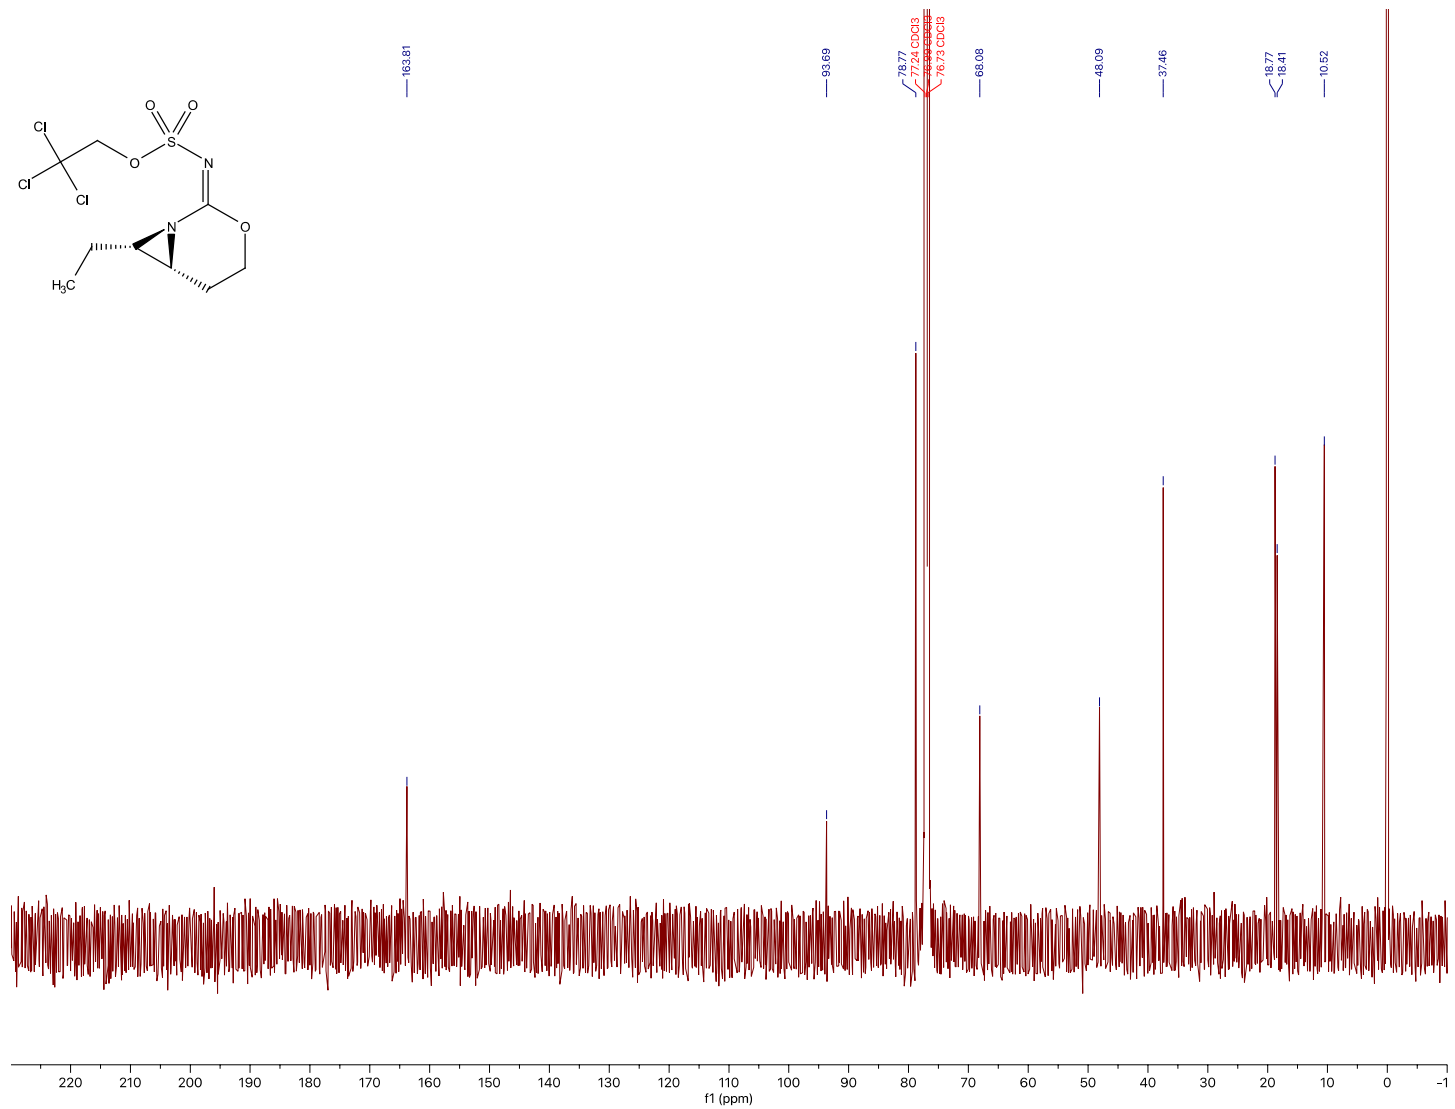

<sup>1</sup>H NMR (500 MHz, CDCl<sub>3</sub>) for Compound 2g

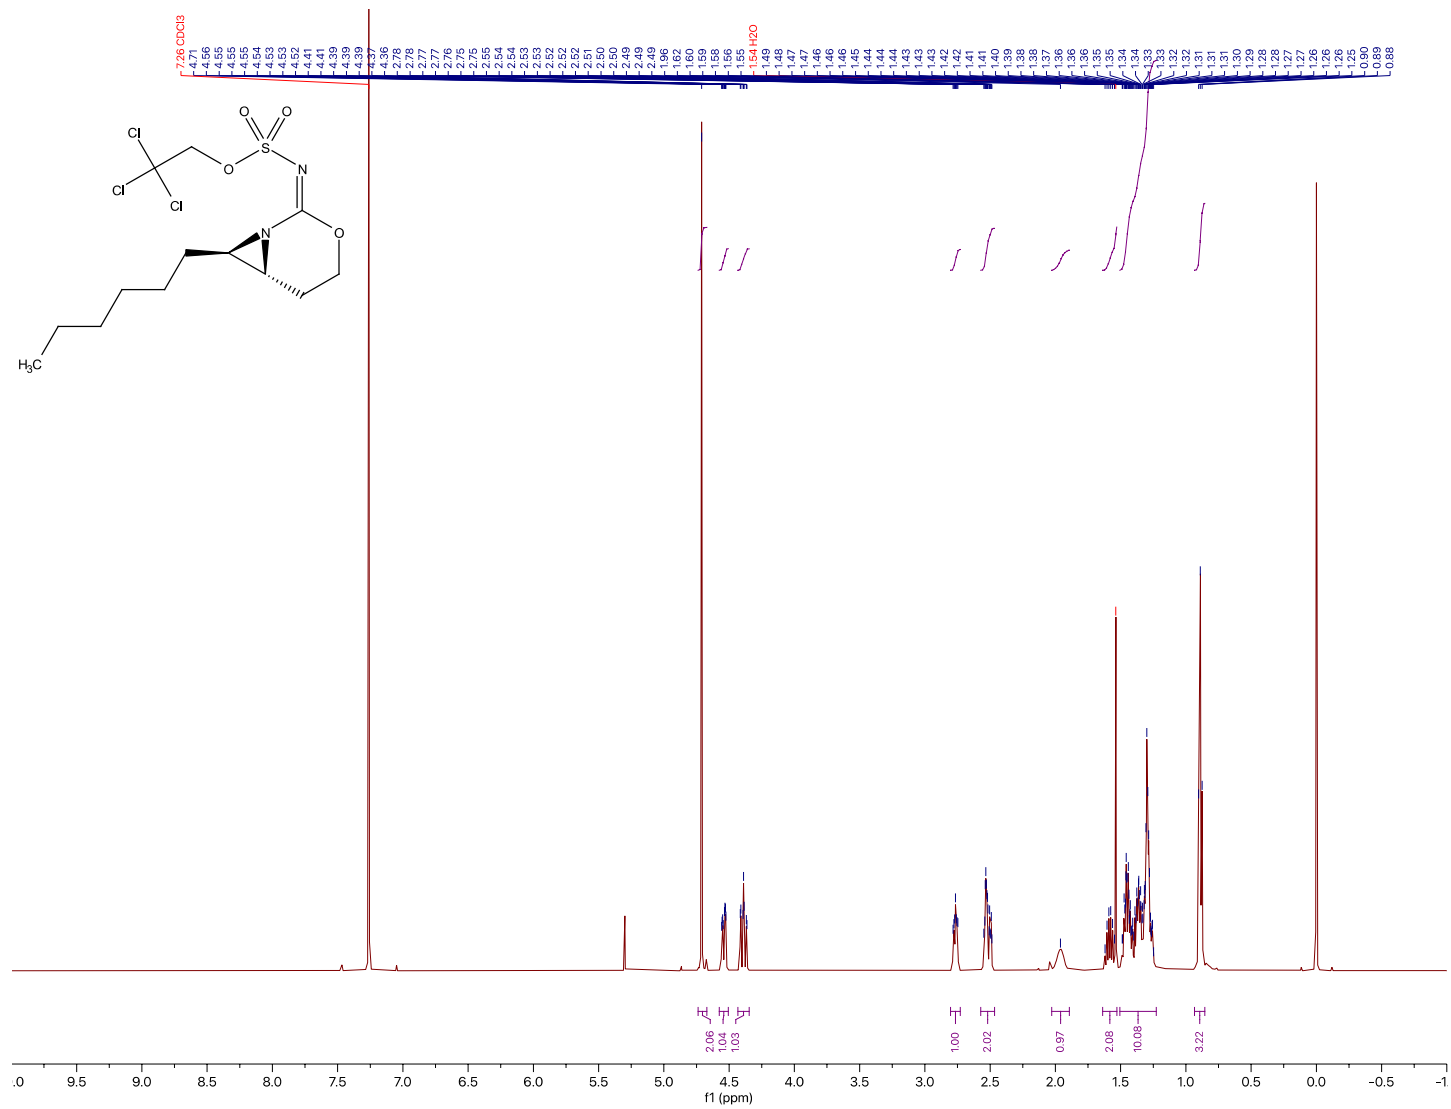

$^{13}\text{C}$  NMR (126 MHz,  $\text{CDCl}_3$ ) for **Compound 2g**

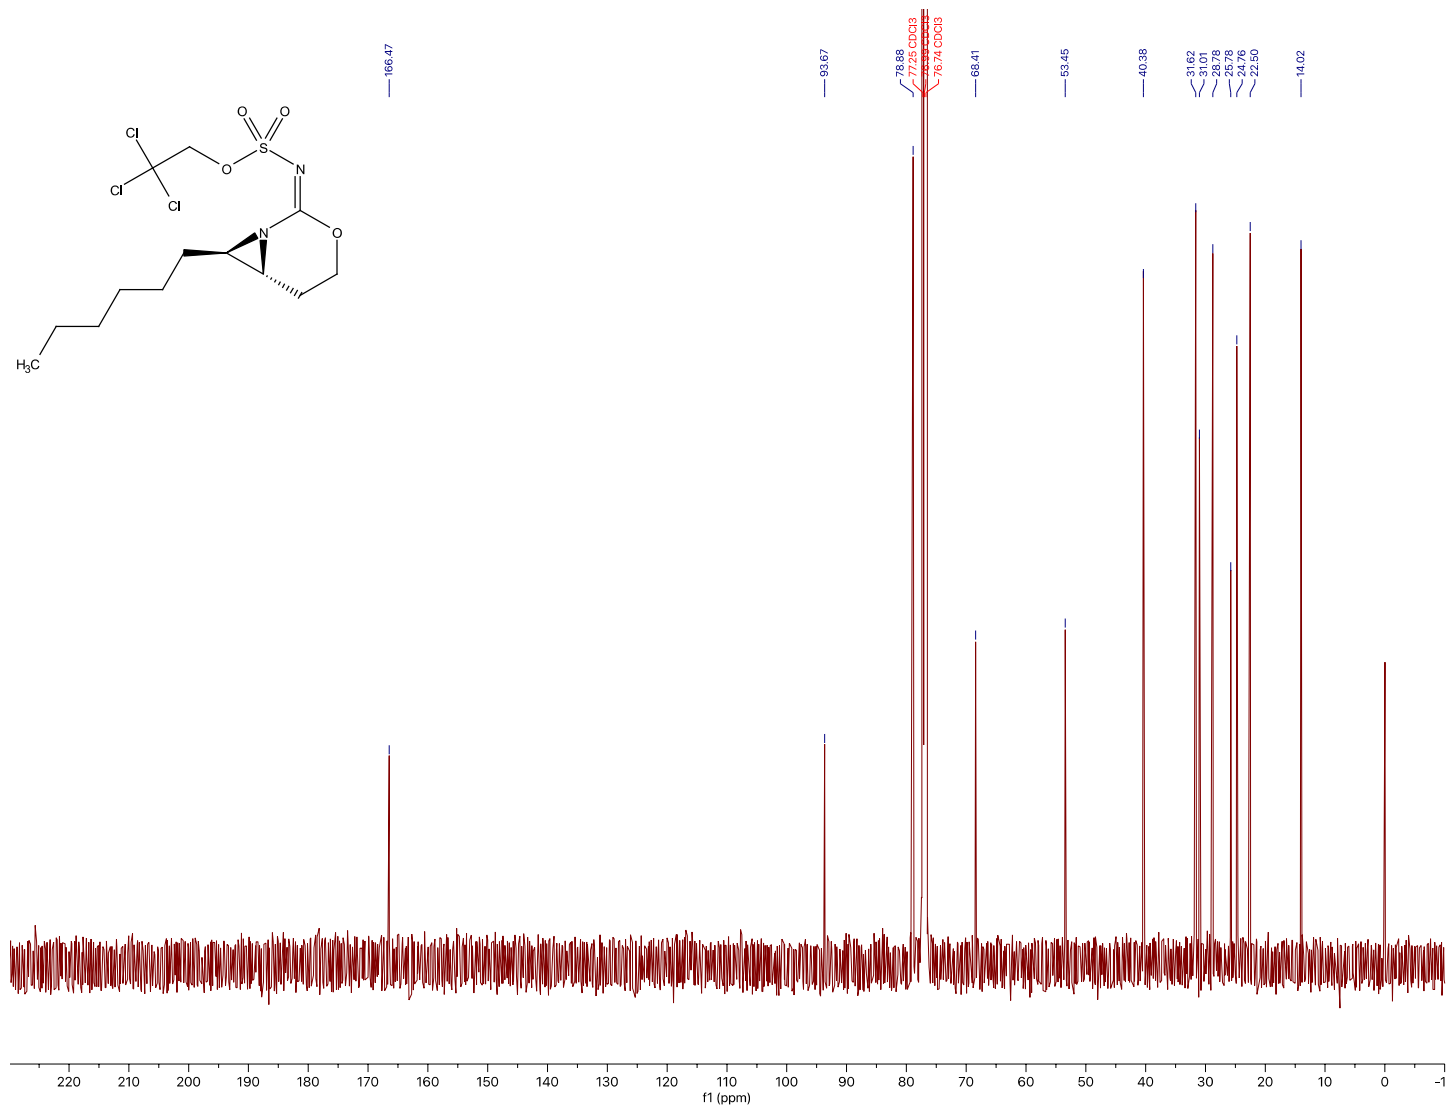



<sup>13</sup>C NMR (126 MHz, CDCl<sub>3</sub>) for **Compound 2h**

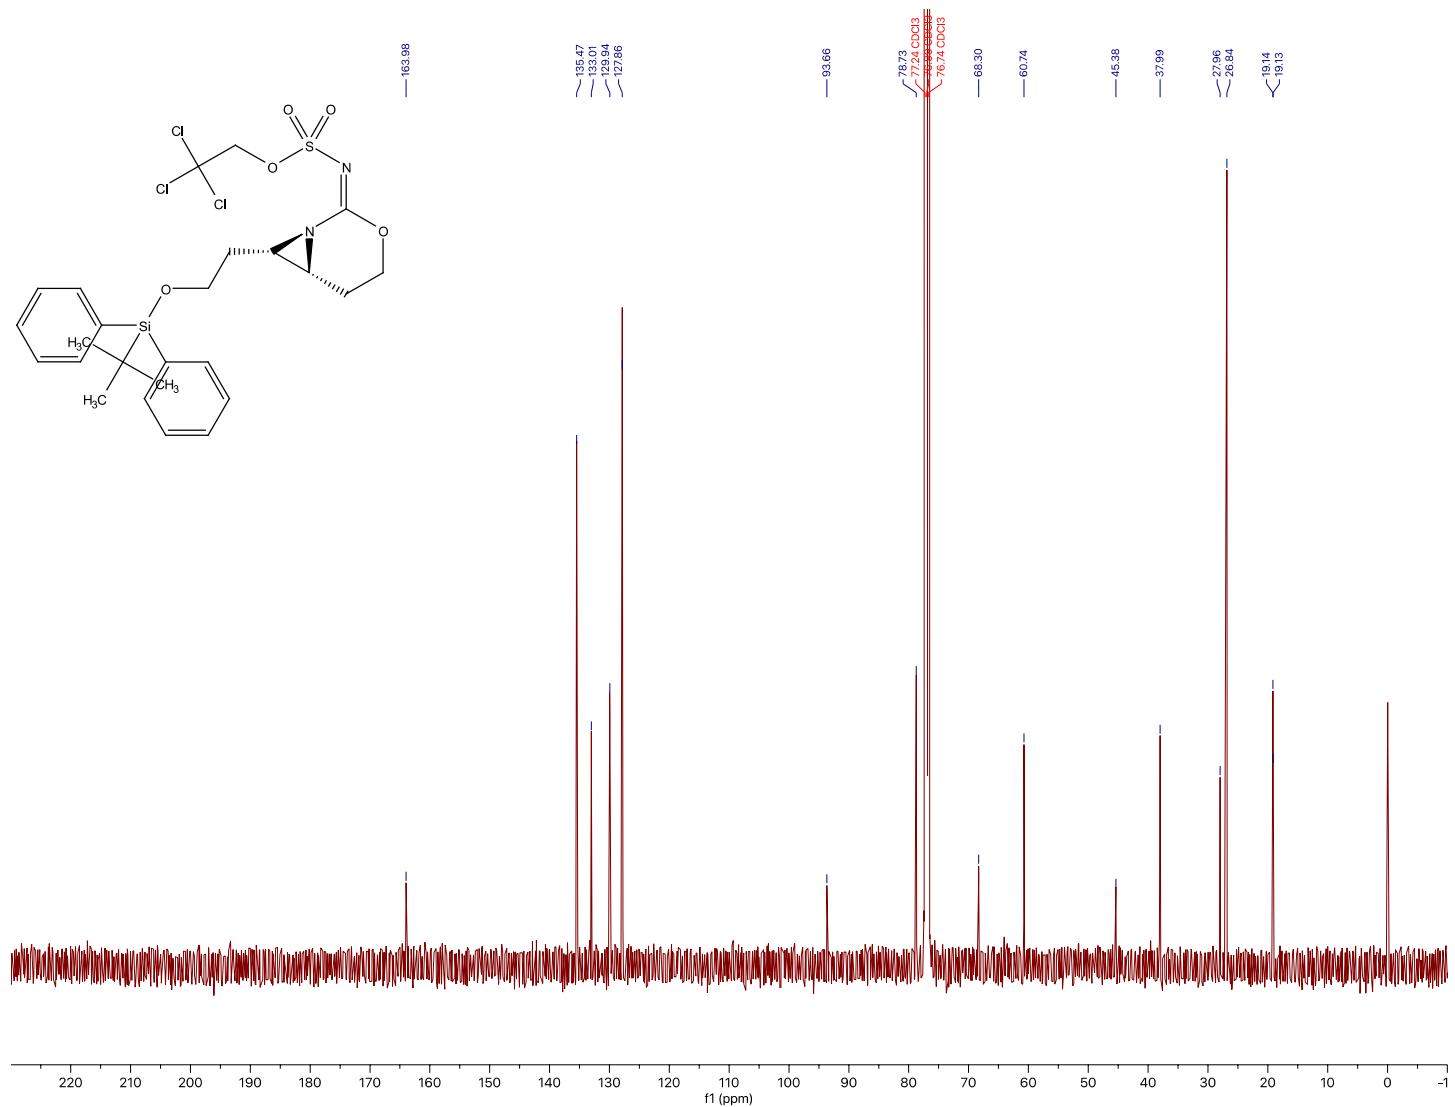

<sup>1</sup>H NMR (500 MHz, CDCl<sub>3</sub>) for **Compound 2i**

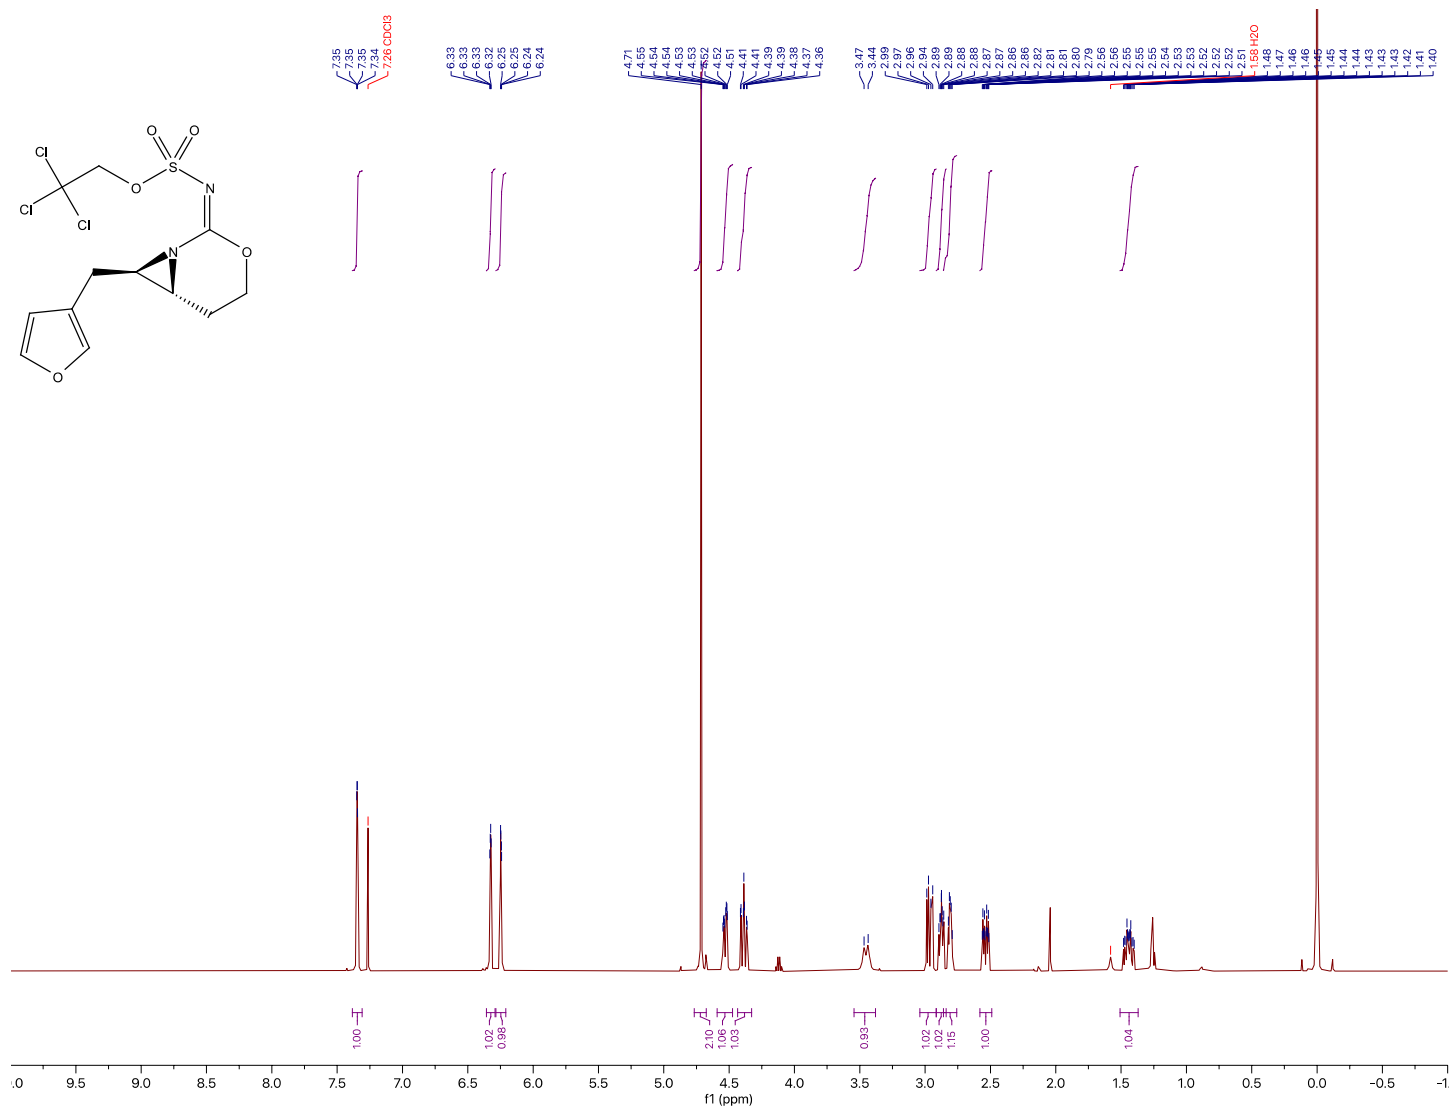

$^{13}\text{C}$  NMR (126 MHz,  $\text{CDCl}_3$ ) for **Compound 2i**

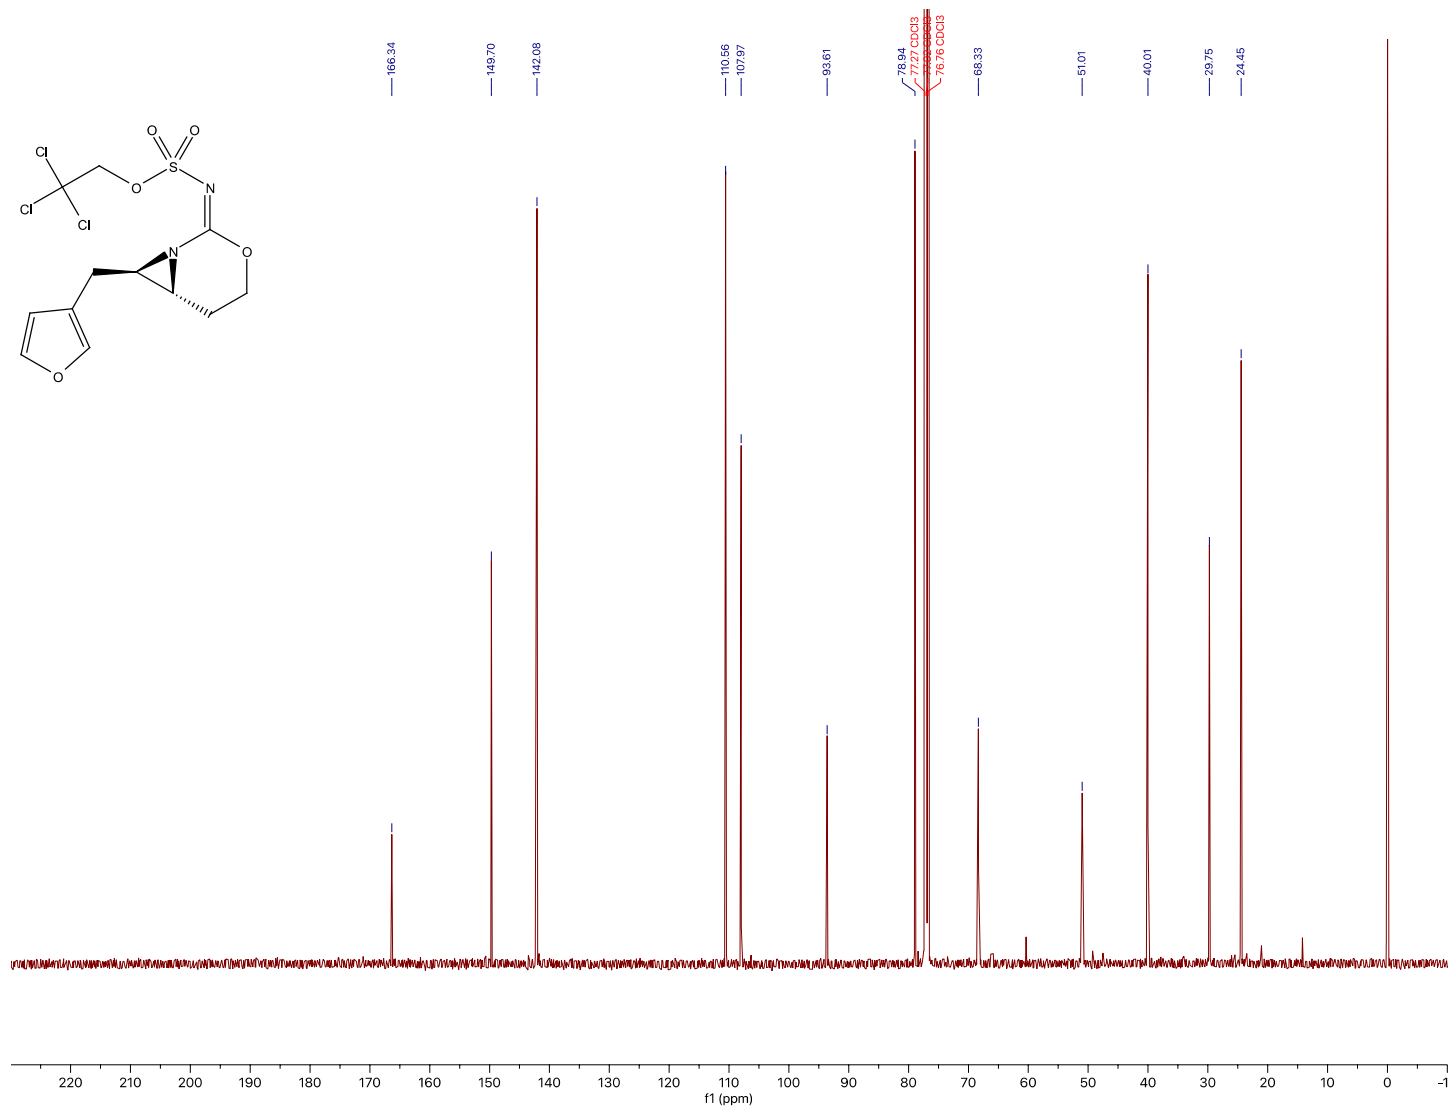



<sup>1</sup>H NMR (500 MHz, CDCl<sub>3</sub>) for **Compound 2j**

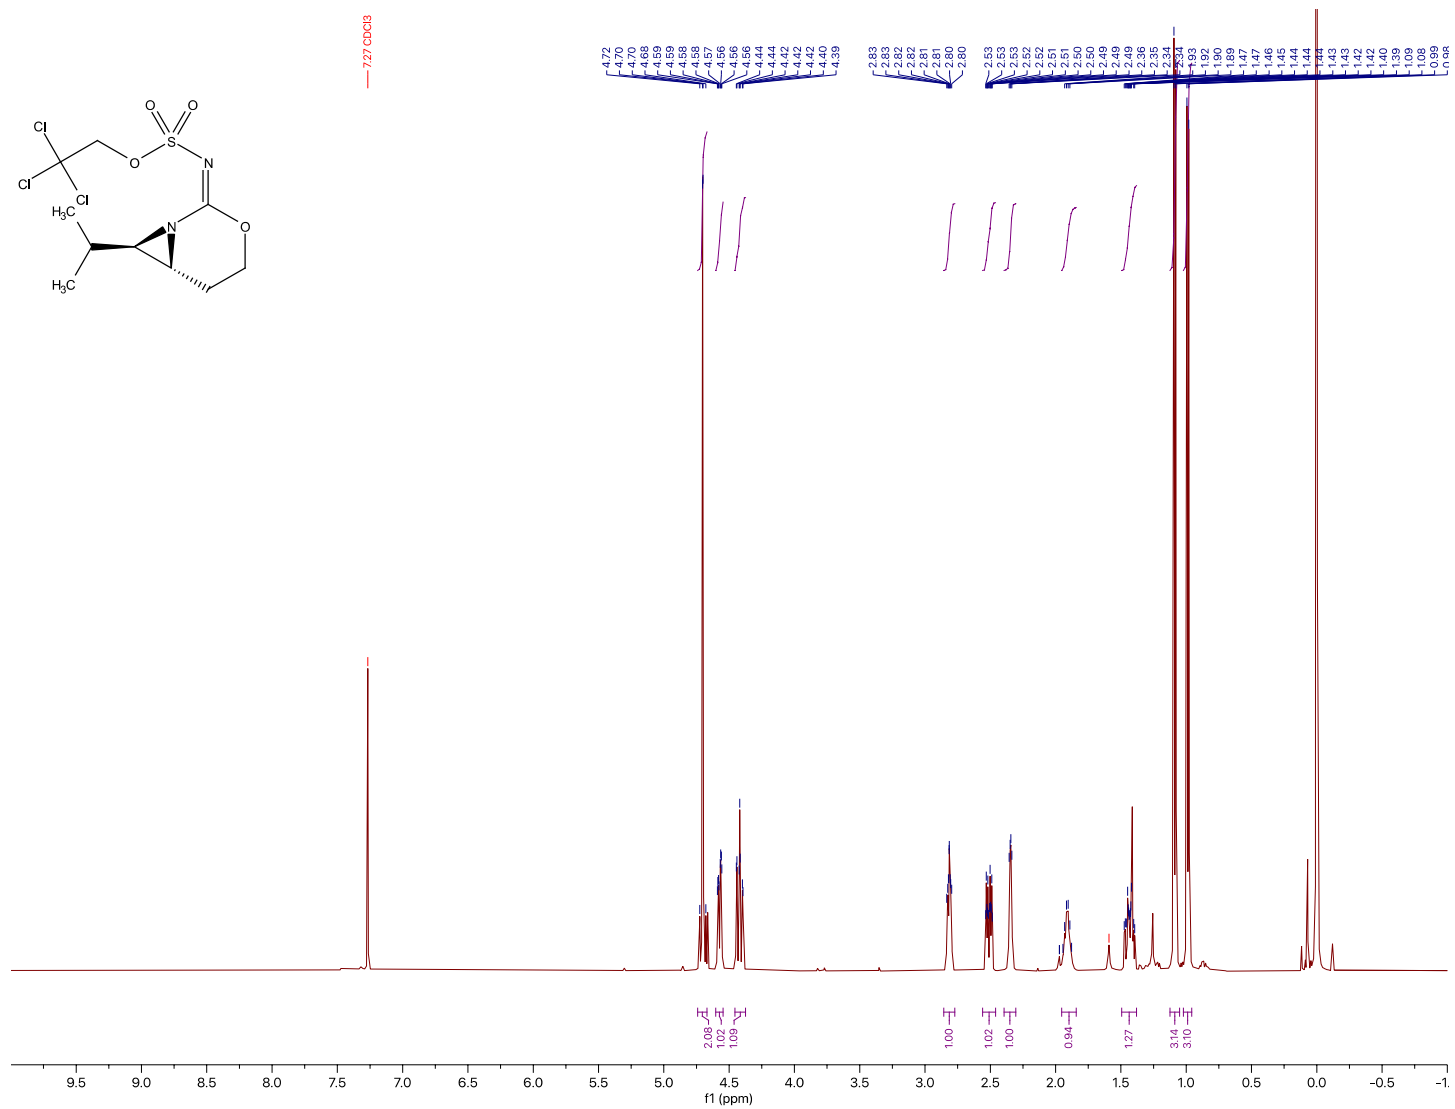

$^{13}\text{C}$  NMR (126 MHz,  $\text{CDCl}_3$ ) for **Compound 2j**

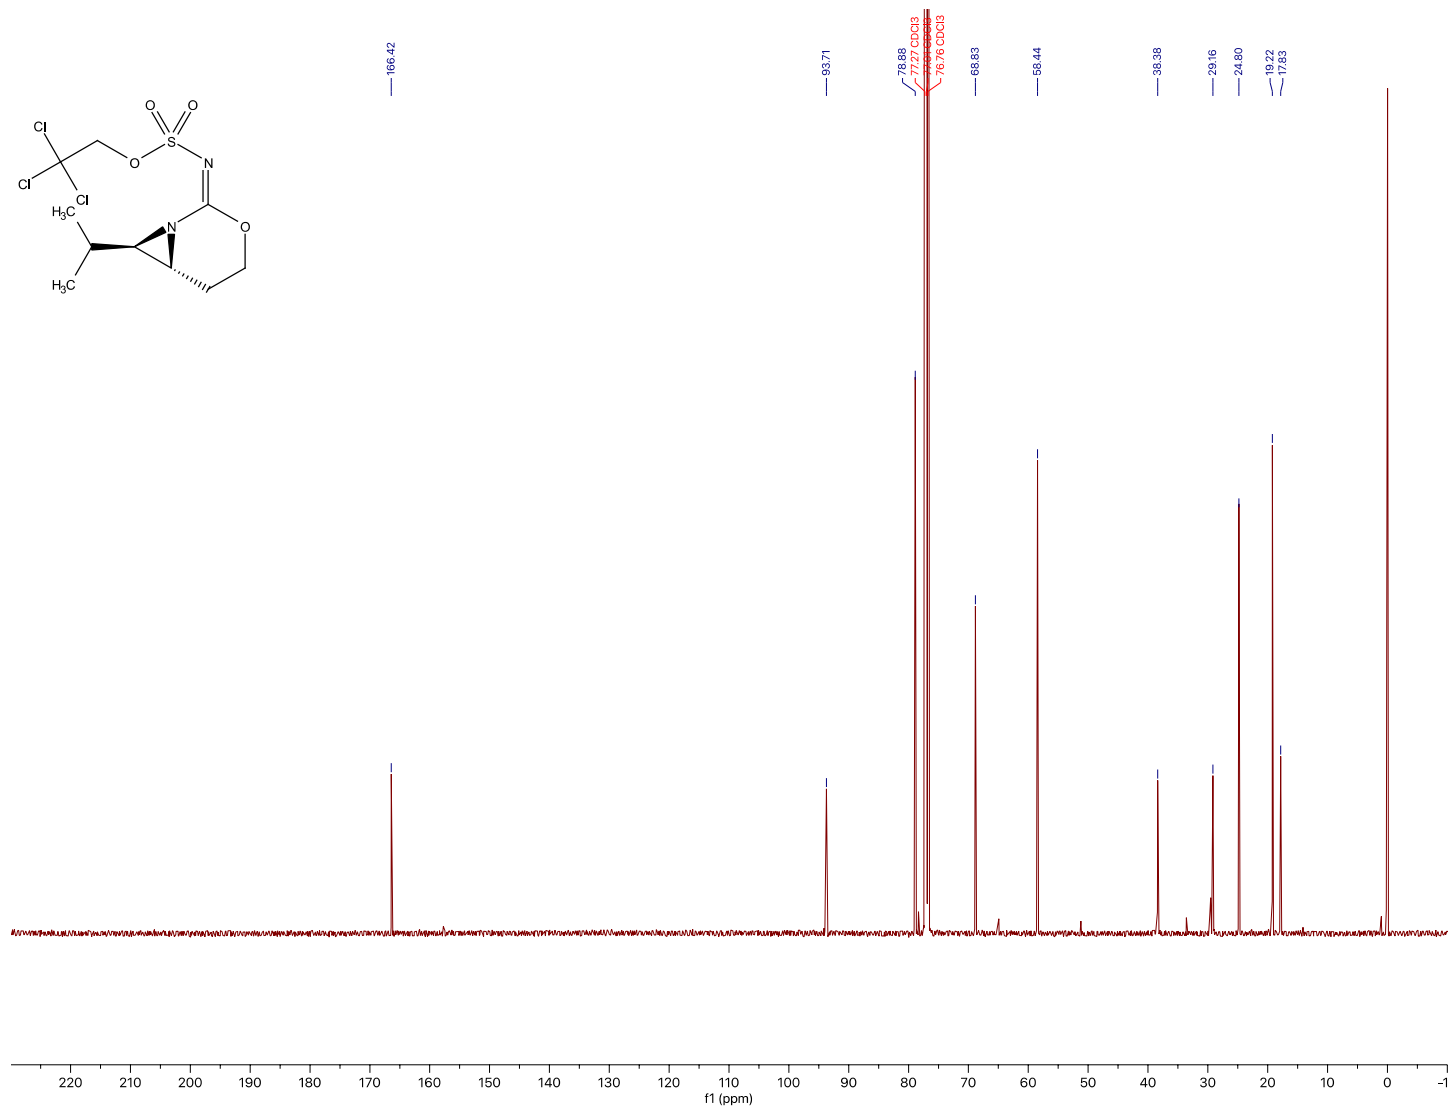

<sup>1</sup>H NMR (500 MHz, CDCl<sub>3</sub>) for Compound 2k

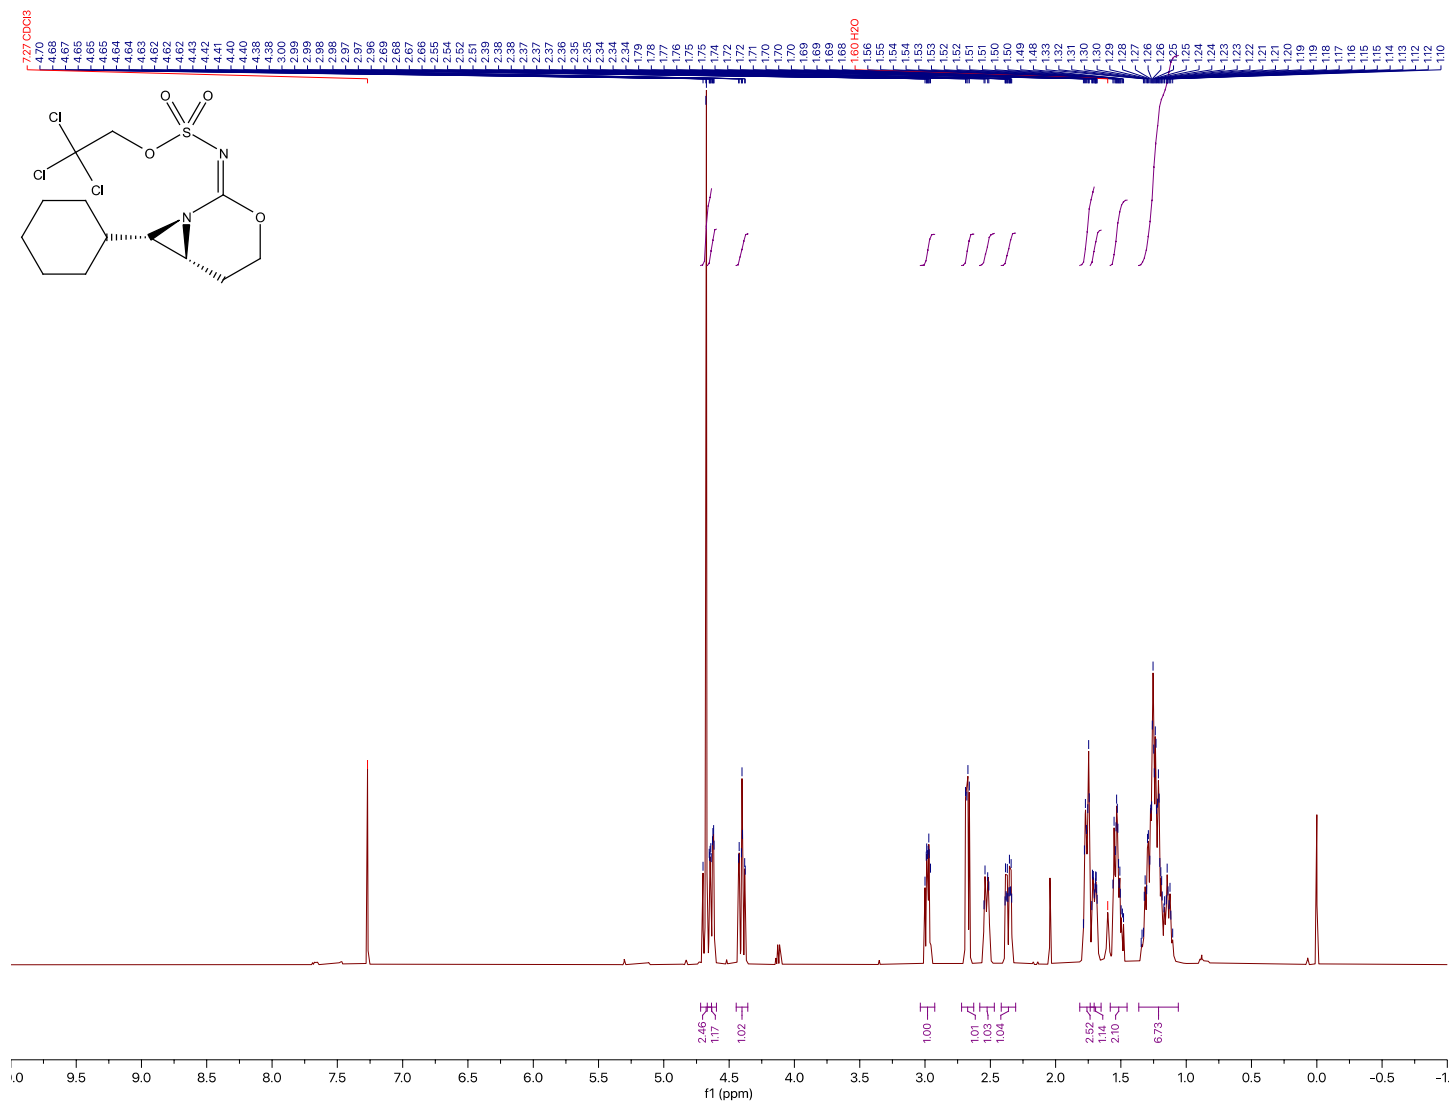

$^{13}\text{C}$  NMR (126 MHz,  $\text{CDCl}_3$ ) for **Compound 2k**

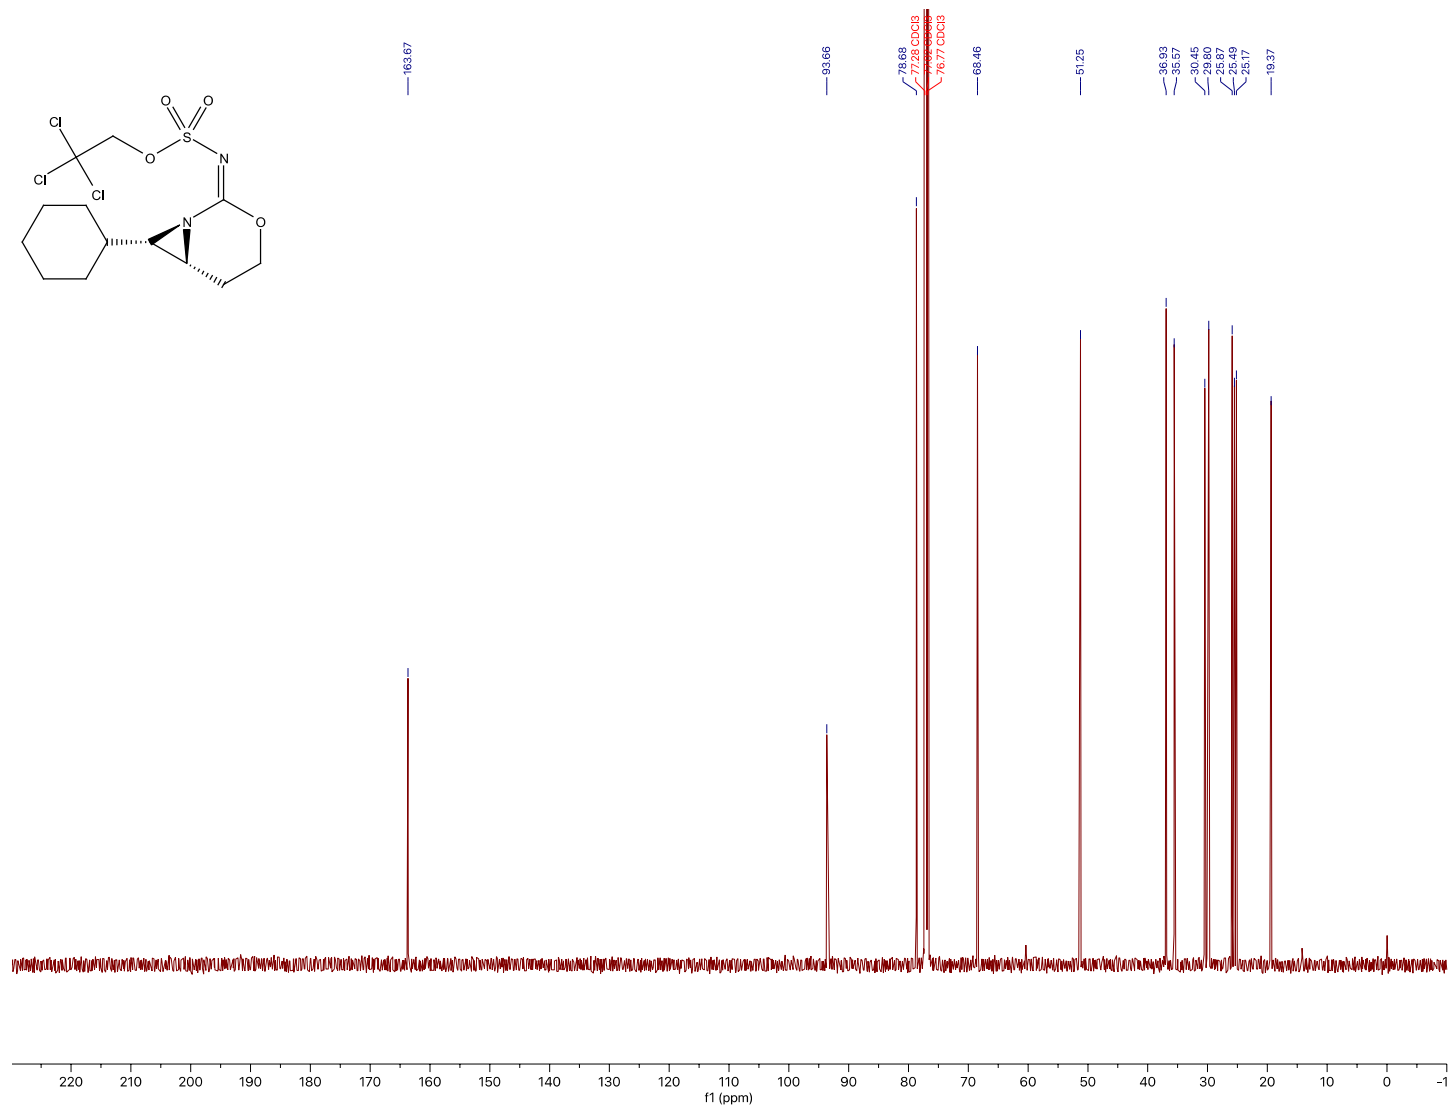

<sup>1</sup>H NMR (500 MHz, CDCl<sub>3</sub>) for **Compound 21**

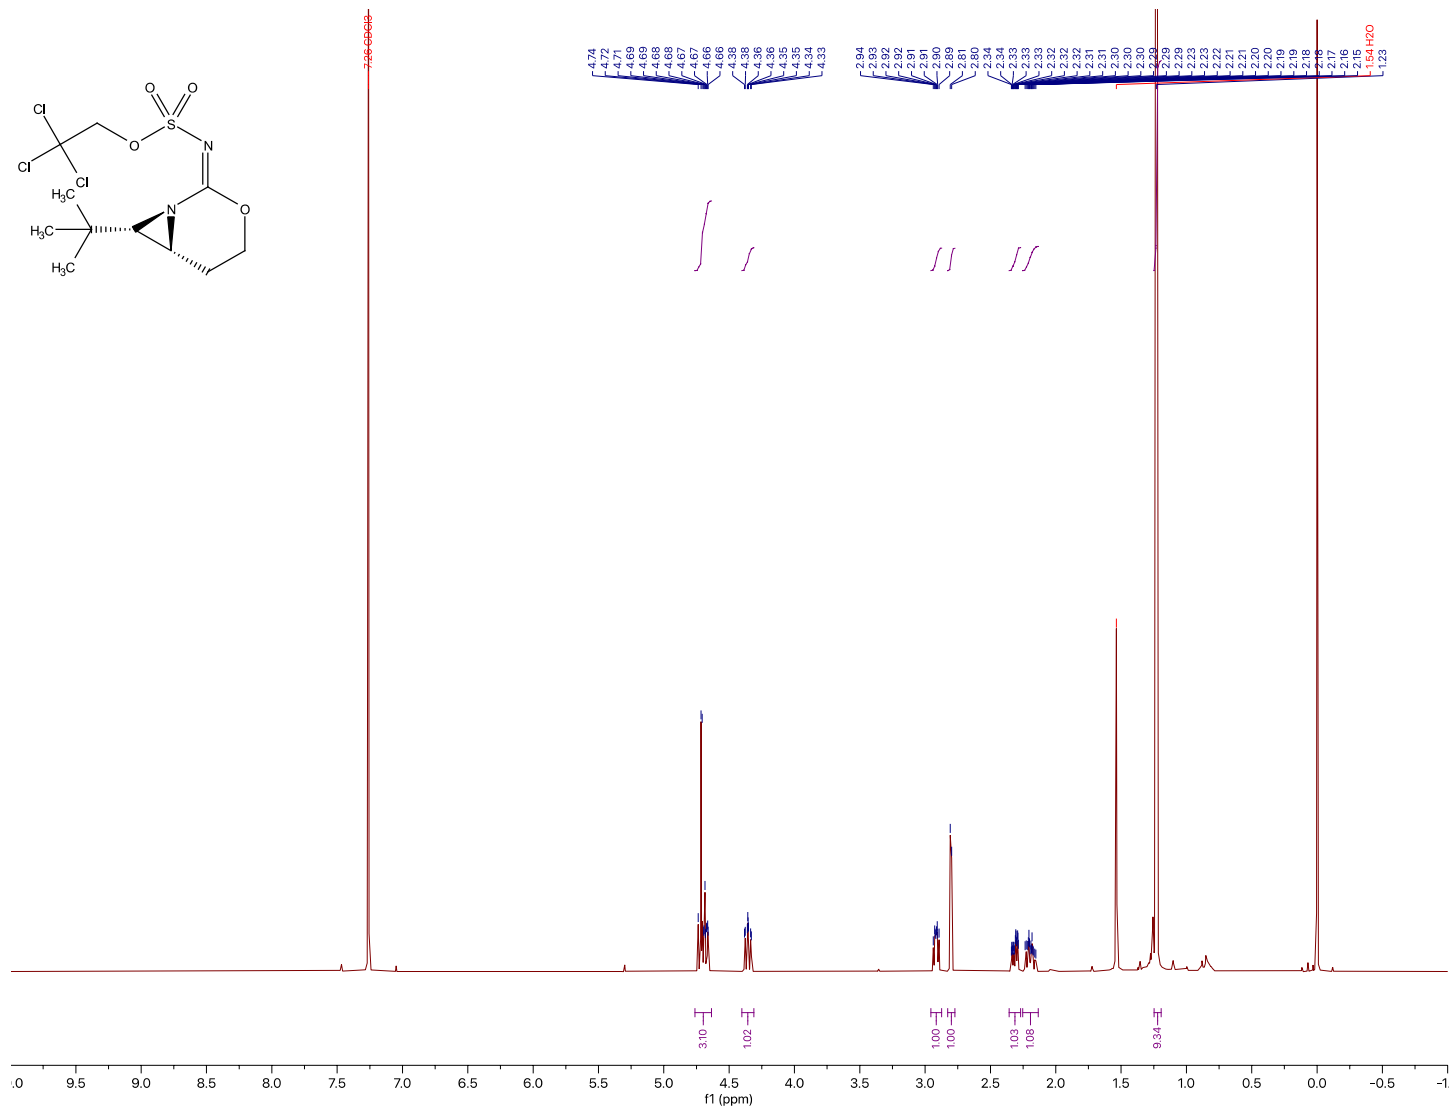

$^{13}\text{C}$  NMR (126 MHz,  $\text{CDCl}_3$ ) for **Compound 21**

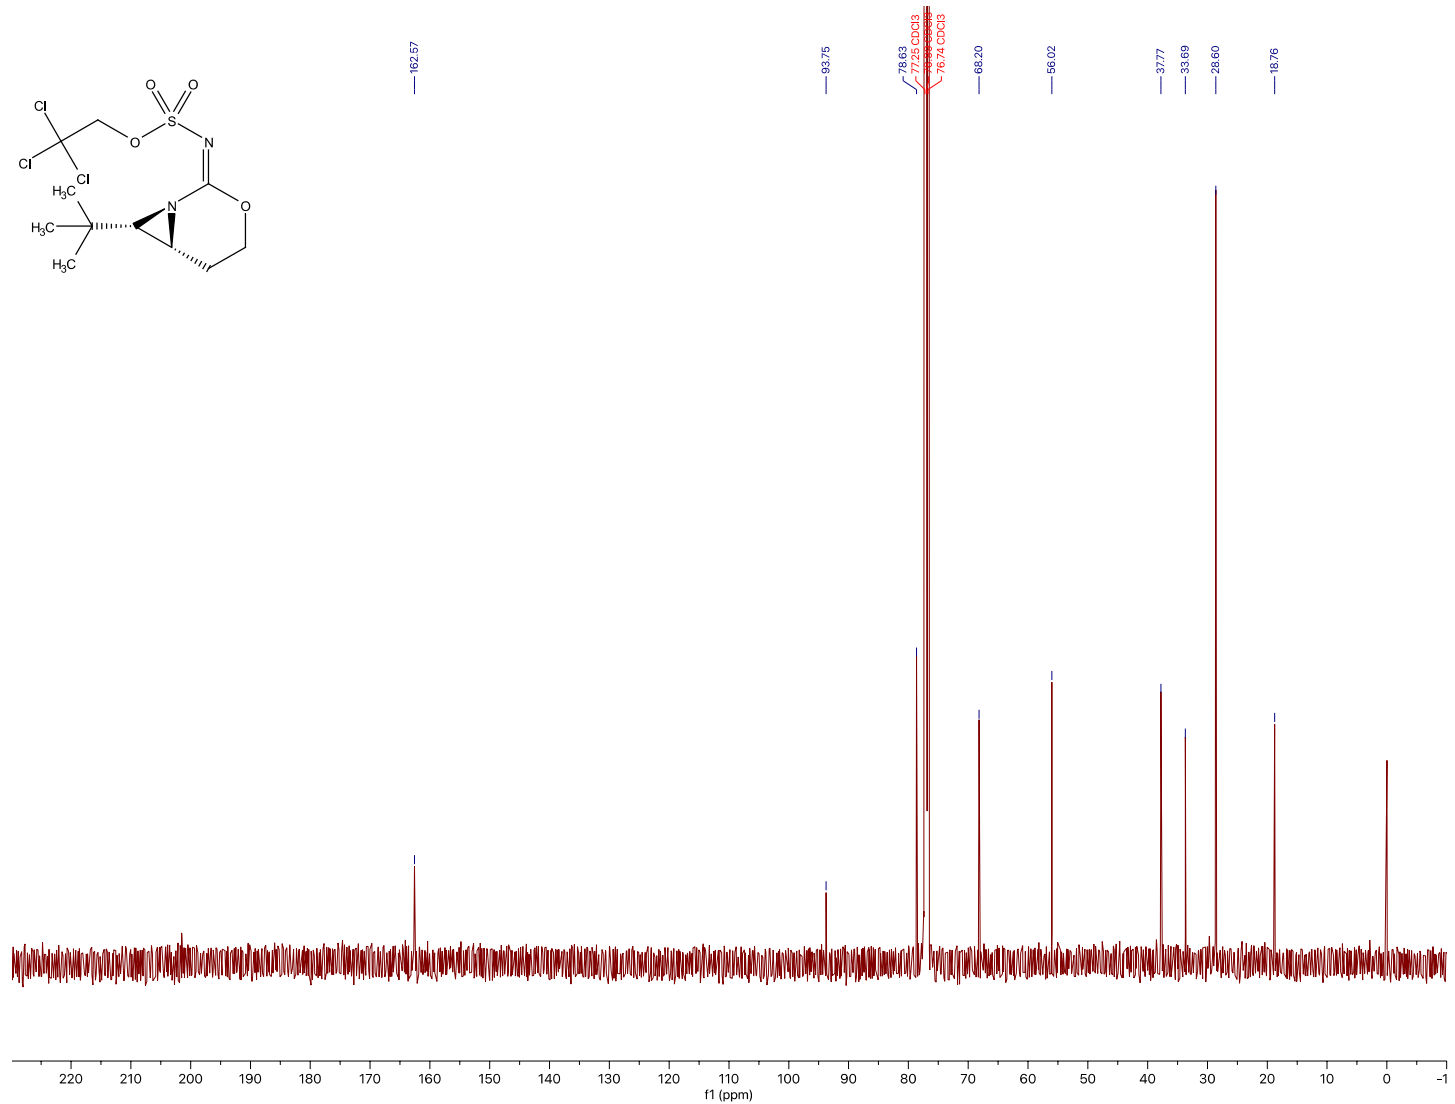

<sup>1</sup>H NMR (500 MHz, CDCl<sub>3</sub>) for Compound 2m

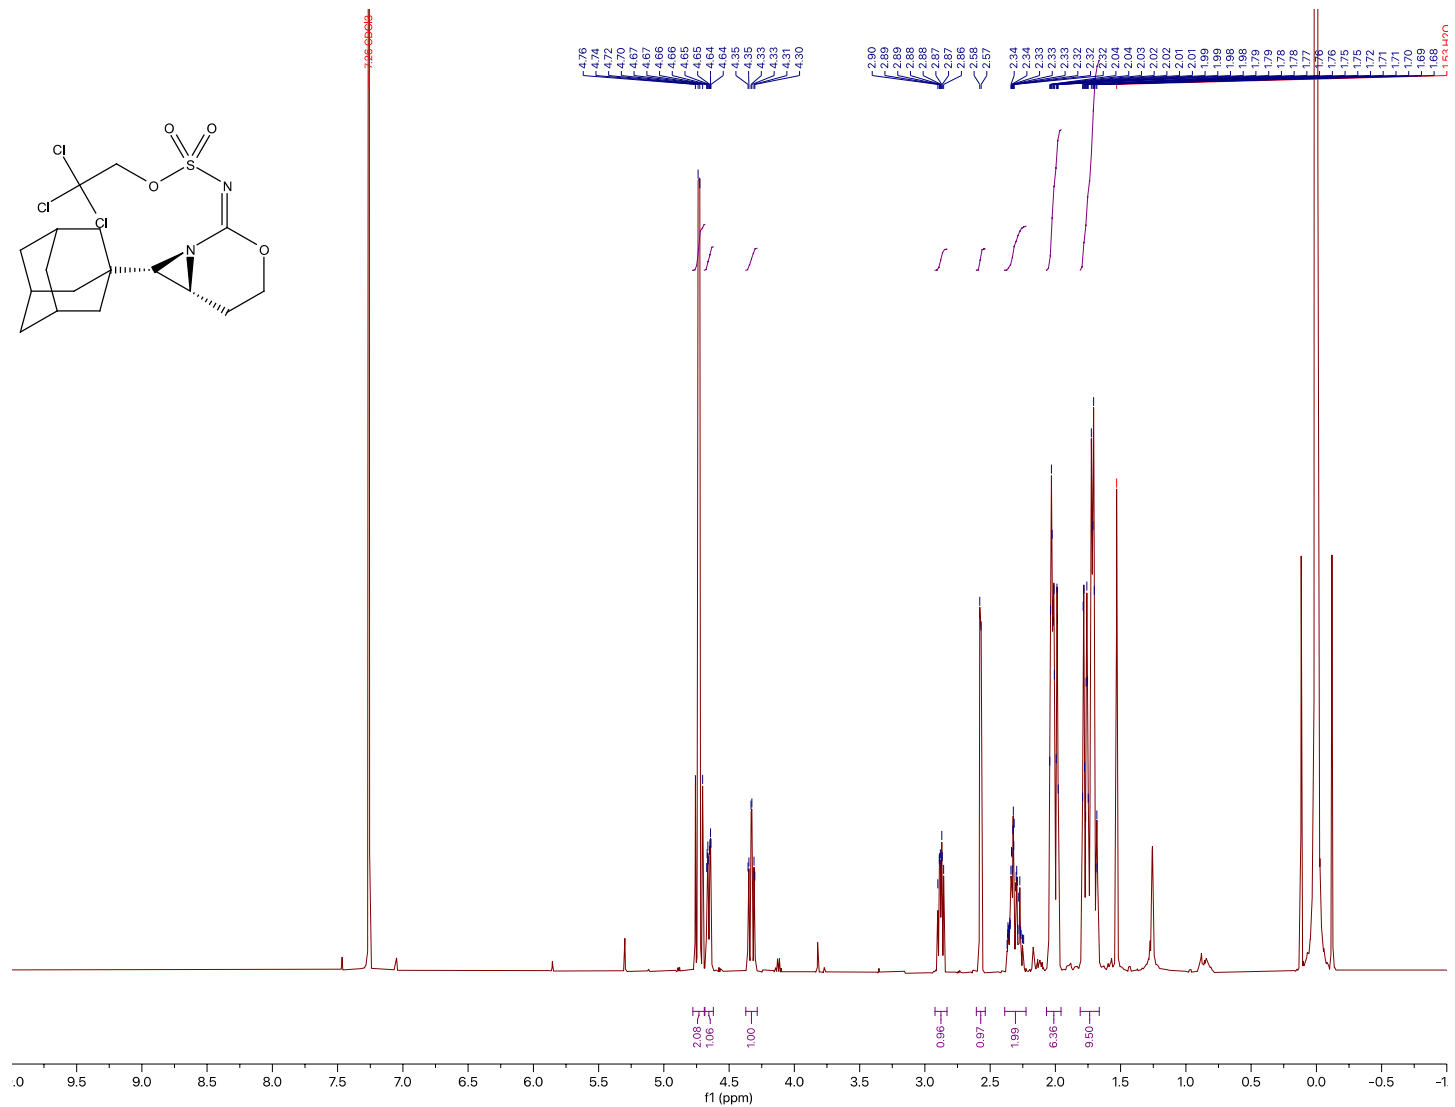

$^{13}\text{C}$  NMR (126 MHz,  $\text{CDCl}_3$ ) for **Compound 2m**

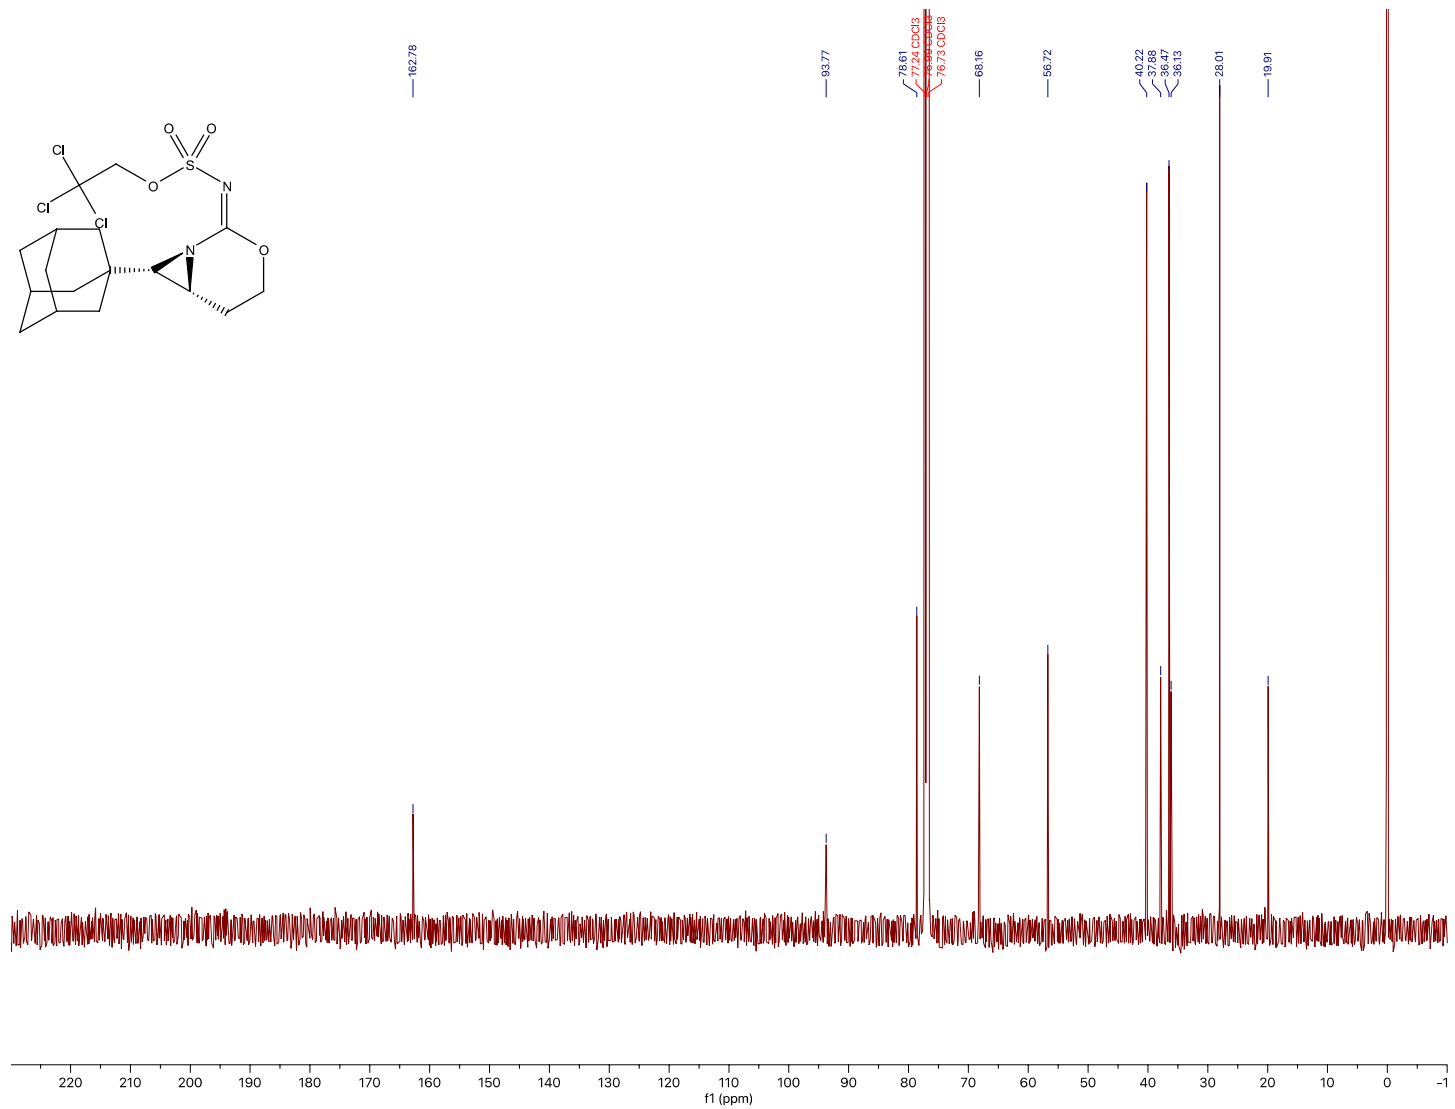



<sup>1</sup>H NMR (500 MHz, CDCl<sub>3</sub>) for Compound 2n

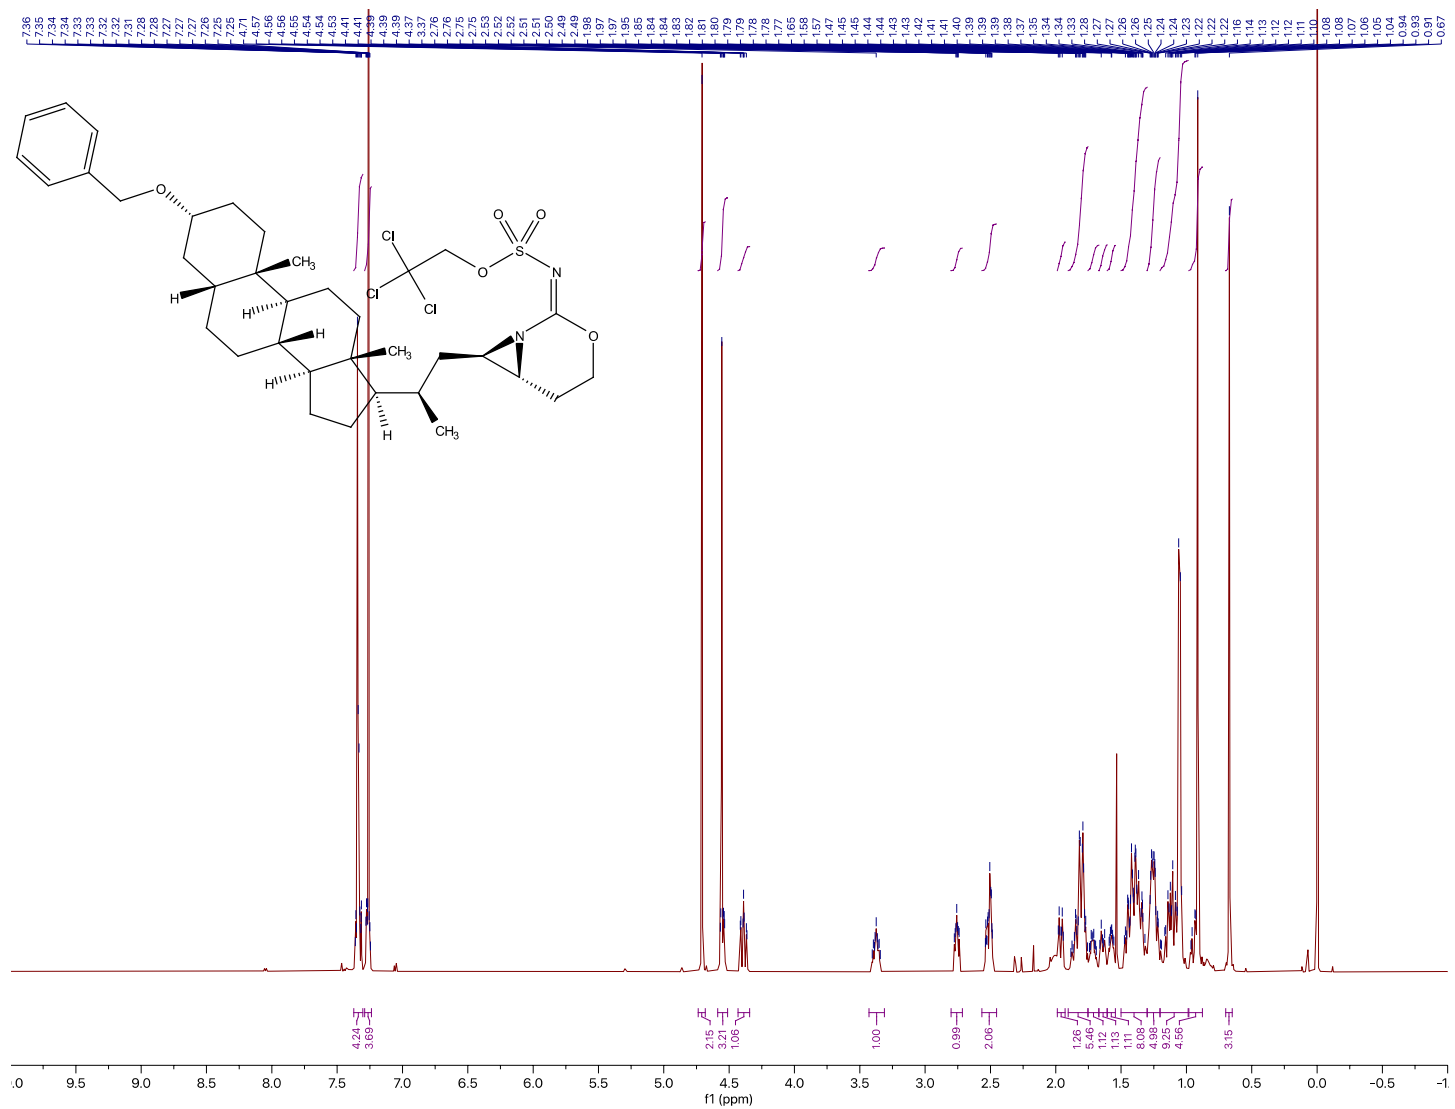





$^{13}\text{C}$  NMR (126 MHz,  $\text{CDCl}_3$ ) for **Compound 2o** (major diastereomer)

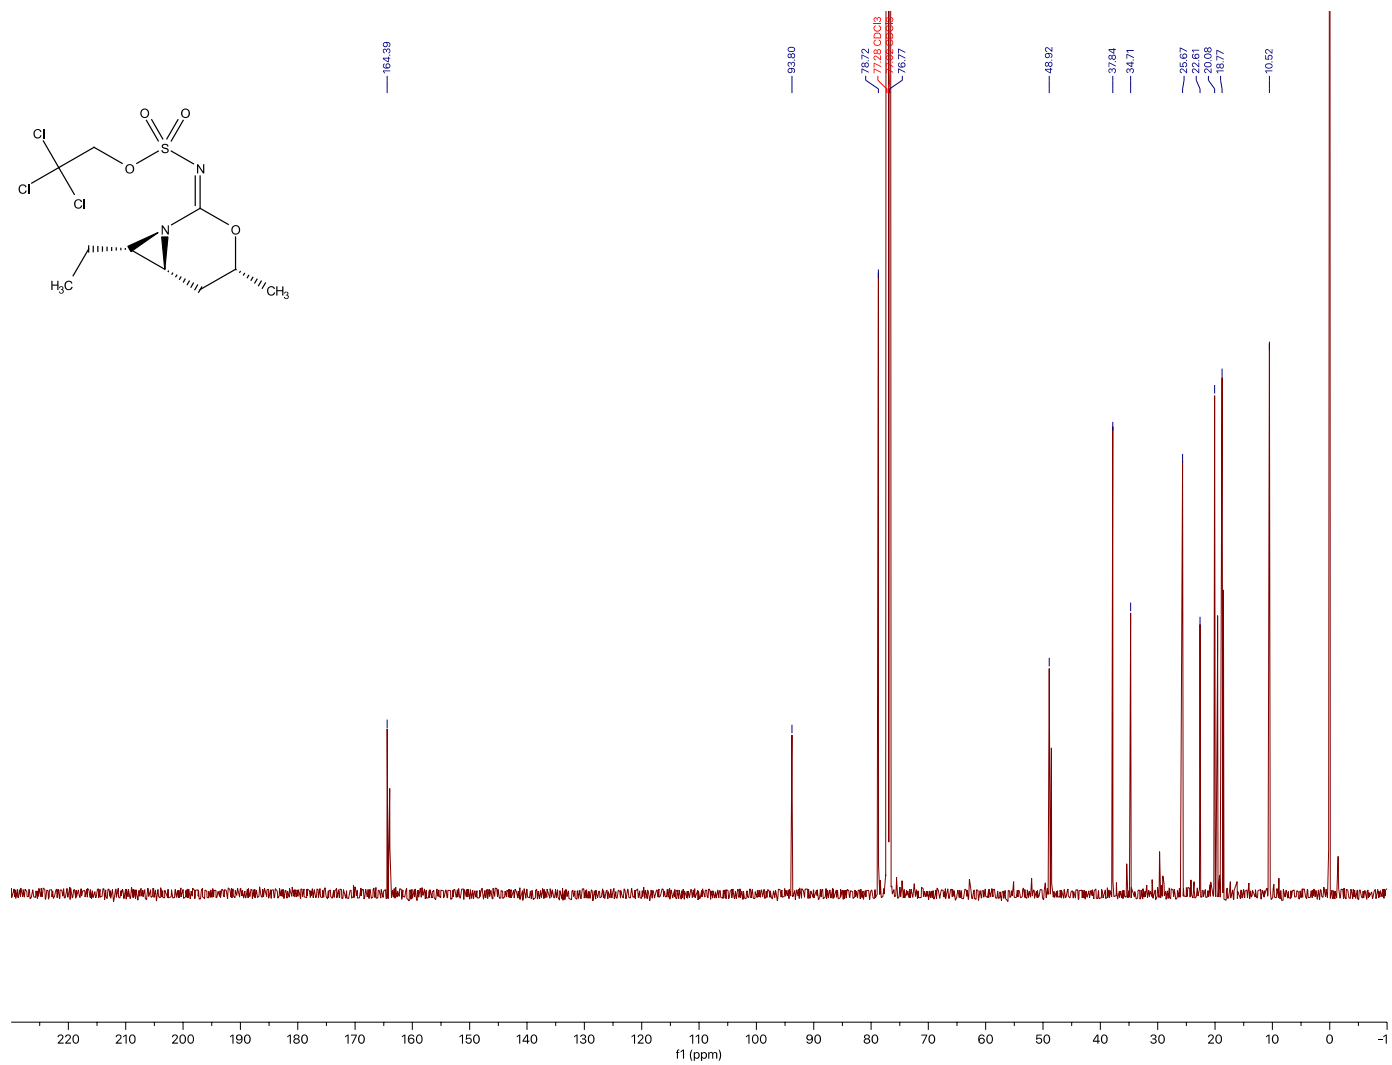

NOESY NMR (500 MHz, CDCl<sub>3</sub>) for **Compound 2o** (major diastereomer).

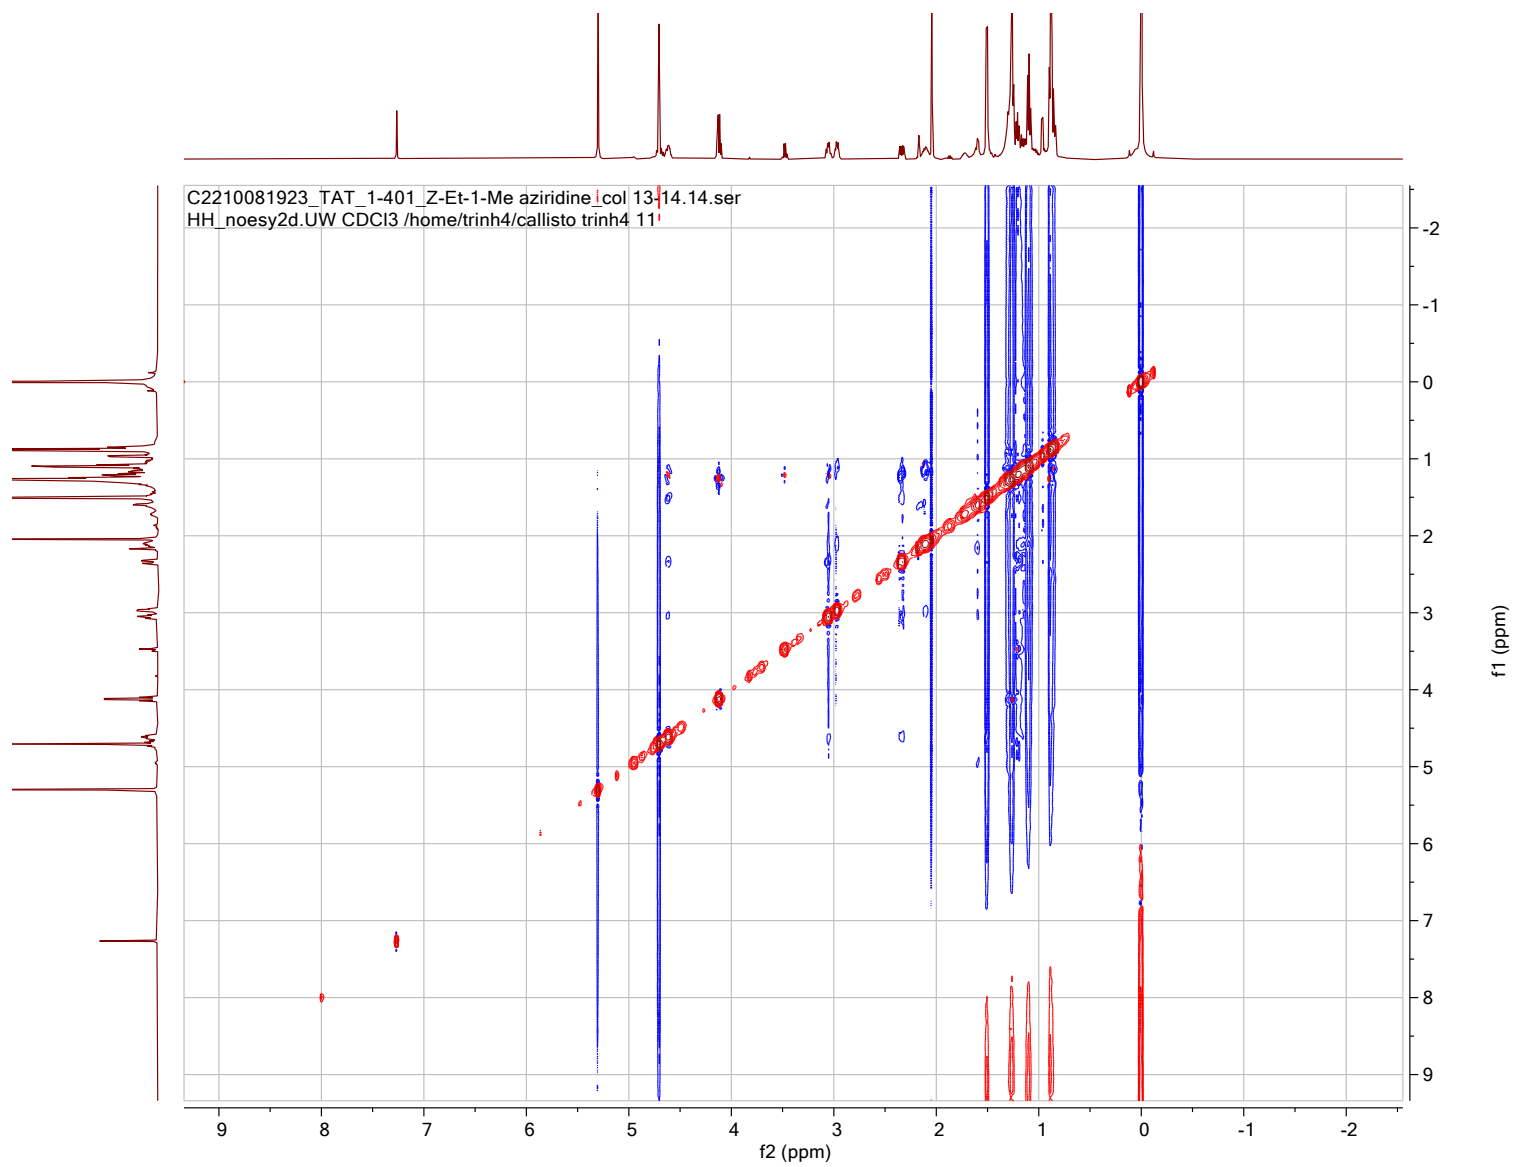

S165

NOESY NMR (500 MHz, CDCl<sub>3</sub>) for **Compound 2o** (minor diastereomer).

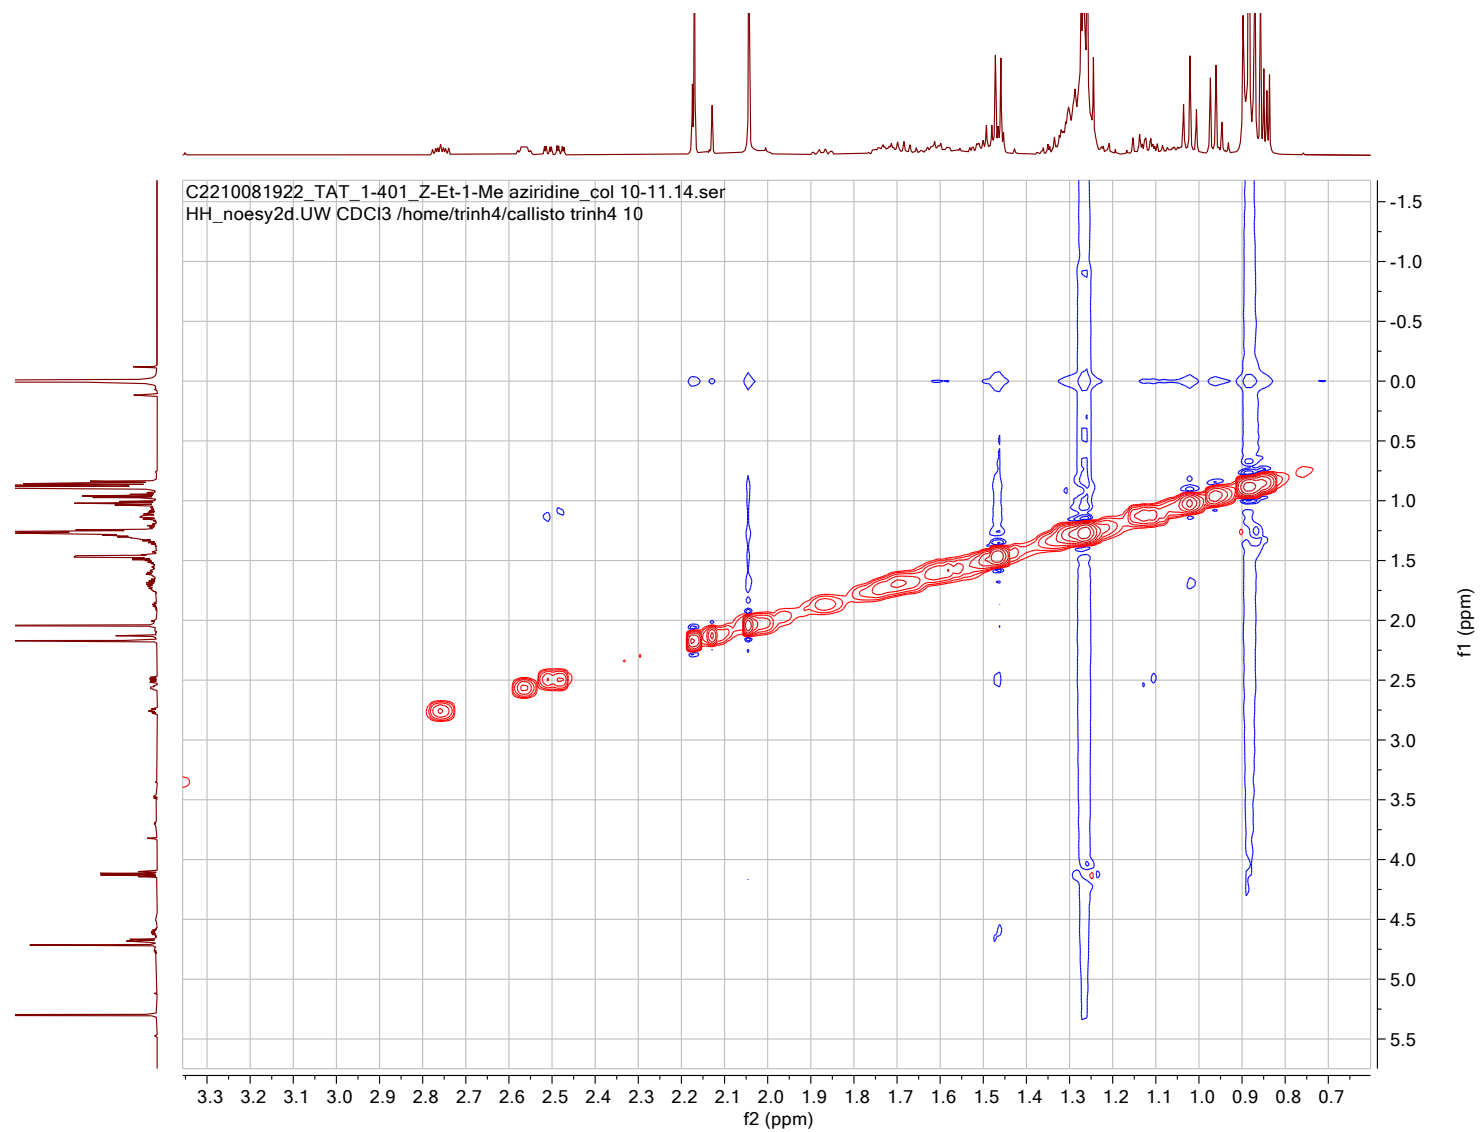

<sup>1</sup>H NMR (500 MHz, CDCl<sub>3</sub>) for Compound 2p

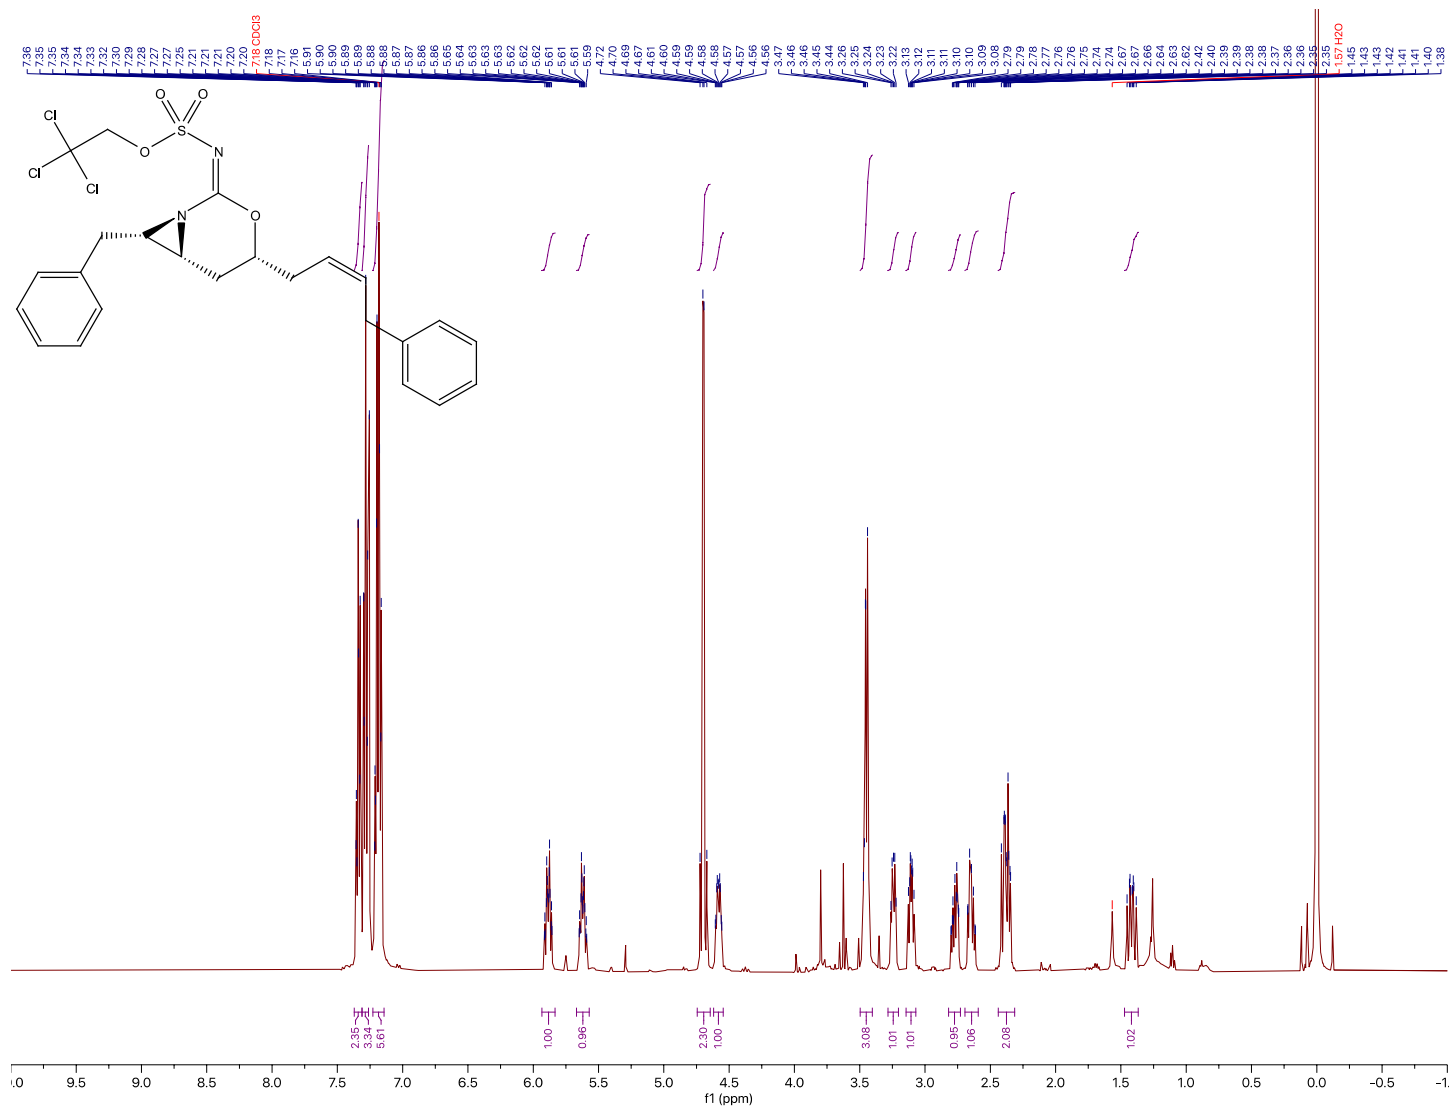

$^{13}\text{C}$  NMR (126 MHz,  $\text{CDCl}_3$ ) for **Compound 2p**

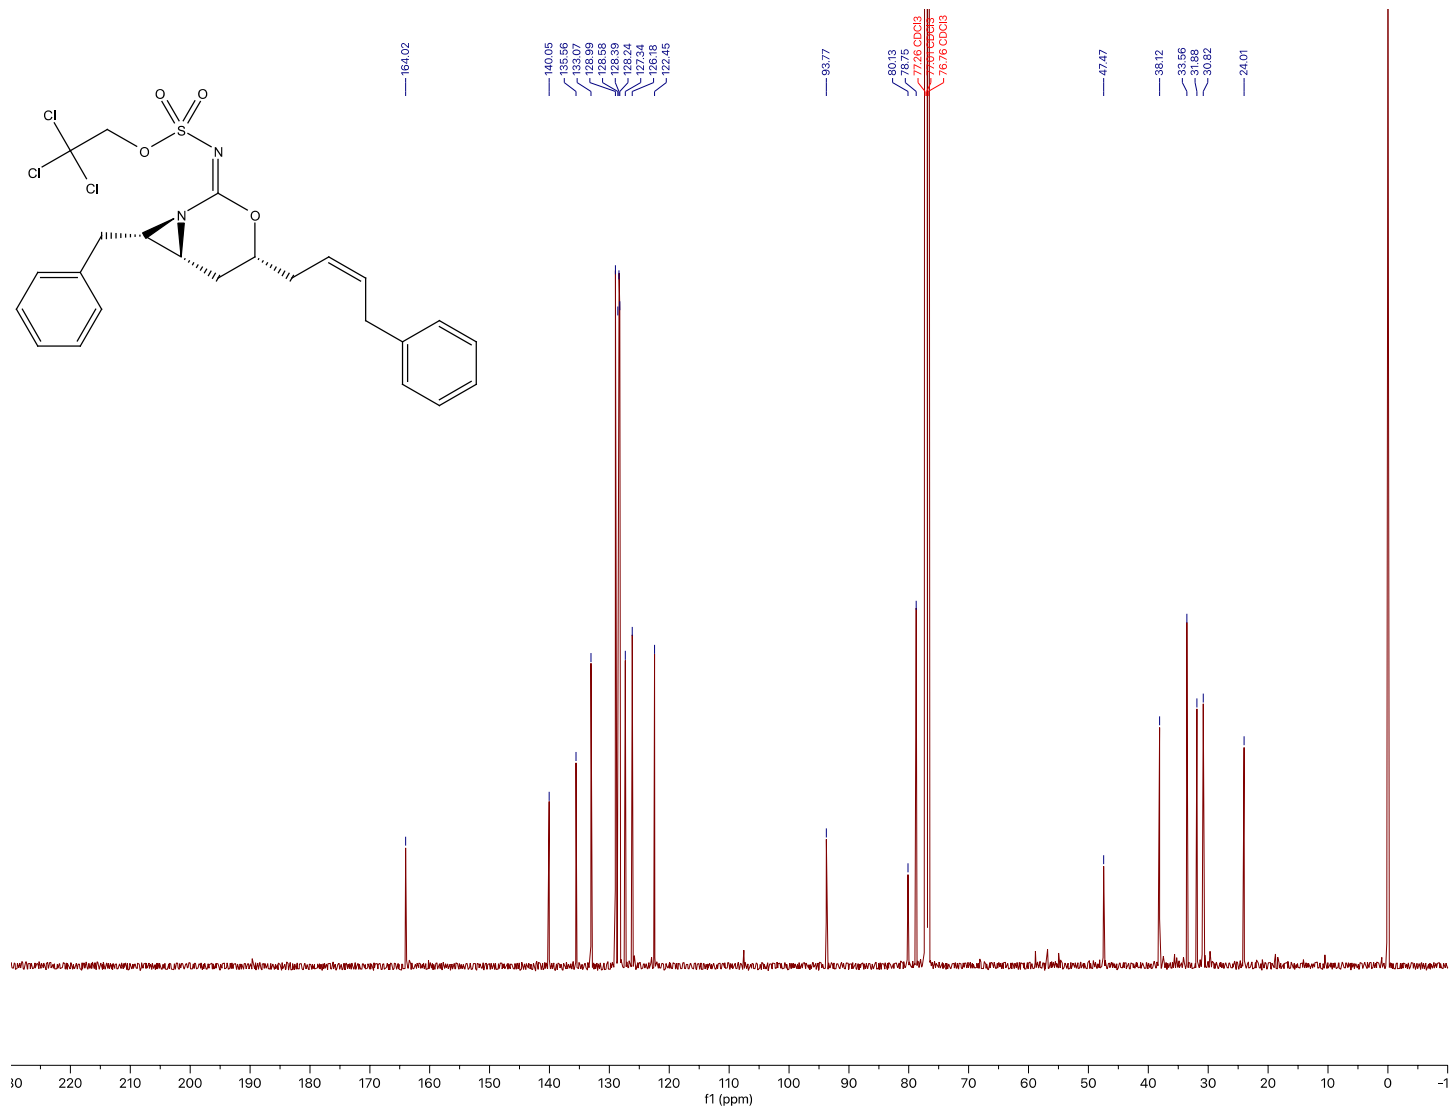



NOESY NMR (500 MHz, CDCl<sub>3</sub>) for **Compound 2p**

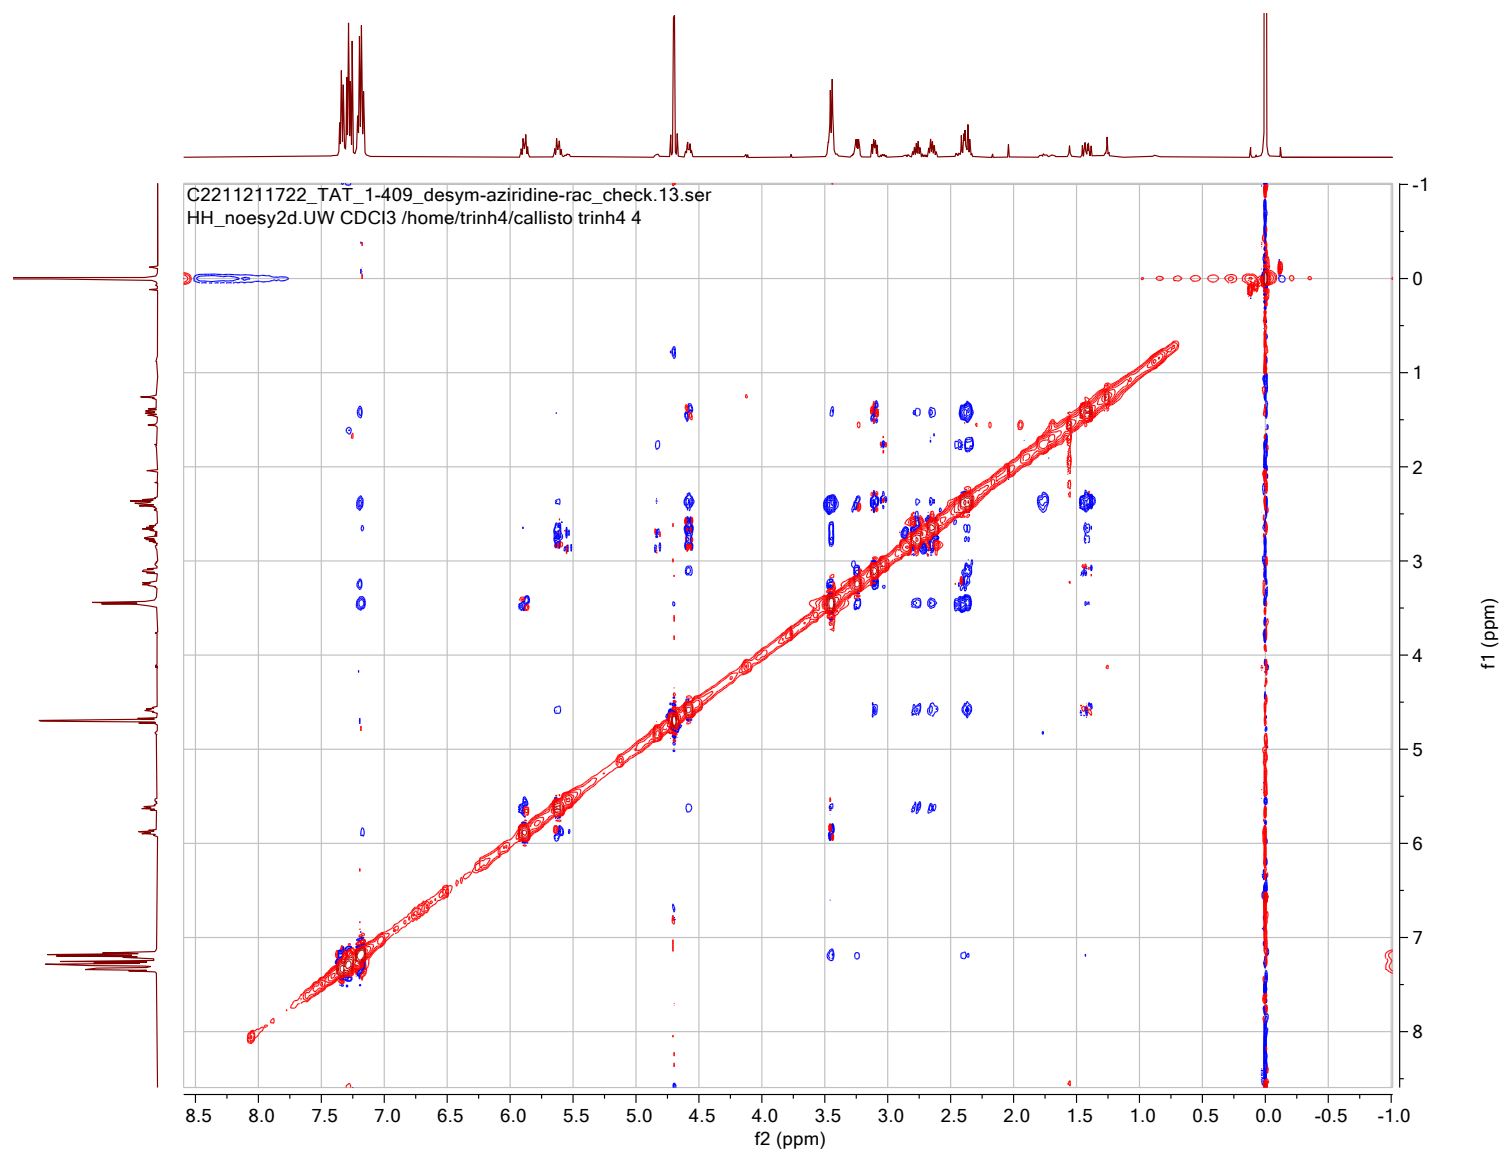

<sup>1</sup>H NMR (500 MHz, CDCl<sub>3</sub>) for Compound 2q

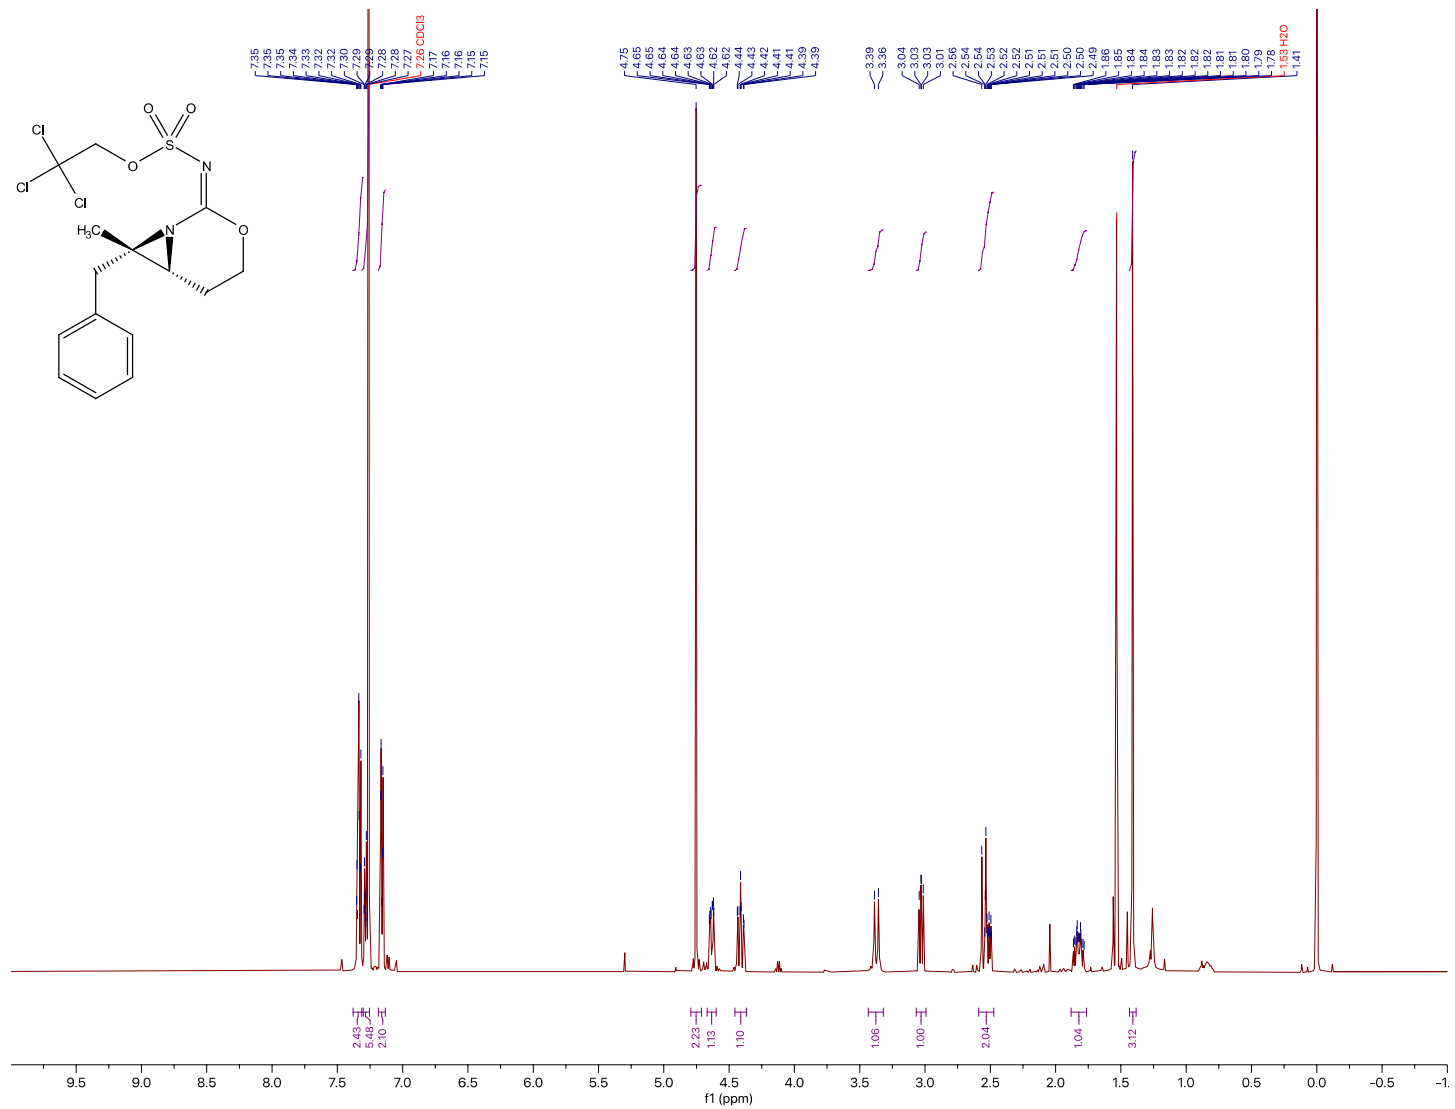

$^{13}\text{C}$  NMR (126 MHz,  $\text{CDCl}_3$ ) for **Compound 2q**

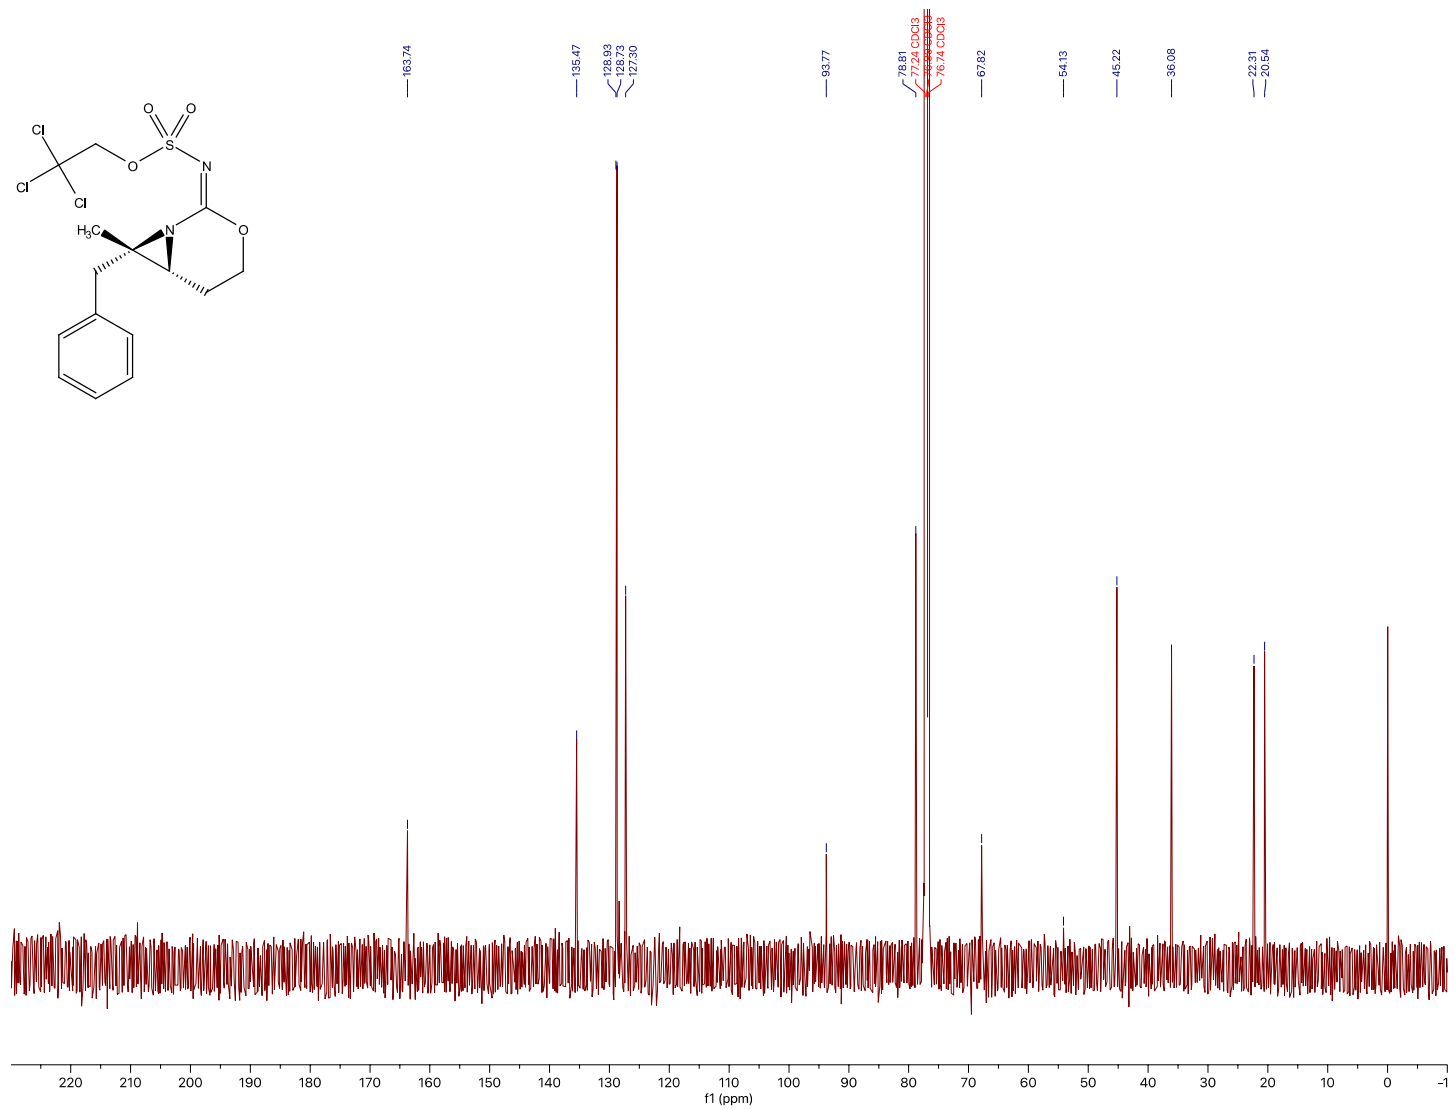

<sup>1</sup>H NMR (500 MHz, CDCl<sub>3</sub>) for **Compound 2r**

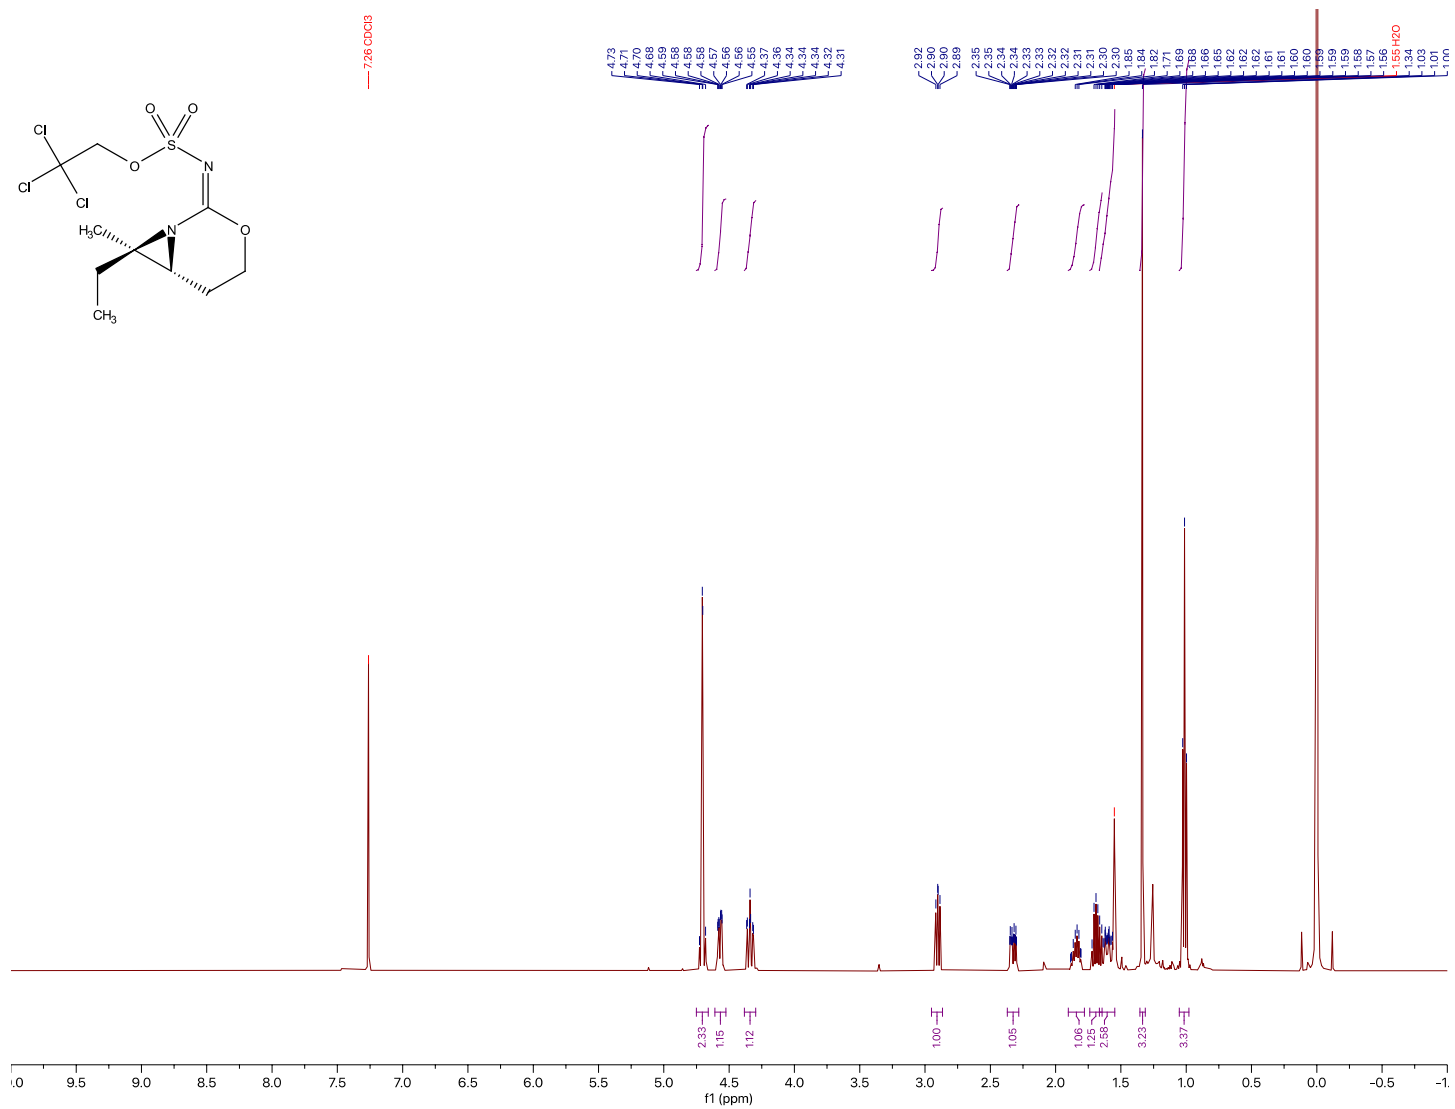

$^{13}\text{C}$  NMR (126 MHz,  $\text{CDCl}_3$ ) for **Compound 2r**

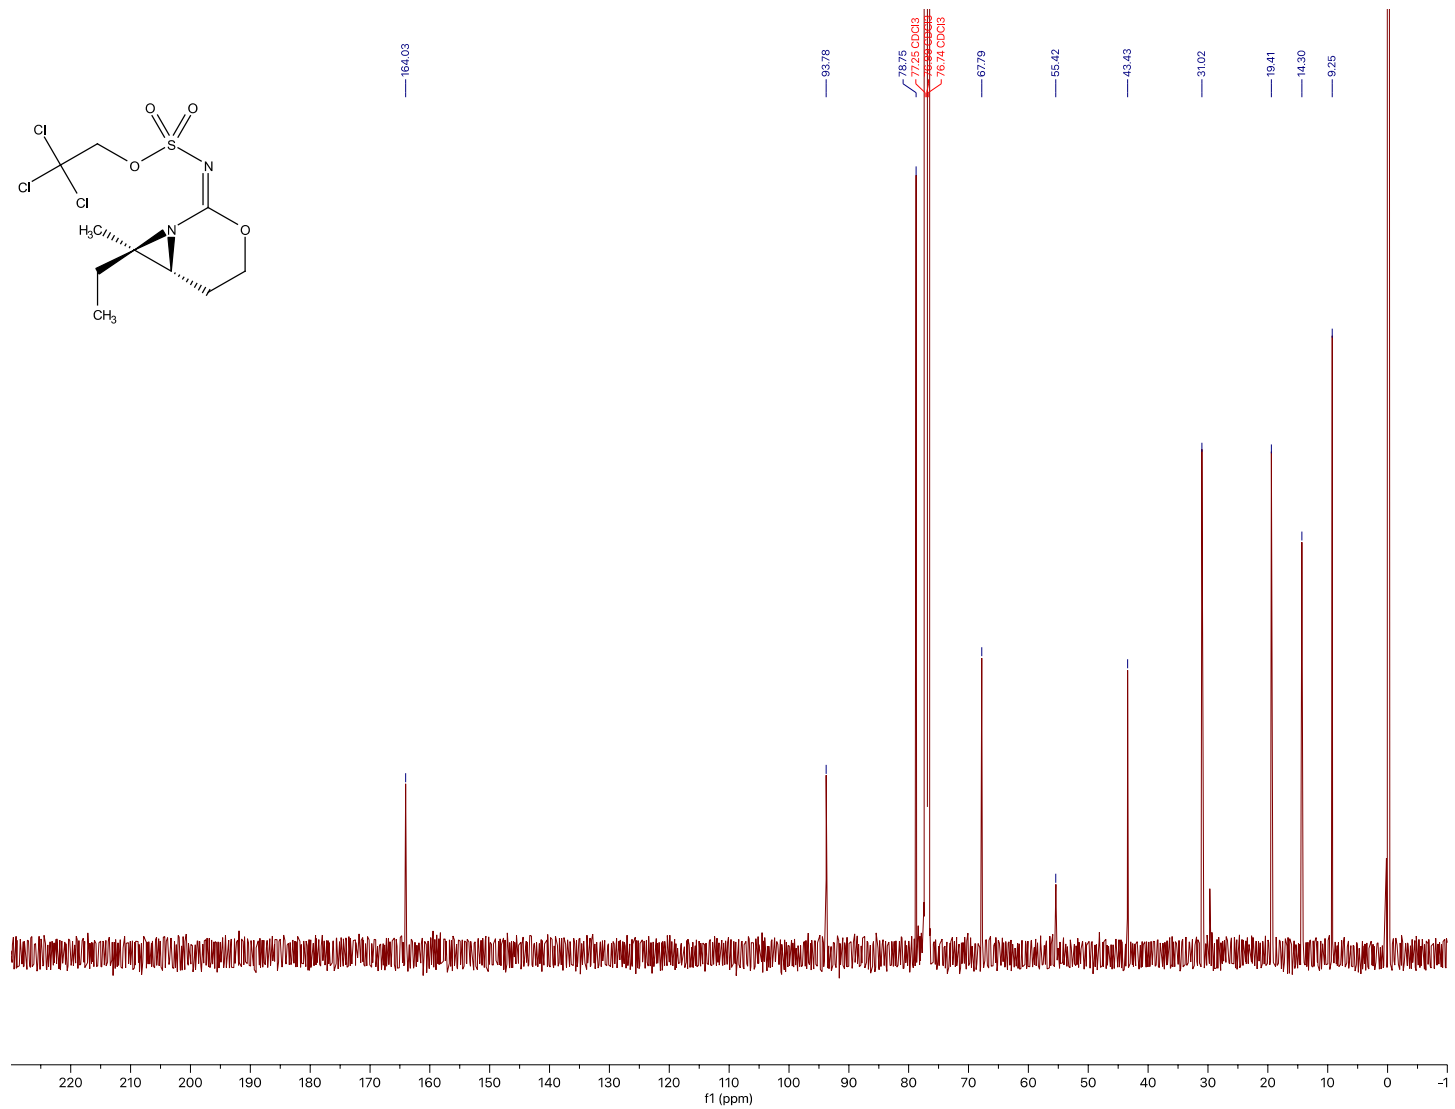

<sup>1</sup>H NMR (500 MHz, CDCl<sub>3</sub>) for Compound 2s

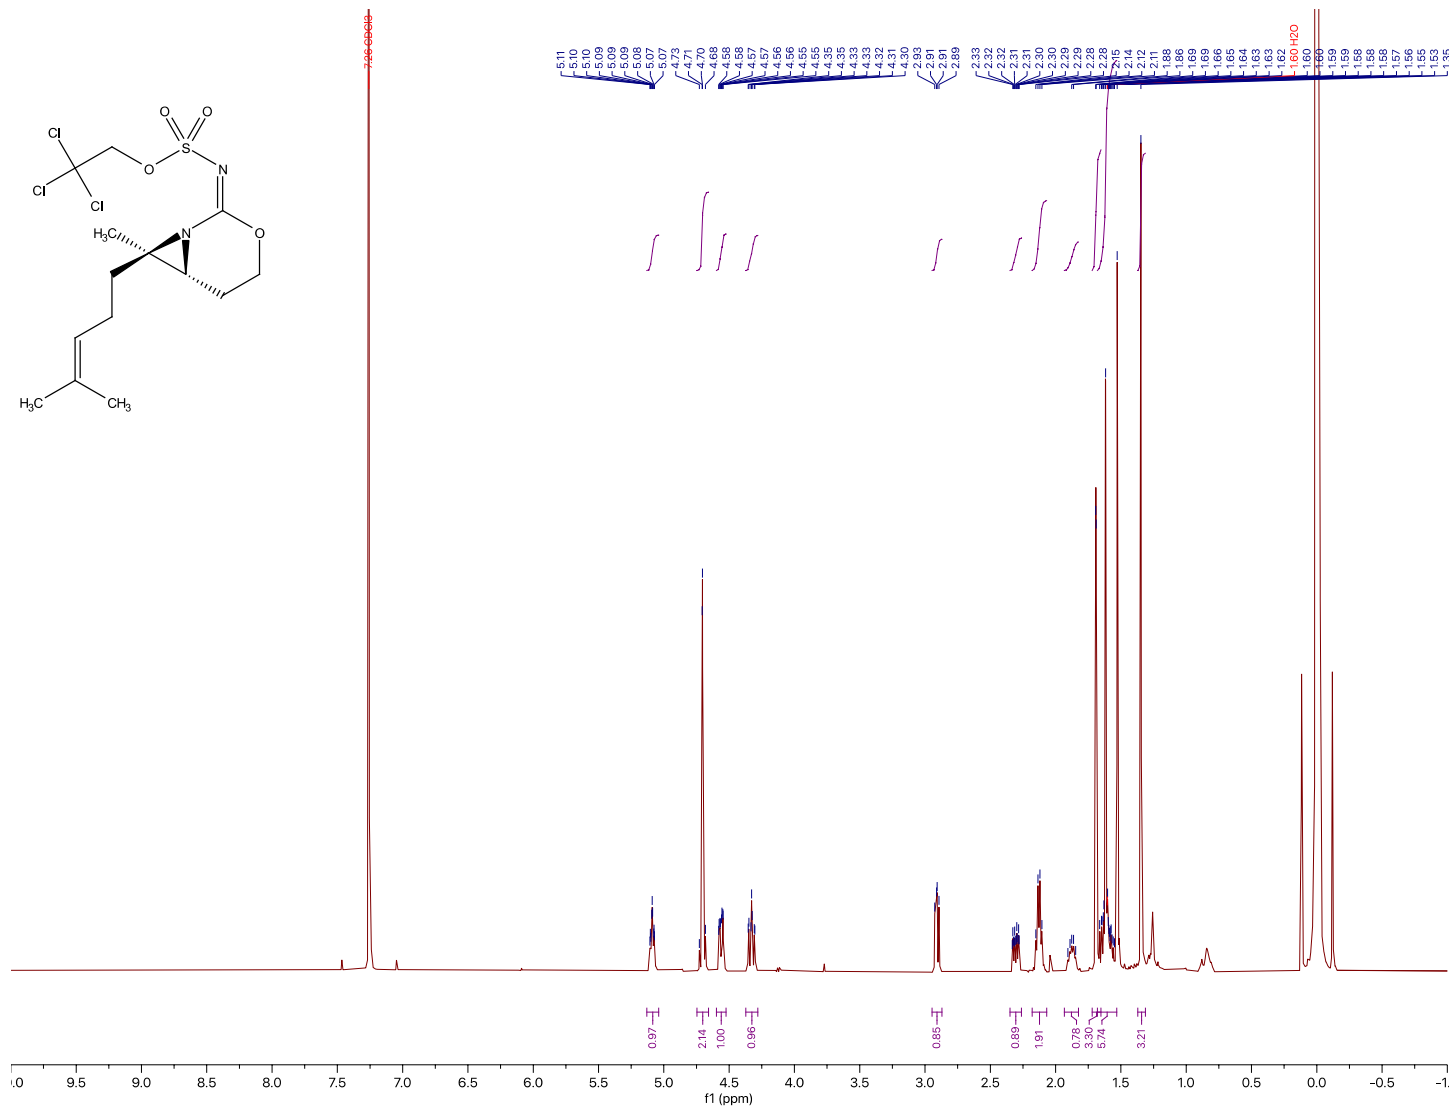

$^{13}\text{C}$  NMR (126 MHz,  $\text{CDCl}_3$ ) for **Compound 2s**

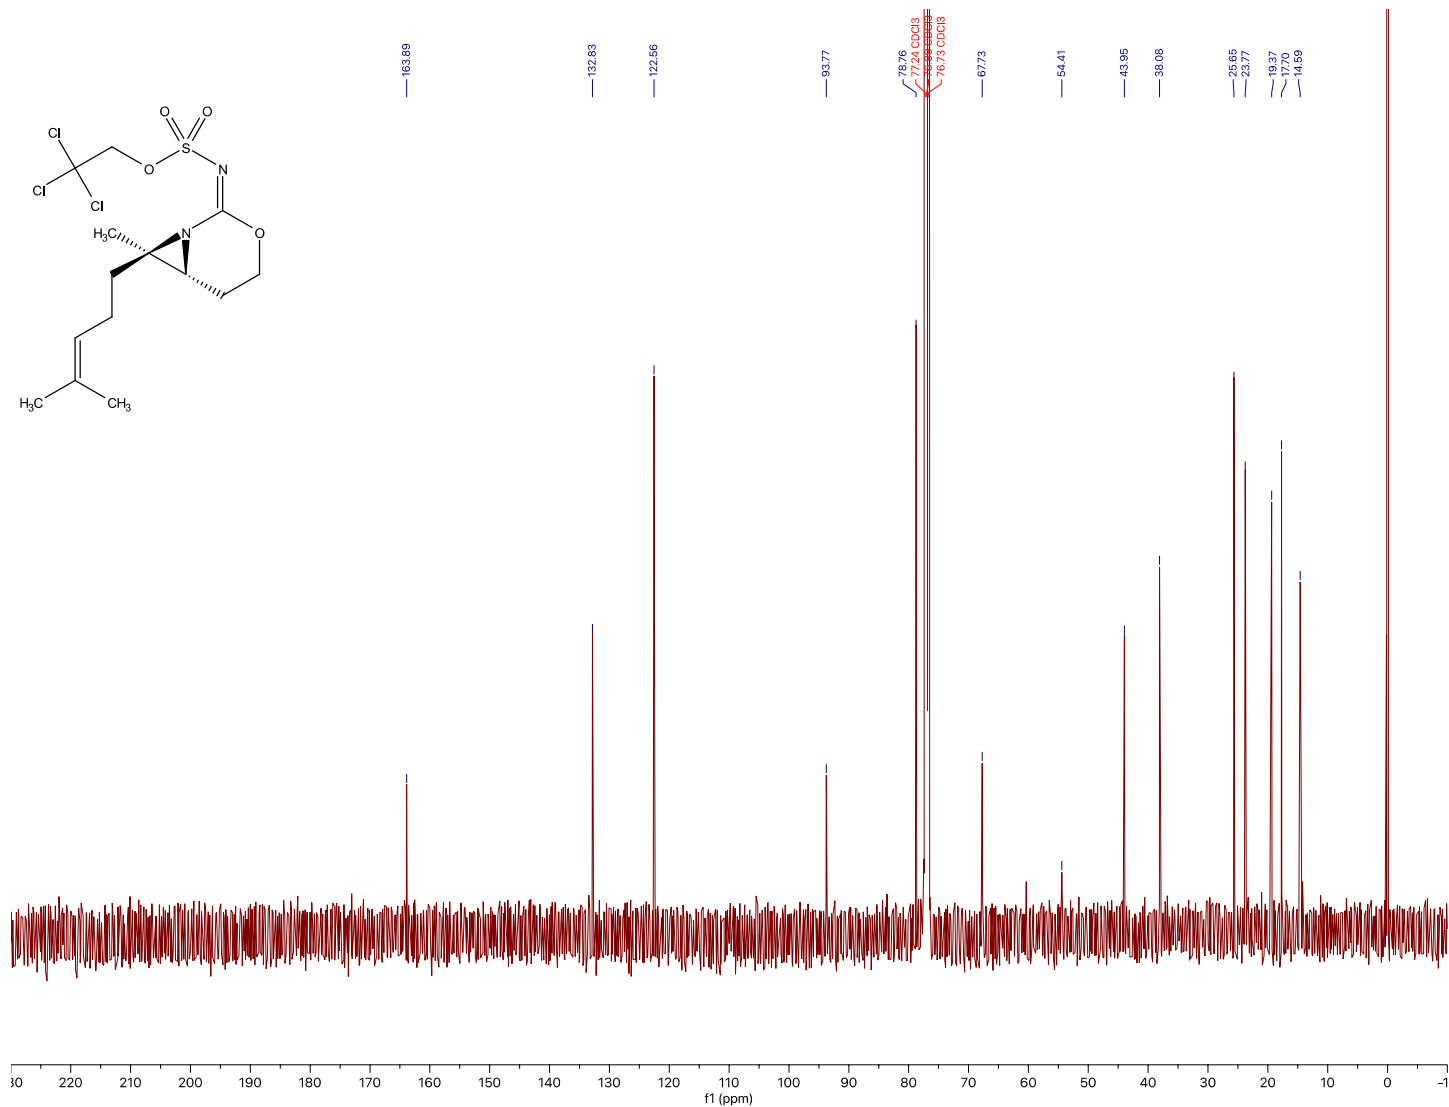

<sup>1</sup>H NMR (500 MHz, CDCl<sub>3</sub>) for Compound 2t

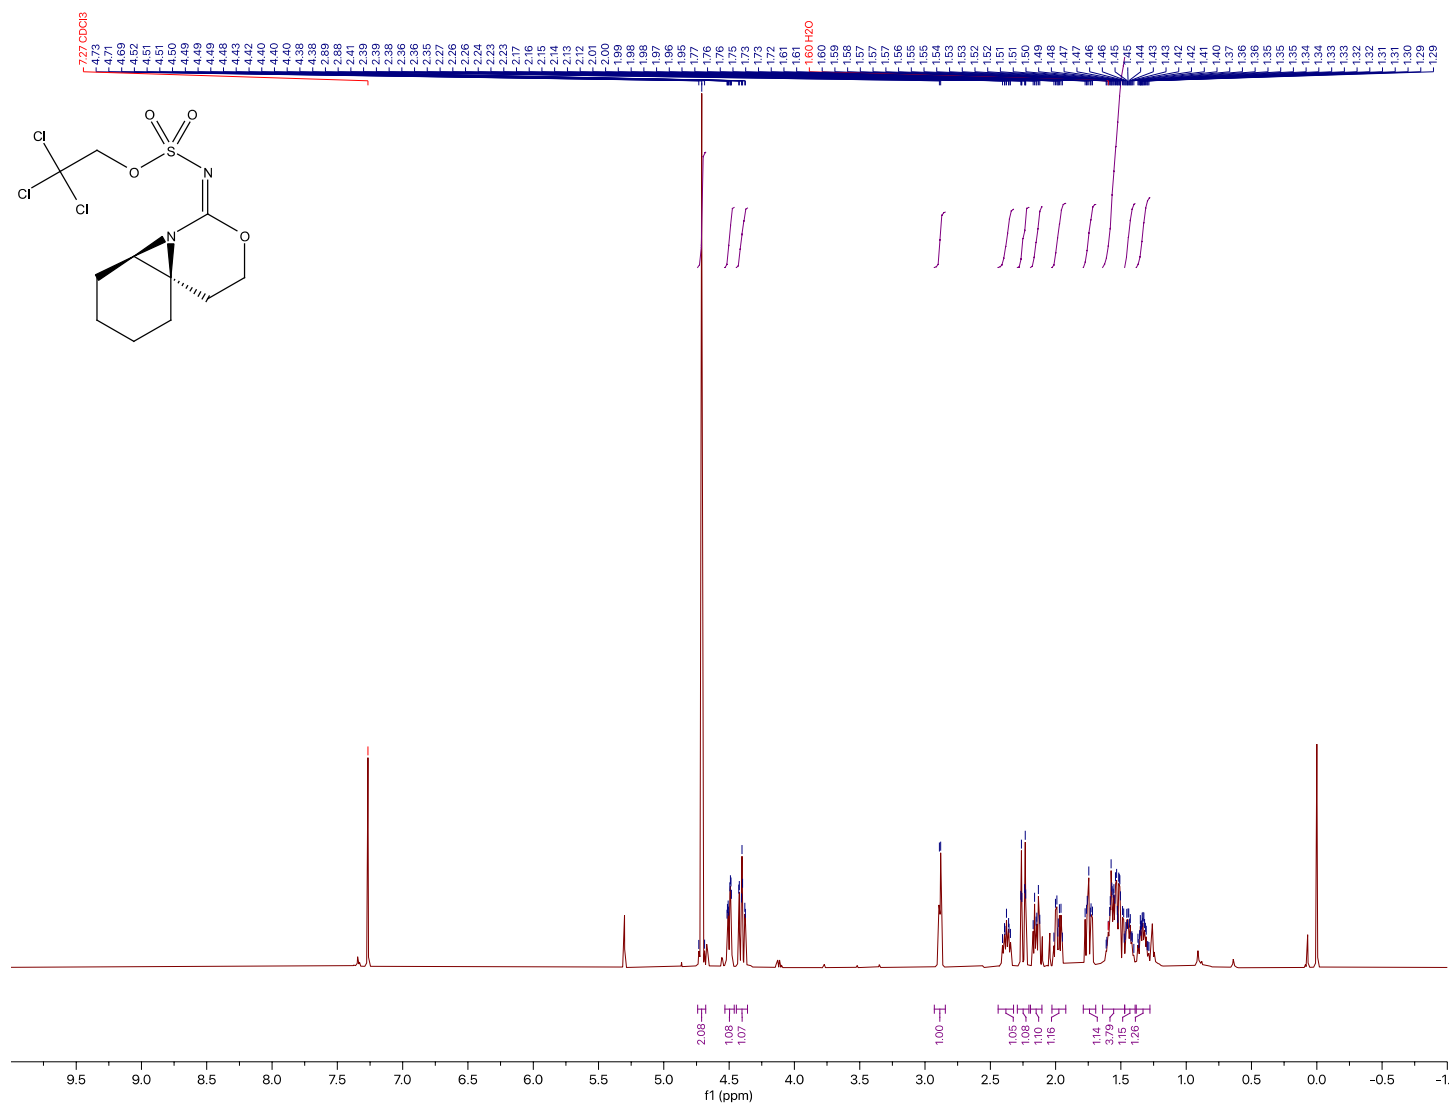



$^{13}\text{C}$  NMR (126 MHz,  $\text{CDCl}_3$ ) for **Compound 2t**

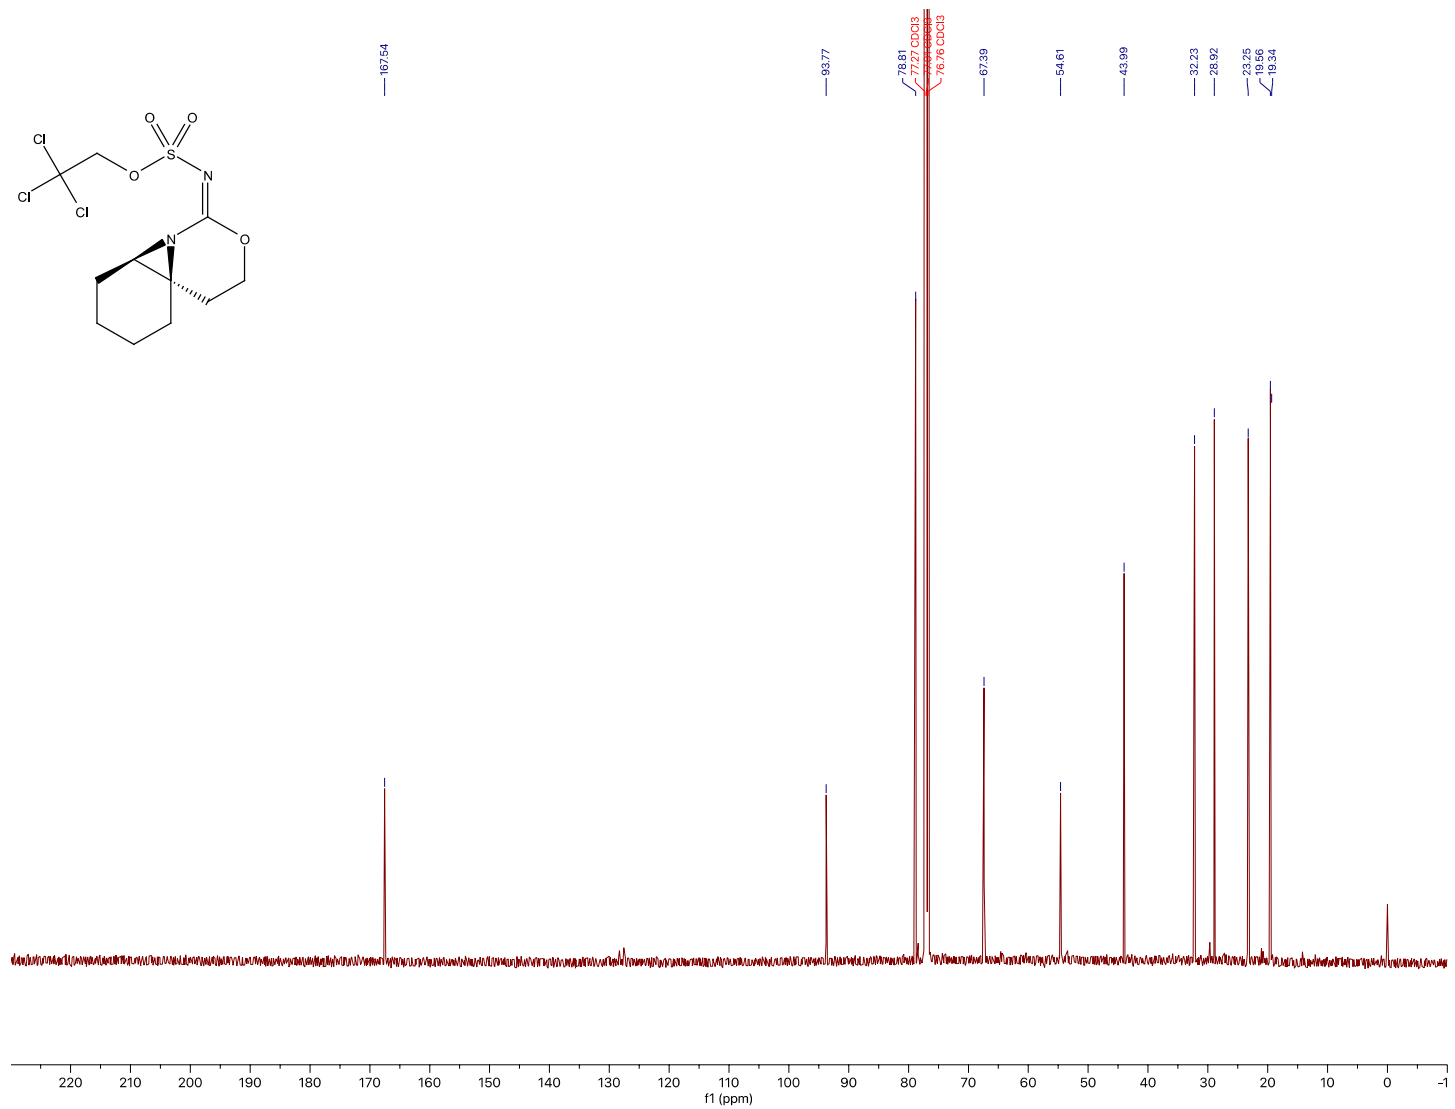

<sup>1</sup>H NMR (500 MHz, CDCl<sub>3</sub>) for Compound 2u

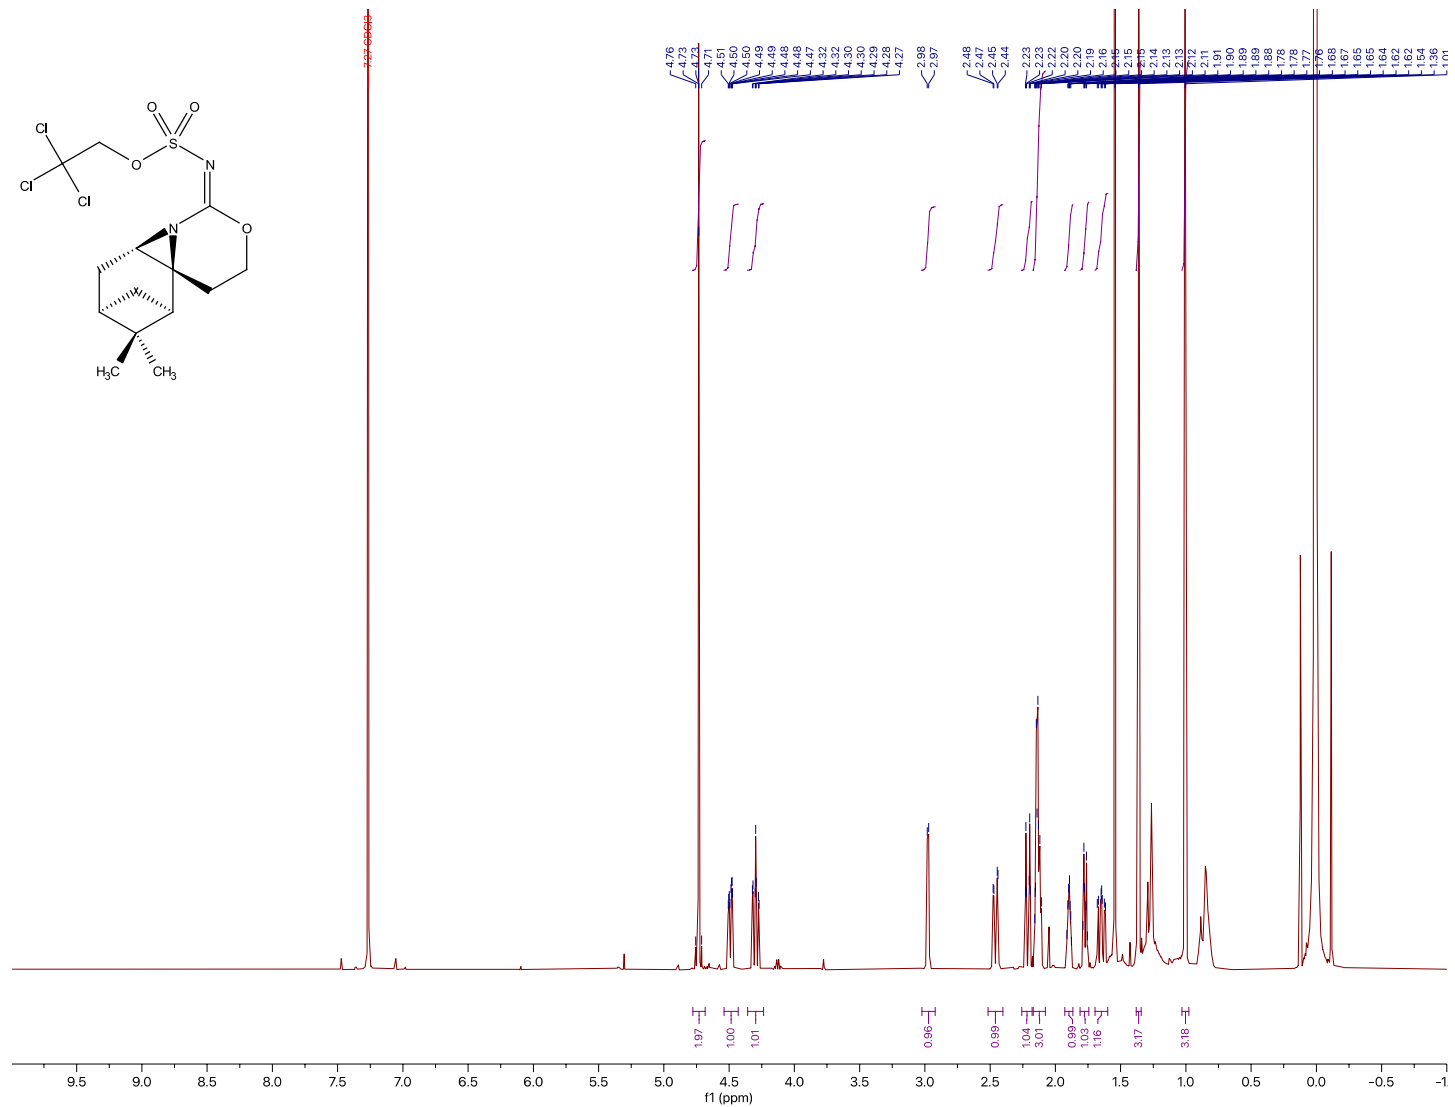

$^{13}\text{C}$  NMR (126 MHz,  $\text{CDCl}_3$ ) for **Compound 2u**

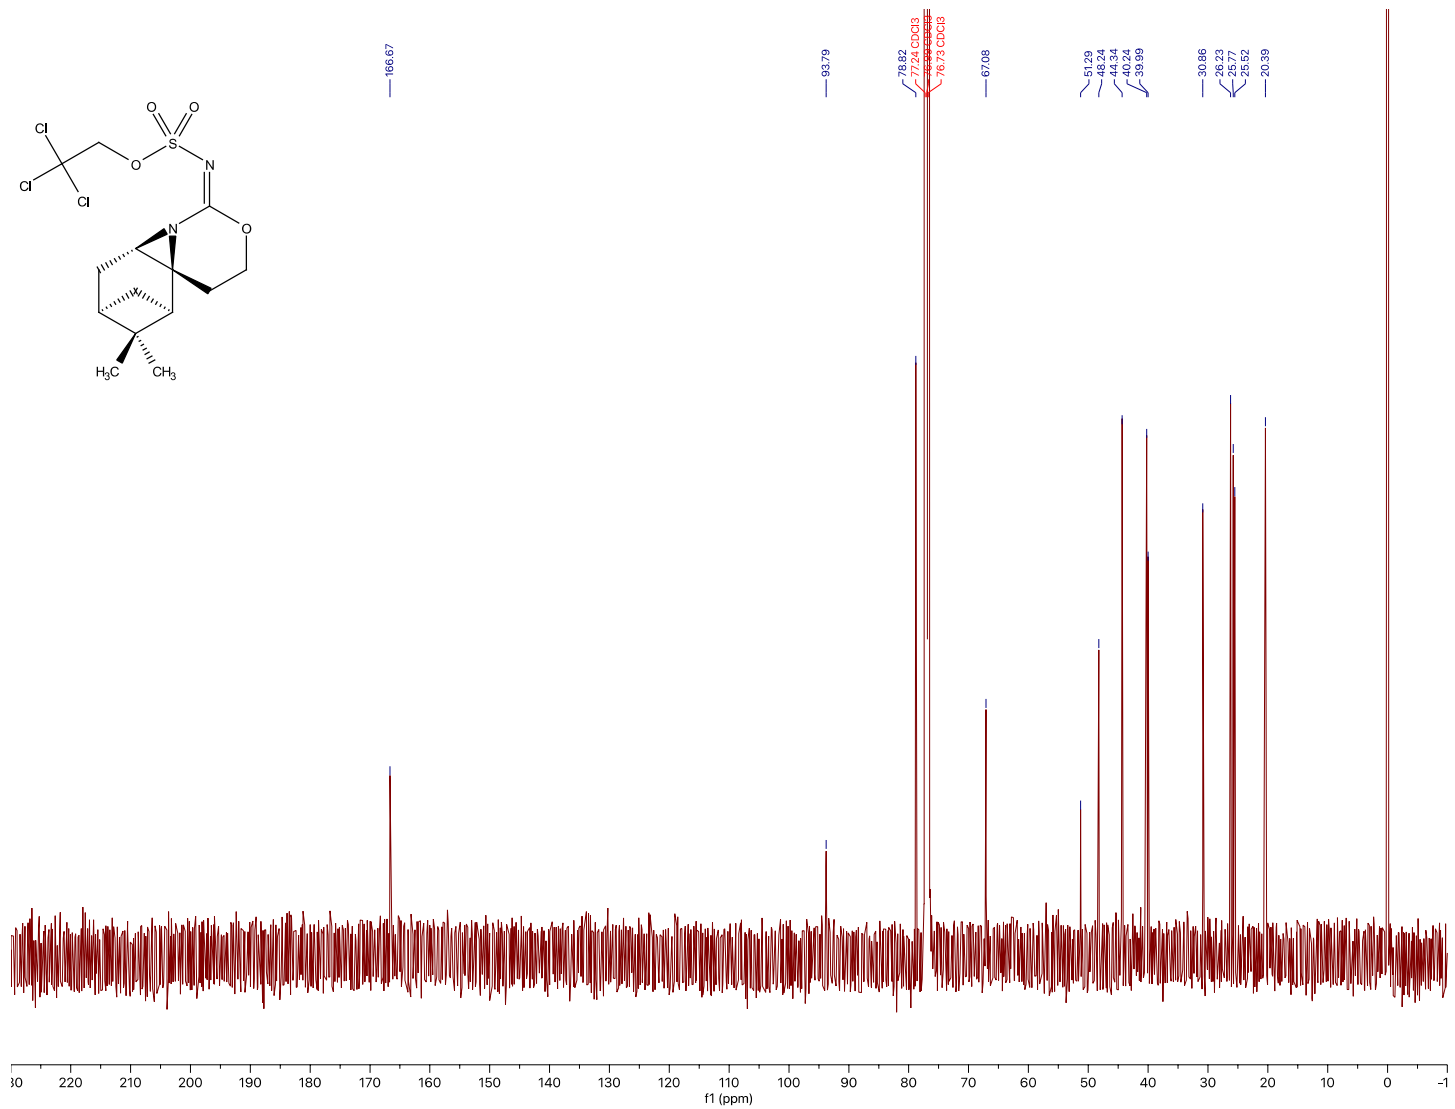

NOESY NMR (500 MHz, CDCl<sub>3</sub>) for **Compound 2u**

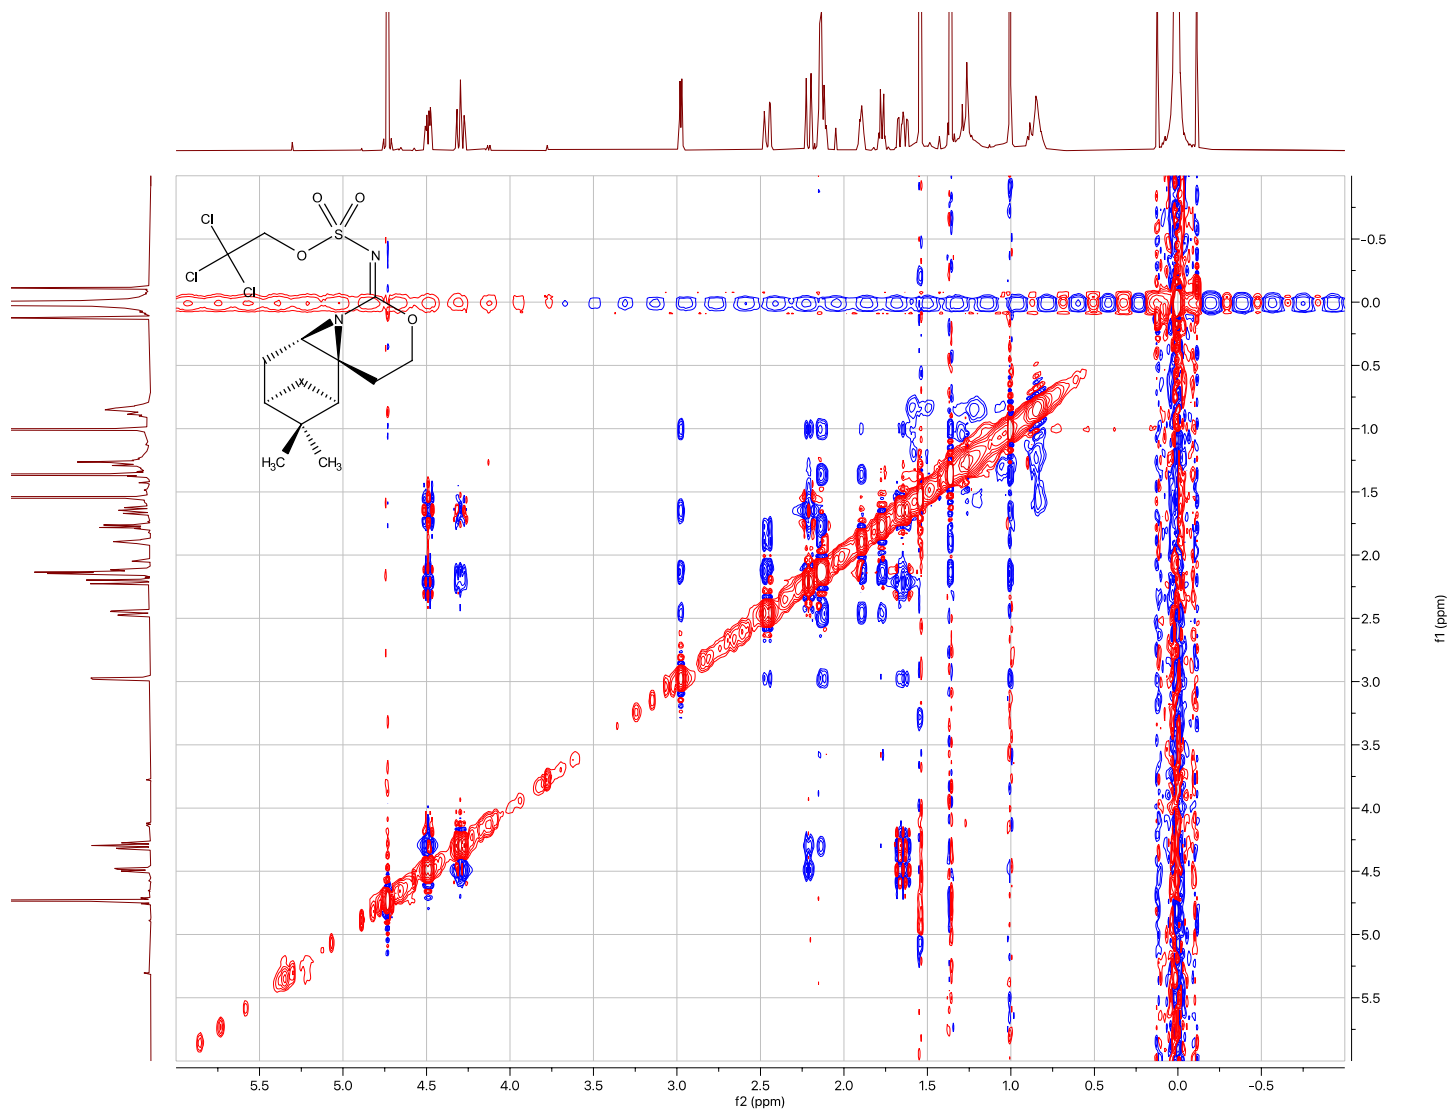

<sup>1</sup>H NMR (500 MHz, CDCl<sub>3</sub>) for Compound 2v

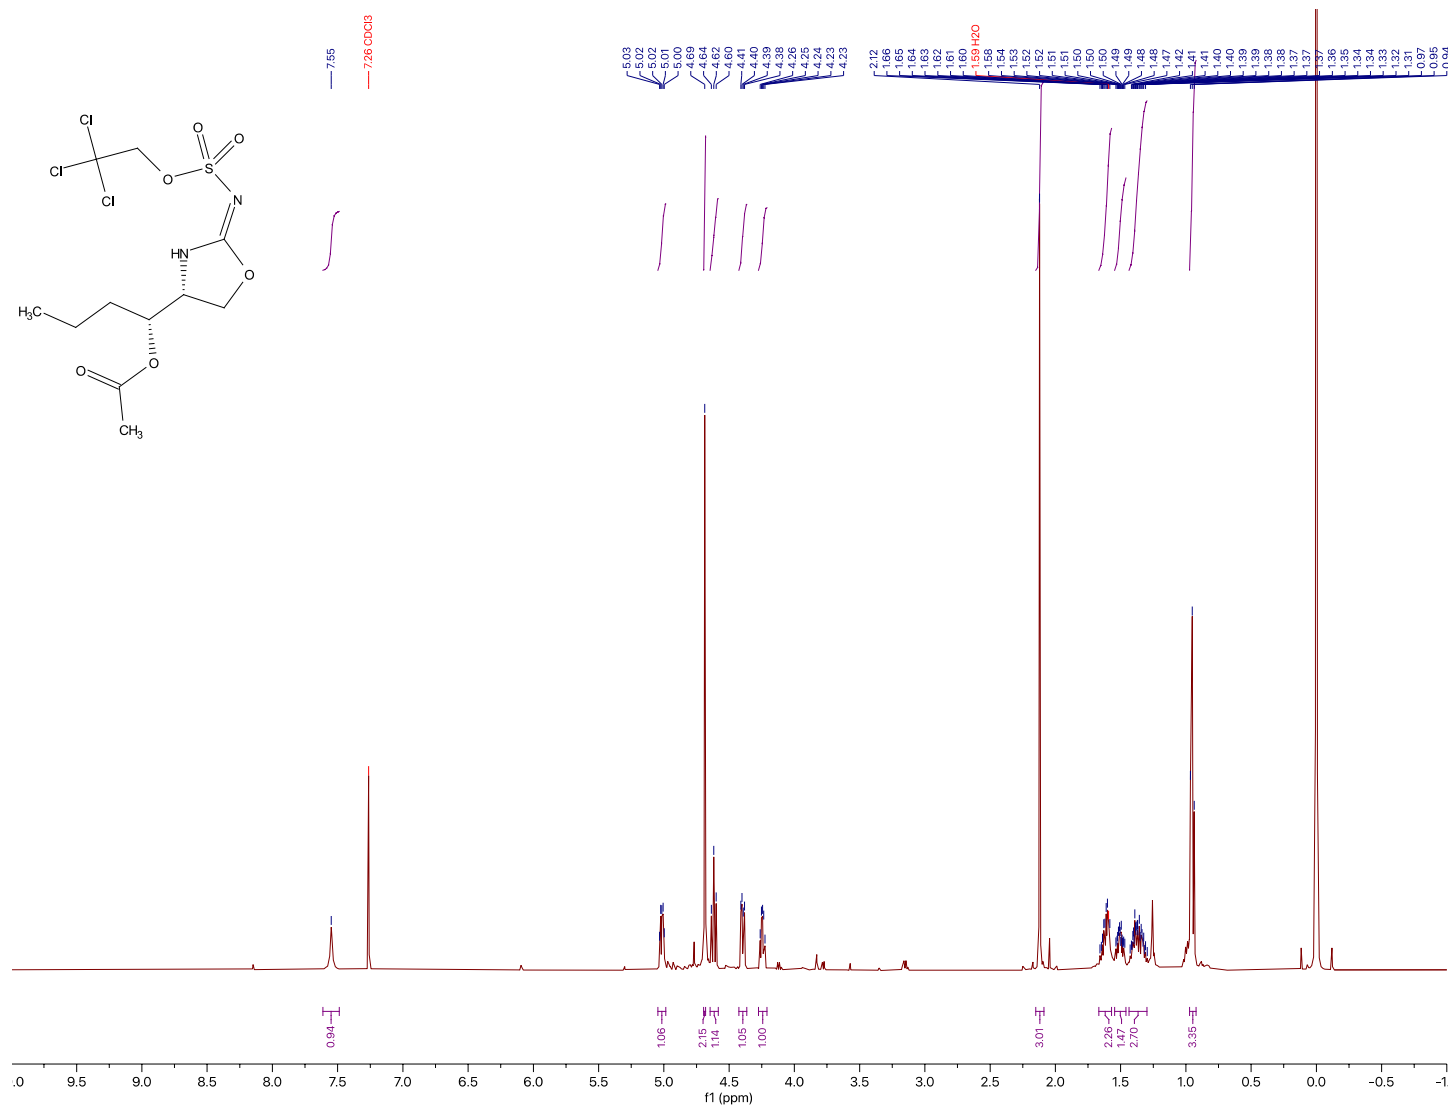



<sup>1</sup>H NMR (500 MHz, CDCl<sub>3</sub>) for **Compound 2w** and **2w'**

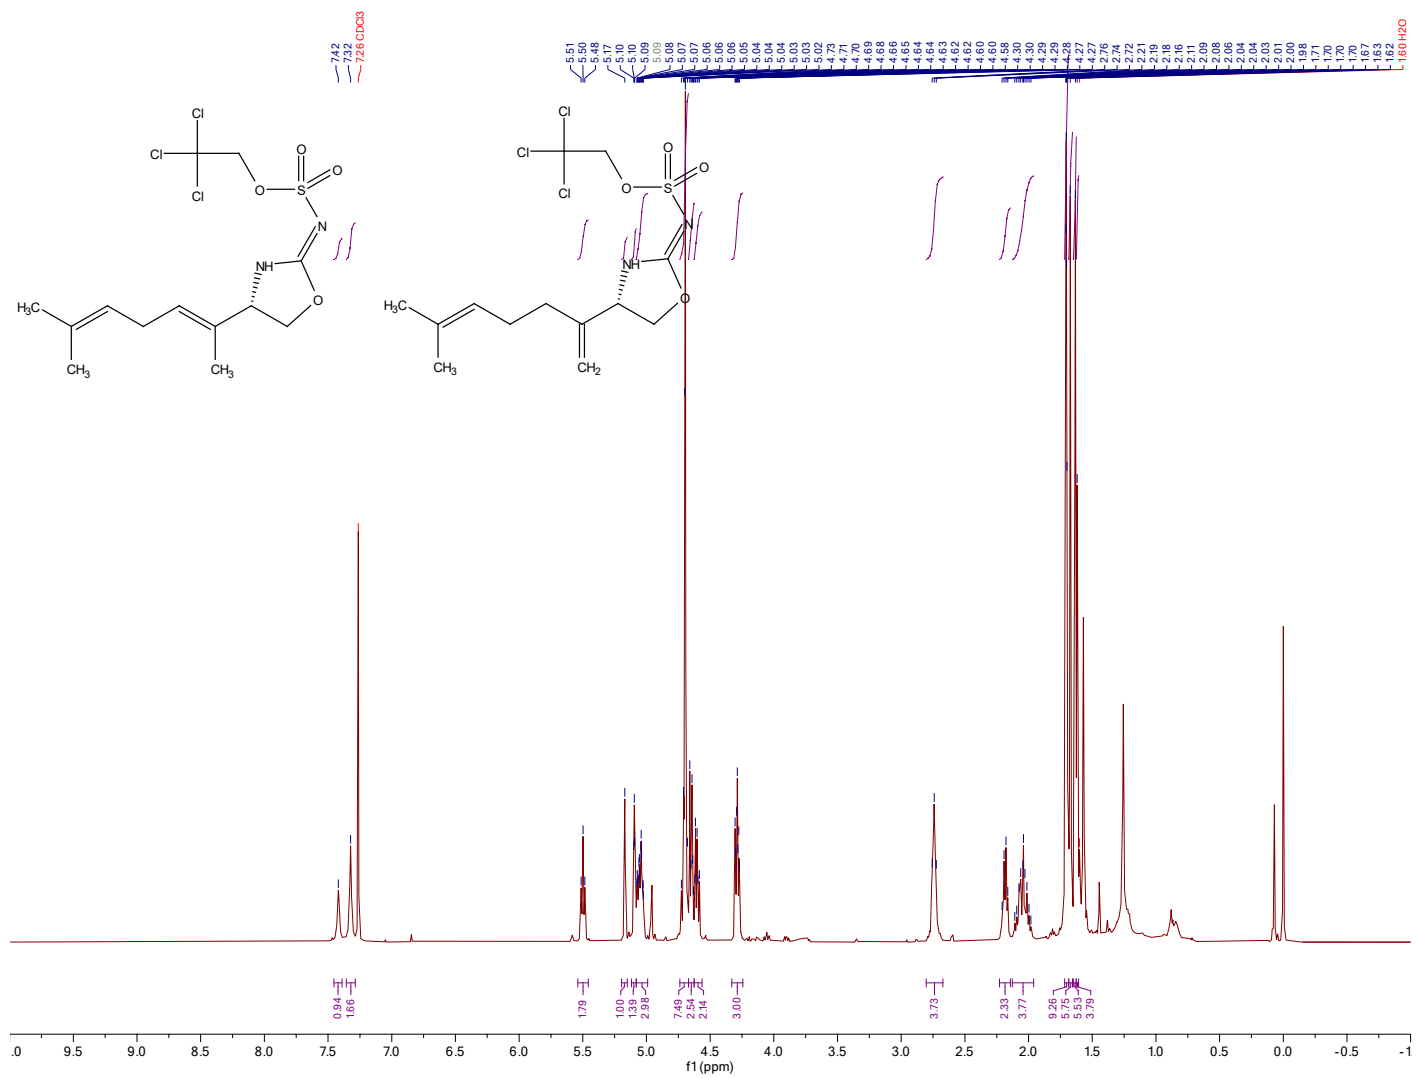

$^{13}\text{C}$  NMR (126 MHz,  $\text{CDCl}_3$ ) for **Compounds 2w** and **2w'**

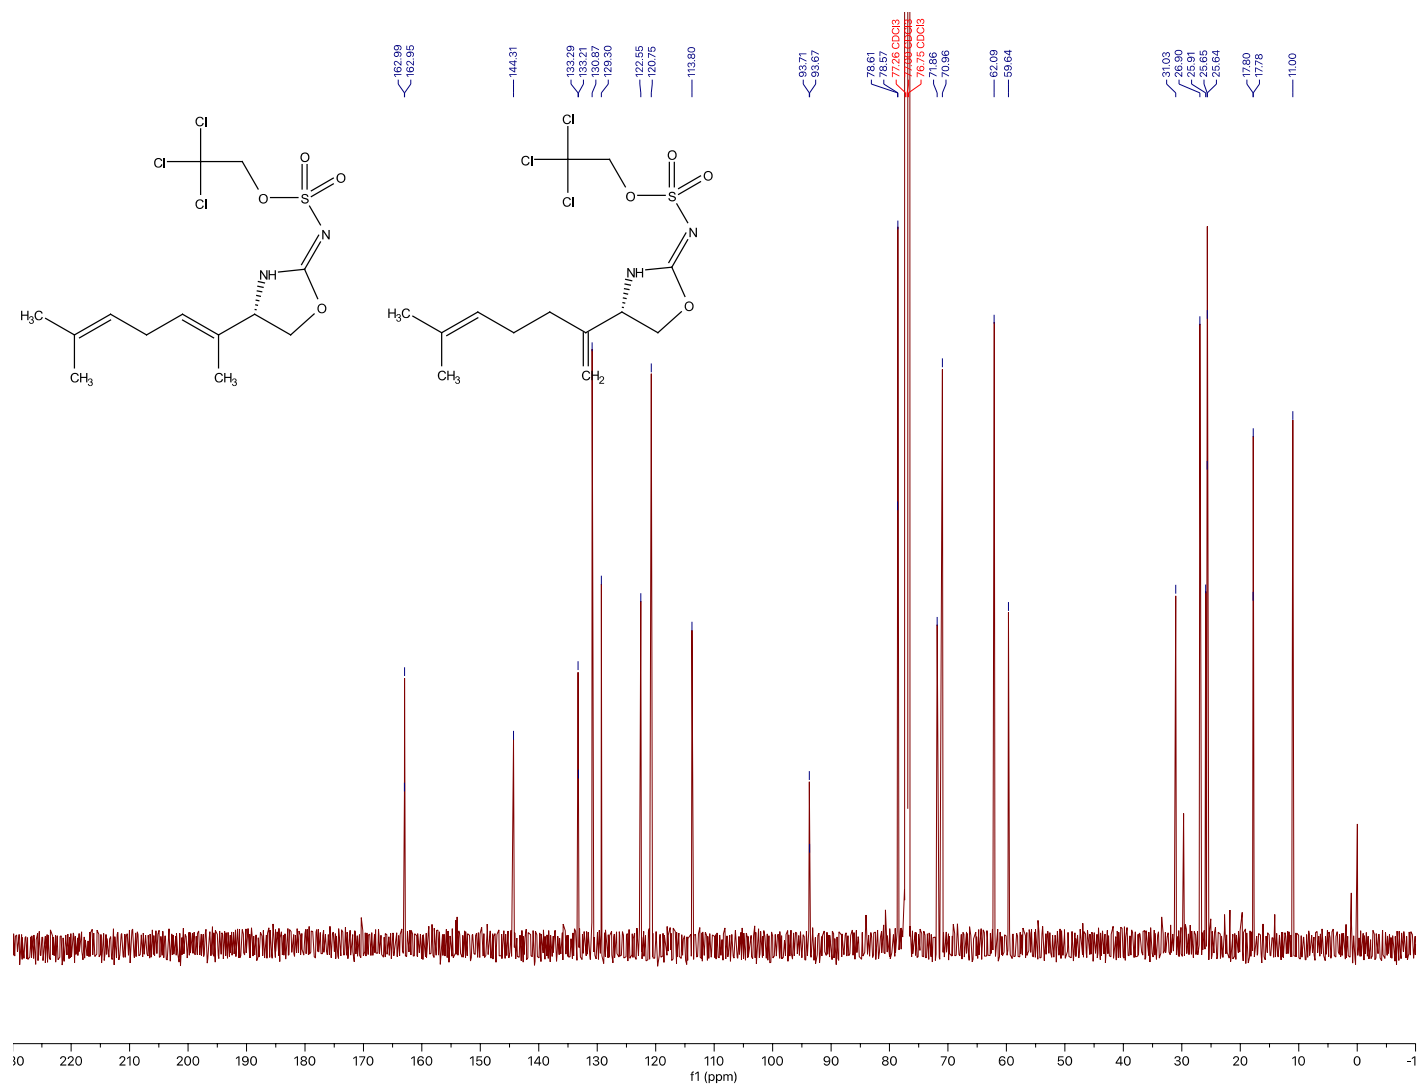



COSY NMR (500 MHz, CDCl<sub>3</sub>) for **Compounds 2w** and **2w'**

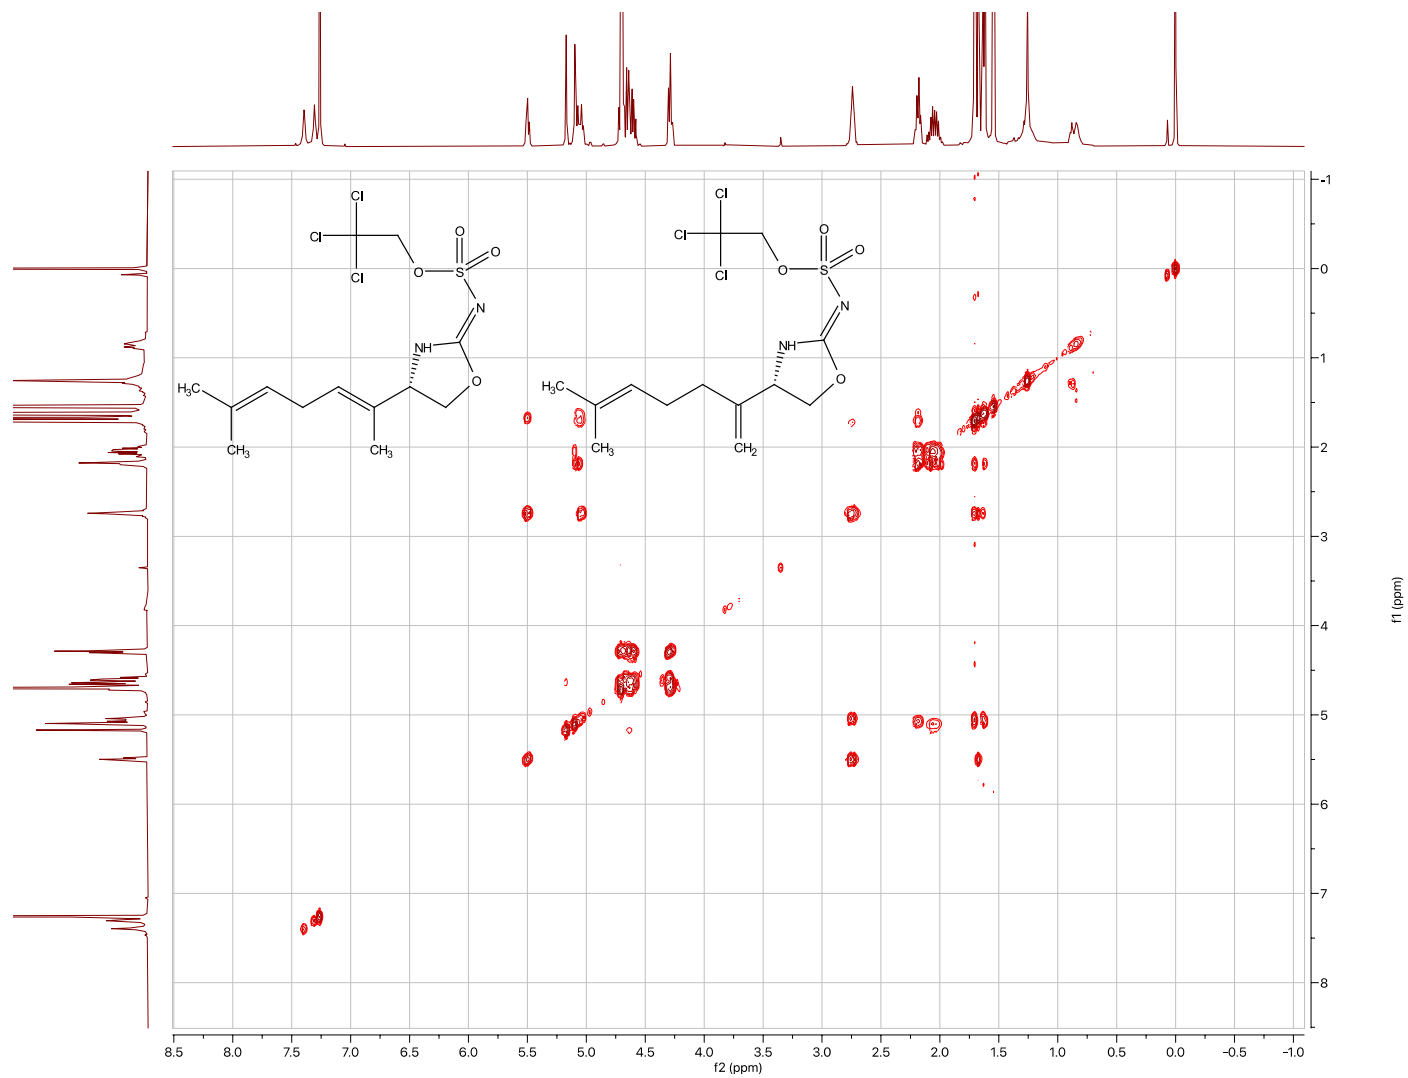

HSQC NMR (500 MHz/126 MHz, CDCl<sub>3</sub>) for **Compounds 2w** and **2w'**

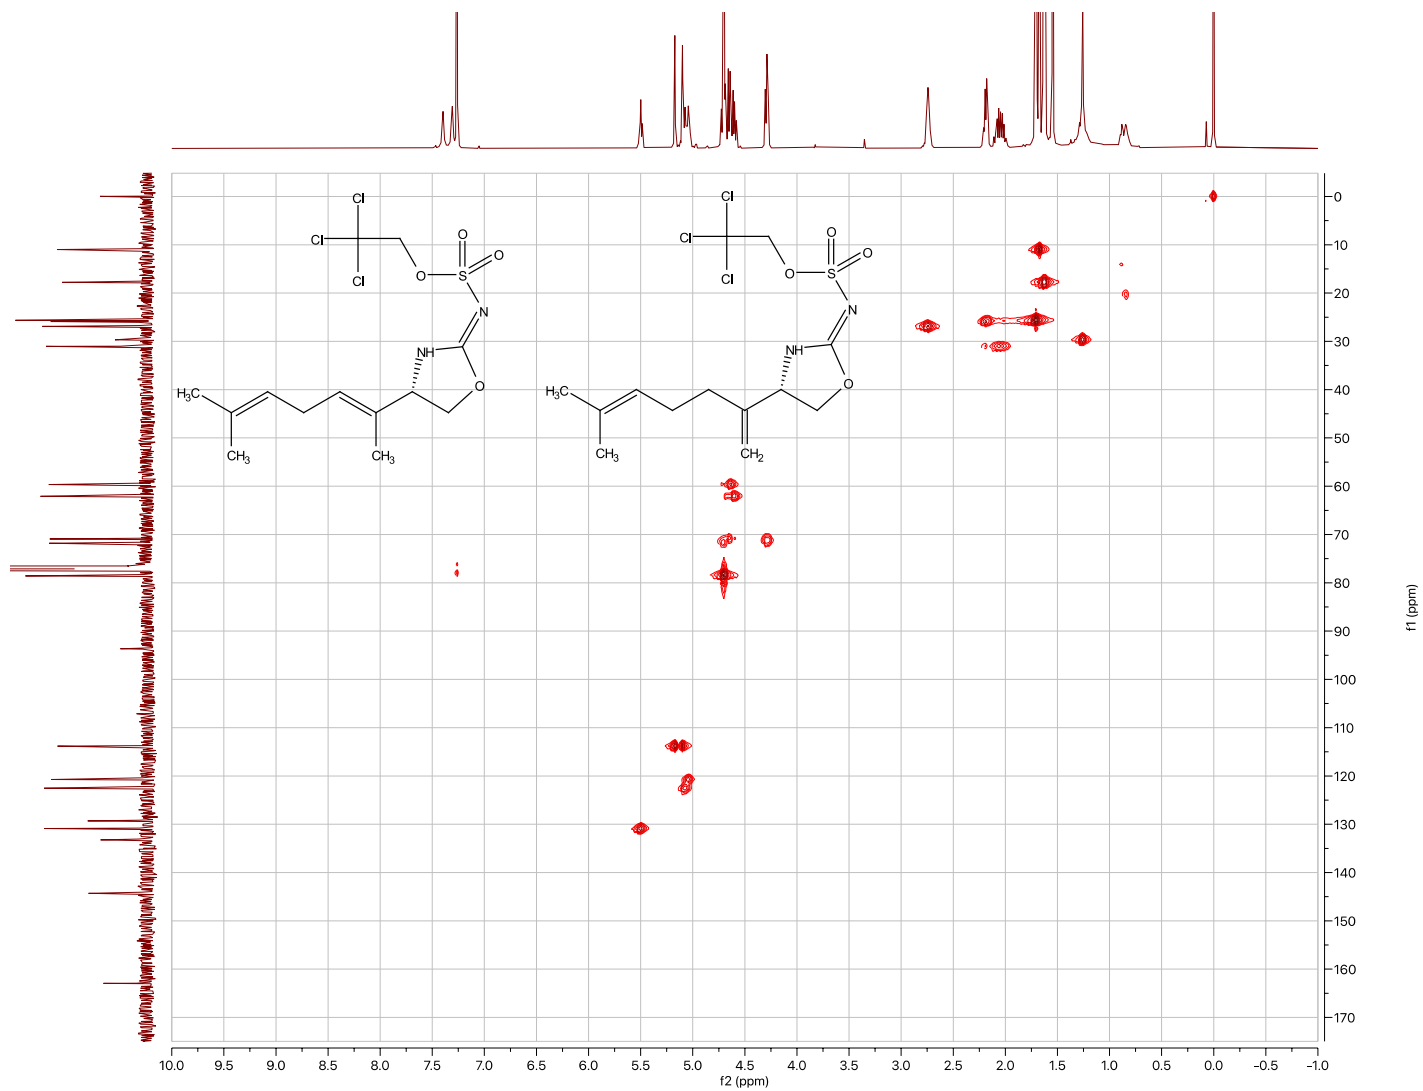

HMBC NMR (500 MHz/126 MHz, CDCl<sub>3</sub>) for **Compounds 2w** and **2w'**

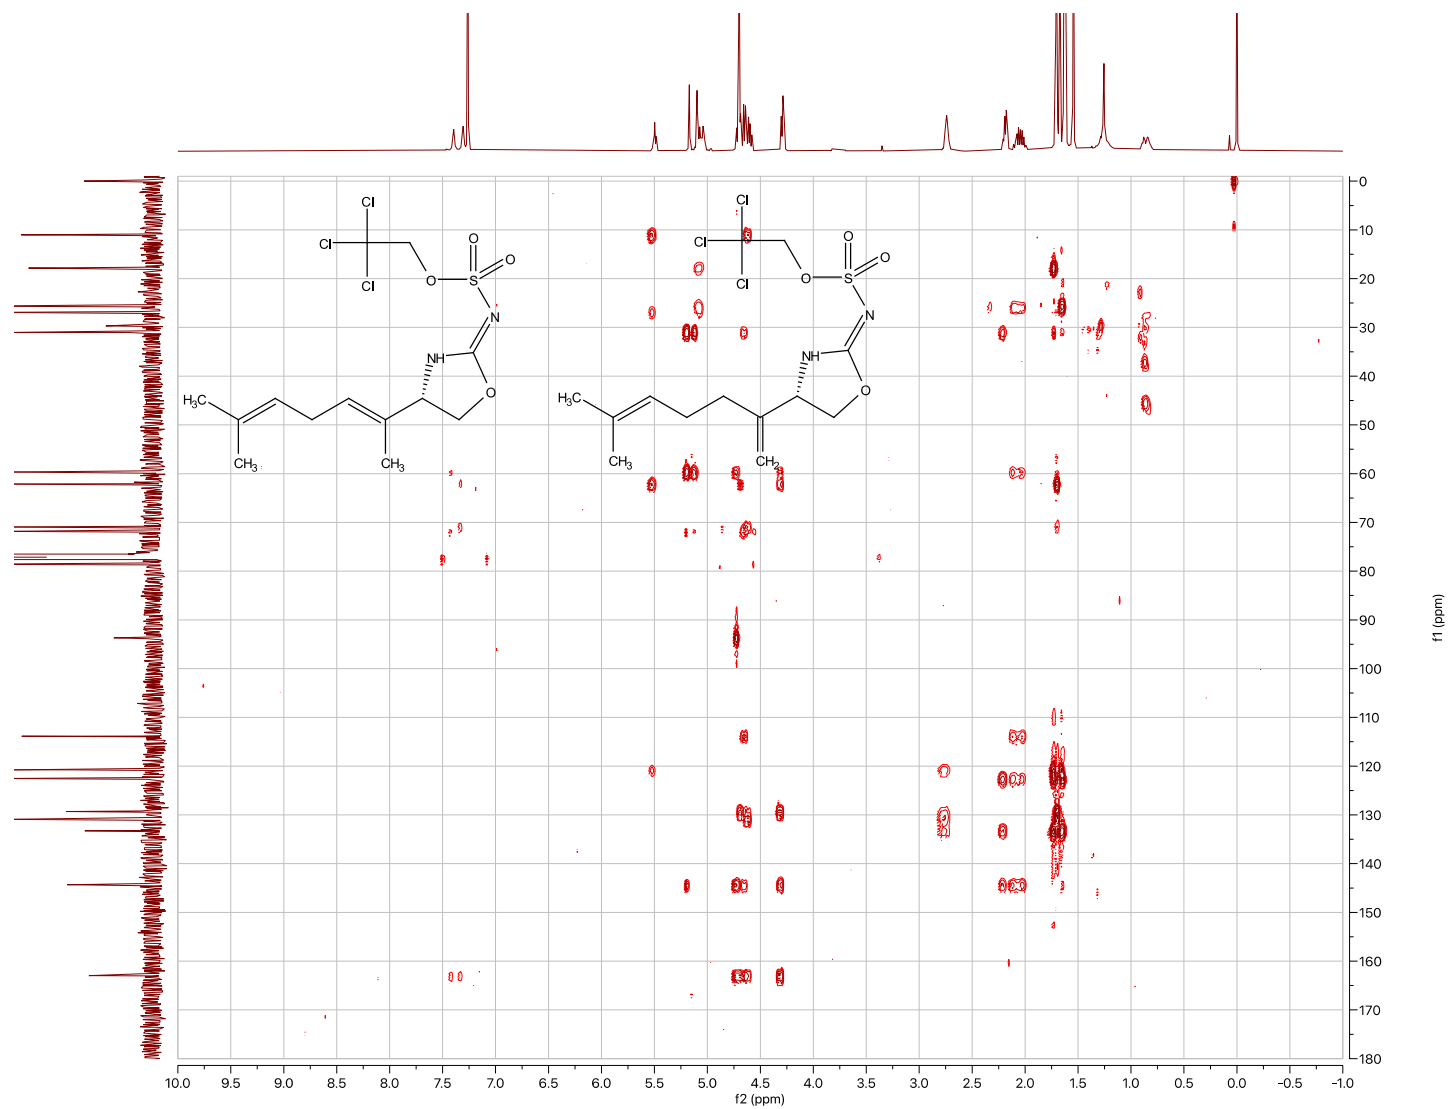

<sup>1</sup>H NMR (500 MHz, CDCl<sub>3</sub>) for **Compound 2x**

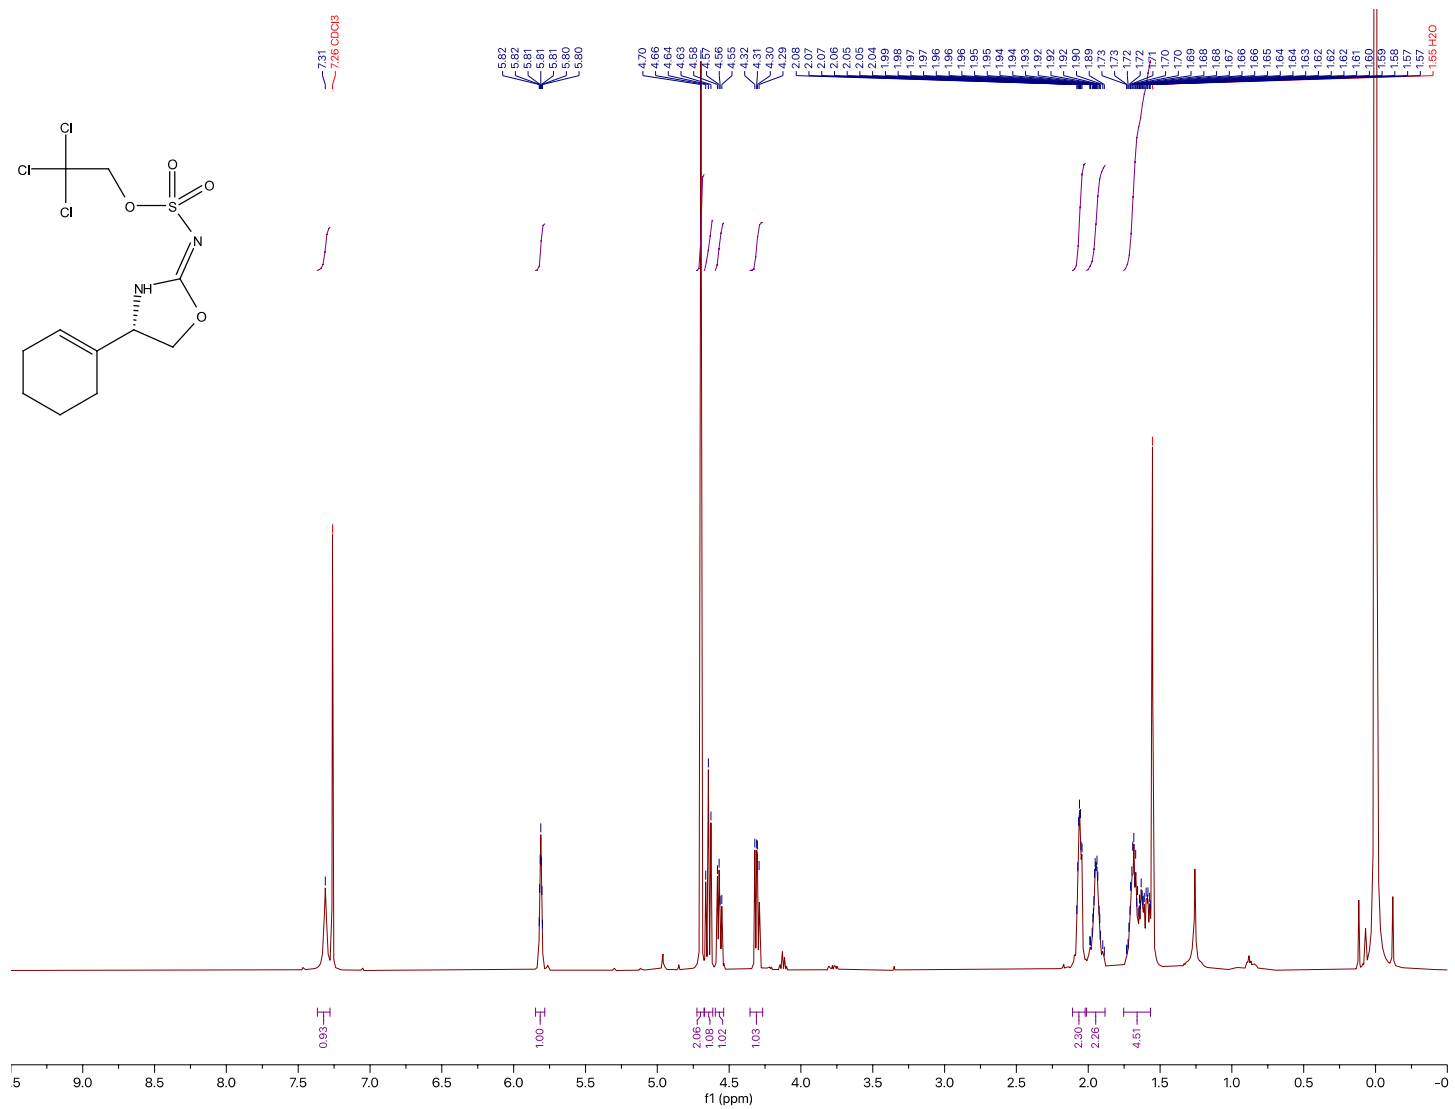

$^{13}\text{C}$  NMR (126 MHz,  $\text{CDCl}_3$ ) for **Compound 2x**

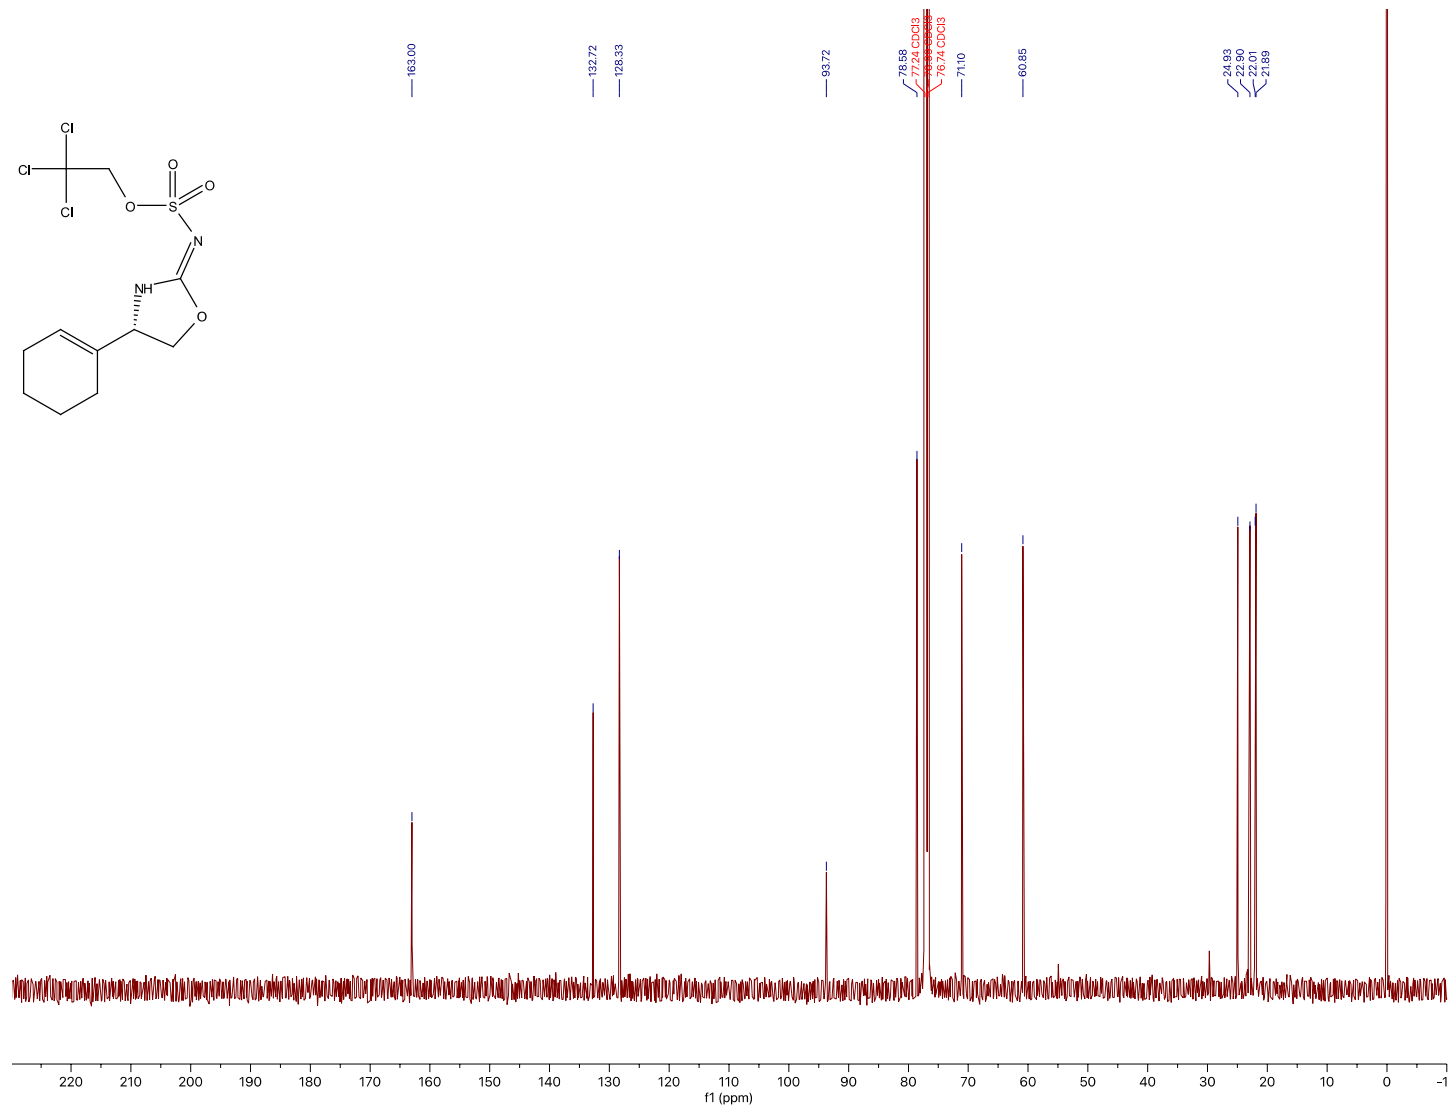

<sup>1</sup>H NMR (500 MHz, CDCl<sub>3</sub>) for **Compound 3**

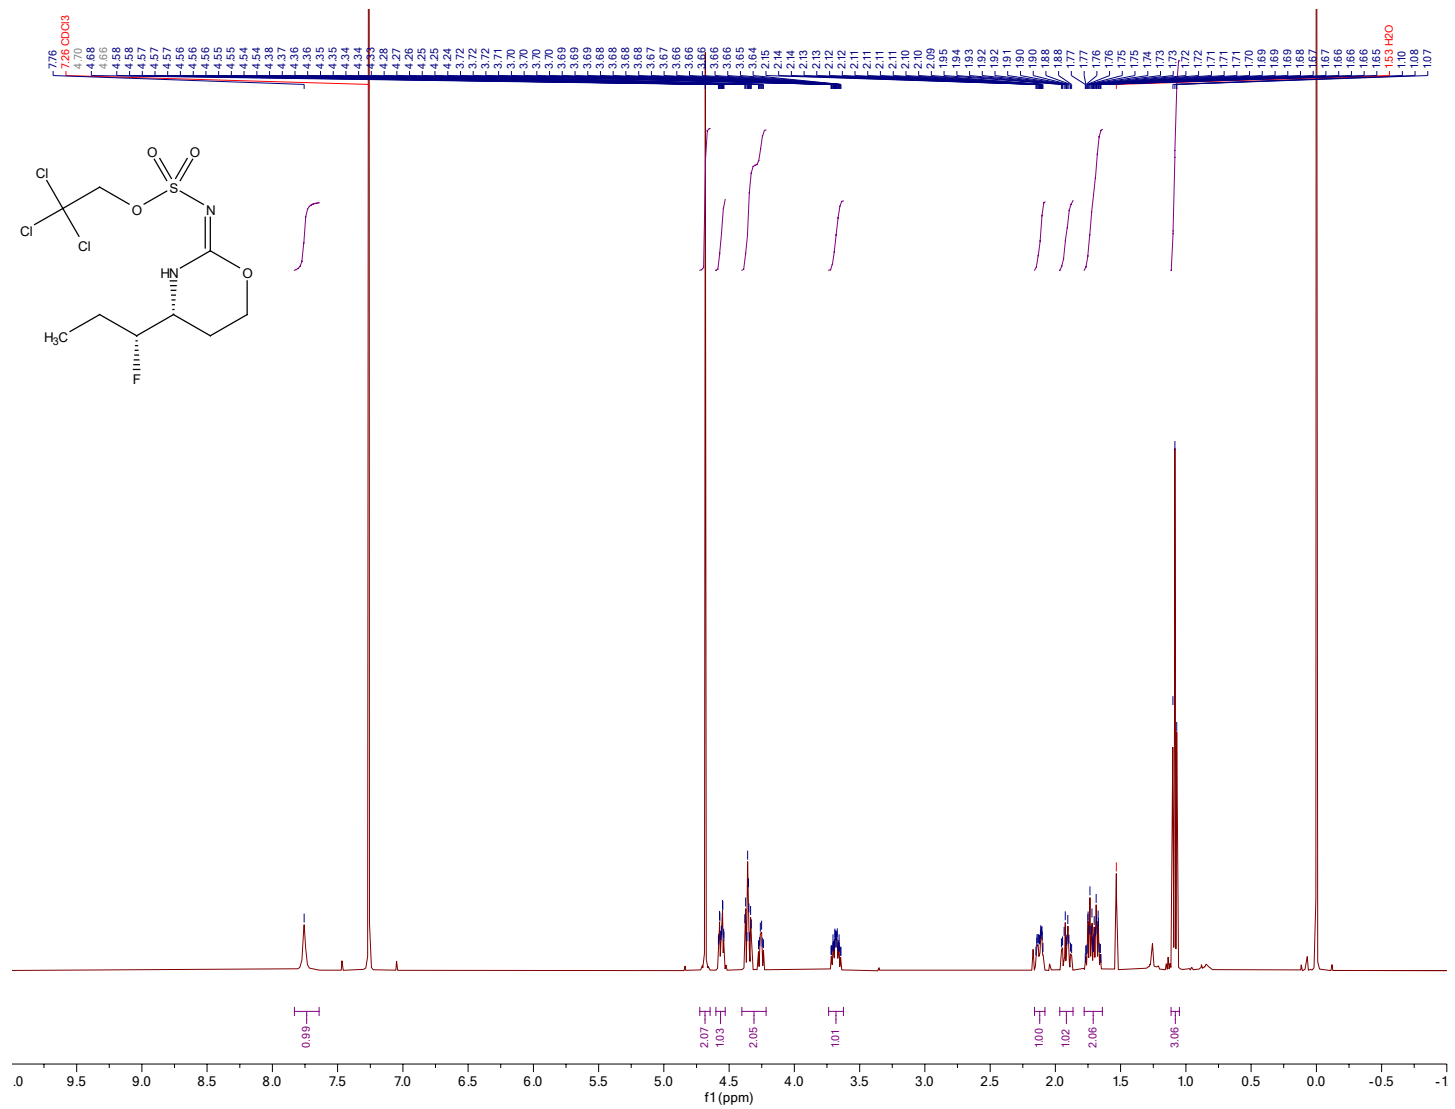

$^{13}\text{C}$  NMR (126 MHz,  $\text{CDCl}_3$ ) for **Compound 3**

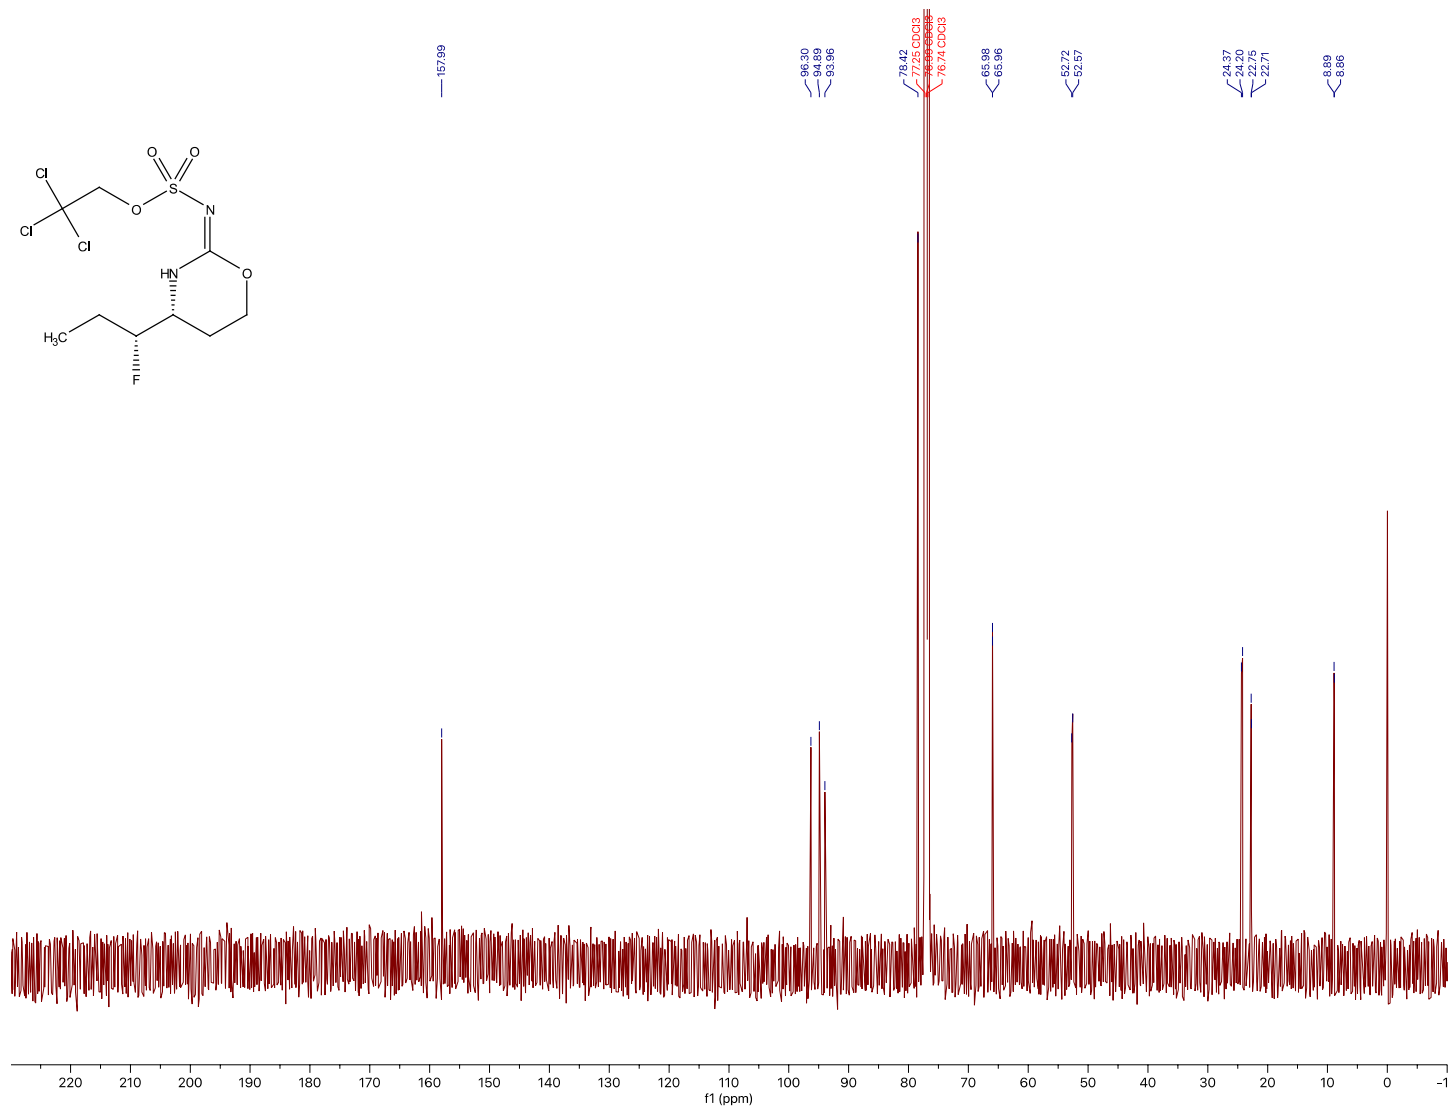

$^{19}\text{F}$  NMR (377 MHz,  $\text{CDCl}_3$ ) for **Compound 3**

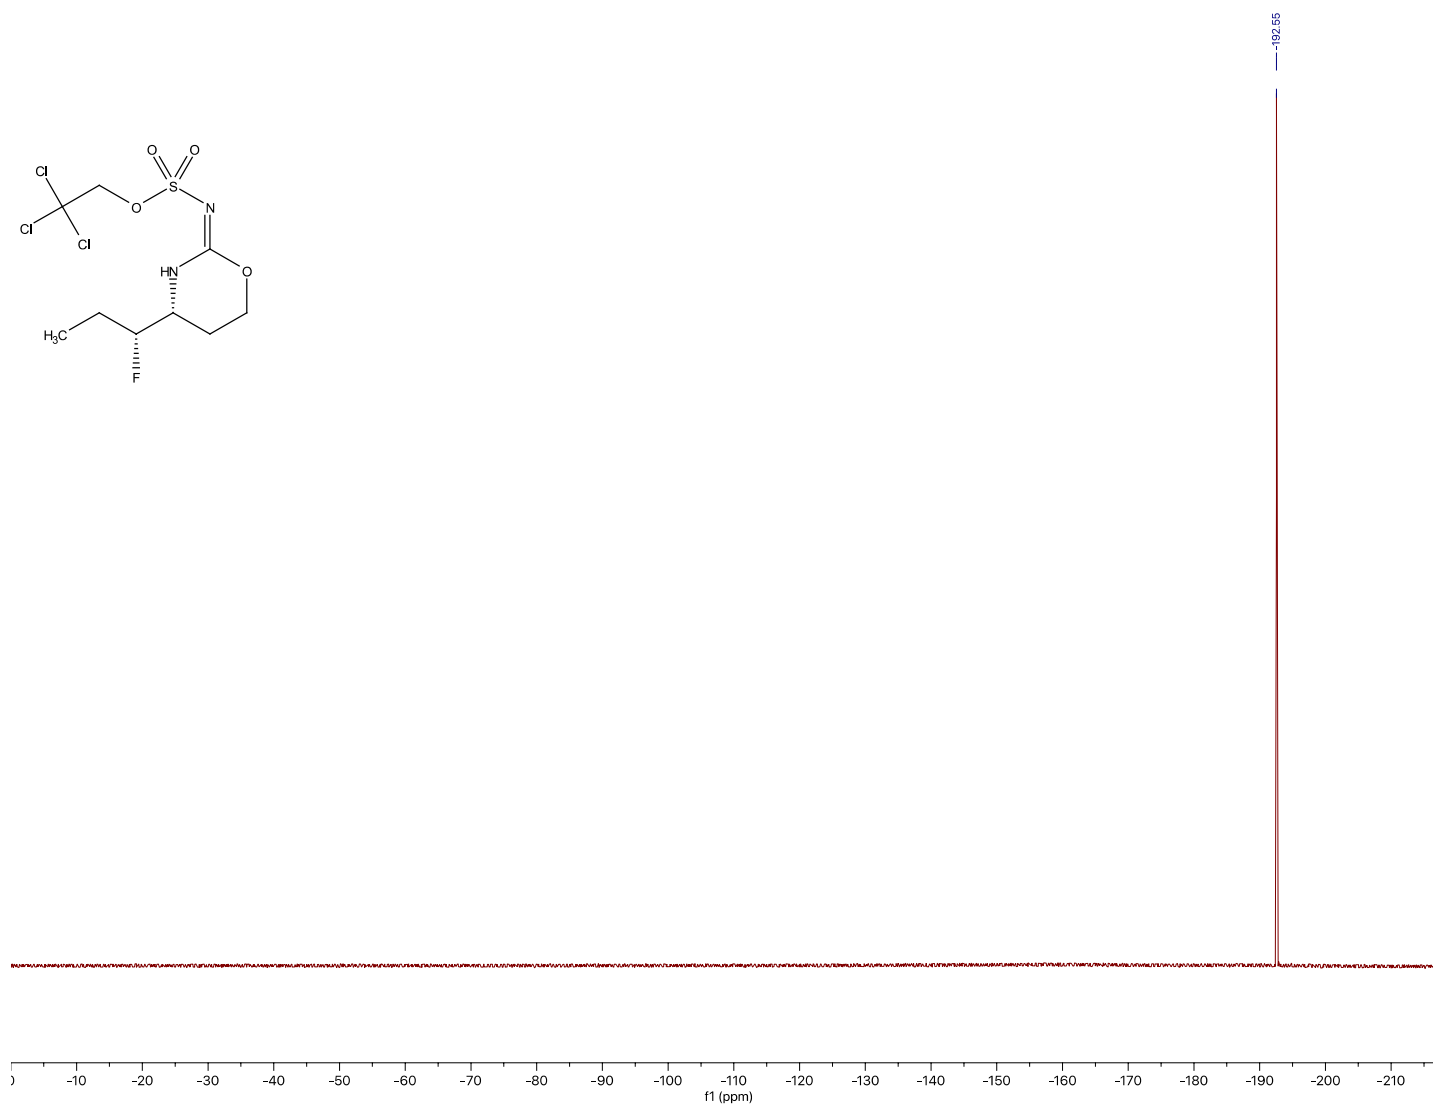



<sup>1</sup>H NMR (500 MHz, CDCl<sub>3</sub>) for **Compound 4**

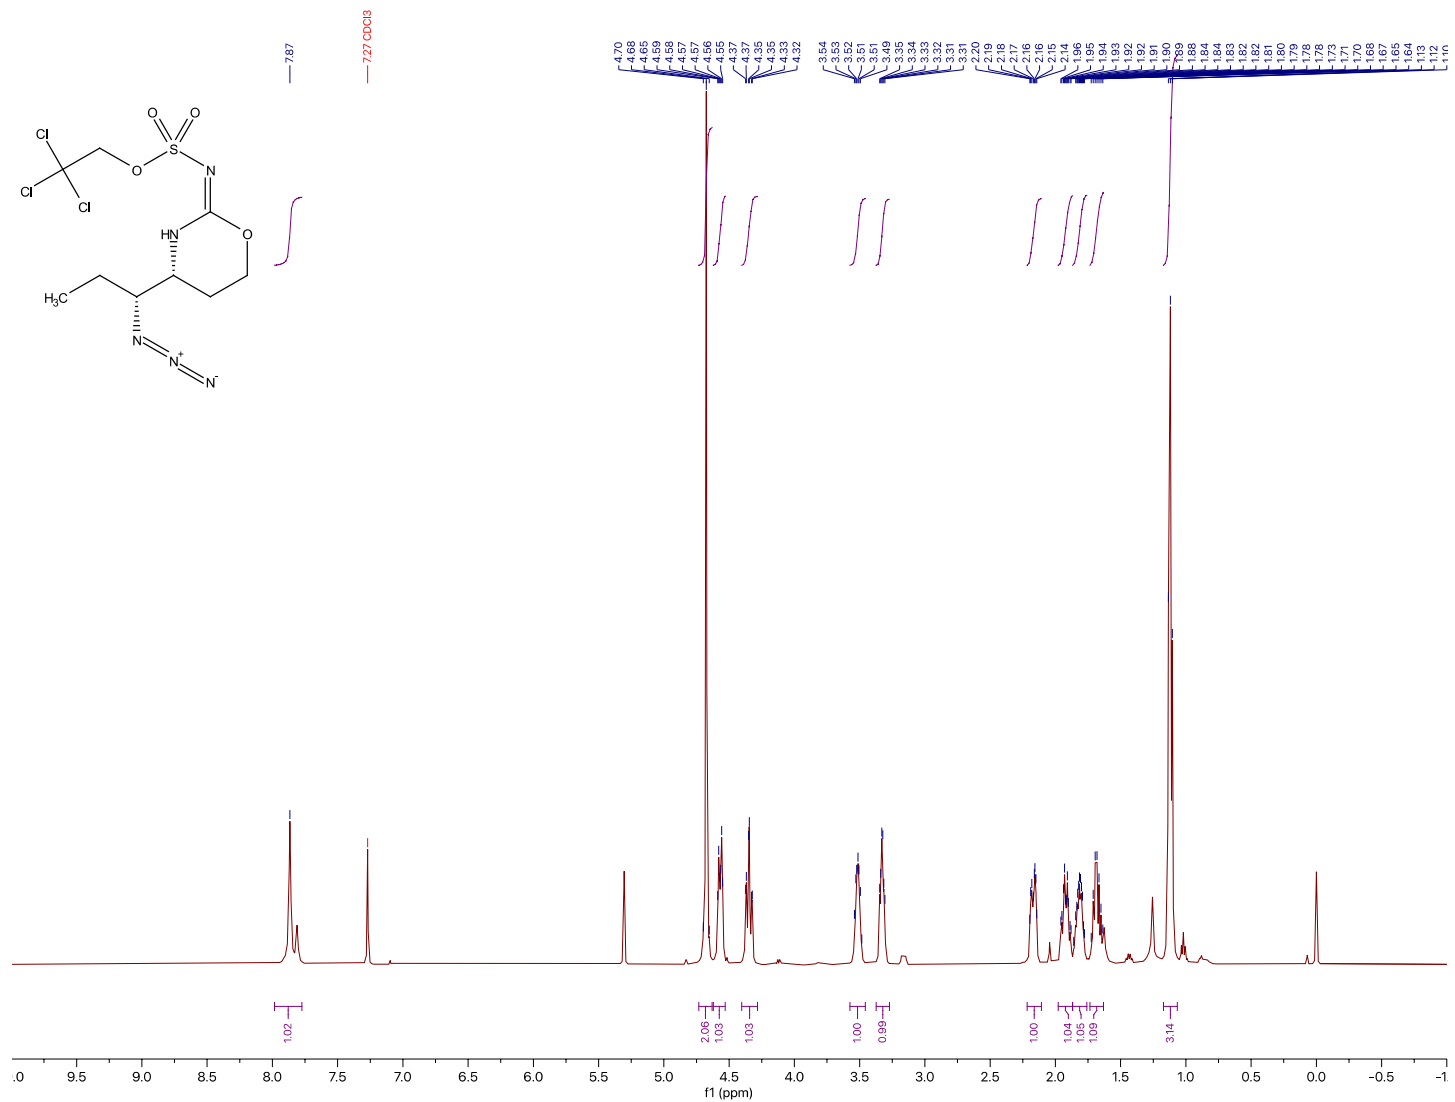

$^{13}\text{C}$  NMR (126 MHz,  $\text{CDCl}_3$ ) for **Compound 4**

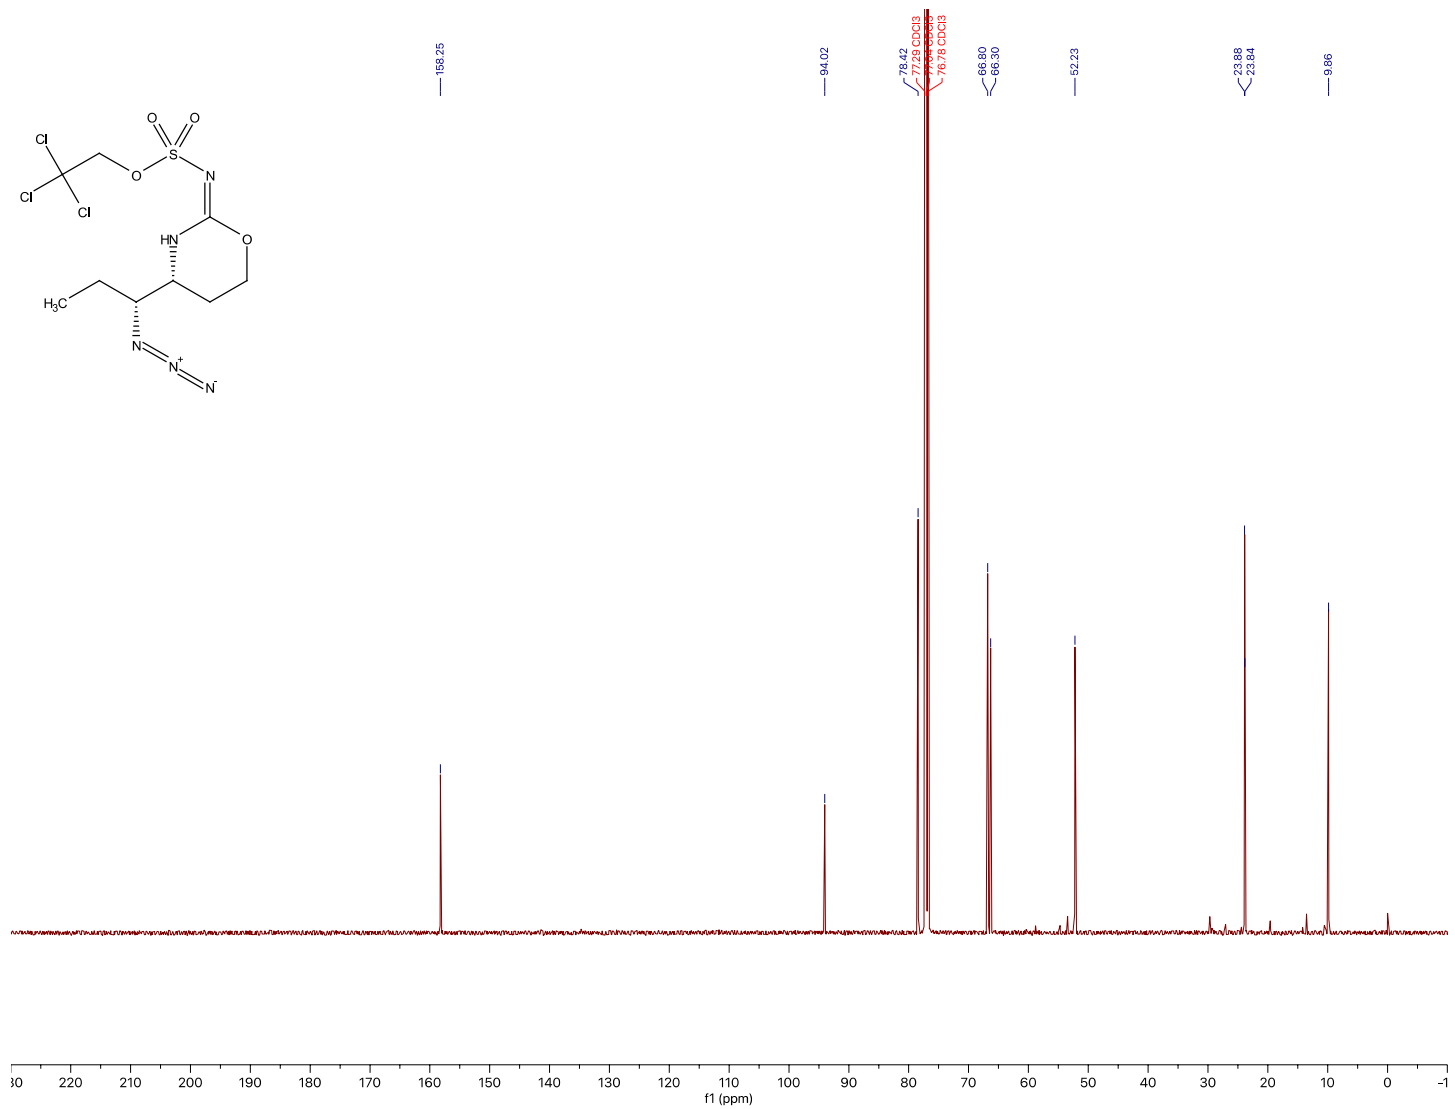

<sup>1</sup>H NMR (500 MHz, CDCl<sub>3</sub>) for Compound 5a

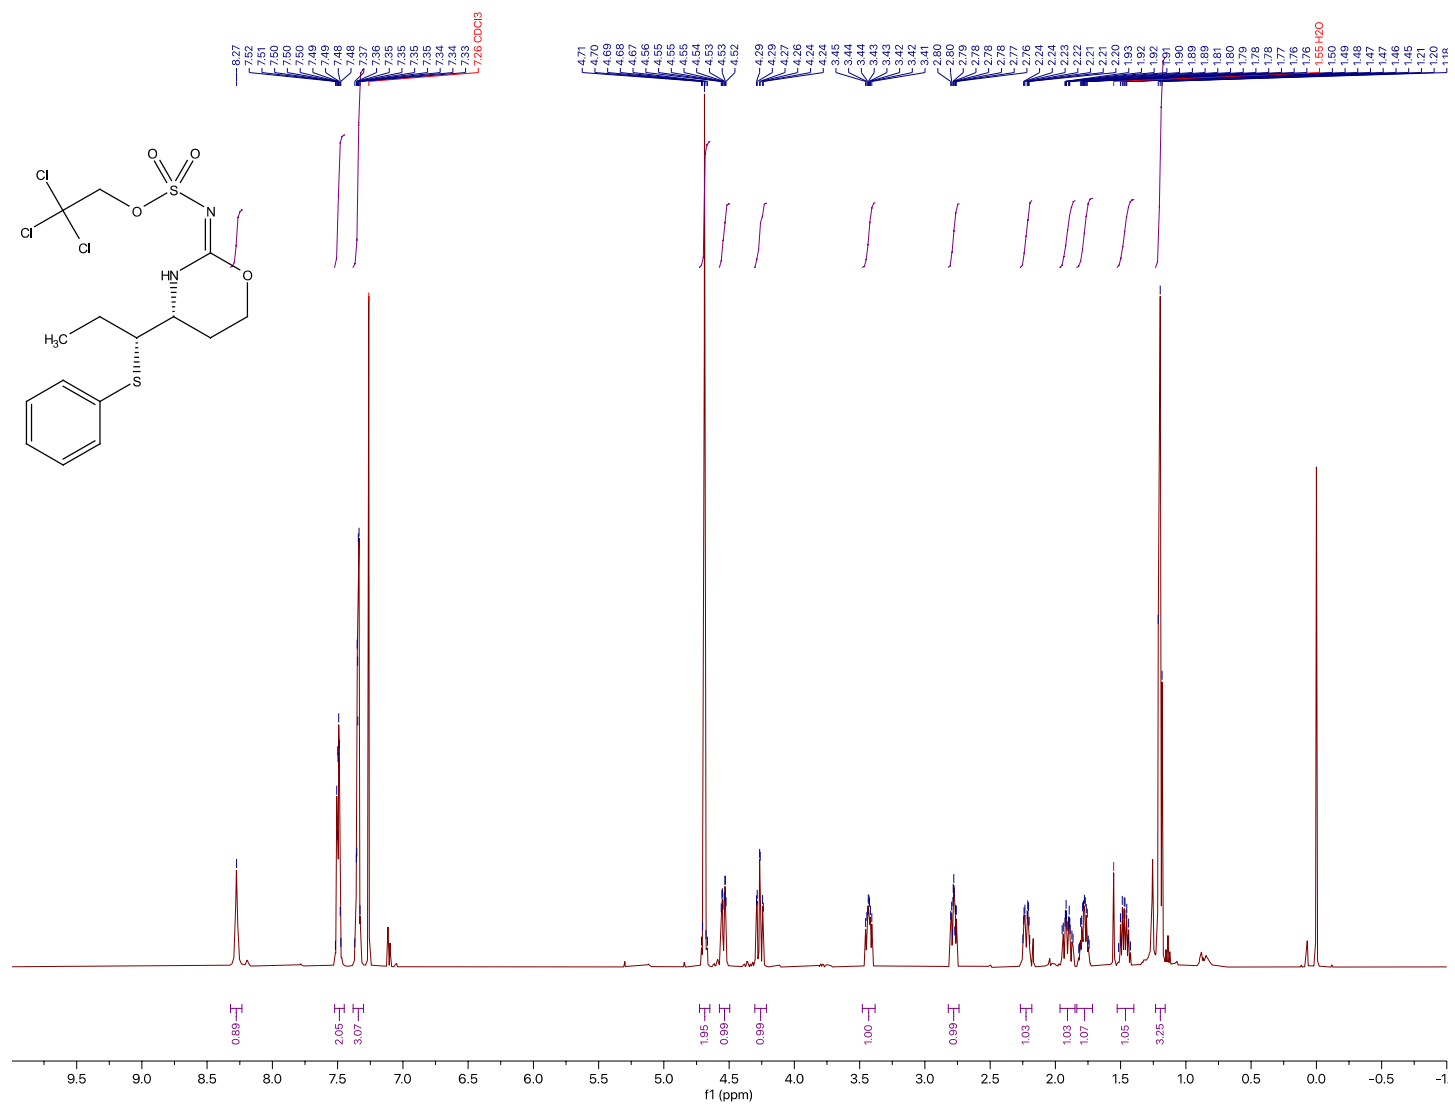

$^{13}\text{C}$  NMR (126 MHz,  $\text{CDCl}_3$ ) for **Compound 5a**

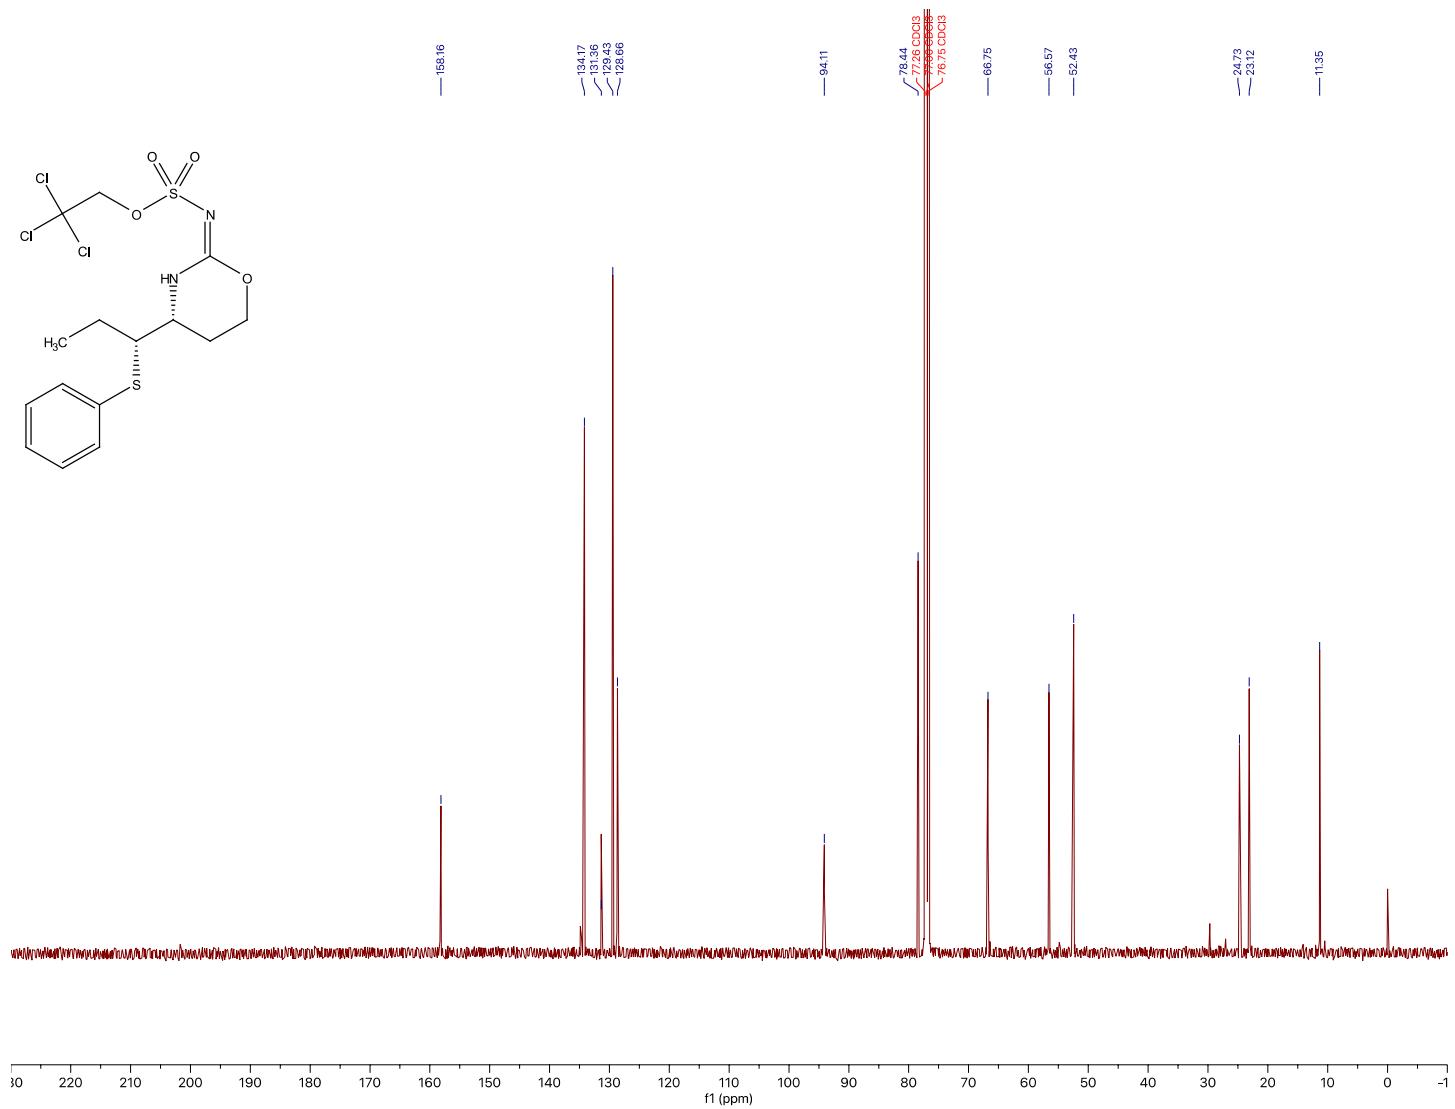

<sup>1</sup>H NMR (500 MHz, CDCl<sub>3</sub>) for Compound 5b

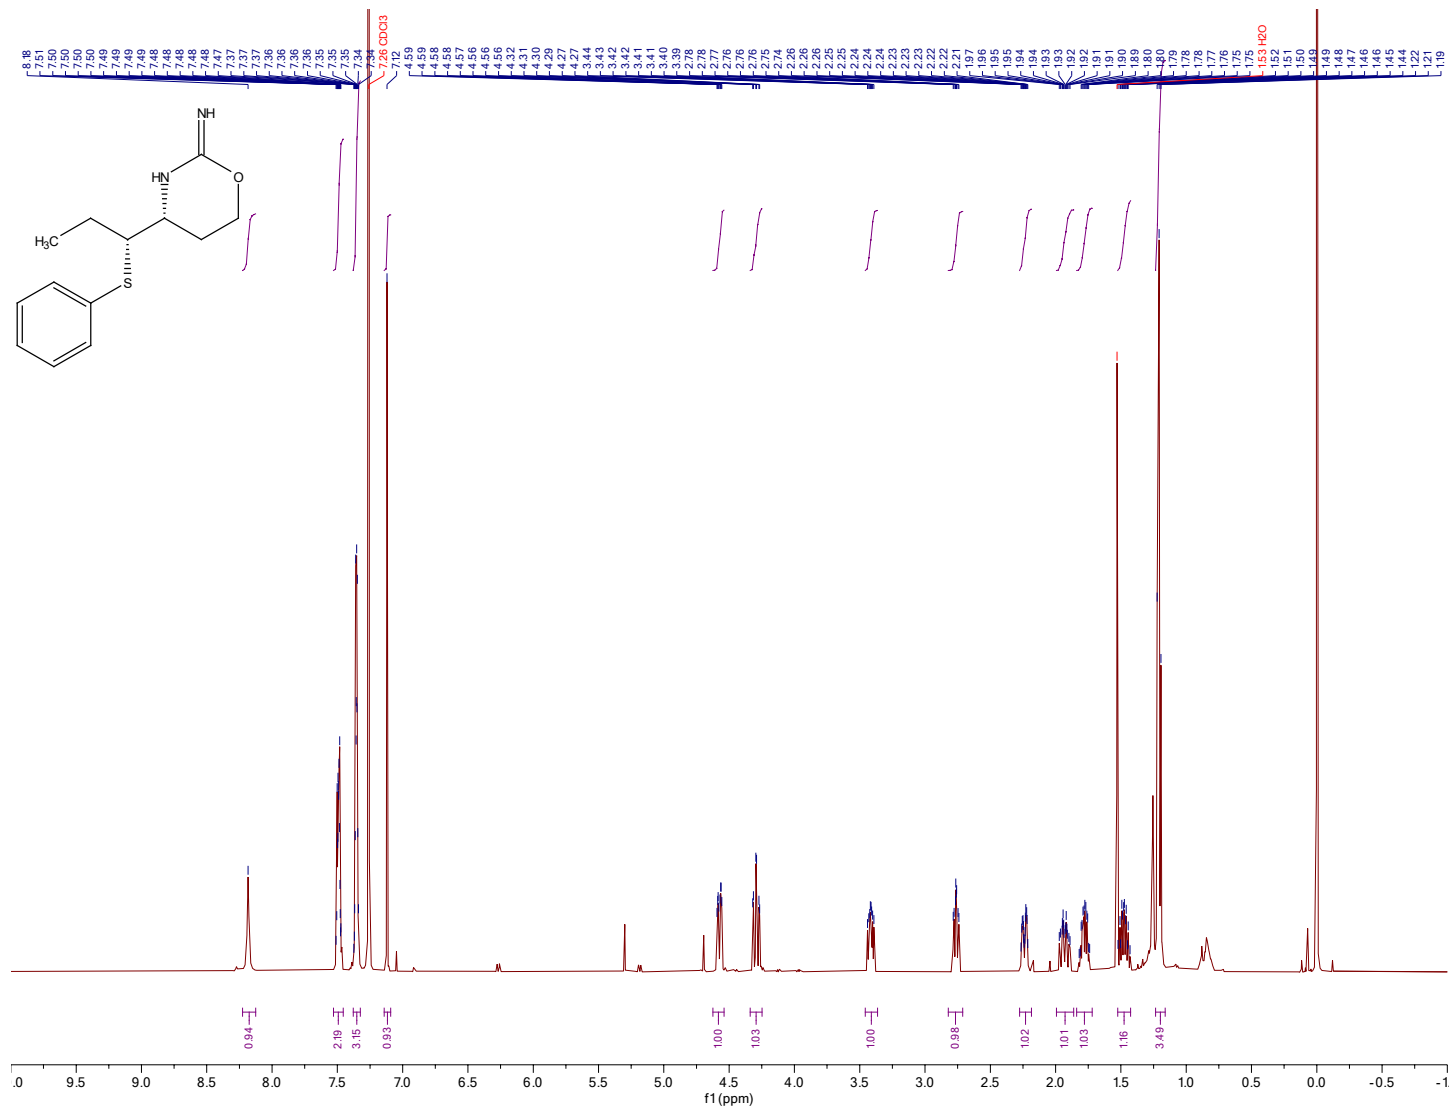

$^{13}\text{C}$  NMR (126 MHz,  $\text{CDCl}_3$ ) for **Compound 5b**

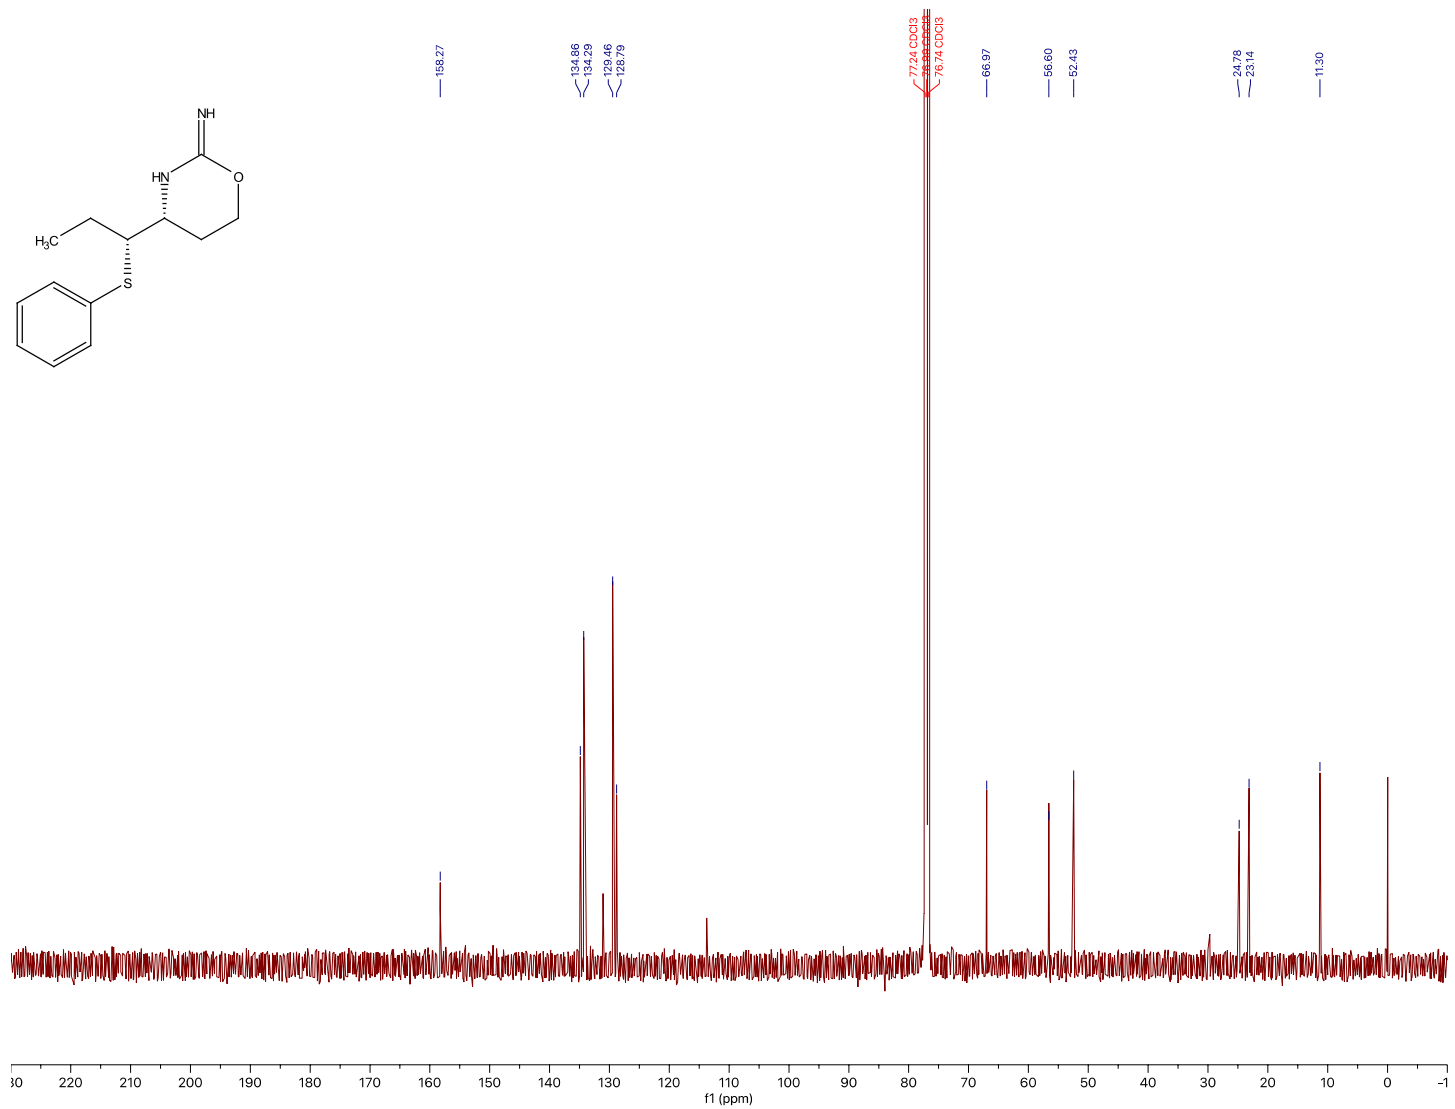

## IX. HPLC Chromatograms

Refer to section III for all HPLC method parameters.

### Compound 2a:

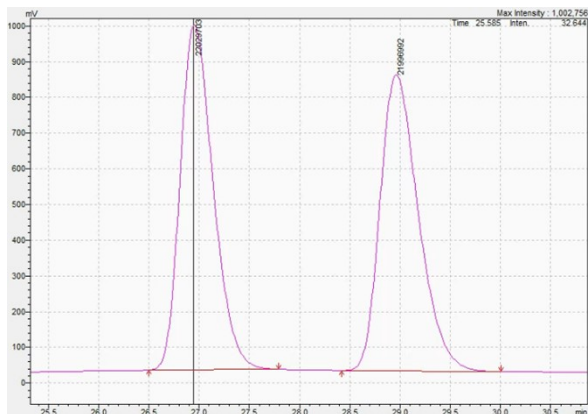

| Racemic |           |         |          |
|---------|-----------|---------|----------|
| Peak    | Ret. Time | Area%   | Area     |
| 1       | 26.949    | 50.037  | 22029703 |
| 2       | 28.959    | 49.963  | 21996992 |
| Total   |           | 100.000 | 44026695 |

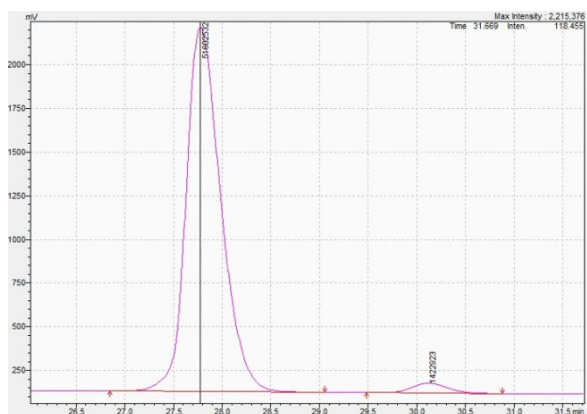

| Scalemic |           |         |          |
|----------|-----------|---------|----------|
| Peak     | Ret. Time | Area%   | Area     |
| 1        | 27.773    | 97.317  | 51602532 |
| 2        | 30.109    | 2.683   | 1422923  |
| Total    |           | 100.000 | 53025455 |

### Compound 2b:

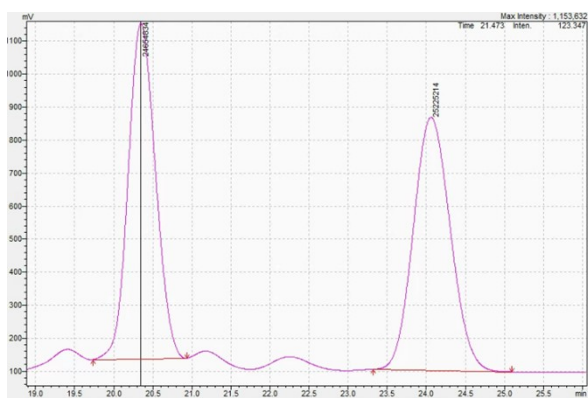

| Racemic |           |         |          |
|---------|-----------|---------|----------|
| Peak    | Ret. Time | Area%   | Area     |
| 1       | 20.347    | 49.428  | 24654834 |
| 2       | 24.061    | 50.572  | 25225214 |
| Total   |           | 100.000 | 49880048 |

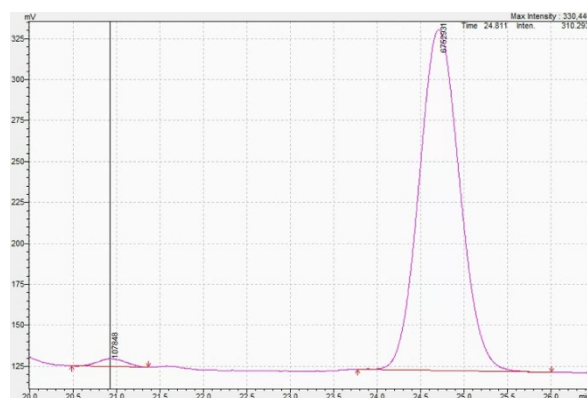

| Scalemic |           |         |         |
|----------|-----------|---------|---------|
| Peak     | Ret. Time | Area%   | Area    |
| 1        | 20.926    | 1.572   | 107848  |
| 2        | 24.712    | 98.428  | 6752931 |
| Total    |           | 100.000 | 6860779 |

**Compound 2c:**

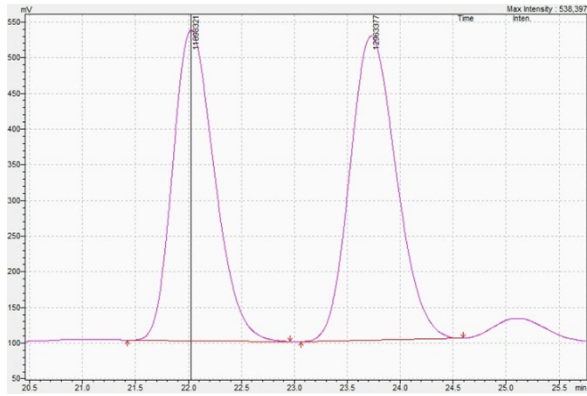

| Racemic |           |         |          |
|---------|-----------|---------|----------|
| Peak    | Ret. Time | Area%   | Area     |
| 1       | 22.025    | 47.858  | 11898321 |
| 2       | 23.727    | 52.142  | 12963377 |
| Total   |           | 100.000 | 24861697 |

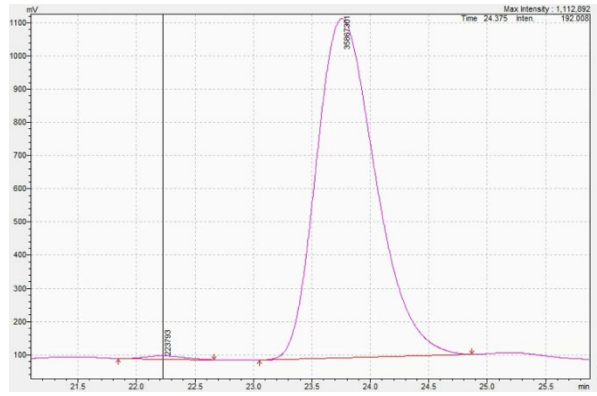

| Scalemic |           |         |          |
|----------|-----------|---------|----------|
| Peak     | Ret. Time | Area%   | Area     |
| 1        | 22.227    | 0.620   | 223793   |
| 2        | 23.758    | 99.380  | 35867301 |
| Total    |           | 100.000 | 36091094 |

**Compound 2d:**

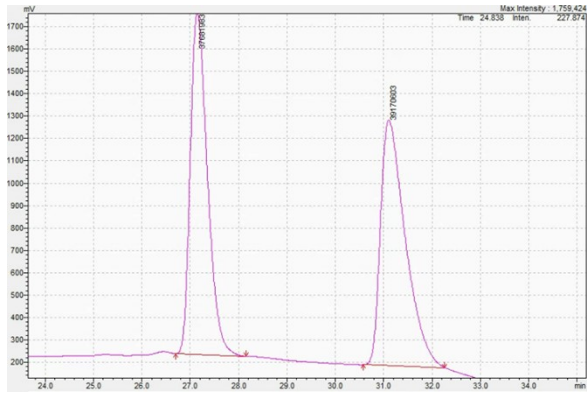

| Racemic |           |         |          |
|---------|-----------|---------|----------|
| Peak    | Ret. Time | Area%   | Area     |
| 1       | 27.141    | 49.032  | 37681983 |
| 2       | 31.104    | 50.968  | 39170603 |
| Total   |           | 100.000 | 76852586 |

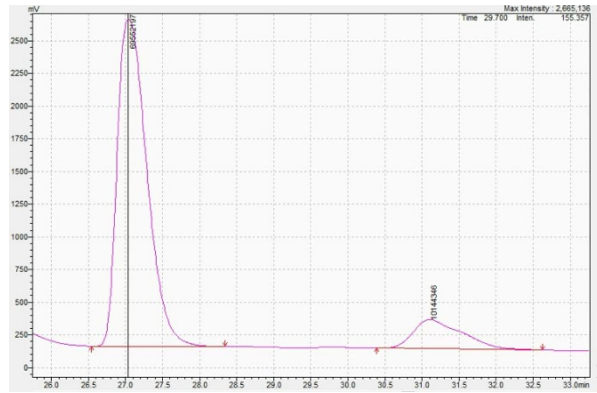

| Scalemic |           |         |          |
|----------|-----------|---------|----------|
| Peak     | Ret. Time | Area%   | Area     |
| 1        | 27.037    | 87.271  | 69552197 |
| 2        | 31.099    | 12.729  | 10144346 |
| Total    |           | 100.000 | 79696543 |



**Compound 2e:**

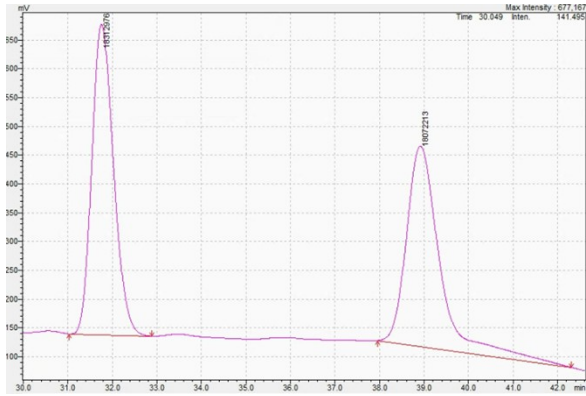

| Racemic |           |         |          |
|---------|-----------|---------|----------|
| Peak    | Ret. Time | Area%   | Area     |
| 1       | 31.753    | 50.331  | 18312976 |
| 2       | 38.912    | 49.669  | 18072213 |
| Total   |           | 100.000 | 36385189 |

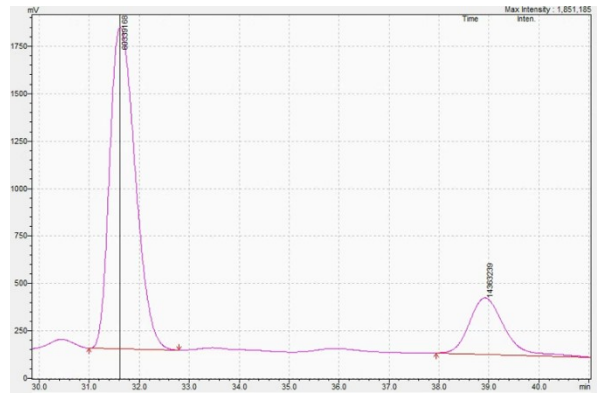

| Scalemic |           |         |          |
|----------|-----------|---------|----------|
| Peak     | Ret. Time | Area%   | Area     |
| 1        | 31.618    | 80.773  | 60339168 |
| 2        | 38.917    | 19.227  | 14363239 |
| Total    |           | 100.000 | 74702407 |

**Compound 2f:**

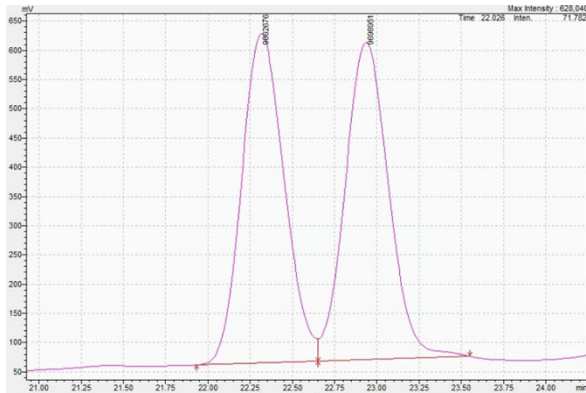

| Racemic |           |         |          |
|---------|-----------|---------|----------|
| Peak    | Ret. Time | Area%   | Area     |
| 1       | 22.313    | 50.418  | 9862676  |
| 2       | 22.932    | 49.582  | 9698951  |
| Total   |           | 100.000 | 19561627 |

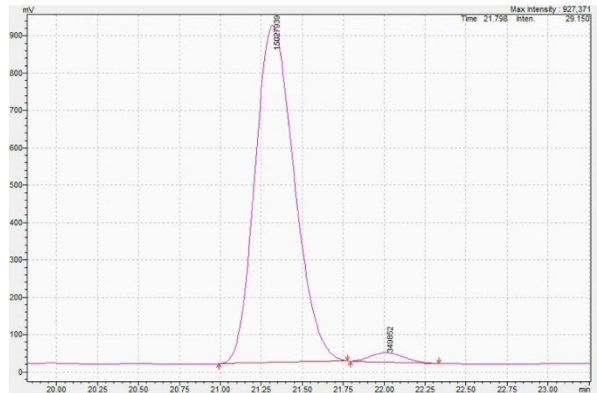

| Scalemic |           |         |          |
|----------|-----------|---------|----------|
| Peak     | Ret. Time | Area%   | Area     |
| 1        | 21.315    | 97.725  | 15027939 |
| 2        | 22.007    | 2.275   | 349852   |
| Total    |           | 100.000 | 15377791 |

**Compound 2g:**

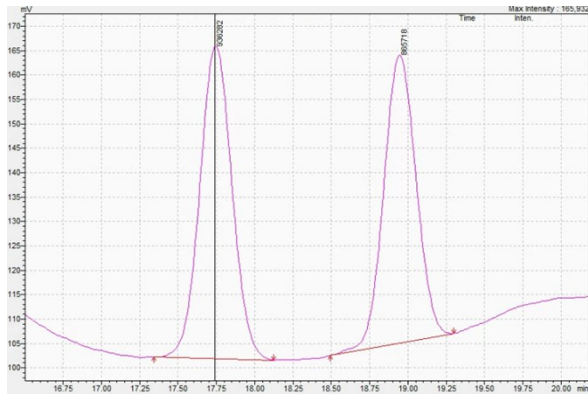

| Racemic |           |         |         |
|---------|-----------|---------|---------|
| Peak    | Ret. Time | Area%   | Area    |
| 1       | 17.741    | 51.958  | 936282  |
| 2       | 18.942    | 48.082  | 865718  |
| Total   |           | 100.000 | 1802001 |

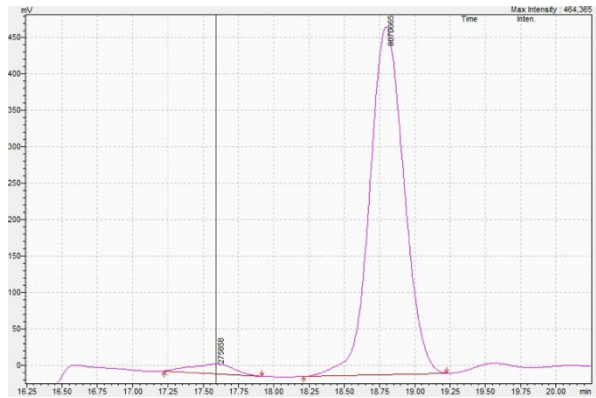

| Scalemic |           |         |         |
|----------|-----------|---------|---------|
| Peak     | Ret. Time | Area%   | Area    |
| 1        | 17.590    | 3.305   | 275858  |
| 2        | 18.792    | 96.695  | 8070665 |
| Total    |           | 100.000 | 8346523 |

**Compound 2h:**

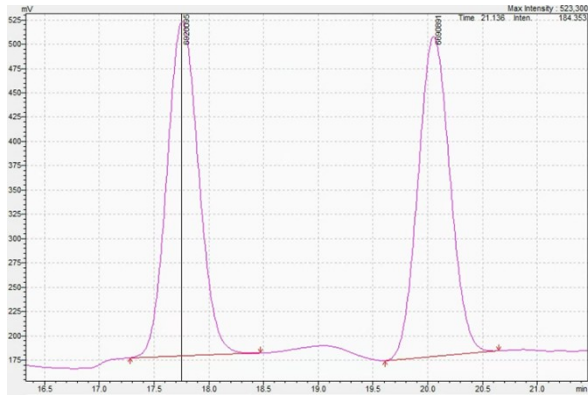

| Racemic |           |         |          |
|---------|-----------|---------|----------|
| Peak    | Ret. Time | Area%   | Area     |
| 1       | 17.754    | 50.842  | 6920095  |
| 2       | 20.050    | 49.158  | 6690891  |
| Total   |           | 100.000 | 13610985 |

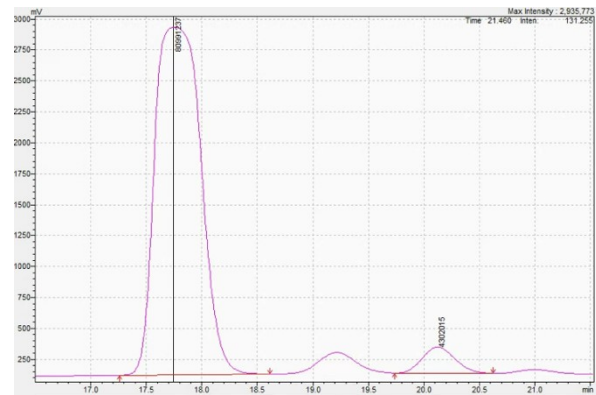

| Scalemic |           |         |          |
|----------|-----------|---------|----------|
| Peak     | Ret. Time | Area%   | Area     |
| 1        | 17.748    | 94.956  | 80991237 |
| 2        | 20.121    | 5.044   | 4302015  |
| Total    |           | 100.000 | 85293252 |

**Compound 2i:**

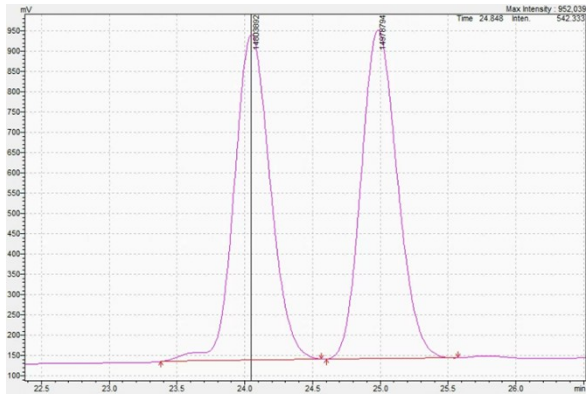

| Racemic |           |         |          |
|---------|-----------|---------|----------|
| Peak    | Ret. Time | Area%   | Area     |
| 1       | 24.045    | 49.706  | 14803892 |
| 2       | 24.979    | 50.294  | 14978794 |
| Total   |           | 100.000 | 29782686 |

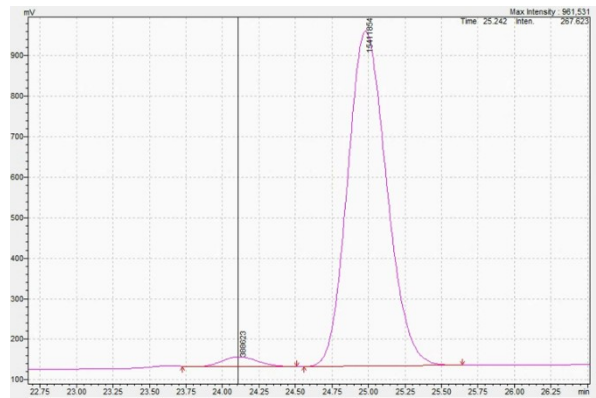

| Scalemic |           |         |          |
|----------|-----------|---------|----------|
| Peak     | Ret. Time | Area%   | Area     |
| 1        | 24.106    | 2.460   | 388623   |
| 2        | 24.977    | 97.540  | 15411854 |
| Total    |           | 100.000 | 15800478 |

**Compound 2j:**

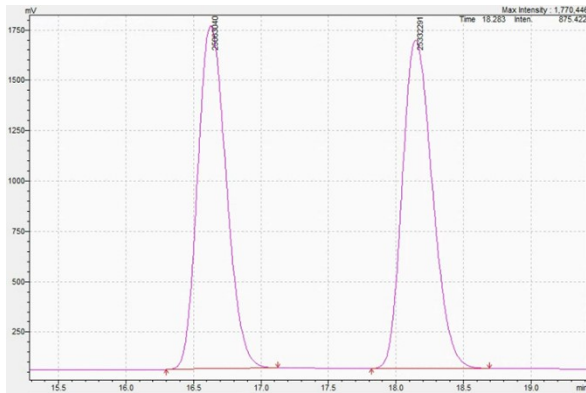

| Racemic |           |         |          |
|---------|-----------|---------|----------|
| Peak    | Ret. Time | Area%   | Area     |
| 1       | 16.624    | 49.733  | 25063040 |
| 2       | 18.143    | 50.267  | 25332291 |
| Total   |           | 100.000 | 50395332 |

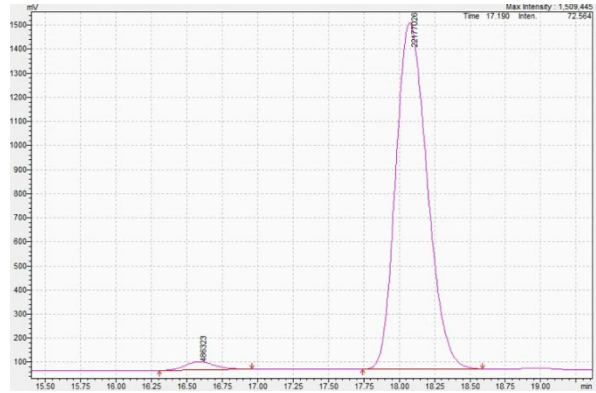

| Scalemic |           |         |          |
|----------|-----------|---------|----------|
| Peak     | Ret. Time | Area%   | Area     |
| 1        | 16.583    | 2.146   | 486323   |
| 2        | 18.071    | 97.854  | 22177026 |
| Total    |           | 100.000 | 22663349 |

**Compound 2k:**

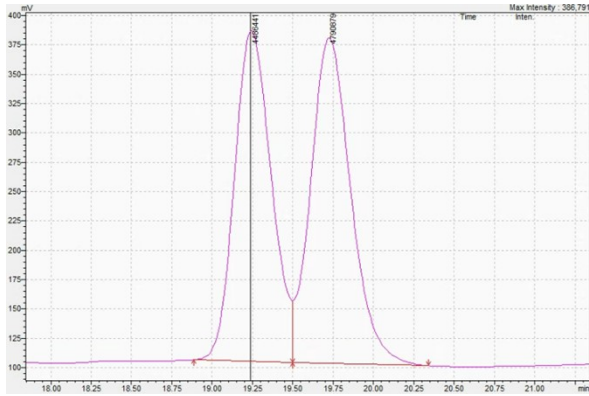

| Racemic |           |         |         |
|---------|-----------|---------|---------|
| Peak    | Ret. Time | Area%   | Area    |
| 1       | 19.239    | 48.359  | 4486441 |
| 2       | 19.721    | 51.641  | 4790879 |
| Total   |           | 100.000 | 9277319 |

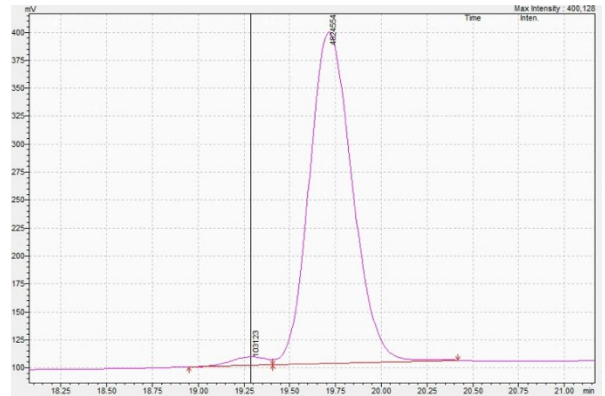

| Scalemic |           |         |         |
|----------|-----------|---------|---------|
| Peak     | Ret. Time | Area%   | Area    |
| 1        | 19.286    | 2.093   | 103123  |
| 2        | 19.711    | 97.907  | 4824554 |
| Total    |           | 100.000 | 4927677 |

**Compound 2l:**

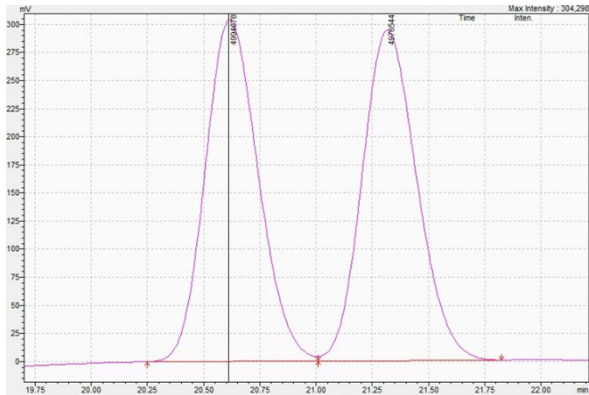

| Racemic |           |         |         |
|---------|-----------|---------|---------|
| Peak    | Ret. Time | Area%   | Area    |
| 1       | 20.611    | 50.091  | 4994678 |
| 2       | 21.313    | 49.909  | 4976544 |
| Total   |           | 100.000 | 9971222 |

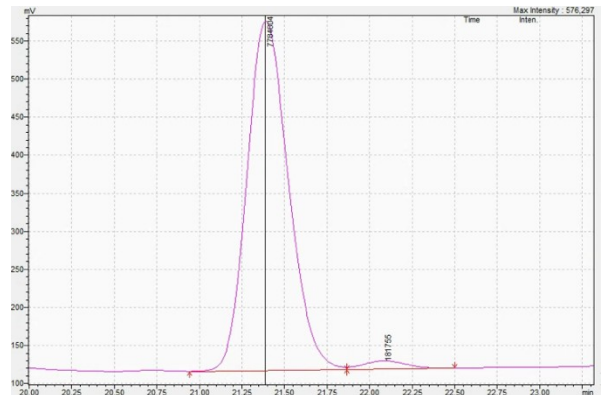

| Scalemic |           |         |         |
|----------|-----------|---------|---------|
| Peak     | Ret. Time | Area%   | Area    |
| 1        | 21.386    | 97.719  | 7784804 |
| 2        | 22.082    | 2.281   | 181755  |
| Total    |           | 100.000 | 7966558 |

**Compound 2m:**

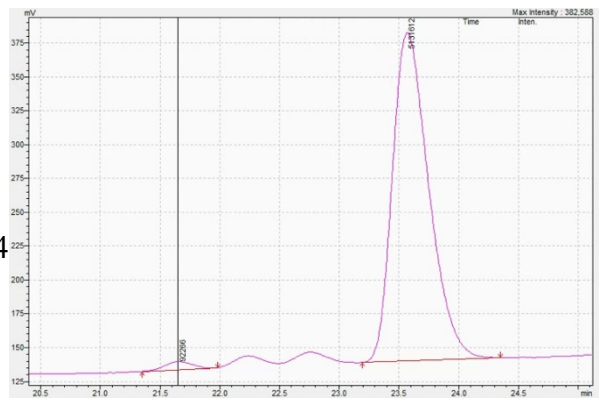

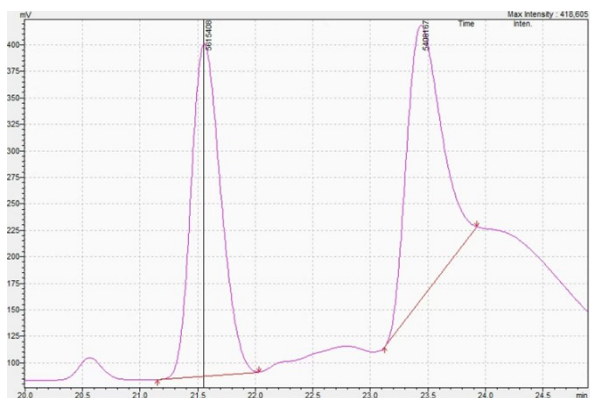

| Racemic |           |         |          |
|---------|-----------|---------|----------|
| Peak    | Ret. Time | Area%   | Area     |
| 1       | 21.552    | 50.940  | 5615408  |
| 2       | 23.437    | 49.060  | 5408167  |
| Total   |           | 100.000 | 11023575 |

| Scalemic |           |         |         |
|----------|-----------|---------|---------|
| Peak     | Ret. Time | Area%   | Area    |
| 1        | 21.651    | 1.766   | 92266   |
| 2        | 23.566    | 98.234  | 5131612 |
| Total    |           | 100.000 | 5223877 |

**Compound 2o:**

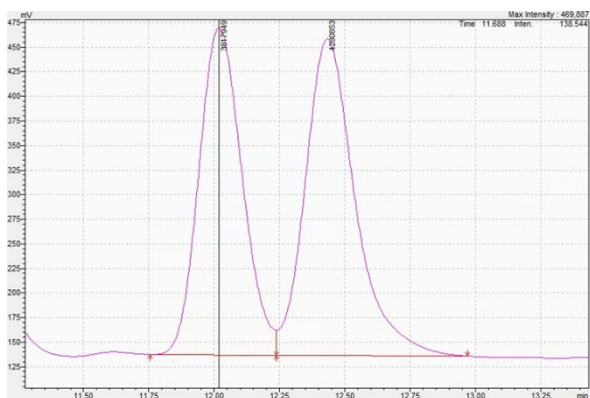

| Racemic |           |         |         |
|---------|-----------|---------|---------|
| Peak    | Ret. Time | Area%   | Area    |
| 1       | 12.018    | 47.142  | 3817949 |
| 2       | 12.433    | 52.858  | 4280853 |
| Total   |           | 100.000 | 8098802 |

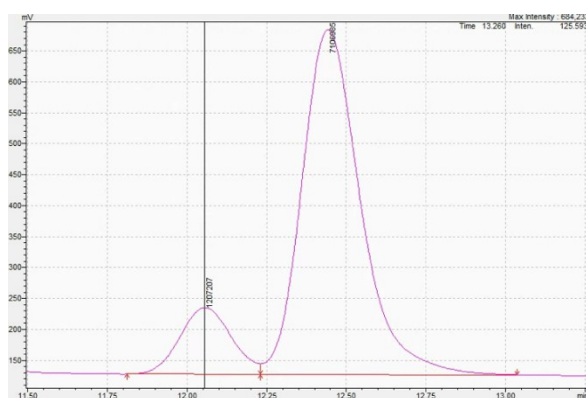

| Scalemic |           |         |         |
|----------|-----------|---------|---------|
| Peak     | Ret. Time | Area%   | Area    |
| 1        | 12.056    | 14.520  | 1207207 |
| 2        | 12.443    | 85.480  | 7106985 |
| Total    |           | 100.000 | 8314192 |

**Compound 2p:**

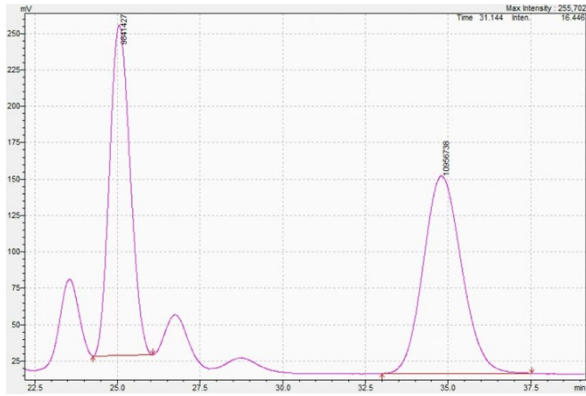

| Racemic |           |         |          |
|---------|-----------|---------|----------|
| Peak    | Ret. Time | Area%   | Area     |
| 1       | 25.052    | 47.319  | 9841427  |
| 2       | 34.799    | 52.681  | 10956738 |
| Total   |           | 100.000 | 20798166 |

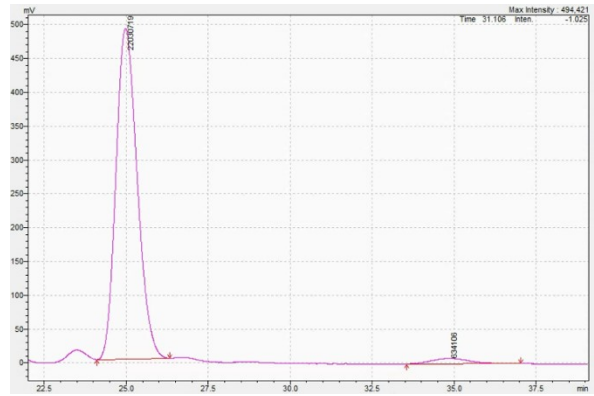

| Scalemic |           |         |          |
|----------|-----------|---------|----------|
| Peak     | Ret. Time | Area%   | Area     |
| 1        | 24.976    | 97.202  | 22030719 |
| 2        | 34.855    | 2.798   | 634106   |
| Total    |           | 100.000 | 22664825 |

**Compound 2q:**

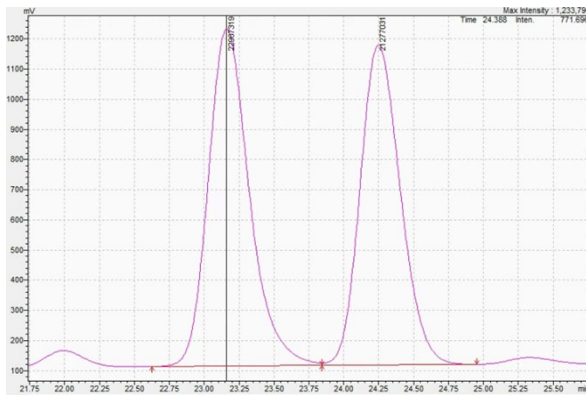

| Racemic |           |         |          |
|---------|-----------|---------|----------|
| Peak    | Ret. Time | Area%   | Area     |
| 1       | 23.157    | 51.910  | 22967319 |
| 2       | 24.243    | 48.090  | 21277031 |
| Total   |           | 100.000 | 44244349 |

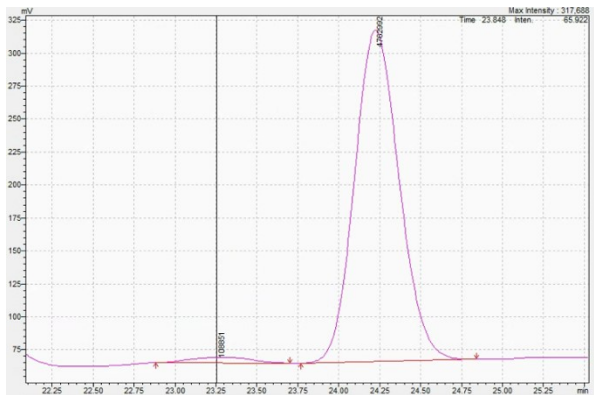

| Scalemic |           |         |         |
|----------|-----------|---------|---------|
| Peak     | Ret. Time | Area%   | Area    |
| 1        | 23.253    | 2.234   | 108851  |
| 2        | 24.221    | 97.766  | 4762992 |
| Total    |           | 100.000 | 4871843 |

**Compound 2r:**

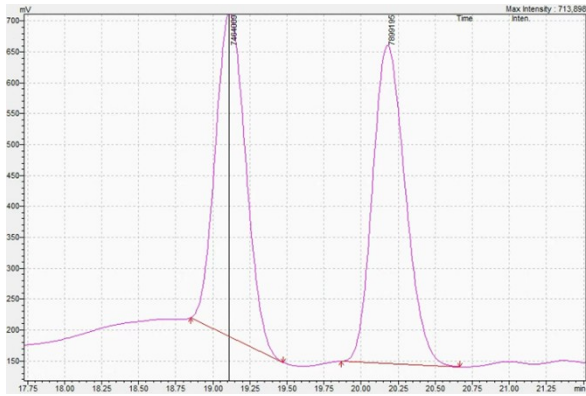

| Racemic |           |         |          |
|---------|-----------|---------|----------|
| Peak    | Ret. Time | Area%   | Area     |
| 1       | 19.110    | 48.584  | 7464009  |
| 2       | 20.174    | 51.416  | 7899195  |
| Total   |           | 100.000 | 15363204 |

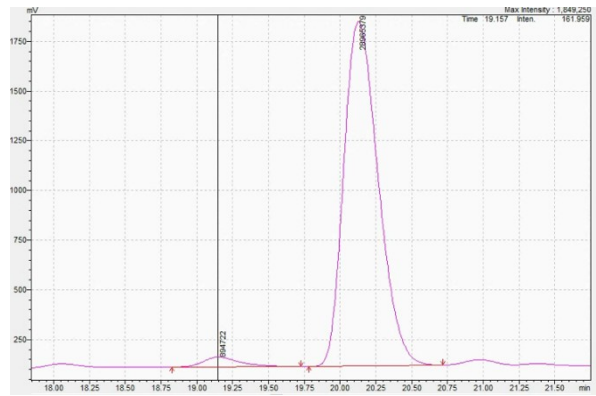

| Scalemic |           |         |          |
|----------|-----------|---------|----------|
| Peak     | Ret. Time | Area%   | Area     |
| 1        | 19.146    | 2.996   | 894722   |
| 2        | 20.124    | 97.004  | 28965379 |
| Total    |           | 100.000 | 29860102 |

**Compound 2s:**

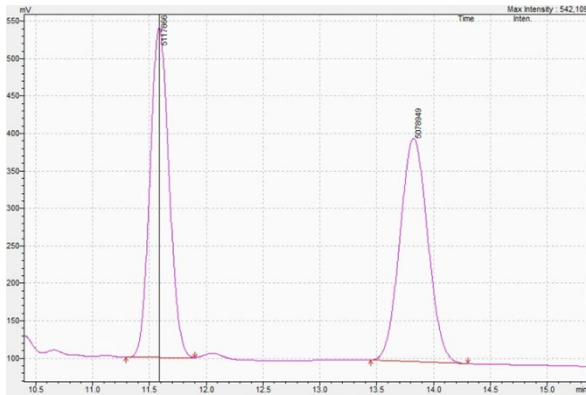

| Racemic |           |         |          |
|---------|-----------|---------|----------|
| Peak    | Ret. Time | Area%   | Area     |
| 1       | 11.587    | 50.191  | 5117866  |
| 2       | 13.824    | 49.809  | 5078949  |
| Total   |           | 100.000 | 10196815 |

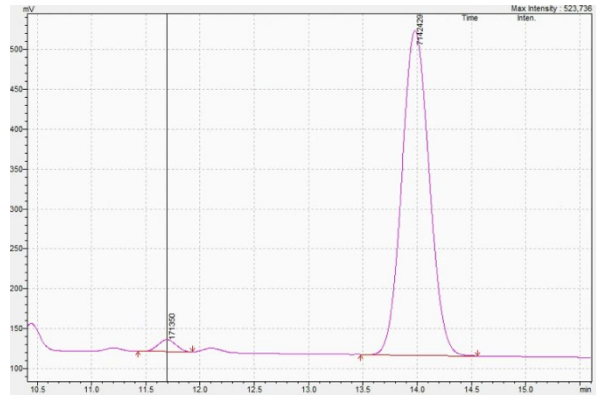

| Scalemic |           |         |         |
|----------|-----------|---------|---------|
| Peak     | Ret. Time | Area%   | Area    |
| 1        | 11.694    | 2.343   | 171350  |
| 2        | 13.982    | 97.657  | 7142429 |
| Total    |           | 100.000 | 7313779 |

**Compound 2t:**

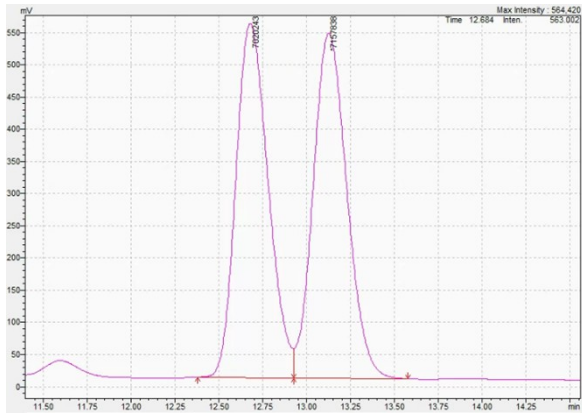

| Racemic |           |         |          |
|---------|-----------|---------|----------|
| Peak    | Ret. Time | Area%   | Area     |
| 1       | 12.678    | 49.515  | 7020243  |
| 2       | 13.125    | 50.485  | 7157838  |
| Total   |           | 100.000 | 14178081 |

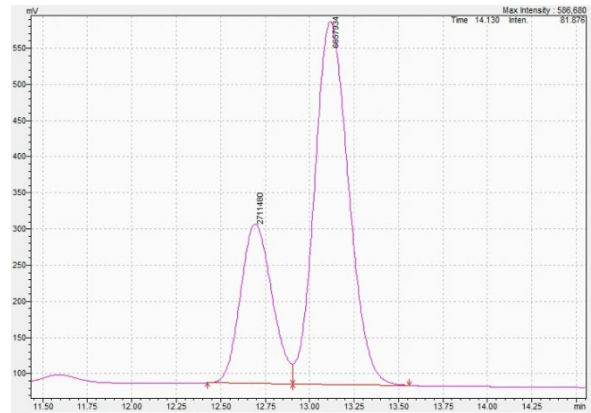

| Scalemic |           |         |         |
|----------|-----------|---------|---------|
| Peak     | Ret. Time | Area%   | Area    |
| 1        | 12.694    | 28.940  | 2711480 |
| 2        | 13.117    | 71.060  | 6657934 |
| Total    |           | 100.000 | 9369414 |

**Compound 2v:**

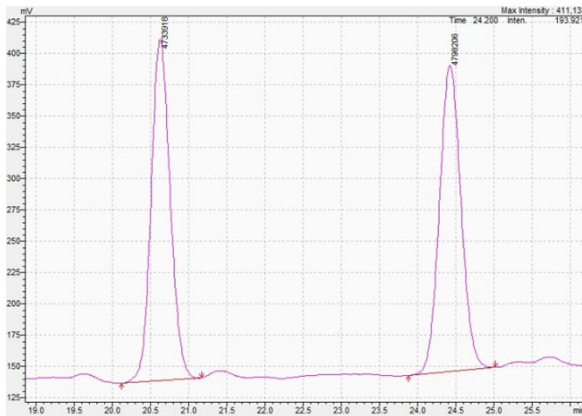

| Racemic |           |         |         |
|---------|-----------|---------|---------|
| Peak    | Ret. Time | Area%   | Area    |
| 1       | 20.624    | 49.663  | 4733918 |
| 2       | 24.419    | 50.337  | 4798206 |
| Total   |           | 100.000 | 9532125 |

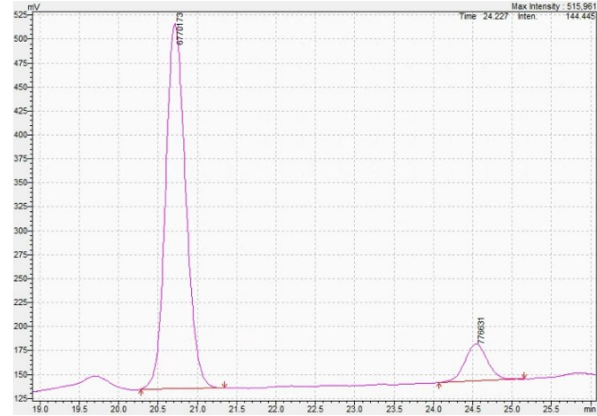

| Scalemic |           |         |         |
|----------|-----------|---------|---------|
| Peak     | Ret. Time | Area%   | Area    |
| 1        | 20.710    | 89.709  | 6770173 |
| 2        | 24.539    | 10.291  | 776631  |
| Total    |           | 100.000 | 7546804 |



**Compound 2w and 2w':**

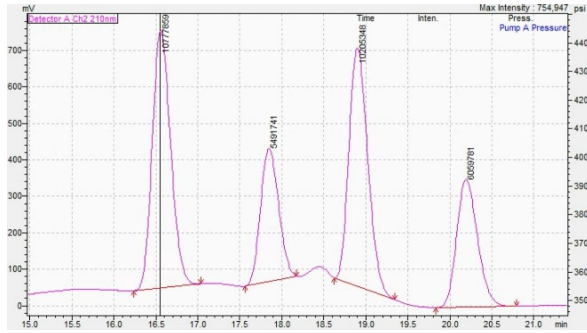

| Racemic |           |         |          |
|---------|-----------|---------|----------|
| Peak    | Ret. Time | Area%   | Area     |
| 1       | 16.554    | 33.127  | 10777859 |
| 2       | 17.842    | 16.880  | 5491741  |
| 3       | 18.896    | 31.368  | 10205348 |
| 4       | 20.190    | 18.626  | 6059781  |
| Total   |           | 100.000 | 32534729 |

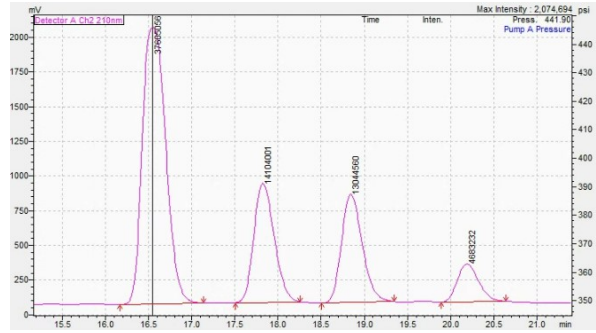

| Scalemic |           |         |          |
|----------|-----------|---------|----------|
| Peak     | Ret. Time | Area%   | Area     |
| 1        | 16.543    | 54.157  | 37605056 |
| 2        | 17.821    | 20.312  | 14104001 |
| 3        | 18.839    | 18.786  | 13044560 |
| 4        | 20.186    | 6.745   | 4683232  |
| Total    |           | 100.000 | 69436849 |

**Compound 2x:**

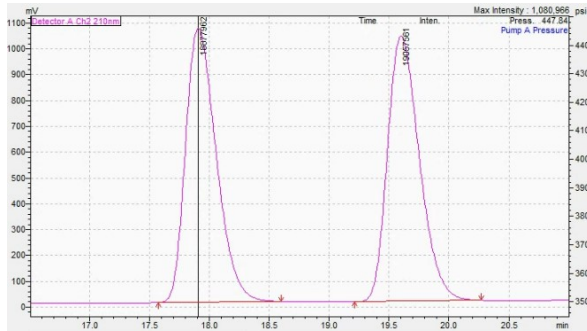

| Racemic |           |         |          |
|---------|-----------|---------|----------|
| Peak    | Ret. Time | Area%   | Area     |
| 1       | 17.905    | 49.763  | 18877962 |
| 2       | 19.597    | 50.237  | 19057561 |
| Total   |           | 100.000 | 37935522 |

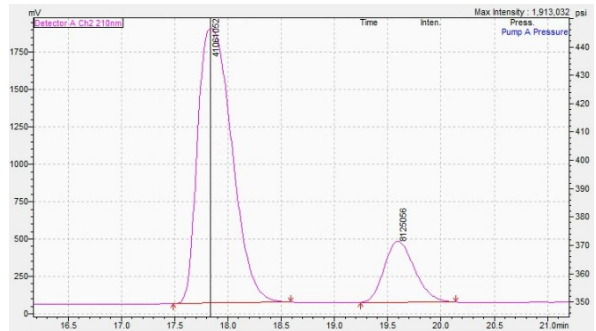

| Scalemic |           |         |          |
|----------|-----------|---------|----------|
| Peak     | Ret. Time | Area%   | Area     |
| 1        | 17.838    | 83.481  | 41061052 |
| 2        | 19.592    | 16.519  | 8125056  |
| Total    |           | 100.000 | 49186107 |
